# Supplementary material for: Next-generation sequencing methylation profiling of subjects with obesity identifies novel gene changes
Source: Clin Epigenetics. 2016 Jul 18;8:77. doi: 10.1186/s13148-016-0246-x (PMC4950754; doi:10.1186/s13148-016-0246-x)
Supplement: Additional file 1: Table S1. — The 13,130 differentially methylated cytosines (DMCs; P < 0.05) that were located within a promoter or untranslated regions (3' and 5'). (XLSX 2880 kb) [file 13148_2016_246_MOESM1_ESM.xlsx]

## Sheet: Sheet1
Additional File 1: Table S1. The 13,130 differentially methylated cytosines (DMCs; P<0.05) that were located within a promoter or untranslated regions (3’ and 5’).
Chr. Position	Methyl Difference (%)	Pvalue	Strand	Genic Region	CpG Island Region	Gene	Transcript	Entrez_id	T03_Lean	T04_Lean	T05_Lean	T06_Lean	T08_Lean	T09_Lean	T16S_Lean	T18_Lean	T20_Lean	T24_Lean	T27_Lean	T10_Obese	T11_Obese	T13_Obese	T14_Obese	T15_Obese	T17_Obese	T19_Obese	T21_Obese	T22_Obese
chr4.53315	10.1539	0.0193487	-	utr5	Cpg_island	ZNF595	NM_182524	152687	0.123288	0.242574	0.377163	0.256757	0.222874	0.219178	0.0588235	0.183521	0.277778	0.275641	0.301176	0.291317	0.362573	0.436681	0.215247	0.296837	0.293617	0.38009	0.348718	0.277027
chr4.53363	1.77365	0.0291067	-	utr5	Cpg_island	ZNF718	NM_001039127	255403	0	0	0	0	0	0	0	0	0	0	0	0.0685714	0	0	0.0431034	0	0	0	0.015873	0
chr16.102348	-11.8983	0.00350666	-	promoter	North_shore	POLR3K	NM_016310	51728	1	1	0.904762	1	0.961538	1	NA	1	1	0.818182	0.925373	0.825	0.909091	0.884615	0.896552	0.6875	0.772727	0.923077	0.962963	0.72
chr6.148273	-5.20079	0.0163508	+	promoter	intercpg	-	-	-	1	1	1	1	0.933333	1	1	1	1	0.958333	1	0.921875	0.95	0.9	0.967742	0.966667	0.95	0.9375	1	0.826087
chr6.148277	-6.06503	0.018233	+	promoter	intercpg	-	-	-	1	0.9	1	1	0.966667	1	1	1	1	0.916667	1	0.875	1	1	0.935484	0.866667	0.95	1	0.888889	0.826087
chr17.182888	5.07248	0.0403242	+	utr5	North_shelf	RPH3AL	NM_001190412;NM_006987;NM_001190413;NM_001190411	9501	0	0.0208333	0	0	0.0882353	0.0666667	0	0.0645161	0.0833333	0	0	0.0972222	0.0384615	0.03125	0.176471	0.0138889	0.0588235	0	0.111111	0.136364
chr17.182896	16.2464	0.00470682	+	utr5	North_shelf	RPH3AL	NM_001190412;NM_006987;NM_001190413;NM_001190411	9501	0	0.0833333	0	NA	0.142857	0.181818	0	0.0740741	0.176471	0	0	0.2	0.1	0.235294	0.418605	0.0188679	0.181818	0.266667	0.285714	0.254902
chr17.182928	9.91446	0.0227288	+	utr5	North_shelf	RPH3AL	NM_001190412;NM_006987;NM_001190413;NM_001190411	9501	0	0.0416667	0	0	0.142857	0.181818	0	0	0.176471	0	0	0	0.1	0.0285714	0.27907	0.0188679	0.181818	0.133333	0.285714	0.156863
chr16.189101	4.86069	0.0177882	-	promoter	South_shore	NPRL3	NM_001077350;NM_001039476	8131	0	0	0	0	0	0	0	0	0	0	0	0.16129	0	0	0	0.047619	0	0	0.133333	0
chr16.189110	4.82842	0.00523296	+	promoter	South_shore	NPRL3	NM_001077350;NM_001039476	8131	0.00793651	0	0	0	0	0	0	0.0581395	0	0.0365854	0.0224719	0.174107	0.0555556	0.0617284	0.0336538	0.0198413	0.0588235	0.0833333	0.05	0.00961539
chr5.190287	21.3599	0.00802466	-	promoter	North_shore	LRRC14B	NM_001080478	389257	0	0.277778	0.428571	NA	0.264706	0.5	NA	0.25	0.166667	0.55	0.5	0.619048	0.5	0.3	NA	0.585366	0.764706	0.380952	0.571429	0.6
chr11.208958	2.46824	0.040524	+	promoter	Cpg_island	RIC8A	NM_021932	60626	0	0	0	0	0	0	0	0	0	0	0	0.142857	0	0.03125	0	0	0	0	0	0.0114943
chr11.209354	7.664	0.0342499	-	promoter	South_shore	BET1L	NM_016526;NM_001098787	51272	NA	0	0	0	0	0	NA	0	NA	0	0	0.324324	0.027027	0	0	0	0.166667	0	0.1	0
chr9.214630	5.09039	0.00936543	+	promoter	Cpg_island	DOCK8	NM_203447	81704	0	0	0	0	0	0	0	0	0	0	0	0.173913	0.0666667	0	0.0714286	0	0	NA	0	0.0555556
chr9.214645	2.53033	0.0290147	+	promoter	Cpg_island	C9orf66	NM_152569	157983	0	0	0	0	0	0	0	0	0	0	0	0	0.0666667	0	0.0714286	0	0	NA	0	0.0555556
chr16.215337	1.32244	0.0355217	-	promoter	Cpg_island	HBM	NM_001003938	3042	0	0	NA	0	0	0	0	0	0	0	0	0	0	0	0	0	0.0416667	0	0.0526316	0.0196078
chr16.215961	3.39831	0.0281158	-	promoter	Cpg_island	HBM	NM_001003938	3042	0	0	0	0	0	0	0	0	0	0	0	0	0.0416667	0	0	0	0	0.157895	0.0952381	0
chrX.219389	-7.15465	0.0466925	+	utr3	North_shelf	PLCXD1	NR_028057;NM_018390	55344	NA	0.944444	1	0.954545	1	1	NA	1	0.833333	1	0.961538	0.83871	1	NA	0.972973	0.962963	0.714286	1	0.809524	0.8
chrX.219487	-13.9751	0.04825	+	utr3	North_shelf	PLCXD1	NR_028057;NM_018390	55344	NA	1	NA	1	0.956522	1	NA	1	1	1	0.775	0.789474	0.966667	0.8	0.705882	1	1	0.8125	0.411765	0.9
chrX.219821	5.64623	0.0396526	-	utr3	North_shore	PLCXD1	NR_028057;NM_018390	55344	1	0.923077	1	NA	1	1	NA	1	0.8	1	0.865546	1	1	1	1	1	1	1	1	1
chr16.222198	-4.2102	0.0184049	+	promoter	North_shore	HBA2	NM_000517	3040	0	0.0350877	0.0909091	NA	0.1	0	0.16	0.0909091	0.0769231	0.0526316	0.00970874	0.0384615	0	0.0344828	0.0263158	0	0	0	0	0
chr16.223669	4.9539	0.0477319	+	utr3	South_shore	HBA2	NM_000517	3040	0.25	0	0	0	0.078125	0	0	0.0810811	0.0625	0	0.0598291	0.149254	0.12	0.0909091	0	0.0416667	0.193548	0.04	0.0606061	0.111111
chr16.226214	5.44108	0.00830592	-	promoter	Cpg_island	HBQ1	NM_005331	3049	0	0	0	0	0.0454545	0	0	0	0	0	0	0.114943	0	0.16129	0	0.0172414	0	0.0526316	0.1	0.0704225
chr16.230452	4.07232	0.012472	-	utr5	Cpg_island	HBQ1	NM_005331	3049	0	0	0	0	0	0	0	0	0	0	0	0.173077	0	0	0	0.0357143	0.0232558	0	0	0.04
chr16.230457	3.20597	0.0265071	+	utr5	Cpg_island	HBQ1	NM_005331	3049	0	0	0	NA	0	0	NA	0	0	0	0	0.0444444	0	0	0	0.09375	0	0	0	0.103448
chr3.238726	-1.18526	0.0187683	+	utr5	Cpg_island	CHL1	NM_006614	10752	0	0	0	0	0.02	0.0714286	0	0	0	0	0.021164	0	0	0	0	0	0	0	0	0
chr16.239232	-11.215	0.0112471	-	utr3	South_shore	LUC7L	NM_201412;NM_018032	55692	1	0.88	0.875	1	0.962264	1	1	0.977011	0.851852	0.807692	1	0.832061	0.866667	1	0.764706	0.857143	0.876289	0.947368	0.8125	0.677419
chr16.280427	10.5436	0.0199494	+	promoter	North_shore	ITFG3	NM_032039	83986	0.785714	0.884615	0.961538	0.647059	0.821429	0.888889	0.521739	1	0.846154	0.944444	0.853659	1	0.880952	0.966667	1	0.970588	0.878788	0.923077	0.941176	0.939394
chr16.280461	-10.9662	0.0454274	+	promoter	North_shore	LUC7L	NM_201412;NM_018032	55692	0.805556	0.894737	1	0.944444	0.961538	0.666667	1	0.666667	0.8125	1	0.902439	0.68	0.666667	0.894737	NA	0.590909	0.9	0.916667	0.866667	0.725
chr12.284450	-32.3099	0.00926731	-	utr3	intercpg	FAM20C	NM_020223	56975	0.706897	0.619048	0.769231	1	0.190476	0.647059	1	1	0.625	0.65625	0.758621	0.5	0.423077	0.73913	0	0.26087	0.52	0.333333	0.5625	0.534884
chr12.284509	20.6872	0.00938971	-	utr3	intercpg	IQSEC3	NM_001170738	440073	0	0.238095	0.230769	0	0.333333	0.411765	0	0.375	0.0833333	0.193548	0	0.222222	0.576923	0.304348	0.27027	0.217391	0.28	0.25	0.375	0.465116
chr11.288159	16.6758	0.0415723	-	promoter	North_shore	ATHL1	NM_025092	80162	0.461538	0.166667	0.166667	NA	0.25	0.428571	0	0.030303	0.294118	0.444444	0.407895	0.4	0.485714	0.344828	0.581395	0.527778	0.272727	0.25	0.235294	0.425
chr11.288173	7.20088	0.00895576	+	promoter	North_shore	ATHL1	NM_025092	80162	0	0	0.125	NA	0	0	0	0	0	0.05	0	0.189655	0.129032	0.136364	0	0	0.027027	0.111111	0.027027	0.05
chr11.288305	14.0243	0.036449	+	promoter	North_shore	ATHL1	NM_025092	80162	0.666667	0	0	0.177778	0.047619	0.0625	0	0	0.0714286	0.25	0.0555556	0.333333	0.363636	0	0.176471	0.129032	0.368421	0.222222	0.0740741	0.272727
chr11.288326	7.0114	0.0124402	+	promoter	North_shore	ATHL1	NM_025092	80162	0	0	0	0	0.047619	0.0625	0	0	0	0.0833333	0	0.0392157	0.166667	0.333333	0	0.1875	0	0.111111	0.133333	0
chr11.288549	-4.42183	0.023998	-	promoter	North_shore	ATHL1	NM_025092	80162	0.125	0	0	0	0	0.0909091	0	0.222222	0	0.111111	0	0	0	0	0	0	NA	0	0	0
chr17.291157	11.5463	0.0445672	-	utr3	Cpg_island	FAM101B	NM_182705	359845	NA	0.846154	1	NA	0.5	1	1	0.7	0.666667	0.928571	1	1	0.933333	1	1	1	1	1	1	0.952381
chr19.291356	3.68522	0.0199984	-	promoter	Cpg_island	PPAP2C	NM_177526;NM_003712;NM_177543	8612	0	0	0	0	0	0	0	0	0	0	0	0.147059	0	0.0714286	0	0	0	0	0.0833333	0
chr19.291746	-17.7936	0.0499625	-	promoter	Cpg_island	PPAP2C	NM_177526;NM_003712;NM_177543	8612	0.5625	0.0555556	0.3125	NA	0.0416667	0.125	0.869565	0.416667	0.352941	0	0	0	0.0434783	0	0.28125	0	0	0	0	0.16
chr19.291750	-14.4961	0.04067	-	promoter	Cpg_island	PPAP2C	NM_177526;NM_003712;NM_177543	8612	0.5625	0.111111	0.3125	NA	0	0.125	0	0.416667	0.294118	0	0.0803571	0	0	0	0.28125	0	0	0	0	0.16
chr19.291763	-9.34861	0.0291697	-	promoter	Cpg_island	PPAP2C	NM_177526;NM_003712;NM_177543	8612	0.5	0.111111	0.0625	NA	0	0.125	0	0.333333	0.0588235	0	0.00892857	0	0	0	0	0	0	0	0	0.16
chr19.291807	-9.24182	0.0318895	+	promoter	Cpg_island	PPAP2C	NM_177526;NM_003712;NM_177543	8612	0	0.166667	0.05	0.153846	0.0869565	0.166667	0	0.6	0.333333	0	0	0	0	0	0.0925926	0	0	0	0	0.103448
chr6.292069	-14.2285	0.00575476	-	utr5	Cpg_island	DUSP22	NM_020185	56940	0.153846	0.235294	0.047619	0.461538	0	0.5	0	0	0	0.125	0	0	0	0	0	0	0	0	0	0
chr11.295104	-16.7688	0.00157108	-	utr3	intercpg	ATHL1	NM_025092	80162	1	1	0.916667	1	0.875	0.875	1	NA	1	0.9	1	0.868421	0.666667	0.923077	0.583333	0.705882	1	0.888889	0.875	0.777778
chr19.306390	-11.7991	0.0332199	+	utr3	Cpg_island	MIER2	NM_017550	54531	NA	0.875	1	1	1	0.727273	NA	0.923077	0.75	0.916667	0.952381	0.863636	0.75	0.705882	0.647059	0.789474	0.666667	1	1	0.853659
chr19.306471	12.5699	0.00143958	-	utr3	Cpg_island	MIER2	NM_017550	54531	NA	0.941176	0.75	1	0.972973	0.875	NA	0.652174	0.875	0.727273	0.972222	1	0.964286	1	1	1	1	1	1	1
chr19.306558	11.7604	0.0381951	-	utr3	Cpg_island	MIER2	NM_017550	54531	NA	0.823529	0.777778	NA	0.8	0.875	NA	0.904762	0.5	0.727273	0.971429	1	0.777778	1	0.964286	1	1	0.9	0.809524	0.866667
chr20.307961	2.99324	0.0299461	-	utr3	Cpg_island	SOX12	NM_006943	6666	0	0	0	0	0	0	0	0	0	0	0	0.109589	0	0	0	0	0.04	0.103448	0	0
chr20.307988	4.80083	0.0282289	-	utr3	Cpg_island	SOX12	NM_006943	6666	0	0	0	0	0	0	0	0	0	0	0	0.111111	0	0	0	0.173913	0.166667	0	0	0
chr20.308142	-8.73456	0.0481929	+	utr3	Cpg_island	SOX12	NM_006943	6666	0.207547	0.285714	0	NA	0.139785	0.153846	0	0.176471	0.1875	0.0454545	0.26943	0.0869565	0	0	0.037037	0	0	0.133333	0.133333	0.0222222
chr20.308203	9.77065	0.0217247	-	utr3	Cpg_island	SOX12	NM_006943	6666	0.08	0.105263	0.178571	0	0.0512821	0.285714	NA	0	0	0.103448	0.0277778	0.310811	0.104167	0.25	0.22449	0.25	0	0.102041	0.153846	0.0652174
chr12.312414	-21.4569	0.0178666	-	promoter	North_shore	SLC6A12	NM_001122847;NM_001122848;NM_003044	6539	0.943396	0.736842	0.71875	0.428571	0.62963	NA	0.75	0.695652	0.272727	0.454545	0.714286	0.421569	0.625	NA	0.542373	0.220339	0.647059	0.444444	0.533333	0.285714
chr16.315540	16.2817	0.0378632	-	utr3	North_shelf	ITFG3	NM_032039	83986	0	0.285714	0.454545	0.4	0.428571	0.3	0	0.45098	0.363636	0.30303	0.464286	0.7375	0.568966	0.512195	0.224138	0.370968	0.580645	0.387097	0.44	0.606061
chr16.318688	-22.0033	0.0145113	-	utr3	Cpg_island	RGS11	NM_003834;NM_183337	8786	0.5	0.451613	0.454545	1	0.862069	0.666667	0	0.851852	0.72973	0.6	0.57377	0.430556	0.111111	0.5	0.285714	0.368421	0.571429	0.6	0.555556	0.333333
chr16.318733	18.0736	0.0489993	+	utr3	Cpg_island	RGS11	NM_003834;NM_183337	8786	0.541667	0.4	0.2	0	0	0.4	0	0	0	0.133333	0.5	0.245614	0.186441	0.333333	0.535714	0.323529	0.142857	0.266667	0.125	0.6
chr12.322642	18.8857	0.0495369	-	promoter	intercpg	SLC6A12	NM_001122847;NM_001122848;NM_003044	6539	0	0.1875	0	NA	0.619048	0.571429	NA	0.263158	0.5	0.526316	0.261538	0.454545	0.55102	0.529412	0.4	0.5625	0.473684	0.555556	0.538462	0.230769
chr16.324966	-16.4921	0.0378835	+	utr5	Cpg_island	RGS11	NM_003834;NM_183337	8786	NA	0.26087	0.73913	0.407407	0.287129	0.5	0.384615	0.285714	0.0714286	0.388889	0.58	0.172414	0.0689655	0.2	NA	0.272727	0	0.333333	0.410256	0.259259
chr16.326169	3.59242	0.0369251	+	promoter	Cpg_island	RGS11	NM_003834;NM_183337	8786	0	0	0	0.025641	0.0697674	0	0	0	0	0.0263158	0	0.0933333	0.0416667	0	0.117647	0	0.0625	0.0384615	0	0.0238095
chr16.326615	21.6831	0.0186013	+	promoter	South_shore	ARHGDIG	NM_001176	398	0.428571	0.4375	0.25	0.322581	0.333333	0.5	0	0	0.44	0.666667	0.318966	0.875	0.611111	0.190476	0.384615	0.468085	0.653846	0.692308	0.514286	0.548387
chr16.326673	3.77371	0.0280513	+	promoter	South_shore	ARHGDIG	NM_001176	398	0	0	0	0	0	0	0	0	0.04	0	0	0	0	0.142857	0	0	0	0.111111	0.0810811	0.0606061
chr20.327677	10.6521	0.00846501	-	utr5	Cpg_island	NRSN2	NM_024958	80023	0	0	0	0	0	0.0740741	NA	0	0	0	0	0.12	0	0	0.333333	0	0.0714286	0	0.25	0.148936
chr7.329696	4.77258	0.0156367	-	promoter	Cpg_island	LOC100288524	NM_001195127	100288524	0	0	0	0	0	0	0	NA	0	0	0	0.0675676	0	0	0.181818	0	0	0	0.0434783	0.0666667
chr7.329782	3.0962	0.042532	-	promoter	Cpg_island	LOC100288524	NM_001195127	100288524	0	0	0	0	0	0	0	NA	0	0	0	0.0757576	0	0	0	0	0	0.166667	0.0434783	0
chr7.329818	8.33847	0.0142798	-	promoter	Cpg_island	LOC100288524	NM_001195127	100288524	0	0	0	0	0.222222	0.0909091	0.0277778	0	0.0909091	0.0434783	0	0	0.0357143	0.185185	0.333333	0.0967742	0.0714286	0.0833333	0.166667	0.121212
chr7.329821	-4.49743	0.0281195	+	promoter	Cpg_island	LOC100288524	NM_001195127	100288524	0	0.0833333	0.117647	0	0	NA	NA	0	0.2	NA	0	0	0	0	0	0	0	0	0	0
chr7.330129	-2.92029	0.0374758	+	promoter	Cpg_island	LOC100288524	NM_001195127	100288524	0	0.111111	0	NA	0	0	0	0.133333	0	NA	0.0222222	0	0	0	0	0	0	0	0	0
chr4.330493	-10.1719	0.0177796	-	promoter	Cpg_island	ZNF141	NM_003441	7700	0	0	0	0	0	0	NA	0.117647	0.172414	0.142857	0.302632	0	0	0	0	0	0	0	0	0
chr4.330506	12.1706	0.0154288	+	promoter	Cpg_island	ZNF141	NM_003441	7700	0	0	NA	NA	0	0	0	0	0	NA	0	0.6	0	0.111111	NA	0	0	0	0.1	0.0666667
chr20.362092	-1.18733	0.0468401	+	utr5	Cpg_island	TRIB3	NM_021158	57761	0	0.0384615	0	0	0.0142857	0	0	0	0.0689655	0	0	0	0	0	0	0	0	0	0	0
chr11.381829	11.4538	0.0101571	-	utr3	South_shore	B4GALNT4	NM_178537	338707	0	0	0	0	0.153846	0.111111	0	0	0.0714286	0.1875	0.0338983	0.0481928	0.05	0.08	0.258065	0.125	0.0869565	0.16	0.178571	0.357143
chr11.381938	-20.8611	0.0408718	-	utr3	South_shore	B4GALNT4	NM_178537	338707	1	0.117647	0	0.6	0.384615	0.727273	0.263158	0.241379	0.6	0.333333	0.410256	0	0.08	0.117647	0.05	0.461538	0.464286	0.3	0.133333	0.32
chr11.381941	-21.0272	0.0312992	-	utr3	South_shore	B4GALNT4	NM_178537	338707	1	0.0588235	0	0.4	0.346154	0.181818	0	0.310345	0.55	0.133333	0.282051	0	0	0	0.05	0.461538	0.0357143	0	0	0.36
chr20.388133	-7.27579	0.0259747	+	promoter	North_shore	RBCK1	NM_031229;NM_006462	10616	0	0.0454545	0.0952381	NA	0.179487	0.133333	0	0.333333	0.0882353	0.0952381	0.144578	0.0322581	0.03125	0.037037	0	0.0185185	0.125	0	0.190476	0.133333
chr6.391529	10.4953	0.02185	+	promoter	Cpg_island	IRF4	NM_001195286;NR_036585;NM_002460	3662	0	0	0	0	0	0	NA	0	0	0	NA	0.166667	0	0	0	0.411765	0	NA	0.2	0
chr19.405720	15.3751	0.0201139	+	utr3	North_shore	C2CD4C	NM_001136263	126567	1	0.55	0.769231	NA	0.9	0.888889	0.875	0.826087	0.666667	0.75	0.588235	1	0.666667	0.736842	0.978261	1	NA	1	0.894737	0.925926
chr19.406561	21.9792	0.00381965	-	utr3	Cpg_island	C2CD4C	NM_001136263	126567	0.653846	0.448276	0.36	0.473684	0.534483	0.7	0.0833333	0.571429	0.357143	0.3125	0.542857	0.521739	0.777778	0.785714	0.75	0.769231	0.684211	0.5	0.666667	0.735294
chr19.407074	-11.5294	0.0350519	-	utr3	Cpg_island	C2CD4C	NM_001136263	126567	0.933333	1	0.888889	1	0.764706	1	1	1	1	0.809524	1	0.77551	0.744681	0.733333	1	0.78125	0.764706	0.833333	1	0.9375
chr11.409943	-19.3947	0.0163577	+	utr5	South_Shelf	SIGIRR	NM_001135054;NM_021805;NM_001135053	59307	0.966667	0.714286	0.666667	1	0.727273	0.8	1	0.7	0.444444	0.636364	0.771429	0.657143	0.740741	0.75	0.394737	0.333333	0.416667	0.678571	0.631579	0.684211
chr11.409944	-23.7992	0.0314112	-	utr5	South_Shelf	SIGIRR	NM_001135054;NM_021805;NM_001135053	59307	1	0.538462	0.333333	1	0.833333	1	1	1	0.818182	0.916667	0.666667	0.153846	0.8	1	0.571429	0.6	0.444444	0.571429	0.777778	0.714286
chr11.415440	-15.5759	0.0337289	-	promoter	North_shore	SIGIRR	NM_001135054;NM_021805;NM_001135053	59307	1	0.769231	0.833333	0.75	0.666667	0.642857	1	0.894737	0.866667	0.875	0.660714	0.682927	0.8	0.8	0.55102	0.578947	0.6	0.555556	0.615385	0.884615
chr11.417315	-3.00583	0.0302353	+	utr5	Cpg_island	SIGIRR	NM_001135054;NM_021805;NM_001135053	59307	0	0.111111	0.047619	NA	0.0869565	0	NA	0	0	0	0	0	0	0	NA	0	0	0	0	0
chr11.417536	1.19505	0.0428587	+	promoter	Cpg_island	SIGIRR	NM_001135054;NM_021805;NM_001135053	59307	0	0	0	0	0	0	0	0	0	0	0	0.0227273	0	0	0	0	0	0.0555556	0.04	0
chr11.417577	4.3886	0.00522579	-	promoter	Cpg_island	SIGIRR	NM_001135054;NM_021805;NM_001135053	59307	0	0	0	0	0	0	0	0	0	0	0.0224719	0.0697674	0	0.0434783	0	0.0444444	0.166667	0	0	0.0666667
chr11.418695	-9.32058	0.0266467	-	promoter	North_shore	SIGIRR	NM_001135054;NM_021805;NM_001135053	59307	1	0.916667	0.777778	1	0.901961	0.785714	NA	0.933333	0.818182	0.789474	0.983871	0.833333	NA	0.833333	0.830508	0.794872	0.903226	0.6	0.842105	0.92
chr17.419893	-7.23663	0.0198992	+	utr3	intercpg	VPS53	NM_001128159	55275	1	1	NA	1	1	NA	NA	1	1	1	1	1	0.8	1	1	0.892857	0.6	1	0.875	1
chr17.435583	8.16708	0.0273842	+	utr3	intercpg	VPS53	NM_018289;NM_001128159	55275	1	0.958333	0.666667	NA	0.75	1	NA	1	1	0.809524	0.947368	1	1	0.863636	1	1	1	1	0.952381	1
chr17.435794	17.6811	0.0268272	+	utr3	intercpg	VPS53	NM_018289;NM_001128159	55275	0.75	0.6	0.714286	0.3	0.875	0.4	NA	1	0.6	0.75	0.6	0.758621	0.666667	0.571429	0.930233	0.948718	0.833333	0.857143	0.823529	0.8
chr11.449904	0.875207	0.021568	+	promoter	North_shore	PTDSS2	NM_030783	81490	0	0	0	0	0	0	0	0	0	0	0	0.0227273	0	0.0243902	0	0	0.0227273	0	0	0
chr11.449962	3.30045	0.01493	+	promoter	Cpg_island	PTDSS2	NM_030783	81490	0	0	0	0	0	0	0	0	0	0	0	0.172185	0	0.0172414	0	0	0	0	0.0166667	0.0183486
chr11.450007	0.675794	0.0218549	+	promoter	Cpg_island	-	-	-	0	0	0	0	0	0	NA	0	0	0	0	0.015873	0	0	0.0183486	0	0	0	0	0
chr19.461689	3.10527	0.0382273	+	promoter	Cpg_island	SHC2	NM_012435	25759	0	0	0	NA	0	NA	NA	0	0	0	0	0.0652174	0	NA	0	0	0.0384615	0	0	0.0833333
chr19.461925	-1.75496	0.0192077	-	promoter	Cpg_island	SHC2	NM_012435	25759	0.2	0	0	NA	0	0	0	0	0.0416667	0.04	0.0171429	0	0	0	0	0	0	0	0	0
chr5.467021	-13.7599	0.0427818	+	utr3	South_shore	EXOC3	NM_007277	11336	0.62963	0.875	0.928571	1	1	NA	1	NA	0.888889	1	1	1	0.857143	0.8	1	0.75	0.75	0.571429	0.789474	0.7
chr4.468793	14.1863	0.00505406	+	promoter	South_shore	ABCA11P	NR_002451	79963	NA	1	0.918919	NA	0.878788	0.666667	0.772727	0.583333	0.666667	0.75	0.722222	0.882353	0.833333	0.902439	NA	0.912281	1	1	1	0.947368
chr16.475694	3.3872	0.0217034	+	utr5	Cpg_island	RAB11FIP3	NM_014700	9727	0	0	0	0	0	0	0	0	0	0	0	0.0434783	0	0	0	0	0	0.285714	0.0714286	0
chr4.491363	14.3184	0.0186677	+	promoter	North_shore	PIGG	NM_017733;NM_001127178	54872	0.869565	0.9	0.933333	0	0.888889	NA	0.65	1	1	1	0.875	0.951807	0.818182	1	1	1	1	1	1	1
chr4.491682	2.30194	0.0344555	-	promoter	North_shore	PIGG	NM_017733;NM_001127178	54872	1	NA	0.9	1	0.9375	1	1	1	1	0.928571	1	1	1	1	1	1	1	1	1	1
chr4.493148	0.585229	0.0353322	+	promoter	Cpg_island	PIGG	NM_017733;NM_001127178	54872	0	0	0	0	0	0	0	0	0	0	0	0.0192308	0	0	0	0	0	0	0	0.0133333
chr4.493161	0.536721	0.0387762	-	promoter	Cpg_island	PIGG	NM_017733;NM_001127178	54872	0	0	0	0	0	0	0	0	0	0	0	0	0	0.027027	0	0	0	0	0.0204082	0.0149254
chr11.494657	4.64171	0.00359713	+	utr3	North_shore	RNH1	NM_203388;NM_203385;NM_203384;NM_203383;NM_002939;NM_203387;NM_203389;NM_203386	6050	1	0.933333	0.916667	1	0.978723	0.888889	NA	1	1	0.8	0.931034	1	1	1	1	1	1	1	1	1
chr8.495179	4.69739	0.0301851	-	promoter	Cpg_island	C8orf42	NM_175075	157695	0	0	0	0	0	0	0	0	0	0	0	0.176471	0	0	0	0.0555556	0	0.153846	0	0
chr8.495970	1.33384	0.0356197	-	promoter	Cpg_island	C8orf42	NM_175075	157695	0	0	0	0	0	0	0	0	0	0	0	0	0	0.05	0	0	0.0588235	0.0294118	0	0
chr19.496219	6.84493	0.011721	-	promoter	Cpg_island	MADCAM1	NM_130760;NM_130762	8174	0	0.0416667	0	NA	0	NA	0	0	0	0	NA	0.0652174	0	0.2	0	0.0555556	0.217391	0.142857	0	0.08
chr19.496234	-8.56879	0.0438377	-	promoter	Cpg_island	MADCAM1	NM_130760;NM_130762	8174	0.297297	0.137931	0	0.833333	0	0.105263	NA	0	0.130435	0.0322581	0.0454545	0.0545455	0	0	0	0	0	0.05	0	0.0588235
chr18.502048	17.8721	0.0272236	+	promoter	South_shore	COLEC12	NM_130386	81035	0.142857	0.722222	0.461538	0	0.745455	0.909091	1	0.75	0.7	0.666667	0.54878	0.770833	0.947368	0.777778	1	0.886792	0.818182	0.666667	0.692308	0.722222
chr11.507633	-17.2761	0.00505716	+	promoter	Cpg_island	C19orf20	NM_033513	91978	0.6	0.0869565	0	0.181818	0.05	0.111111	0.666667	0	0.181818	0.2	0.220779	0	0	0	0	0	0.0666667	0	0	0.117647
chr11.507639	-6.55072	0.0276945	-	promoter	Cpg_island	RNH1	NM_203388;NM_203385;NM_203384;NM_203383;NM_002939;NM_203387;NM_203389;NM_203386	6050	0.411765	0.0357143	0.25	0	0	0	0	0.1	0	0	0	0	0	0	0	0	0	0	0	0
chr5.524465	3.2553	0.00570721	+	utr5	Cpg_island	SLC9A3	NM_004174	6550	0	0	0	0	0	0	0	0	0	0	0	0	0	0.0689655	0	0.05	0	0.0833333	0	0.0909091
chr5.524654	1.35304	0.0494656	-	promoter	Cpg_island	SLC9A3	NM_004174	6550	0	0	0	0	0	0	0	0	0	0	0	0.0434783	0	0	0	0	0	0	0.0555556	0
chr5.524822	4.71419	0.0243902	-	promoter	Cpg_island	SLC9A3	NM_004174	6550	0	0	0	0	0	0	0	0	0	0	0	0.0588235	0	0	0.4	0.0421053	0	0	0	0
chr5.524848	3.19809	0.0380029	+	promoter	Cpg_island	SLC9A3	NM_004174	6550	0	0	0	0	0	0	0	0	0	0	0	0	0	0	0	0	0.205882	0.0555556	0.0227273	0
chr19.530750	11.5371	0.034333	+	promoter	North_shore	CDC34	NM_004359	997	0.0857143	0.166667	0.363636	0.135135	0.0444444	0.142857	0.1	0	0	0.0833333	0	0.104167	0.125	0.375	0.276923	0.413793	0.111111	0.111111	0.230769	0.0454545
chr11.532733	-19.2397	0.0395906	-	utr3	North_shore	LRRC56	NM_198075	115399	NA	0.5	0.388889	0.888889	0.454545	0.857143	0.857143	0.6	0.818182	0.571429	0.652174	0.416667	0.25	0.482759	0.645161	0.459459	0.333333	0.0714286	0.733333	0.655172
chr11.536702	-39.213	0.000358866	+	promoter	Cpg_island	LRRC56	NM_198075	115399	NA	0.6	0.857143	1	NA	0.625	1	1	NA	0.777778	0.833333	0.26087	0.6	0.857143	0.321429	0.5	0.5	0.454545	0.4	0.384615
chr11.536878	9.16541	0.00205393	+	promoter	Cpg_island	LRRC56	NM_198075	115399	0	0	0	0	0	0	0	0	0	0	0	0.272727	0.04	0.117647	0.307692	0.0882353	0	0.0555556	0	0
chr11.536963	7.62885	0.0230542	+	promoter	Cpg_island	LRRC56	NM_198075	115399	0	0	0	0	0.0327869	0	0	0	0.0769231	0.148148	0	0.05	0.0533333	0.0588235	0.307692	0.241379	0.133333	0	0.125	0
chr11.536996	8.50302	0.0117492	+	promoter	Cpg_island	LRRC56	NM_198075	115399	0	0	0	0	0	0	0	0	0	0.0344828	0	0.325	0.0135135	0.0588235	0.384615	0.0689655	0.0967742	0	0	0
chr11.537542	16.6756	0.00241514	-	promoter	Cpg_island	HRAS	NM_005343;NM_176795;NM_001130442	3265	0	0.0425532	0.272727	NA	0.0454545	0	0	0	0.230769	0	0	0.29703	0.380952	0.285714	0.226415	0.0322581	0.170213	0.0555556	0.146341	0.222222
chr11.537558	10.0329	0.0319774	+	utr5	Cpg_island	RAB11FIP3	NM_014700;NM_001142272	9727	0.0108696	0.176471	0.0555556	0	0.05	0.285714	0	0	0.22549	0.2	0.0625	0.145161	0.222222	0.225806	0.2	0.24	0.0222222	0.0925926	0.155556	0.25
chr19.541869	-9.50211	0.0431327	+	utr3	Cpg_island	GZMM	NM_005317	3004	1	0.833333	0.7	1	1	0.666667	NA	1	0.95	0.875	0.926174	0.836066	0.857143	0.848485	0.983333	0.869565	0.785714	0.933333	0.611111	0.774194
chr19.541881	-19.6471	0.0386277	-	utr3	Cpg_island	GZMM	NM_005317	3004	0.642857	0.666667	0.666667	1	0.645161	0.909091	1	1	0.857143	0.583333	0.895522	0.829787	0.777778	0.208333	0.227273	0.580645	0.9	0.6	0.791667	0.705882
chr19.541952	9.05288	0.026232	-	utr3	Cpg_island	CDC34	NM_004359	997	1	0.875	0.916667	0.347826	0.9	1	1	1	0.857143	0.916667	1	1	1	1	1	1	1	0.933333	1	1
chr19.547312	-20.536	0.0201376	+	utr5	North_shelf	GZMM	NM_005317	3004	1	NA	0.5	0.774194	0.882353	NA	NA	1	0.8	0.9	1	0.613636	0.854167	0.909091	0.142857	0.56	0.666667	0.777778	0.846154	0.625
chr11.554791	-9.23788	0.0424329	-	utr3	Cpg_island	LRRC56	NM_198075	115399	0.204545	0.0779221	0.16	0.151515	0.0714286	0	0.8	0	0.0416667	0	0.22549	0.0412371	0.05	0	0	0.0208333	0	0	0	0.15
chr11.554961	3.41899	0.0139115	+	utr3	Cpg_island	C11orf35	NM_173573	256329	0	0	0	0	0	0	0	0	0	0	0	0.0961538	0	0.133333	0	0.0454545	0	0	0	0
chr7.560297	-17.1102	0.0400813	-	promoter	Cpg_island	PDGFA	NM_033023;NM_002607	5154	0.322581	0.380952	0.454545	0.571429	0.478261	0.666667	1	0.8	0.409091	0.15	0.468085	0.387097	0.333333	0.37037	0.473684	0.117647	0.304348	0	0.277778	0.545455
chr7.561399	3.71307	0.049698	+	promoter	Cpg_island	FLJ44511	NR_033963	441307	0	0	0	0	0	0	NA	0	NA	0	0	0.05	0	0	0.142857	0	0	0	0	0.0909091
chr11.561535	-4.30672	0.0129841	-	promoter	South_shore	C11orf35	NM_173573	256329	0.137931	0.1	0	NA	0	0	0	0	0.0909091	0	0.1	0	0	0	0	0	0	0	0	0
chr19.570274	19.2673	0.0273548	+	promoter	North_shelf	BSG	NM_198591;NM_198589;NM_001728	682	0.6	0.470588	0.5	NA	0.45098	0.4	0.375	0.285714	0.44	0.428571	0.03125	0.482759	0.487805	0.52381	0.828571	0.695652	0.571429	0.210526	0.521739	0.75
chr19.570450	15.791	0.0448333	+	promoter	North_shore	BSG	NM_198591;NM_198589;NM_001728	682	NA	0.625	0.583333	NA	0.307692	0.571429	NA	0.631579	0.666667	0.666667	0.703704	0.733333	0.714286	0.846154	0.870968	0.444444	1	0.538462	NA	1
chr19.572620	2.29637	0.0285385	+	utr5	Cpg_island	BSG	NM_198591;NM_198589;NM_001728	682	0	0	0	0	0	0	0	0	0	0	0.0121951	0.0526316	0	0.0666667	0	0	0	0	0.117647	0
chr19.577926	-13.5608	0.0245191	-	utr5	Cpg_island	DIP2C	NM_014974	22982	1	0.954545	1	1	0.846154	1	1	0.888889	0.705882	0.75	0.967213	0.962963	NA	0.714286	0.421053	0.875	0.833333	0.818182	0.916667	0.783784
chr16.578667	12.9997	0.0194836	+	promoter	South_shore	SOLH	NM_005632	6650	NA	0	0	NA	0.0461538	0	NA	0	0	0	0	0.454545	0	0.142857	0	0.444444	0	0.166667	0.166667	0
chr18.580228	-13.8985	0.0128795	+	promoter	Cpg_island	CETN1	NM_004066	1068	1	0.84	0.923077	0.705882	0.948718	0.9	1	1	0.970588	0.881356	0.804878	0.837209	0.75	0.833333	0.552	0.695238	0.830508	0.708333	0.877551	0.942857
chr19.588571	10.3793	0.0244157	-	promoter	Cpg_island	HCN2	NM_001194	610	0	0.0909091	0	NA	0.037037	0	0	0.318182	0	0	0	0.0526316	0.142857	0.0555556	0	0.208333	0.0625	0.2	0.111111	0.375
chr19.588728	-10.679	0.00177878	-	promoter	North_shore	HCN2	NM_001194	610	NA	0	0.333333	NA	0.142857	0	NA	0.0909091	0.0526316	0	0.166667	0	0	0	NA	0	0	0	0	0
chr19.588783	3.40852	0.0477998	-	promoter	North_shore	MIR3176	NR_036137	100423037	0	0	0	NA	0	0	0	0	0	0	0	0	0	0.0769231	0	0.03125	0	0	0.25	0
chr7.588914	16.1575	0.00703604	+	utr3	Cpg_island	HCN2	NM_001194	610	1	0.777778	0.923077	0.555556	0.580645	0.571429	0.928571	0.933333	0.736842	0.826087	0.658537	1	0.921053	0.9	1	1	0.928571	1	0.789474	0.84
chr7.588986	-9.69682	0.012186	+	utr3	Cpg_island	PRKAR1B	NM_001164761;NM_001164760;NM_001164759;NM_001164762;NM_002735;NM_001164758	5575	1	1	0.857143	1	0.931034	NA	1	1	0.904762	0.954545	1	0.846154	0.882353	1	1	0.68	0.888889	0.923077	0.9	0.869565
chr7.589019	-12.4228	0.00772849	+	utr3	Cpg_island	PRKAR1B	NM_001164761;NM_001164760;NM_001164759;NM_001164762;NM_002735;NM_001164758	5575	1	1	0.714286	1	0.964286	NA	1	0.928571	0.863636	0.958333	1	0.846154	0.823529	0.764706	1	0.71875	0.888889	0.875	1	0.777778
chr7.589039	11.4883	0.0139519	+	utr3	Cpg_island	PRKAR1B	NM_001164761;NM_001164760;NM_001164759;NM_001164762;NM_002735;NM_001164758	5575	0	0	0	0	0	NA	0	0	0	0	0	0.461538	0	0	0.2	0.255814	0	0.0588235	0	0
chr7.589384	-18.6477	0.00163614	+	utr3	Cpg_island	PRKAR1B	NM_001164761;NM_001164760;NM_001164759;NM_001164762;NM_002735;NM_001164758	5575	1	1	1	NA	0.944444	NA	NA	0.75	1	1	1	0.8125	0.777778	0.933333	1	0.716667	0.538462	0.846154	0.846154	0.642857
chr19.589639	1.27364	0.0447467	-	promoter	Cpg_island	HCN2	NM_001194	610	0	0	0	NA	0	0	0	0	0	0	0	0.0454545	0.0120482	0.0384615	0	0	0	0	0	0
chr19.589700	1.95446	0.0321488	+	promoter	Cpg_island	HCN2	NM_001194	610	0	0	0	0	0	0	NA	0	0	0	0	0.0555556	0.025641	0	0	0	0.0714286	0	0	0
chr19.589728	1.27152	0.0442329	-	promoter	Cpg_island	HCN2	NM_001194	610	0	0	0	NA	0	0	0	0	0	0	0	0.045977	0.0120482	0	0	0	0	0.0344828	0	0
chr20.591080	2.75368	0.0333369	+	promoter	Cpg_island	SHOX	NM_006883;NM_000451	6473	0	0	0	0	0	NA	0	0	0	0	0	0	0	0	0	0	0	0.0555556	0.1	0.133333
chr20.591086	2.51374	0.0190764	-	promoter	Cpg_island	TCF15	NM_004609	6939	0	0	0	0	0	0	0	0	0	0	0	0.0638298	0.0909091	0	0	0	0	0	0.0454545	0
chr16.591410	7.66202	0.045734	+	promoter	Cpg_island	SOLH	NM_005632	6650	0.944444	1	1	0.444444	1	0.806452	1	0.962963	0.866667	0.887324	0.954023	1	1	0.916667	1	1	1	0.833333	1	1
chrX.591565	7.02911	0.0491674	+	utr5	Cpg_island	SHOX	NM_006883;NM_000451	6473	0	0	0	0	0	0	NA	0	0	0.0454545	0	0.178571	0	0	0.214286	0	0	0.125	0	0.315789
chrX.591574	5.93119	0.0112571	+	utr5	Cpg_island	SHOX	NM_006883;NM_000451	6473	0	0	0	0	0	0	NA	0	0	0	0	0.178571	0.0222222	0.0526316	0.214286	0	0	0	0	0
chrX.591576	7.77911	0.0274363	+	utr5	Cpg_island	SHOX	NM_006883;NM_000451	6473	0	0	0	0	0	0	NA	0	0	0	0	0.178571	0	0	0.214286	0	0	0	0	0.315789
chr18.597088	5.57047	0.0480321	-	utr5	intercpg	CLUL1	NM_014410	27098	0	0	0	NA	0.104167	0	0	0.0645161	0.04	0.0869565	0	0.142857	0.0909091	0	0	0.134615	0	0.0952381	0.0869565	0.111111
chr16.604189	7.10679	0.0253809	-	utr3	North_shore	SOLH	NM_005632	6650	0	0	0	NA	0	0	0	0	0	NA	0	0.222222	0	NA	0	0	0.2	0	0	0.111111
chrX.605415	-1.53497	0.00883599	-	utr3	Cpg_island	SHOX	NM_006883;NM_000451	6473	0	0	0	0	0.012987	0.0909091	0	0.0384615	0	0	0.0243902	0	0	0	0	0	0	0	0	0
chrX.605433	-2.32683	0.00729723	-	utr3	Cpg_island	SHOX	NM_006883;NM_000451	6473	0	0.0357143	0	0	0.0789474	0	0	0	0	0.0333333	0.0245399	0	0	0	0	0	0	0	0	0
chrX.605435	-2.01009	0.00300635	-	utr3	Cpg_island	SHOX	NM_006883;NM_000451	6473	0	0.0877193	0	0	0.0135135	0	0	0.04	0	0.0377358	0.022082	0	0	0	0	0	0	0	0	0
chrX.605452	-2.83904	0.00583404	-	utr3	Cpg_island	SHOX	NM_006883;NM_000451	6473	0	0.0909091	0	0	0.0933333	0	0	0.04	0.0181818	0.0344828	0.0251572	0	0	0	0	0	0	0.016129	0	0
chrX.605468	-2.84852	0.000827113	-	utr3	Cpg_island	SHOX	NM_006883;NM_000451	6473	0	0.0344828	0	0	0.0519481	0	0	0.0384615	0	0.1	0.0243902	0	0	0	0	0	0	0	0	0
chrX.605470	-1.31615	0.0141384	-	utr3	Cpg_island	SHOX	NM_006883;NM_000451	6473	0	0	0	0	0.012987	0	0	0.0384615	0	0	0.0243902	0	0	0	0	0	0	0	0	0
chrX.605477	-1.95835	0.0325039	-	utr3	Cpg_island	SHOX	NM_006883;NM_000451	6473	0	0	0	0	0.0909091	0	0	0.0384615	0	0	0.0243902	0	0	0	0	0	0	0	0	0
chrX.606014	4.90842	0.0395422	+	utr3	South_shore	PHRF1	NM_020901	57661	0.163934	0	0	0	0.045977	0	0	0	0	0	0	0.0434783	0.0114943	0.191489	0	0.0178571	0.0566038	0.0697674	0.0983607	0
chr5.612707	0.892298	0.0410996	-	promoter	Cpg_island	CEP72	NM_018140	55722	0	0	0	0	0	0	0	0	0	0	0	0.0298507	0	0.0238095	0	0	0	0	0	0
chr11.615334	11.8017	0.019495	+	utr5	Cpg_island	IRF7	NM_004031;NM_004029;NM_001572	3665	0	0.125	0	0	0.0833333	0.111111	NA	0	0	0	0.02	0.243243	0.375	0.333333	0.0526316	0.277778	0	NA	0	0
chr11.615699	-1.95194	0.016814	+	utr5	Cpg_island	IRF7	NM_004031;NM_004029;NM_001572	3665	0	0.0606061	0	0	0.028169	0.1	NA	0.03125	0	0	0	0	0	0	0	0	0	0	0	0
chr11.615721	-1.64935	0.038277	+	utr5	Cpg_island	IRF7	NM_004031;NM_004029;NM_001572	3665	0	0.0588235	0	0	0.0277778	0.1	NA	0	0	0	0	0	0	0	0	0	0	0	0	0
chr11.615732	-1.64935	0.038277	+	promoter	Cpg_island	IRF7	NM_004031;NM_004029;NM_001572	3665	0	0.0588235	0	0	0.0277778	0.1	NA	0	0	0	0	0	0	0	0	0	0	0	0	0
chr11.615743	-3.30759	0.0477969	+	promoter	Cpg_island	IRF7	NM_004031;NM_004029;NM_001572	3665	0	0.235294	0	0	0.0277778	0.1	NA	0	0	0	0	0	0	0	0	0	0	0	0	0
chr11.615872	-4.5447	0.0149535	+	promoter	Cpg_island	IRF7	NM_004031;NM_004029;NM_001572	3665	0	0.0714286	0	NA	0	0.2	NA	0	0.0666667	0	0	0	NA	0	0	0	0	0	0	0
chr11.616351	-16.2633	0.0137597	-	promoter	North_shore	IRF7	NM_004031;NM_004029;NM_001572	3665	0.375	0.263158	0.125	0.5	0.0689655	0.363636	0.342105	0	0.130435	0.0571429	0.312	0.0689655	0	0.214286	0	0.205882	0	0.0666667	0.266667	0
chr19.616568	-20.8103	0.0410131	+	utr3	Cpg_island	HCN2	NM_001194	610	0.833333	0.363636	0.1	0.25	0.15	0.555556	0.5	0.625	0.454545	0.25	0.736842	0.3125	0.2	0	0.666667	0.1	NA	0.166667	0.285714	0.166667
chr19.616586	28.7901	0.00983788	-	utr3	Cpg_island	HCN2	NM_001194	610	0.105263	0.428571	0	0	0	0	0	0.0625	0.214286	0.428571	0.452381	0.588235	0.285714	0.421053	1	0.384615	0.111111	0.5	0.285714	0.296296
chr19.616590	-15.2082	0.038599	+	utr3	Cpg_island	HCN2	NM_001194	610	0.222222	0.363636	0.6	0	0.358974	0.555556	0.5	0.4375	0.454545	0.451613	0.473684	0.34375	0.727273	0.0952381	0.444444	0.1	0.25	0.173913	0.142857	0.166667
chr16.616838	13.9473	0.0336335	+	promoter	South_shore	PIGQ	NM_148920;NM_004204	9091	0.222222	0.538462	0.857143	0.454545	0.5625	0.5	NA	0.705882	0.47619	0.608696	0.355556	0.73913	0.448276	0.5	1	0.625	0.68	0.7	0.625	0.7
chr11.616913	-13.3867	0.0353949	+	promoter	North_shore	CDHR5	NM_031264;NM_001171968;NM_021924	53841	0.894737	0.833333	1	1	0.675676	1	1	1	0.764706	0.75	0.928571	0.852941	0.458333	0.839286	0.764706	0.71875	0.916667	0.678571	0.758621	0.969697
chr16.617810	11.1502	0.0243413	+	utr5	North_shore	NHLRC4	NM_176677	283948	0.631579	0.846154	1	0.759259	0.931034	1	NA	1	0.777778	0.85	0.733333	1	0.958333	1	1	0.824561	0.947368	0.909091	1	0.964286
chr17.618045	4.11692	0.0320793	-	utr5	Cpg_island	VPS53	NM_018289;NM_001128159	55275	0	0	0	0	0	0	0	0	0	0	0	0.134615	0	0	0	0.0333333	0.25	0	0	0
chr17.618342	1.47664	0.034307	-	promoter	Cpg_island	VPS53	NM_018289;NM_001128159	55275	0	0	0	0	0	0	0	0	0	0	0	0.0425532	0	0	0	0.0588235	0	0	0	0
chr17.618947	-8.51455	0.0374121	-	promoter	South_shore	VPS53	NM_018289;NM_001128159	55275	0	0	0	0.590909	0.2	0.1	0	0	0	0.0555556	0	0	NA	0	0	0	0	0	0	0
chr4.619314	13.9726	0.0144289	+	promoter	North_shore	PDE6B	NM_001145291;NM_000283	5158	0.264706	0.173913	0.166667	0	0.25	0.0714286	0.0952381	0	0.384615	0.172414	0.0540541	0.307692	0.234043	0.428571	0.323529	0.2	0.411765	0.0588235	0.28125	0.294118
chr11.624996	-28.6802	0.0185301	-	utr5	Cpg_island	CDHR5	NM_031264;NM_001171968;NM_021924	53841	1	0.333333	0.866667	1	0.526316	0.6	0.631579	NA	NA	0.3125	0.833333	0.642857	0.611111	0.5	0.533333	0.357143	0.142857	0.230769	0.454545	0.375
chr11.624999	-21.8922	0.0359829	-	utr5	Cpg_island	CDHR5	NM_031264;NM_001171968;NM_021924	53841	1	0.555556	0.6	1	0.789474	0.8	0.631579	NA	NA	0.875	1	0.682927	0.777778	0.7	0.266667	0.357143	0.428571	0.642857	0.8	1
chr11.626617	19.0605	0.0428572	-	promoter	North_shore	CDHR5	NM_031264;NM_001171968;NM_021924	53841	NA	0.25	0.4	0.428571	0.928571	0.285714	0.5	0.571429	0.555556	0.5	0.351852	0.914894	0.333333	0.5	0.833333	0.681818	0.6	NA	0.7	0.65
chr11.626624	4.80632	0.025406	+	promoter	North_shore	SCT	NM_021920	6343	0	0	0	0	0	0	NA	0	0.047619	0	0	0.0967742	0.0769231	0	0.175439	0	0.0416667	0	0.047619	0
chr11.626965	4.30821	0.0149806	+	promoter	Cpg_island	SCT	NM_021920	6343	0	0	0	0	0	0	NA	0	0	0	0	0	0.0625	0	NA	0	0	0.0833333	0.0714286	0.08
chr11.627153	6.92141	0.0499557	-	utr5	Cpg_island	SCT	NM_021920	6343	0	0	0	0	0	0	0	0.05	0.0666667	0	0	0.194444	0	0.2	0	0	0.235294	0	0.0909091	0.125
chr11.627270	14.7912	0.00054505	+	promoter	Cpg_island	CDHR5	NM_031264;NM_001171968;NM_021924	53841	NA	0	0	NA	0	0	0	NA	0	0	0	0.142857	0.166667	0.1	0	0.333333	0	NA	0.2	0.0909091
chr11.627285	14.686	0.0355819	+	promoter	Cpg_island	CDHR5	NM_031264;NM_001171968;NM_021924	53841	NA	0	0	NA	0	0.142857	0	NA	0.125	0	0	0.357143	0.333333	0.2	0	0.388889	0	NA	0.2	0
chr11.627368	-24.491	0.015365	+	promoter	Cpg_island	CDHR5	NM_031264;NM_001171968;NM_021924	53841	0.769231	0.0555556	NA	NA	0.0909091	0.333333	1	0	0.1	0.0769231	0.275	0	0.222222	0	0	0	0	0	0.105263	0
chr11.628123	-11.4253	0.0477572	+	promoter	South_shore	SCT	NM_021920	6343	1	1	0.882353	NA	0.888889	NA	1	0.964286	1	0.95	1	1	1	0.833333	0.681818	0.5	1	0.6875	0.947368	0.777778
chr11.628127	-6.89701	0.0242388	-	promoter	South_shore	SCT	NM_021920	6343	NA	0.933333	1	1	0.962963	0.9	NA	1	1	1	1	0.862745	0.8	0.8	1	0.857143	1	0.833333	0.9375	0.944444
chr16.633986	-22.354	0.0093505	-	utr3	Cpg_island	PIGQ	NM_148920;NM_004204	9091	NA	0.6	1	1	0.705882	0.8	0.608696	0.533333	0.7	0.857143	0.826087	0.578947	0.428571	NA	0.545455	0.7	0.375	0.333333	0.4375	1
chr20.634053	1.33152	0.0345065	-	promoter	Cpg_island	PRKAR1B	NM_001164761;NM_001164760;NM_001164759;NM_001164762;NM_002735;NM_001164758	5575	0	0	0	0	0	0	0	0	0	0	0	0.0217391	0.142857	0	0	0.0178571	0	0	0	0
chr17.635438	0.991489	0.0446645	-	promoter	Cpg_island	FAM57A	NM_024792	79850	0	0	0	0	0	0	0	0	0	0	0	0.027027	0	0	0	0	0	0	0.05	0
chr16.639325	0.760888	0.0313863	+	promoter	Cpg_island	RAB40C	NM_001172666;NM_001172665;NM_001172663;NM_001172664;NM_021168	57799	0	0	0	NA	0	0	0	0	0	0	0	0.0224719	0	0	0	0.0192308	0	0	0	0
chr19.639649	2.57802	0.0327527	-	promoter	Cpg_island	FGF22	NM_020637	27006	0	0	0	0	0	0	0	0	0	0	0	0	0	0	0	0	0	0.0869565	0.05	0.0857143
chr20.642756	13.1808	0.046851	+	utr3	Cpg_island	SCRT2	NM_033129	85508	0.213115	0	0.131579	0	0.212121	0.0833333	0	0	0.232558	0.216216	0.328767	0.430108	0.2	0.206897	0.380952	0.108108	0.333333	0.0769231	0.235294	0.129032
chr20.644222	-3.05474	0.04904	-	utr3	Cpg_island	SCRT2	NM_033129	85508	0	0.1	0	0	0	0	NA	0	0.0909091	0.125	0	0	NA	0	0	0	0	0	0	0
chr17.655882	1.97232	0.0345187	-	promoter	Cpg_island	GEMIN4	NM_015721	50628	0	0	0	0	0	0	0	0	0	0	0	0.0902256	0.0111111	0	0	0	0	0	0.0238095	0
chr17.655884	2.25752	0.0265889	+	promoter	Cpg_island	DBIL5P	NR_024120	-	0	0	0	0	0	NA	0	0	0	0	0	0.0483871	0	0.0714286	0	0	0	0	0	0
chr6.656821	5.71428	0.0404086	+	utr5	Cpg_island	EXOC2	NM_018303	55770	1	0.944444	0.9	NA	0.95	0.933333	NA	0.666667	0.958333	0.952381	0.949153	1	0.966667	0.96	1	1	1	1	0.818182	1
chr6.656873	9.02381	0.00450215	+	utr5	Cpg_island	EXOC2	NM_018303	55770	1	0.967742	0.8	NA	0.891892	1	NA	0.809524	0.909091	0.904762	0.864407	0.904762	1	1	1	1	1	1	1	1
chr6.656885	13.2209	0.0214369	-	utr5	Cpg_island	EXOC2	NM_018303	55770	0.666667	0.904762	0.857143	1	1	1	0	1	0.933333	0.956522	0.959459	1	1	1	1	1	1	NA	0.941176	1
chr6.656934	-5.49958	0.022439	+	utr5	Cpg_island	HUS1B	NM_148959	135458	1	0.92	1	1	1	1	1	1	0.954545	1	1	1	0.888889	0.909091	1	0.854167	0.875	1	1	0.875
chr6.657088	-5.56474	0.0358348	-	promoter	Cpg_island	HUS1B	NM_148959	135458	1	0.833333	1	1	0.96	1	1	0.90625	1	0.939394	1	0.901961	1	0.571429	0.881356	0.888889	0.933333	1	1	1
chr17.657337	10.6113	0.00282632	+	promoter	South_shore	GEMIN4	NM_015721	50628	0	0.0909091	0	0	0	0	NA	0	0.0434783	0	0.00925926	0.303371	0.0545455	0.0606061	0.22093	0.116279	0	0.222222	0.0625	0.0625
chr5.662581	7.98534	0.0186309	-	utr3	Cpg_island	LOC100133331	NR_028327	100133331	0.954545	0.947368	0.7	1	1	NA	0.75	1	0.9375	0.769231	0.875	1	1	1	1	0.97561	1	0.928571	0.952381	0.888889
chr5.662617	5.61771	0.00468839	-	utr3	Cpg_island	TPPP	NM_007030	11076	1	0.833333	1	1	0.954545	NA	1	0.857143	0.875	1	0.916667	1	1	1	1	1	1	0.923077	1	1
chr5.664375	-10.9676	0.0354522	+	utr3	North_shore	TPPP	NM_007030	11076	1	0.942857	1	1	1	0.8	0.8	1	1	1	1	1	0.789474	0.75	1	0.714286	0.947368	NA	0.870968	0.857143
chr5.664414	21.2956	0.0430909	+	utr3	North_shore	TPPP	NM_007030	11076	0.902439	0.5	0.72	0	0.682927	0.285714	0.117647	0.318182	0.565217	0.517241	0.425532	0.689189	0.709677	0.526316	0.967033	0.754386	0.4	0.875	0.484848	0.72
chr5.664528	-15.3867	0.0463693	+	utr3	North_shore	TPPP	NM_007030	11076	0.350877	0.596154	0.4	1	0.480769	0.692308	0.818182	0.628571	0.571429	0.581395	0.858156	0.447059	0.404762	0.586207	0.387324	0.232143	0.423077	0.6	0.6	0.612245
chr5.665200	18.7948	0.0147435	-	utr3	Cpg_island	TPPP	NM_007030	11076	NA	0.833333	1	0.375	1	0.9	NA	0.25	0.916667	0.714286	0.983871	1	0.833333	1	1	1	1	NA	1	1
chr4.666255	-11.5414	0.00254161	+	utr3	North_shore	ATP5I	NR_033743;NM_007100	521	1	1	1	1	1	0.8	1	1	1	1	1	0.891089	0.764706	1	0.75	0.969697	1	0.714286	1	0.809524
chr19.674537	4.38996	0.0419367	+	promoter	North_shore	FSTL3	NM_005860	10272	0	0	0	0	0	0	0	0	0	0	0	0.205128	0	0	0.0526316	0	0	0	0.0769231	0
chr19.674548	18.2483	0.0305984	+	promoter	North_shore	FSTL3	NM_005860	10272	0.5	0.352941	0.133333	NA	0.484848	0.5	0.56	0.45	0.666667	0.533333	0.456522	0.489362	0.73913	0.583333	1	0.564516	0.6	0.368421	0.555556	0.833333
chr19.675845	-11.8213	0.00884483	-	promoter	Cpg_island	FSTL3	NM_005860	10272	0.333333	0	NA	0	0.0769231	0.166667	0.384615	NA	0.117647	NA	0	0	0	0	0	0	0	0	0	0
chr16.679531	17.4242	0.0482312	-	promoter	South_shore	WFIKKN1	NM_053284	117166	0.277778	0.257143	0.5	0.306122	0.230769	0.428571	1	0.363636	0.5	0.555556	0.629921	0.702703	0.545455	0.642857	0.849057	0.653846	0.230769	0.709677	0.548387	0.763158
chr16.680335	-19.2581	0.0203263	+	promoter	North_shelf	MFSD7	NM_032219	84179	0.72	0.166667	0.4	0	0.111111	0.285714	NA	0.25	0.181818	0.222222	0.547619	0	0.115385	0.05	0	0.181818	0	0.0909091	0.166667	0
chr8.681730	13.1833	0.0492563	+	promoter	Cpg_island	ERICH1	NM_207332	157697	NA	0.2	NA	0	0	0	NA	0.238095	0.111111	0	0.0384615	0.3	0.105263	0	0.125	0.105263	0.125	0.133333	0.571429	0.481481
chr19.681854	16.7287	0.000473208	-	utr3	South_shore	FSTL3	NM_005860	10272	0.8	0.75	0.818182	NA	0.703704	0.4	NA	0.666667	0.904762	0.961538	0.869565	1	0.95	0.785714	1	0.947368	1	0.956522	1	0.928571
chr19.681892	12.7569	3.92e-05	+	utr3	South_shore	FSTL3	NM_005860	10272	0	0	0	NA	0.0606061	0	0	0	0.025641	0.0263158	0	0.238636	0.166667	0.136364	0	0.130435	0.111111	0.129032	0.125	0.125
chr19.683035	13.4965	0.00746049	+	utr3	South_shore	FSTL3	NM_005860	10272	NA	0.166667	0.105263	0	0.0526316	0	0	0.0769231	0	0.181818	0.0869565	0.212121	0.181818	0	0	0.361111	0.222222	0	0.333333	0.230769
chr16.684522	12.4761	0.0336774	+	utr3	Cpg_island	C16orf13	NM_001040162;NM_001040165;NM_001040160;NM_001040161;NM_032366	84326	0.342857	0.117647	0.266667	0.0952381	0.192308	0.368421	0.0909091	0.186047	0.0714286	0.304348	0.163934	0.516667	0.333333	0.277778	0.333333	0.512821	0.206897	0.111111	0.148148	0.454545
chr16.686988	4.48307	0.0476162	+	promoter	Cpg_island	C16orf13	NM_001040162;NM_001040165;NM_001040160;NM_001040161;NM_032366	84326	0	0	0	NA	0	0	NA	0	NA	0	0	0.159091	0	0.0666667	NA	0	0.111111	0	0	0
chr6.694657	-13.8665	0.0315368	-	promoter	South_shore	EXOC2	NM_018303	55770	1	0.666667	0.666667	1	0.916667	1	1	1	1	1	0.789474	0.8	0.857143	0.833333	0.6	0.611111	1	0.833333	0.909091	0.904762
chr11.694836	3.89233	0.0477969	-	promoter	Cpg_island	TMEM80	NM_174940;NM_001042463	283232	0	0	0	0	0.0869565	0	0	0	0	0	0	0	0.0714286	0	0	0.16129	0	0.125	0	0.037037
chr11.694938	-1.18293	0.0337946	-	promoter	Cpg_island	DEAF1	NM_021008	10522	0	0.03125	0.04	0	0	0	0	0	0	0	0.0222222	0	0	0	0	0	0	0	0	0
chr19.695788	20.8816	0.0294838	+	promoter	intercpg	PRSSL1	NM_214710	400668	0.461538	0.777778	0.833333	0.571429	0.571429	0.833333	NA	0	0.545455	0.666667	0.978261	1	0.84375	0.833333	1	1	0.611111	0.769231	0.888889	0.777778
chr16.697875	7.06834	0.0354072	+	promoter	North_shore	FAM195A	NM_138418	84331	0	0	0.117647	0	0.0212766	0	0	0.0454545	0.0357143	0	0	0.173913	0.178571	0.0833333	0	0.3	0	0.0555556	0.0434783	0
chr17.703938	10.0277	0.0354627	+	utr3	intercpg	NXN	NM_022463	64359	NA	1	NA	1	0.555556	NA	1	1	1	0.857143	0.769231	1	1	1	1	1	NA	1	1	1
chr11.706273	-5.2022	0.018622	-	utr5	Cpg_island	EPS8L2	NM_022772	64787	0	0.0952381	0	0	0	0	NA	0.111111	NA	0.2	NA	0	NA	0	0	0	0	0	0	0
chr9.706988	3.33925	0.000951206	+	utr5	North_shore	KANK1	NM_153186;NM_015158	23189	0	0	0.0277778	0	0	0	0	0	0	0	0	0.0177515	0.027027	0.153846	0.0408163	0	0.0681818	0.0263158	0.0217391	0.047619
chr9.707022	4.65814	0.0125247	+	utr5	Cpg_island	KANK1	NM_153186;NM_015158	23189	0	0	0	0	0.0722892	0	0	0	0	0	0	0.0175439	0	0.25	0.0588235	0	0	0.0384615	0.0166667	0.0526316
chr9.707037	3.32458	0.00265534	+	utr5	Cpg_island	KANK1	NM_153186;NM_015158	23189	0	0	0	0	0	0	0	0	0	0	0	0	0	0.147059	0.0588235	0	0.0441176	0.0208333	0	0.0442478
chr9.707040	3.43147	0.00685934	+	utr5	Cpg_island	KANK1	NM_153186;NM_015158	23189	0	0	0	0.0285714	0	0	0	0	0	0	0	0	0	0.190476	0.0588235	0	0.0555556	0.0384615	0.03125	0.0169492
chr19.708532	18.8444	0.0253142	-	promoter	Cpg_island	PALM	NM_002579;NM_001040134	5064	0	0.125	NA	0	0	0.133333	0.2	NA	0.0909091	0	0	0.545455	0	NA	0.571429	0.111111	0	0.1	0.166667	0.416667
chr19.708573	16.6611	0.0346071	+	promoter	Cpg_island	PALM	NM_002579;NM_001040134	5064	0	0.0909091	0	NA	0.25	NA	0	0	0	0.285714	0	0.0597015	0.15	0	0.607143	0.148148	0.111111	0.5	0.4375	0
chr18.712961	4.92851	0.0265433	+	promoter	Cpg_island	ENOSF1	NM_017512;NM_001126123;NM_202758	55556	0	0.0434783	0.0322581	0	0	0	0	0.0540541	0	0	0	0.225352	0	0.0833333	0.0434783	0.031746	0.0322581	0.0454545	0.0526316	0
chr18.712971	-14.4365	0.0426227	-	promoter	Cpg_island	ENOSF1	NM_017512;NM_001126123;NM_202758	55556	0	0.243243	0.296296	0.705882	0.0163934	0	0	0	0.285714	0.0909091	0.476923	0	0	0	0	0	0.12	0	0	0.171429
chr16.718106	1.1212	0.0435887	+	utr5	Cpg_island	RHOT2	NM_138769	89941	NA	0	0	0	0	0	0	0	0	0	0	0	0	0	0.047619	0	0	0.047619	0	0.0117647
chr4.724801	11.1	0.0395153	-	utr5	Cpg_island	PCGF3	NM_006315	10336	1	0.909091	0.875	1	0.84	0.833333	NA	1	0.363636	0.769231	0.8	0.891892	1	1	0.96	1	0.777778	0.9375	1	1
chr4.724885	-12.6647	0.0357353	-	utr5	Cpg_island	PCGF3	NM_006315	10336	1	0.866667	NA	1	1	NA	NA	1	0.9	0.928571	1	0.68	NA	1	0.857143	0.666667	1	0.666667	0.75	1
chr16.725308	18.7693	0.00545732	-	promoter	intercpg	RHBDL1	NM_003961	9028	NA	0	0	NA	0.0909091	0	0	0	0	0	0	0	0.0833333	0.0714286	0.857143	0.130435	0.0833333	0.2	0.192308	0.153846
chr16.725696	3.7739	0.0484396	-	utr5	North_shelf	STUB1	NM_005861	10273	0	0	0	NA	0.027027	0	0	0	0	0	0	0.148148	0.0192308	0	0	0	0.1	0.0416667	0.0416667	0
chr11.727466	16.0362	0.00651238	-	utr3	South_shore	EPS8L2	NM_022772	64787	1	0.857143	0.894737	0.307692	0.928571	1	NA	0.85	0.909091	0.952381	0.772727	1	1	1	NA	1	1	1	0.904762	1
chr11.727531	5.7183	0.0367149	+	utr3	South_shore	EPS8L2	NM_022772	64787	0.0555556	0	0.047619	0	0	0	0.103448	0.125	0	0.04	0	0.0681818	0.227273	0.0769231	0.103448	0.142857	0.16129	0	0	0
chr16.730437	1.33564	0.0432677	+	utr5	Cpg_island	STUB1	NM_005861	10273	0	0	0	0	0	0	0	0	0	0	0	0.0357143	0	0	0	0	NA	0	0	0
chr16.731820	15.0463	0.0447473	+	utr3	Cpg_island	PALM	NM_002579;NM_001040134	5064	0.346154	0.557692	0.181818	0.631579	0.469799	0.466667	0.214286	0.490566	0.444444	0.46875	0.326923	0.625	0.341463	0.62963	0.376471	0.888889	0.615385	0.72	0.3125	0.578947
chr16.731835	8.15834	0.00197898	+	utr3	Cpg_island	STUB1	NM_005861	10273	0	0	0	0	0	0.133333	0	0	0	0.0625	0	0.046875	0.142857	0.107143	0	0.222222	0.115385	0.0769231	0.03125	0.105263
chr16.735025	-19.6585	0.0183143	+	promoter	Cpg_island	WDR24	NM_032259	84219	1	0.727273	0.888889	1	0.555556	NA	0.791667	0.7	0.8	0.75	1	0.73913	0.705882	0.6	1	0.5	0.5	0.533333	0.666667	NA
chr10.736119	-3.45671	0.0337722	+	promoter	South_shore	KANK1	NM_153186;NM_015158	23189	0.0952381	0.0674157	0	0	0.0347826	0	0	0.176471	0	0	0.0782609	0	0	0	0	0.0238095	0.030303	0	0	0
chr16.740270	0.492915	0.0144376	+	utr5	Cpg_island	WDR24	NM_032259	84219	0	0	0	0	0	0	0	0	0	0	0	0.0106383	0	0.0169492	0	0	0	0	0.0212766	0
chr16.744147	8.71752	0.0288348	-	utr3	Cpg_island	FBXL16	NM_153350	146330	0	0	NA	NA	0	0	NA	0.0212766	0	0	0	0.225	0	0.3125	0	0	0.157895	0.0833333	0.0714286	0
chr11.746328	16.7649	0.0435328	-	promoter	North_shore	TALDO1	NM_006755	6888	0.685714	0.923077	NA	1	0.73913	0.823529	0	0.733333	1	0.888889	0.733333	1	NA	0.769231	0.770833	0.888889	1	1	0.9	1
chr11.746368	-6.5143	0.0126672	-	promoter	North_shore	TALDO1	NM_006755	6888	1	1	1	1	0.888889	1	1	1	0.958333	0.941176	0.96	0.890625	0.96875	0.863636	0.730769	0.962963	0.892857	0.952381	0.944444	0.942857
chr19.747147	-4.66074	0.0292953	+	utr3	Cpg_island	PALM	NM_002579;NM_001040134	5064	1	1	1	1	1	1	1	1	1	1	1	1	0.818182	1	1	1	0.833333	1	1	0.947368
chr12.753199	-23.3126	0.0163256	+	promoter	South_shore	NINJ2	NM_016533	4815	0.666667	0.35	0.5	1	0.452381	0.888889	1	0.7	0.733333	0.37931	0.65625	0.5	0.272727	0.481481	0.507246	0.333333	0.36	0.578947	0.333333	0.59375
chr7.754643	5.28228	0.0335952	+	promoter	South_Shelf	PRKAR1B	NM_001164761;NM_001164760;NM_001164759;NM_001164762;NM_002735;NM_001164758	5575	1	0.705882	0.85	1	0.913043	NA	1	1	0.909091	0.962963	0.882353	1	1	1	1	1	1	1	0.956522	0.954545
chr16.756040	1.13598	0.0484028	-	promoter	Cpg_island	FBXL16	NM_153350	146330	0	0	0	0	0	0	0	0	0	0	0	0.0392157	0	0	0	0.04	0	0	0	0
chr16.756630	1.4921	0.0380604	+	promoter	Cpg_island	-	-	-	0	0	0	0	0	0	0	0	0	0	0	0.0333333	0	0	0	0	0	0.05	NA	0
chr16.756887	2.45408	0.0324144	-	promoter	South_shore	FBXL16	NM_153350	146330	0	0	0	0	0	NA	0	0	0	0.0588235	0	0.0833333	0	0	0	0.0344828	0.0714286	0.0555556	0	0.025641
chr16.756938	6.45293	0.0340559	-	promoter	South_shore	FBXL16	NM_153350	146330	0	0.0113636	0	0	0.149425	0	0	0	0.0416667	0	0	0.150685	0	0	0	0.190476	0.0909091	0.142857	0.148148	0.0178571
chr1.763078	5.41173	0.0312566	-	promoter	Cpg_island	LOC643837	NR_015368	643837	0	0	0	0.166667	0	0	0	0	0.0454545	0.030303	0.0240964	0.185185	0.0701754	0.12	0	0.0740741	0.025641	0.0869565	0	0.0952381
chr1.763080	8.0406	0.00321544	-	promoter	Cpg_island	NCRNA00115	NR_024321	79854	0	0	0.047619	0.0740741	0	0	0	0	0.0625	0	0	0.188679	0.105263	0.025	0.0357143	0.222222	0	0.0869565	0.0681818	0.097561
chr1.763088	3.79313	0.0463615	-	promoter	Cpg_island	LOC643837	NR_015368	643837	0	0	0.047619	0	0.0625	0	0	0	0	0.030303	0	0.185185	0.0350877	0.06	0	0	0.0769231	0	0.0454545	0.047619
chr1.763112	5.52046	0.0410524	-	promoter	Cpg_island	NCRNA00115	NR_024321	79854	0	0	0	0	0	0.111111	0	0	0.136364	0	0	0.185185	0	0.02	0.0357143	0.185185	0.128205	0	0	0.047619
chr1.763117	4.38955	0.00963853	-	promoter	Cpg_island	NCRNA00115	NR_024321	79854	0	0	0	0	0	0.111111	0	0.037037	0	0.0322581	0	0.148148	0.0892857	0.0204082	0.0357143	0.037037	0.0263158	0.0869565	0.0465116	0
chr1.764633	9.90185	0.00668944	+	promoter	South_shore	LOC643837	NR_015368	643837	0	0	0	NA	0	0	NA	0	0.047619	0	0	0.33871	0.0666667	0.151515	0	0	0.0357143	0.0526316	0.2	0.15
chr16.777401	2.40443	0.0186868	-	promoter	Cpg_island	CCDC78	NM_001031737	124093	0	0	0	0	0	0	NA	0	0	0	0	0.0537634	0.05	0	0	0	0	0	0.047619	0
chr16.777440	-8.91577	0.00133323	+	promoter	Cpg_island	CCDC78	NM_001031737	124093	0.28	0	0.0666667	NA	0.08	0	0.0833333	0.208333	0	0	0.142857	0.0217391	0.0434783	0	0	0	0	0	0	0
chr16.778348	1.17937	0.0398477	-	promoter	Cpg_island	HAGHL	NM_032304;NM_207112	84264	0	0	0	0	0	0	0	0	0	0	0	0.0375	0	0	0	0	0	0	0.037037	0
chr4.778793	-14.3122	0.0163752	+	utr3	Cpg_island	CPLX1	NM_006651	10815	0.647059	0.680851	0.444444	1	0.450704	0.785714	0.780488	0.632911	0.685714	0.666667	0.769231	0.572581	0.555556	0.411765	0.6875	0.619718	0.522727	0.358491	0.603448	0.465753
chr4.778854	-18.7115	0.0137189	+	utr3	Cpg_island	CPLX1	NM_006651	10815	0.696078	0.804348	0.888889	1	0.544118	0.857143	1	0.962025	0.657143	0.723077	0.72028	0.780488	0.587302	0.823529	0.635417	0.631579	0.44186	0.528302	0.741379	0.527778
chr4.778870	-15.6601	0.00228222	+	utr3	Cpg_island	CPLX1	NM_006651	10815	0.72549	0.659574	0.814815	1	0.619718	0.642857	0.804878	0.56962	0.628571	0.69697	0.741259	0.685484	0.507937	0.45098	0.572917	0.618421	0.431818	0.396226	0.586207	0.643836
chr4.778924	-13.8723	0.0227661	+	utr3	Cpg_island	-	-	-	0.591549	0.869565	0.777778	1	0.829787	0.75	0.809524	0.875	0.625	0.714286	0.765101	0.541176	0.615385	0.578947	0.678161	0.770492	0.615385	0.826087	0.733333	0.53125
chr4.779050	-13.8977	0.0369132	+	utr3	Cpg_island	CPLX1	NM_006651	10815	0.888889	0.636364	0.666667	0.615385	0.782609	0.714286	1	0.638889	0.521739	0.566667	0.918033	0.52459	0.658537	0.65	0.55	0.65	0.459459	0.482759	0.777778	0.62
chr4.779183	-17.3358	0.00632897	+	utr3	Cpg_island	LOC100129917	NR_036511;NR_036512	100129917	0.972222	0.607843	1	0.764706	0.587302	0.666667	0.944444	0.785714	0.631579	0.725	0.732143	0.56391	0.608696	0.538462	0.760563	0.6	0.580645	0.444444	0.6	0.659574
chr4.779813	7.42952	0.0187928	-	utr3	Cpg_island	LOC100129917	NR_036511;NR_036512	100129917	0	0	0	0	0	0	0	0	NA	NA	0	0.0816327	0.5	0	0.0322581	NA	0	0.125	0	0
chr11.790088	0.876827	0.0463097	+	utr5	Cpg_island	CEND1	NM_016564	51286	0	0	0	0	0	0	0	0	0	0	0	0.0416667	0	0	0.0217391	NA	0	0	0	0
chr19.795746	8.03377	0.00530974	+	promoter	North_shore	PTBP1	NM_031990;NM_002819;NM_031991;NM_175847	5725	0	0.0666667	0	0	0.0196078	0	0	0	0.0333333	0	0.0618557	0.24	0.0625	0.0740741	0.171875	0.0151515	0.128205	0.0833333	0.0434783	0.0769231
chr19.795782	16.853	0.0464334	+	promoter	North_shore	PTBP1	NM_031990;NM_002819;NM_031991;NM_175847	5725	0	0.181818	0	0	0.222222	NA	0	0.214286	0.333333	0.230769	0.304348	0.463415	0.185185	0.272727	0.44898	0.0714286	0.833333	0.1	0.153846	0.333333
chr11.797801	2.86287	0.04222	-	promoter	Cpg_island	SLC25A22	NM_001191061;NM_001191060;NM_024698	79751	NA	0	0	0	0	0	0	0	0	0	0	0	0.030303	0	0	0.159091	0.0425532	0	0	0
chr11.797997	1.42775	0.0100166	+	promoter	Cpg_island	SLC25A22	NM_001191061;NM_001191060;NM_024698	79751	0	0	0	0	0	0	NA	0	0	0	0	0.0377358	0	0	0.0243902	0	0	0	0	0
chr11.800225	-6.01181	0.0348775	-	promoter	North_shore	SLC25A22	NM_001191061;NM_001191060;NM_024698	79751	1	1	0.857143	1	1	0.833333	NA	1	1	0.833333	1	0.910714	0.961538	NA	1	0.833333	0.818182	0.833333	0.888889	1
chr19.804127	-10.9943	0.0160398	+	promoter	North_shore	PTBP1	NM_031990;NM_002819;NM_031991;NM_175847	5725	0.714286	0.490196	0.375	NA	0.566265	0.5	0.594595	0.291667	0.409091	0.451613	0.428571	0.333333	0.354167	0.347826	0.357143	0.4375	0.225	0.305556	0.393939	0.476744
chr19.804128	-18.7937	0.0126936	-	promoter	North_shore	PTBP1	NM_031990;NM_002819;NM_031991;NM_175847	5725	NA	0.481481	0.5	0.666667	0.518519	0.571429	1	0.2	0.5	0.55	0.704545	0.4	0.4	0.173913	0.321429	0.47619	0.454545	0.2	0.526316	0.566667
chr19.804479	-17.4916	0.0248644	+	promoter	Cpg_island	PTBP1	NM_031990;NM_002819;NM_031991;NM_175847	5725	0.666667	0.818182	0.666667	1	1	1	1	1	1	1	1	0.757576	NA	0.923077	0.823529	0.333333	1	0.8	1	0.655172
chr19.804607	-4.81593	0.042496	-	promoter	Cpg_island	PTBP1	NM_031990;NM_002819;NM_031991;NM_175847	5725	NA	1	1	NA	1	1	1	NA	1	1	1	1	1	1	1	1	1	0.947368	0.8125	0.875
chr19.804916	-7.96144	0.0457313	-	promoter	Cpg_island	PTBP1	NM_031990;NM_002819;NM_031991;NM_175847	5725	1	1	1	0.966667	1	1	NA	1	1	0.863636	1	0.792453	0.956522	0.571429	1	0.882353	1	0.969697	0.913043	1
chr11.808450	18.2317	0.0307642	+	promoter	North_shore	LRDD	NM_145887;NM_145886	55367	0.507937	0.642857	0.578947	0.126984	0.2	0.777778	0.352941	0.325	0.555556	0.5	0.26087	0.735294	0.323529	0.590909	0.8125	0.561404	0.416667	0.75	0.541667	0.666667
chr11.810717	3.46641	0.00926474	+	promoter	South_shore	RPLP2	NM_001004	6181	0	0	0	0	0	0	0	0	0	0	0	0.0350877	0.0769231	0	0	0.121212	0	0	0	0.0175439
chr11.810998	2.38074	0.0305255	+	promoter	South_shore	SNORA52	NR_002585	619565	0	0	0	0	0	0	0	0	0	0	0	0.0810811	0.0714286	0	0	0.0422535	0	0	0	0
chr16.811100	-29.8016	0.0497756	+	utr5	intercpg	MSLN	NM_013404;NM_001177355;NM_005823	10232	NA	0.857143	NA	1	0.9	0.625	NA	1	0.3	0.363636	0	0.117647	0.125	0.4	0.52	0.176471	0.222222	0.285714	0.538462	0.285714
chr16.811124	-15.0449	4.76e-05	+	utr5	intercpg	MSLN	NM_013404;NM_001177355;NM_005823	10232	1	1	NA	1	1	1	NA	1	1	1	1	0.818182	NA	0.8	0.785714	1	0.833333	1	0.823529	1
chr19.811748	6.42519	0.0100237	-	promoter	North_shore	MIR3187	NR_036154	100422854	0.795918	1	1	1	0.940299	0.96	1	0.75	0.96875	0.870968	0.975904	1	0.882353	1	1	1	1	1	1	1
chr19.811949	-8.7536	0.0106435	-	promoter	Cpg_island	PTBP1	NM_031990;NM_002819;NM_031991;NM_175847	5725	1	NA	NA	0.933333	1	1	NA	0.918367	0.870968	1	1	0.900826	0.777778	0.913043	NA	0.943925	0.782051	1	0.916667	0.897436
chr19.811954	-8.52131	6.46e-05	+	promoter	Cpg_island	MIR3187	NR_036154	100422854	0.96875	NA	NA	1	1	1	1	1	1	1	1	0.897436	1	1	NA	0.932584	0.933333	0.846154	1	0.818182
chr19.812535	12.5045	0.0168735	+	promoter	Cpg_island	MIR3187	NR_036154	100422854	0.733333	0.772727	NA	NA	0.727273	0.9	1	0.903226	0.625	0.909091	0.918919	1	0.8	0.8	1	1	0.88	1	1	1
chr19.812699	9.89646	0.047104	+	promoter	Cpg_island	MIR3187	NR_036154	100422854	NA	0.785714	0.428571	1	0.785714	1	NA	1	1	1	1	NA	1	1	1	1	1	1	1	1
chr19.812735	-6.8988	0.00871783	-	promoter	Cpg_island	LPPR3	NM_024888	79948	1	1	NA	1	0.956522	1	1	1	1	1	1	1	0.88	0.75	1	0.880952	1	1	0.875	0.875
chr19.812791	-13.6576	0.0112096	+	promoter	Cpg_island	MIR3187	NR_036154	100422854	NA	0.928571	1	1	0.964286	0.777778	NA	1	1	0.928571	1	NA	0.785714	0.8	0.62963	1	1	0.777778	0.714286	0.888889
chr19.812794	-7.16319	0.0474181	+	promoter	Cpg_island	MIR3187	NR_036154	100422854	NA	0.928571	1	1	0.928571	1	NA	1	0.916667	1	0.958333	NA	0.857143	1	0.851852	1	1	0.777778	0.714286	0.888889
chr19.813044	3.76373	0.0399904	-	promoter	Cpg_island	LPPR3	NM_024888	79948	1	1	0.888889	1	1	1	1	1	0.769231	0.909091	0.95	1	1	NA	1	1	1	1	1	1
chr19.813065	6.78852	0.00453977	-	promoter	Cpg_island	LPPR3	NM_024888	79948	1	1	1	1	0.846154	0.818182	0.888889	0.914894	0.833333	1	0.948718	1	1	NA	1	1	1	1	1	1
chr19.813178	-9.50313	0.00585832	+	promoter	Cpg_island	MIR3187	NR_036154	100422854	1	1	1	NA	1	1	1	1	1	1	0.802817	0.85	0.966667	0.9	1	0.90625	0.884615	0.944444	0.935484	0.857143
chr11.818380	-15.2769	0.0477771	+	promoter	North_shore	PNPLA2	NM_020376	57104	1	1	1	1	1	0.888889	NA	0.75	1	0.789474	1	1	0.846154	1	0.214286	0.857143	0.823529	0.714286	0.857143	0.636364
chr16.818381	24.3666	0.013172	-	promoter	intercpg	PNPLA2	NM_020376	57104	0	0.0666667	0.133333	0	0.192308	0.166667	0	0.555556	0.263158	0.533333	0.548387	0.46875	0.5625	0.222222	0.567568	0.615385	0.555556	0.333333	0.25	0.5
chr4.819850	2.66663	0.019436	+	utr5	Cpg_island	CPLX1	NM_006651	10815	0	0	0	0	0	0	NA	0	0	0	0	0	NA	0	0	0.0357143	0	0	0	0.125
chr4.820732	2.71095	0.0368675	+	promoter	Cpg_island	CPLX1	NM_006651	10815	0	0	NA	0	0	0	0	0	0	0	0	0.148148	0	0	0	0	0.0384615	0	0	0.025
chr19.822297	-4.52322	0.0316937	-	promoter	Cpg_island	LPPR3	NM_024888	79948	0	0	0	0	0	0	0	0.157895	0.04	0.05	0.15625	NA	0	0	0	0	0	0	0	0
chr19.822399	3.1545	0.0354439	+	promoter	Cpg_island	LPPR3	NM_024888	79948	0	0	0	NA	0	0	NA	0	0	0	0	0.0416667	0	0	0	0	0	0	0.136364	0.0714286
chr19.822401	2.0393	0.0479565	+	promoter	Cpg_island	LPPR3	NM_024888	79948	0	0	0	NA	0	0	NA	0	0	0	0	0.0416667	0	0	0	0.142857	0	0	0	0.0714286
chr19.822436	6.00187	0.0445657	+	promoter	Cpg_island	LPPR3	NM_024888	79948	0	0	0	NA	0	0	NA	0	0	0	0	0.375	0	0.0322581	0	0	0	0	0.0434783	0
chr19.826093	14.6518	0.000134281	-	promoter	South_Shelf	LPPR3	NM_024888	79948	0.771739	0.896552	0.8	0.0833333	0.74	0.764706	0.69697	0.72093	0.787879	0.75	0.596154	0.876543	0.924528	0.878788	0.795699	0.864865	0.866667	0.875	0.857143	0.913793
chr11.827288	-11.0929	0.0230436	+	promoter	Cpg_island	EFCAB4A	NM_173584	283229	NA	0.0769231	0	0.189189	0	0	NA	0	0.142857	0	0.404762	0	0	0	0	0	0	NA	0	0
chr19.827593	4.78491	0.0430995	+	promoter	intercpg	AZU1	NM_001700	566	NA	0	0	0	0	0	0	0	0	0.133333	0	0.109091	0.0588235	0	0	0	0	0	0.0666667	0.142857
chr19.831966	-36.9491	0.00450262	+	utr3	North_shelf	AZU1	NM_001700	566	0.777778	0.529412	0.142857	1	0.48	0.285714	1	0.714286	0.517241	0.777778	1	0.321429	NA	0.5	0.128205	0.2	0.181818	0.5	0.230769	0.297297
chr16.835766	15.2736	0.0327242	-	utr3	North_shore	RPUSD1	NM_058192	113000	0	0	0	0	0.2	0.222222	0.0588235	0.333333	0.210526	0.222222	0.222222	0.5	0	0.555556	0.217391	0.142857	0.333333	0.222222	0.230769	0.3
chr16.837054	13.8654	0.0180257	+	promoter	North_shore	MSLNL	NM_001025190	401827	0.210526	0.214286	0.25	0	0.25	0.25	0.230769	0.538462	0.212121	0.285714	0.17037	0.44186	1	0.307692	0.390244	0.181818	0.4	0.25	0.304348	0.5
chr16.837202	17.654	0.0236097	+	promoter	North_shore	MSLNL	NM_001025190	401827	0.45098	0.936508	0.529412	1	0.882353	0.894737	0	0.820896	0.806452	0.878788	0.82716	1	0.821429	1	0.869565	0.948052	1	0.830189	0.777778	1
chr16.837442	-12.4898	0.00934245	-	promoter	Cpg_island	CHTF18	NM_022092	63922	1	0.833333	1	1	0.791667	NA	1	0.965517	1	1	1	0.926829	0.791667	0.944444	NA	0.774194	0.9	0.8	0.666667	0.888889
chr16.837540	20.5962	0.0176261	+	promoter	Cpg_island	MSLNL	NM_001025190	401827	0	0.05	0.05	0.0454545	0	0.25	0	0	0.047619	0.166667	0.333333	0.153846	0.0612245	0.277778	1	0.320755	0.133333	0.0833333	0.611111	0.233333
chr16.837697	-5.57918	0.04266	+	promoter	Cpg_island	CHTF18	NM_022092	63922	0.0769231	0.0769231	0.0833333	0	0.142857	0	0	0.235294	0.0869565	0	0	0	0	0	0	0	0	0	0.111111	0
chr16.837781	2.40054	0.0238065	+	promoter	Cpg_island	CD151	NM_004357;NM_139029;NM_139030;NM_001039490	977	0	0	0	0	0	0	0	0	0	0	0	0	0.0377358	0	0	0.0508475	0	0	0	0.133333
chr16.837821	-8.42051	0.0452148	+	promoter	Cpg_island	RPUSD1	NM_058192	113000	0.302326	0.1875	0.157895	0.179487	0	0	0	0.0909091	0.0869565	0.2	0.0754717	0	0.259259	0	0.02	0.0333333	0	0	0.0526316	0
chr16.838947	0.867019	0.0472782	-	promoter	Cpg_island	CHTF18	NM_022092	63922	0	0	0	0	0	0	0	0	0	0	0	0	0.0196078	0	0.0222222	0	0	0	0	0.03125
chr19.839033	-20.9798	0.0238559	+	promoter	South_Shelf	PRTN3	NM_002777	5657	0	0.0769231	0.4	1	0.714286	0.357143	NA	0.333333	0.153846	0.230769	0.309524	0	0.208333	0.190476	0	0.0952381	0.153846	0.166667	0.08	0
chr11.840324	-14.5801	0.023287	+	utr3	North_shore	TSPAN4	NM_003271;NM_001025236;NM_001025234;NM_001025238;NM_001025237;NM_001025239;NM_001025235	7106	NA	0.878788	0.714286	1	1	NA	1	1	0.928571	0.875	0.674419	0.566667	0.846154	0.878788	0.65	0.780488	0.862069	0.64	0.76	0.923077
chr19.840880	21.814	0.00537071	+	promoter	North_shelf	PRTN3	NM_002777	5657	0.333333	0.363636	0.0909091	NA	0.42	0.111111	0	0.181818	0.294118	0.5	0.462963	0.621622	0.333333	0.363636	0.423729	0.56	0.457143	0.55	0.733333	0.604651
chr9.841397	5.73727	0.0355856	+	promoter	Cpg_island	DMRT1	NM_021951	1761	0	0	0	0	0	0	0	0	0	0	0	0.315789	0.0227273	0.16	0	0	0	0	0	0
chr9.841439	6.16615	0.0403488	-	promoter	Cpg_island	DMRT1	NM_021951	1761	0	0.0769231	0	0	0	0	NA	0	0.0526316	0	0	0.291667	0.0357143	0.111111	0	0.0714286	0	0	0.0714286	0.2
chr9.841631	-3.14304	0.0449634	-	promoter	Cpg_island	DMRT1	NM_021951	1761	0.212121	0.0217391	0	0	0.012987	0	0	0	0	0	0	0	0	0	0	0	0	0	0	0
chr9.841693	3.51319	0.0182256	+	utr5	Cpg_island	-	-	-	0	0	NA	0	0	0	0	0	0	0	0	0.047619	0	0	0.0952381	0.125	0	0	0	0
chr9.841764	-4.41737	0.0324755	+	utr5	Cpg_island	DMRT1	NM_021951	1761	0.176471	0	0	0	0.0769231	0	NA	0.133333	0	0	0	0	0	0	0	0	NA	0	0	0
chr11.842796	1.54652	0.0474584	+	promoter	Cpg_island	TSPAN4	NM_003271;NM_001025236;NM_001025234;NM_001025238;NM_001025237;NM_001025239;NM_001025235	7106	0	0	0	0	0	0	0	0	0	0	0	0.0526316	0	0	0	0	0.0606061	0	0	0
chr4.843344	-12.0157	0.0118885	+	utr3	Cpg_island	GAK	NM_005255	2580	NA	1	NA	1	0.9	NA	1	1	1	0.941176	1	1	0.875	0.846154	1	0.782609	1	0.75	NA	0.72
chr11.843485	2.7264	0.0318314	+	promoter	South_shore	TSPAN4	NM_003271;NM_001025236;NM_001025234;NM_001025238;NM_001025237;NM_001025239;NM_001025235	7106	0	0	0	0	0	0	0	0	0	0	0	0	0.115385	0	0.104478	0	0	0.037037	0	0
chr19.848076	11.3818	0.00583887	+	utr3	Cpg_island	PRTN3	NM_002777	5657	NA	0	0	0.142857	0	0	0	0	0	0	0	0.231884	0.142857	0	0.09375	0.0980392	0.153846	NA	0	0.0689655
chr16.848193	-8.51201	0.0463942	+	utr3	North_shelf	GNG13	NM_016541	51764	1	1	1	1	0.974359	0.875	NA	1	0.965517	0.882353	1	1	0.958333	0.833333	0.736842	1	0.5	0.833333	0.941176	0.866667
chr16.848570	12.0976	0.0418993	+	utr3	North_shore	GNG13	NM_016541	51764	0.423077	0.666667	0.888889	0.521739	0.966667	0.923077	NA	0.866667	0.875	1	1	1	1	1	1	1	0.9375	0.9375	1	0.828571
chr5.850746	-18.4798	0.0335206	-	utr5	South_shore	ZDHHC11	NM_024786	79844	0.253731	0.228571	NA	0.425532	0.5	0.125	1	0.8125	0.227273	0.222222	0.535211	0.189189	0.133333	0.0952381	0.3	0.12766	0.333333	0.0952381	0.408163	0.241935
chr16.851255	1.96011	0.0334459	+	promoter	South_shore	PRR25	NM_001013638	388199	0	0	0	0	0	0	0	0	0	0	0	0	0.08	0	0	0	0.0555556	0.0833333	0	0
chr16.851298	9.58572	0.00633651	+	promoter	South_shore	GNG13	NM_016541	51764	0	0	0	0	0.0322581	0	0	0	0	0.0526316	0	0.421053	0.12	0.0416667	0	0.166667	0	0.153846	0.0322581	0.0625
chr5.852936	-11.6763	0.0341234	+	promoter	intercpg	ZDHHC11	NM_024786	79844	1	0.770833	1	1	0.974684	0.857143	0.752381	1	0.923077	0.864407	0.824324	0.826923	1	0.851064	0.7	0.751773	0.863636	0.85	0.909091	0.777778
chr10.853583	9.21972	0.0283337	-	utr3	North_shelf	-	-	-	0	0	0	NA	0	0	0	0.0952381	0	0	0	0.0851064	0.25	0	0.340426	0.0689655	0	0	0.166667	0
chr11.862669	-16.4347	0.0163434	+	utr5	South_Shelf	WNK1	NM_001184985;NM_014823;NM_213655;NM_018979	65125	0.83871	0.676471	0.533333	1	0.723077	0.761905	1	0.763158	0.535714	0.536585	0.817073	0.554054	0.434783	0.666667	0.604167	0.6	0.692308	0.818182	0.567568	0.466667
chr11.866817	11.8674	0.0137123	+	utr3	intercpg	-	-	-	0.04	0.0133333	0.12	0.166667	0.0481283	0	0.145833	0	0.0178571	0.222222	0.00411523	0.431579	0.266667	0.314286	0.216216	0.285714	0.04	0.115385	0.0943396	0.0288462
chr19.868099	-18.5643	0.00992676	+	utr3	Cpg_island	MED16	NM_005481	10025	1	0.545455	0.9	1	0.851852	NA	1	1	0.75	0.9	1	0.555556	0.833333	0.6	0.588235	0.893617	0.727273	0.846154	0.846154	0.833333
chr17.883381	1.93397	0.0312974	-	promoter	Cpg_island	NXN	NM_022463	64359	0	0	0	0	0	0	0	0	0.0181818	0.0454545	0	0.0526316	0	0.04	0.0224719	0.0206186	0	0	0.0232558	0.0266667
chr17.883564	7.61314	0.0178939	+	promoter	South_shore	NXN	NM_022463	64359	0	0	0	0	0.121212	0	NA	0	0	0.25	0	0.0384615	0.25	0.157895	0	0.0285714	0.0666667	0.0625	0.142857	0.133333
chr17.883715	5.93164	0.0228376	+	promoter	South_shore	-	-	-	0	0	0	0	0	0	NA	0	0	0	0.02	0.123077	0	0	0.266667	0.0588235	0	0.142857	0.0384615	0
chr17.884177	24.0271	0.0371957	-	promoter	South_shore	NXN	NM_022463	64359	0	0.461538	0.366667	0	0.428571	0	0	0.35	0.25	0.521739	0.254545	0	0.365385	0.4375	0.666667	0.857143	0.333333	0.5	0.210526	0.583333
chr19.893884	19.2391	0.0368741	+	promoter	South_shore	MED16	NM_005481	10025	0.384615	0.5	1	NA	0.685714	NA	NA	0.444444	0.9	0.842105	0.666667	0.9375	0.826087	0.666667	1	1	1	0.8	0.75	0.636364
chr1.894924	4.60966	0.0188684	+	promoter	Cpg_island	KLHL17	NM_198317	339451	0	0	0	0	0	0	0	0	0	0	0	0.114286	0	NA	0	0.0952381	0	0	0	0
chr1.895192	5.57717	0.0233526	-	promoter	Cpg_island	NOC2L	NM_015658	26155	0.107143	0	0	0	0	0.1	0	0	0.04	0	0	0.118644	0.0666667	0	0	0.0204082	0.0512821	0.16	0.0833333	0.123288
chr1.895413	-13.1155	0.0278183	+	promoter	Cpg_island	NOC2L	NM_015658	26155	NA	0.190476	0.166667	0	0.2	0.166667	0.307692	0.375	0	0.222222	0.142857	0	0.0384615	0	0	0.333333	0.25	NA	0	0
chr1.895456	2.20285	0.038404	+	promoter	Cpg_island	NOC2L	NM_015658	26155	0	0.0454545	0	0	0.010989	0	0	0	0	0	0	0	0.0714286	0.1	0	0.057971	0.0384615	0	0	0.030303
chr1.895493	-11.0962	0.0491301	+	promoter	Cpg_island	NOC2L	NM_015658	26155	0.396226	0	0	0.571429	0.5	0.0833333	NA	0.133333	0.136364	0.0571429	0.025641	0	0	0.0666667	0.0588235	0	0.0714286	0.153846	0	0.09375
chr1.895512	4.8655	0.0372196	+	promoter	Cpg_island	KLHL17	NM_198317	339451	0	0	0.2	0	0	0	NA	0	0	0	0	0.103448	0.03125	0	0	0.1	0.0666667	0	0	0.133333
chr1.895712	-10.6568	0.0408859	+	promoter	Cpg_island	NOC2L	NM_015658	26155	0.307692	0.333333	0.157895	0.520833	0.16129	0	0	0.0769231	0	0.129032	0.142857	0.0833333	0.0555556	0.0606061	0.235294	0	0.0857143	0	0.115385	0
chr1.896623	6.58656	0.0088251	+	promoter	Cpg_island	NOC2L	NM_015658	26155	0.0384615	0.0454545	0	NA	0	0	0	0	0	0	0.02	0.121951	0.1	0	0.25	0	0	NA	0	0.181818
chr18.904591	0.834044	0.015378	-	promoter	Cpg_island	ADCYAP1	NM_001117;NM_001099733	116	0	0	0	0	0	0	0	0	0	0	0	0	0.00769231	0	0.00943396	0	0.025	0	0.0434783	0
chr17.907106	-21.1746	0.0448086	-	utr3	North_shelf	ABR	NM_001159746;NM_001092;NM_021962	29	1	0.833333	0.666667	1	0.647059	1	1	0.428571	0.625	1	1	0.727273	0	0.666667	0.888889	0.818182	1	0.7	0.75	0.6
chr17.907778	-23.2758	0.0110123	+	utr3	North_shelf	ABR	NM_001159746;NM_001092;NM_021962	29	0.916667	0.736842	0.444444	1	0.964286	0.857143	0.9	0.8125	1	0.785714	0.75	0.815789	0.916667	0.608696	0.380952	0.566667	0.166667	0.769231	0.666667	0.4375
chr17.907839	-15.3105	0.0317585	+	utr3	North_shelf	ABR	NM_001159746;NM_001092;NM_021962	29	1	0.882353	0.684211	1	0.923077	0.9	0.2	0.8125	0.923077	0.846154	0.933333	0.555556	0.818182	0.619048	0.761905	0.730159	0.583333	0.833333	0.888889	0.666667
chr1.911481	18.4716	0.018989	-	utr3	North_shore	C1orf170	NR_027693	84808	0	0.153846	0	NA	0.470588	0	0	0	0.0909091	0.178571	0.166667	0.321429	0.6	0.333333	0	0.344828	0.185185	0.3	0	0.346154
chr1.911502	19.9489	0.00886478	+	utr3	North_shore	C1orf170	NR_027693	84808	0.195122	0.222222	0.0625	0	0	0	0	0.0526316	0	0.25	0.25	0.0769231	0	0.461538	0.444444	0.378378	0.25	0.375	0.142857	0.307692
chr1.911503	18.3747	0.0389387	-	utr3	North_shore	TRIP13	NM_004237	9319	0.384615	0.230769	0.153846	NA	0.647059	0.2	0	0.173913	0.285714	0.214286	0.333333	0.535714	0.6	0.25	0.666667	0.517241	0.207547	0.789474	0.142857	0.461538
chr11.911577	-0.951544	0.0240409	-	promoter	Cpg_island	CHID1	NM_001142676;NM_001142677;NM_001142675;NM_001142674;NM_023947	66005	0	0	0.0217391	0	0.00990099	0.0454545	NA	0	0	0.0380952	0	0	0	0	0	0	0	0	0	0
chr19.915554	2.37061	0.0225113	+	promoter	North_shore	C19orf22	NM_138774	91300	0	0	0	NA	0	0	NA	0	0	0	0	0.0714286	0.0285714	0.0526316	0	0	0	0	0	0
chr19.917494	3.80871	0.0486371	+	utr5	Cpg_island	C19orf22	NM_138774	91300	0	0	0	0	0	0	0	0	0.0416667	0	0	0.0425532	0	0.0909091	0	0	0	0.125	0	0.151515
chr19.917499	-3.79591	0.0447968	-	utr5	Cpg_island	C19orf22	NM_138774	91300	0	0.1	0	0	0	0.142857	0	0	0	0.181818	0	0	0	0	0	0	0	0	0	0
chr1.917696	-11.8578	0.00832487	-	promoter	North_shelf	C1orf170	NR_027693	84808	0.109375	0.163265	0.0625	0.458333	0.163265	0.230769	0.0454545	0.148148	0.117647	0.05	0.242424	0	0.111111	0.0434783	0	0	0.0571429	0.106383	0	0.175
chr1.917716	-9.7992	0.0393436	-	promoter	North_shelf	C1orf170	NR_027693	84808	0.109375	0.1875	0	0.0416667	0.122449	0.307692	0.0454545	0.148148	0.235294	0.075	0.272727	0	0.111111	0	0	0	0.228571	0.0851064	0	0.236842
chr1.917727	-10.8724	0.0291	-	promoter	North_shore	C1orf170	NR_027693	84808	0.109375	0.122449	0.0625	0.458333	0.125	0.230769	0.0454545	0	0.264706	0.075	0.181818	0	0.0967742	0	0	0	0.171429	0.0851064	0	0.216216
chr11.924437	11.0462	0.0213981	+	promoter	North_shore	AP2A2	NM_012305	161	NA	0.181818	0.333333	NA	0.112903	0.0769231	NA	0.0909091	0.0857143	0.117647	0.104167	0.477273	0.0714286	0.0909091	0.3	0.0909091	0.230769	0.142857	0.357143	0.239437
chr11.924646	7.99183	0.034528	+	promoter	North_shore	ARID3A	NM_005224	1820	0	0.0322581	0.125	0	0.0714286	0.0666667	0	0	0.0909091	0	0.047619	0.365385	0.0217391	0.0454545	0.212121	0.0555556	0.142857	0.03125	0.266667	0.06
chr11.925666	2.14548	0.0473955	-	promoter	Cpg_island	ARID3A	NM_005224	1820	0	0	0	0	0	0	0	0	0	0	0	0.0701754	0	0	0	0	0.0714286	0	0	0
chr17.935001	16.1869	0.0415648	-	utr5	Cpg_island	HES4	NM_001142467;NM_021170	57801	NA	0	0	0	0.428571	0.333333	NA	0	0	0	0	0	NA	0	0.213115	0.0625	0.4	0.375	0.2	0.241379
chr17.935279	15.1056	0.00118097	-	promoter	South_shore	ABR	NM_001159746;NM_001092;NM_021962	29	0	0.142857	0.111111	0.0769231	0.117647	NA	0	0.0714286	0.0555556	0.0285714	0	0.294118	0.142857	0.166667	NA	0.321429	0.0869565	0.0714286	0.4	0.12
chr17.935455	24.0154	0.000855754	+	promoter	South_shore	ABR	NM_001159746;NM_001092;NM_021962	29	0.1875	0.115385	0.241379	0.166667	0.210526	0.1	0	0.176471	0.266667	0.285714	0.0714286	0.571429	0.307692	0	0.40678	0.6	0.333333	0.409091	0.380952	0.25
chr7.935473	20.5858	0.0280102	+	utr3	Cpg_island	GET4	NM_015949	51608	0.0666667	0.642857	0.818182	NA	0.818182	NA	0.375	0.769231	0.583333	0.642857	0.6	0.911765	0.7	0.769231	1	0.666667	0.916667	0.5625	0.809524	0.761905
chr1.935481	1.87537	0.0271939	+	utr5	Cpg_island	HES4	NM_001142467;NM_021170	57801	0	0	0	0	0	0	0	0	0	0	0	0.0681818	0.047619	0	0.0322581	0	0	0	0	0
chr1.936147	2.84724	0.0445081	+	promoter	Cpg_island	HES4	NM_001142467;NM_021170	57801	0	0	0	0	0	0	NA	0	0.025974	0	0	0.0963855	0.0645161	0.0769231	0	0	0	0.0909091	0	0
chr1.936243	3.69137	0.0240751	-	promoter	Cpg_island	HES4	NM_001142467;NM_021170	57801	0	0	0	0	0	0	0	0	0	0	0	0.0625	NA	0	0	0.08	0	0	0.142857	0
chr1.936654	-4.96385	0.0279469	+	promoter	Cpg_island	HES4	NM_001142467;NM_021170	57801	0	0	0	0.3	0.150943	0	0	0	0.0434783	0.0597015	0	0	0	0	0	0	0	0	0	0
chr7.937815	-10.729	0.0204772	+	utr3	South_shore	ADAP1	NM_006869	11033	0.766667	0.869565	0.909091	0.904762	0.875	0.714286	1	0.6	0.931034	0.761905	0.941176	0.753846	0.75	0.833333	0.810127	0.617647	0.7	0.882353	0.722222	0.72549
chr7.938294	-11.1257	0.0320098	+	utr3	South_shore	ADAP1	NM_006869	11033	0.333333	0.307692	0.357143	0	0	0.263158	NA	0.152174	0.4375	0.28	0.269231	0.0727273	0.1	0.185185	0.108696	0	0.0769231	0	0.275862	0.115385
chr1.953868	-8.63182	0.0488473	+	promoter	North_shore	AGRN	NM_198576	375790	1	0.843137	0.896552	1	0.903226	0.666667	NA	1	0.941176	0.925926	0.83908	0.904762	0.761905	0.928571	0.774194	0.659574	0.854167	0.933333	0.913043	0.754717
chr1.954567	3.22551	0.00669412	+	promoter	North_shore	AGRN	NM_198576	375790	0	0	0	0	0	0	0	0	0	0	0	0.121622	0	0	0.0147059	0.0149254	0.0416667	0	0	0.047619
chr7.961411	-17.1986	0.00767511	-	promoter	South_shore	ADAP1	NM_006869	11033	1	0.857143	1	1	0.88	0.888889	1	1	0.888889	0.833333	1	1	0.833333	0.666667	0.588235	0.384615	0.933333	0.823529	0.818182	0.833333
chr4.967697	-14.3907	0.0437854	-	promoter	Cpg_island	DGKQ	NM_001347	1609	0	0.0645161	NA	0	0.162162	0.142857	0.909091	0.190476	0.2	0.0833333	0.078125	0	0.2	0	0	0	0	0.307692	0	0.0818182
chr4.967870	-26.8847	0.000651709	-	promoter	Cpg_island	DGKQ	NM_001347	1609	0.846154	0.5	0.25	1	0.703704	0.5	0.755102	0.636364	0.631579	0.565217	0.703704	0.486486	0.6	0.333333	0.555556	0.16	0.272727	0.1	0.368421	0.5625
chr4.967873	19.7723	0.04771	+	promoter	Cpg_island	DGKQ	NM_001347	1609	NA	0.678571	0.538462	0	0.590909	0.5	0.380952	0.666667	0.878788	0.833333	1	0.809524	0.846154	0.538462	0.615385	0.777778	0.916667	0.818182	1	1
chr7.975047	18.3559	0.0195815	-	utr5	North_shore	ADAP1	NM_006869	11033	0.27451	0.6	0.285714	0.222222	0.617647	0.2	0	0.342857	0.318182	0.347826	0.387931	0.58	0.694444	0.382353	0.439024	0.577778	0.48	0.285714	0.608696	0.73913
chr7.975113	12.506	0.0428797	-	utr5	North_shore	ADAP1	NM_006869	11033	0.263736	0.294118	0.666667	NA	0.435484	0.555556	0.333333	0.333333	0.487179	0.44	0.672956	0.721649	0.589744	0.626866	0.534884	0.433735	0.512195	0.680851	0.512195	0.551724
chr9.976721	2.93117	0.0284106	+	promoter	Cpg_island	DMRT3	NM_021240	58524	0	0	0	0	0	0	0	0	0	0	0	0.0769231	0	0.0769231	0.09375	0	0	0	0	0
chr9.976723	4.40688	0.00792431	+	promoter	Cpg_island	DMRT3	NM_021240	58524	0	0	0	0	0	0	0	0	0	0	0	0.0769231	0	0.153846	0	0.108108	0	0	0	0.0425532
chr9.976922	1.27432	0.027426	+	promoter	Cpg_island	ABR	NM_001159746;NM_001092;NM_021962	29	0	0	0	0	0	0	0	0	0	0	0	0.0350877	0.027027	0	0	0	0.047619	0	0	0
chr10.978665	-9.08186	0.0299908	-	promoter	South_shore	-	-	-	0.967742	0.904762	0.875	NA	0.95	1	1	1	0.939394	0.930233	0.820359	0.883117	0.883721	0.866667	1	0.790323	0.977778	0.677419	0.9	0.74
chr10.978672	-8.09946	0.0329567	+	promoter	South_shore	-	-	-	1	1	0.916667	NA	0.923077	1	NA	1	1	1	1	0.615385	1	0.6	1	0.944444	0.892857	0.882353	1	0.962963
chr17.982198	-9.53372	0.046212	+	utr5	South_shore	ABR	NM_001159746;NM_001092;NM_021962	29	NA	0.9375	1	1	0.897436	1	1	NA	0.923077	0.909091	1	1	0.777778	0.793103	0.727273	0.538462	0.954545	0.909091	0.928571	1
chr20.983170	2.1405	0.012848	-	promoter	Cpg_island	SLC26A1	NM_213613;NM_022042;NM_134425	10861	0	0	0	0	0	0	0	0	0	0	0	0	0.0204082	0	0	0.0285714	0	0.111111	0.0555556	0.0571429
chr20.983381	3.18478	0.0136726	-	promoter	South_shore	RSPO4	NM_001040007;NM_001029871	343637	0	0	0	0	0	0	0	0	0	0	0	0	0.0238095	0	0	0.133333	0.047619	0	0	0.0625
chr7.985487	23.0107	0.0120015	-	promoter	North_shore	ADAP1	NM_006869	11033	0.625	0.666667	0.444444	0.5	0.647059	NA	NA	0.384615	0.4	0.714286	0.875	0.368421	0.884615	0.882353	0.878049	0.944444	NA	0.6	0.9375	0.833333
chr4.985516	23.0046	0.0241214	-	utr5	Cpg_island	IDUA	NM_000203	3425	0.294118	0.857143	1	NA	0.913043	1	0	0.416667	NA	0.857143	0.857143	1	0.875	0.8	1	1	1	1	1	0.9
chr7.985645	20.4341	0.0157137	+	promoter	Cpg_island	ADAP1	NM_006869	11033	0.714286	0.625	0.5	0.702128	0.5	0.272727	0.142857	0.689655	0.7	0.612903	0.31875	0.944444	0.545455	0.75	0.692308	0.785714	0.941176	0.380952	0.695652	0.851852
chr7.985655	18.6536	0.0338079	-	promoter	Cpg_island	ADAP1	NM_006869	11033	0.464286	0.533333	0.277778	0	0.848485	0.571429	0.727273	0.75	0.571429	0.705882	0.37931	0.673469	0.666667	0.727273	1	0.8	0.736842	0.652174	0.645161	0.627907
chr7.985673	15.3722	0.0316377	+	promoter	Cpg_island	ADAP1	NM_006869	11033	0.514286	0.608696	0.863636	0.698925	0.386667	0.545455	1	0.62069	0.631579	0.661017	0.484177	0.869159	0.636364	0.866667	0.692308	0.857143	1	0.692308	0.780488	0.622642
chr7.985687	18.6959	0.0424436	-	promoter	Cpg_island	ADAP1	NM_006869	11033	0.392857	0.366667	0.111111	0	0.323529	0.285714	0.5	0	0.564103	0.176471	0.60177	0.587629	0.666667	0.545455	0.391304	0.514286	0.684211	0.466667	0.193548	0.418605
chr7.985719	13.0415	0.0229479	+	promoter	Cpg_island	ADAP1	NM_006869	11033	0	0.107143	0.115385	0	0.117647	0.176471	0.185185	0.268293	0.130435	0	0	0.408451	0.0833333	0.3125	0.16129	0.25	0.0555556	0.0454545	0.28125	0.138889
chr4.987410	-15.3561	0.00204371	+	promoter	South_shore	IDUA	NM_000203	3425	1	0.782609	0.96	1	0.930233	1	1	1	0.818182	0.956522	1	0.7625	0.88	0.894737	0.461538	0.878788	0.782609	0.888889	0.941176	0.866667
chr7.994468	-2.17917	0.032772	+	promoter	Cpg_island	ADAP1	NM_006869	11033	0.0416667	0	0	0	0	0	NA	0.0263158	0	0.133333	0	0	0	0	0	0	0	0	0	0
chr7.994485	-7.99497	0.0156054	+	promoter	Cpg_island	ADAP1	NM_006869	11033	0	0.148148	0	0	0.25	0	NA	0.106667	0.357143	0	0	0	0	0	0	0	0	0	0	0
chr4.1006187	5.34871	0.0336324	-	promoter	Cpg_island	FGFRL1	NM_001004358;NM_001004356;NM_021923	53834	0.037037	NA	0	0	0	0	NA	0	0	0	0	0.0666667	0	0.0526316	0	0.181818	0	0.0769231	0.142857	NA
chr5.1009021	2.29868	0.0186668	+	promoter	Cpg_island	NKD2	NM_033120	85409	0	0	0	0	0	0	NA	0	0	0	0	0.0645161	NA	0	0	0.0465116	0	0	0	0
chr19.1010637	-9.6823	0.034318	-	utr3	Cpg_island	C19orf6	NM_033420;NM_001033026	91304	1	1	0.666667	NA	1	0.894737	1	1	1	1	0.931034	1	1	0.826087	0.85	0.916667	0.894737	0.882353	0.793103	0.636364
chr19.1010672	18.5609	0.0478273	+	utr3	Cpg_island	C19orf6	NM_033420;NM_001033026	91304	0.166667	0.133333	0.1	0.68	0.0434783	0	0	0	0	0.347826	0	0.537037	0.285714	0.3	0.241379	0.423077	0.12	0	0.35	0.363636
chr11.1011315	-12.7962	0.0228534	+	utr3	South_shore	AP2A2	NM_012305	161	1	0.95	0.846154	1	1	1	1	0.85	1	0.805556	0.982759	0.586207	0.895833	0.619048	1	0.958333	0.785714	0.857143	0.8	0.727273
chr7.1015358	5.31333	0.0301614	-	promoter	South_shore	COX19	NM_001031617	90639	0	0	0	0	0	0	0	0	0	0	0	0.142857	0	0.08	0.2	0	0	0	0	0
chr1.1017420	-6.4546	0.0214742	-	utr3	Cpg_island	C1orf159	NM_017891	54991	1	0.957447	1	1	0.962617	1	1	1	0.967213	1	1	0.89781	1	1	0.777778	1	0.878049	0.857143	1	0.861111
chr19.1019991	10.7945	0.010701	+	promoter	North_shore	C19orf6	NM_033420;NM_001033026	91304	0	0	0	0	0	NA	0	0	NA	0	0	0.0909091	0.0416667	0	0	0.163636	0.4	0	0	NA
chr19.1020447	7.5603	0.00358208	+	promoter	North_shore	C1orf159	NM_017891	54991	0	0	0	NA	0	0	0	0	0	0.0384615	0	0.228571	0.0909091	0.105263	0	0	0.0444444	0	0.0769231	0.151899
chr7.1022058	-12.8072	0.0445563	+	promoter	North_shore	CYP2W1	NM_017781	54905	0.243243	0.238095	0.368421	0.614035	0.375	0.142857	0.5	0.125	0.333333	0.12	0.311111	0.219512	0.0588235	0.172414	0.290909	0.0697674	0.294118	0.0714286	0.117647	0.333333
chr7.1022125	-22.7514	0.0280458	+	promoter	North_shore	CYP2W1	NM_017781	54905	1	0.666667	0.7	0.714286	0.565217	NA	1	1	0.714286	0.75	1	0.88	0.5	0.7	0.666667	0.44	0.333333	NA	0.6	0.75
chr7.1022135	-22.0693	0.0252137	-	promoter	North_shore	CYP2W1	NM_017781	54905	1	0.857143	0.545455	1	0.636364	1	1	1	1	0.666667	0.877551	0.3125	0.9	0.578947	0.4	0.84	NA	0.75	0.75	0.625
chr16.1022357	-11.8748	0.0276275	+	promoter	South_shore	LMF1	NR_033646;NM_022773;NR_033645	64788	1	0.842105	1	1	0.957447	1	NA	0.947368	0.863636	1	0.826087	0.944444	1	0.5	0.8	0.809524	0.714286	0.9375	0.722222	0.785714
chr19.1026466	2.27196	0.0217435	+	utr5	Cpg_island	CNN2	NM_004368;NM_201277	1265	0	0	0	0	0	0	0	0	0	0	0	0.05	0	0	0	0	0	0	0	0.0606061
chr16.1030281	-22.6507	0.0124161	+	promoter	Cpg_island	SOX8	NM_014587	30812	1	0.75	1	1	0.785714	0.8	NA	1	NA	0.8	1	0.666667	0.6	0.25	0.736842	1	0.5	1	0.75	0.6875
chr16.1030639	9.14665	0.0228905	+	promoter	Cpg_island	SOX8	NM_014587	30812	0	0.0987654	0.296296	0	0.116279	0	0	0.208333	0.027027	0.136364	0	0.0588235	0.0909091	0.101695	0.164384	0.107143	0.126984	0.057971	0.2	0.168224
chr16.1030675	2.37888	0.011361	+	promoter	Cpg_island	LMF1	NR_036442;NR_033645	64788	0	0	0	0	0.0227273	0	0	0	0	0	0	0.0588235	0	0	0.0547945	0	0.03125	0.0285714	0.0384615	0
chr16.1036195	13.3788	0.0209382	-	utr3	North_shore	LMF1	NR_036442;NR_033645	64788	0.25	0.181818	0	0.0294118	0.142857	0.125	0.4	0.166667	0	0.0555556	0.189189	0.0810811	0.111111	0.230769	0.26087	0.28125	0.45098	0.25	0.27027	0.363636
chr11.1037594	21.3307	0.0245694	+	promoter	South_shore	MUC6	NM_005961	4588	1	0.470588	0.444444	0.27451	0.357895	0.5	0	0.555556	0.75	0.472222	0.506667	0.716049	0.689655	0.73913	0.863636	0.702128	0.625	0.793103	0.944444	0.513514
chr11.1037640	12.9218	0.0360337	+	promoter	South_shore	MUC6	NM_005961	4588	0.428571	0.954545	1	NA	0.740741	0.8	1	0.909091	0.818182	0.769231	0.967213	1	1	0.625	1	1	0.875	1	1	1
chr11.1037651	20.642	0.0147984	+	promoter	South_shore	MUC6	NM_005961	4588	0.153846	0	0	NA	0.111111	0.0909091	0	0.0666667	0	0.4	0.166667	0.5	0.272727	0.111111	0.5	0.7	0	NA	0.25	0.166667
chr11.1037837	26.1975	0.0144518	-	promoter	South_shore	MUC6	NM_005961	4588	NA	0.545455	0.375	NA	0.777778	0.8	NA	0.961538	1	0.75	0.297297	1	1	1	1	0.8	1	0.571429	NA	1
chr19.1038475	18.1244	0.00459774	+	utr3	North_shore	ABCA7	NM_019112	10347	0.030303	0.133333	0.0666667	0	0.37037	0.1	0	0.037037	0.190476	0.176471	0.0526316	0.492958	0.291667	0.272727	0.288889	0.469388	0.133333	0.125	0.190476	0.142857
chr5.1052071	8.53775	0.0486408	+	utr3	North_shore	ABCA7	NM_019112	10347	0	0.119048	0.125	0.25	0.0740741	0.388889	0	0.0512821	0.3	0.129032	0.111111	0.285714	0.263158	0.05	0.222222	0.2	0.155556	0.241379	0.125	0.211268
chr12.1059333	-5.98617	0.0160474	+	promoter	Cpg_island	RAD52	NM_134424	5893	0	0.0714286	NA	NA	0	0	NA	0.037037	0	0.0666667	0.191489	0	0	0	0	0	0	0	0	0
chr5.1063384	23.3024	0.00476503	+	promoter	North_shore	SLC12A7	NM_006598	10723	0.692308	0.521739	0.615385	0.2	0.5	0.583333	NA	0.742857	0.761905	0.56	0.648936	1	0.653061	0.730769	0.846154	0.962963	0.725	0.5625	0.888889	0.757576
chr5.1063392	8.75378	0.0357753	-	promoter	North_shore	SLC12A7	NM_006598	10723	0.925	0.807692	0.952381	1	0.8	NA	NA	0.695652	0.857143	0.789474	0.862069	1	0.88	0.923077	1	1	0.882353	0.9	0.857143	0.875
chr5.1063417	18.2036	0.0184642	-	promoter	North_shore	SLC12A7	NM_006598	10723	0.275	0.807692	0.666667	1	0.827586	NA	NA	0.782609	0.571429	0.736842	0.896552	1	0.958333	1	0.888889	0.933333	0.823529	0.95	1	0.6
chr5.1063538	3.40888	0.0393547	-	promoter	North_shore	SLC12A7	NM_006598	10723	1	0.818182	1	1	0.925926	1	NA	0.952381	1	1	1	1	1	1	1	1	1	1	NA	1
chr5.1063554	-4.13856	0.0447757	+	promoter	North_shore	SLC12A7	NM_006598	10723	1	1	0.8	1	1	1	1	1	1	1	1	1	1	1	0.851852	0.935484	1	0.875	1	0.962963
chr7.1063714	14.1093	0.0291567	+	promoter	South_shore	MIR339	NR_029898	442907	0.764706	0.888889	0.888889	NA	0.821429	0.916667	0.4	0.714286	0.9	1	1	1	1	1	1	NA	1	0.777778	1	0.761905
chr19.1064409	18.5658	0.0409786	+	promoter	North_shore	ABCA7	NM_019112	10347	0.777778	0.636364	0.727273	0.6	0.555556	0.454545	0.647059	0.428571	0.5	0.648649	0.797101	0.945652	0.604167	0.7	1	1	0.533333	0.666667	0.8	0.363636
chr19.1064939	2.21458	0.0443471	-	promoter	Cpg_island	ABCA7	NM_019112	10347	0	0	0	0	0	0	NA	0	0	0	0	0	0.105263	0.0526316	0	0	0	0.0487805	0	0
chr19.1065728	-18.3768	0.0122506	+	promoter	North_shore	SLC12A7	NM_006598	10723	0.285714	0.166667	0	0.461538	0.0588235	NA	0.875	NA	0	0.0769231	0.153846	0	0.0652174	0	0	NA	0	0.0769231	0	0
chr19.1069624	4.632	0.0288498	+	promoter	North_shore	HMHA1	NM_012292	23526	0	0	0	0	0	0	0	NA	NA	0	NA	0.15625	0.04	0	0	0	0	0.0714286	0	0
chr19.1071165	-8.13374	0.0365779	-	promoter	Cpg_island	HMHA1	NM_012292	23526	0	NA	0.25	NA	0.153846	0	NA	0	0.222222	0	0	0	0	0	0	NA	0	0	0	0
chr19.1071256	-12.1419	0.0222922	-	utr5	Cpg_island	HMHA1	NM_012292	23526	0.344828	0	0	0.333333	0.166667	0	0	0.130435	0.1	0	0.5	0	0	0	0	0	0.181818	0	0	0
chr19.1071260	-12.0387	0.0248224	-	utr5	Cpg_island	HMHA1	NM_012292	23526	0.344828	0.0454545	0	0	0.5	0	0	0.130435	0.1	0	0.5	0	0	0	0	0	0.181818	0	0	0
chr19.1071262	-11.3211	0.0331572	-	utr5	Cpg_island	HMHA1	NM_012292	23526	0.344828	0	0	0.0833333	0.5	0	0	0.130435	0.0333333	0	0.5	0	0	0	0	0	0.181818	0	0	0
chr17.1083773	4.42173	0.0251775	-	promoter	Cpg_island	ABR	NM_001159746;NM_021962	29	0	0	0	0	0	NA	NA	0	0	0	0	0.0641026	0.0638298	0	0	0.222222	0	0	0	0
chr19.1088326	-15.8465	0.0321795	-	utr3	intercpg	POLR2E	NM_002695	5434	NA	1	1	1	0.8	NA	1	1	1	1	0.9	0.8	1	0.833333	1	0.5	0.777778	0.454545	0.857143	1
chr7.1095291	-14.1225	0.00981282	-	promoter	North_shelf	GPR146	NM_138445	115330	NA	0.714286	0.888889	NA	0.666667	0.785714	0.931034	0.6	0.846154	0.777778	0.837838	0.642857	0.473684	0.555556	0.608696	0.772727	0.636364	0.666667	0.75	0.7
chr7.1096360	17.1404	0.00285489	+	promoter	North_shore	C7orf50	NM_001134396;NM_001134395;NM_032350	84310	0	0	0.125	0.0212766	0.173913	0.0909091	0.222222	0.0526316	0.227273	0.24	0	0.262295	0.272727	0.227273	0.47619	0.259259	0.222222	0.2	0.181818	0.148148
chr7.1096716	-23.9947	0.030213	+	promoter	North_shore	GPR146	NM_138445	115330	1	0.545455	0.2	1	0.466667	0.533333	NA	0.8	0.5625	0.642857	0.461538	0.409091	NA	0.4375	0.4	0.0625	0.652174	0.625	0.307692	0.235294
chr1.1101244	-9.94377	0.0406277	+	promoter	South_shore	MIR429	NR_029957	554210	0.267606	0.170213	0.05	0	0.145985	0.277778	0.769231	0.292683	0.186047	0.1	0.175325	0.0414201	0.0561798	0	0.0810811	0.149254	0.272727	0.0344828	0.0384615	0.0888889
chr1.1101318	20.9828	0.0139171	-	promoter	South_shore	MIR429	NR_029957	554210	0	0.25	0.346154	0	0.0909091	0	NA	0	0.4	0.230769	0.1875	0.415094	0.428571	0.227273	0	0.432432	0.428571	0.444444	0.5	0.333333
chr1.1102563	20.8158	0.0275141	-	promoter	South_shore	MIR200A	NR_029834	406983	0.222222	0.166667	0.375	NA	0.411765	NA	NA	0.578947	0.428571	0.333333	0.153846	1	0.5	0.75	0.214286	0.588235	0.3	0.466667	0.6	0.6
chr1.1102701	-14.0182	0.0235411	-	promoter	South_Shelf	MIR429	NR_029957	554210	1	0.777778	0.6	1	0.95	0.833333	1	0.928571	0.857143	1	1	0.724138	0.916667	0.7	0.777778	0.69697	0.777778	0.833333	NA	0.941176
chr1.1102717	-14.3348	0.0121414	+	promoter	South_Shelf	MIR429	NR_029957	554210	0.980769	0.84	0.916667	1	0.833333	0.846154	1	0.585366	0.966667	1	1	0.862069	0.636364	0.916667	0.838384	0.917808	0.846154	0.5	0.806452	0.764706
chr1.1102822	-6.56559	0.00944425	-	promoter	South_Shelf	MIR200A	NR_029834	406983	1	0.97619	1	1	0.915254	1	1	1	0.956522	0.931034	0.920455	0.907216	0.95	1	0.943396	0.863636	0.942857	0.825	0.828571	0.892308
chr1.1102999	24.1844	0.00256045	+	promoter	South_Shelf	MIR429	NR_029957	554210	0	0.166667	0.166667	0	0	0	0	0	0.181818	0.133333	0	0	0.571429	0.166667	0.75	0.333333	0.214286	0.0833333	0.375	0.419355
chr19.1108025	-13.5139	0.0456978	+	utr3	North_shore	SBNO2	NM_001100122;NM_014963	22904	0.863636	0.25641	0.481481	0.391304	0.326923	0.636364	0.44186	0.692308	0.236842	0.391304	0.568966	0.333333	0.307692	0.6	0.317073	0.333333	0.37931	0.310345	0.310345	0.2
chr5.1112308	3.80484	0.0237833	+	promoter	Cpg_island	SLC12A7	NM_006598	10723	0	0	0	NA	0	0	0	0	0	0	0	0.189189	0.0555556	0.037037	0	0	0	0	0	0
chr1.1114300	-14.4153	0.0116674	-	promoter	North_shore	TTLL10	NM_153254;NM_001130045	254173	1	0.833333	1	NA	1	0.846154	1	0.833333	0.846154	0.851852	1	0.763441	0.571429	0.909091	0.777778	0.625	0.933333	0.9	0.652174	0.925926
chr1.1114324	-8.76102	0.0350609	-	promoter	North_shore	TTLL10	NM_153254;NM_001130045	254173	1	0.828571	0.941176	NA	1	0.923077	1	1	0.846154	0.923077	1	0.893617	1	0.761905	0.944444	0.75	0.933333	0.611111	0.913043	0.928571
chr1.1115129	-19.5772	0.0408343	+	utr5	North_shore	TTLL10	NM_153254;NM_001130045	254173	0.721519	1	0.833333	1	0.947368	0.555556	NA	1	NA	0.857143	1	0.806452	1	0.875	0.344828	0.88	0.666667	0.5	0.4	0.666667
chr1.1115187	-18.9104	0.0292536	+	utr5	North_shore	TTLL10	NM_153254;NM_001130045	254173	0	0.0952381	0.428571	0.352941	0.214286	0.238095	0.869565	0.5625	0.466667	0.190476	0.473684	0.215909	0.142857	0.217391	0.0196078	0.111111	0	0.0869565	0.142857	0
chr1.1115425	-18.2907	0.0321476	-	utr5	North_shore	TTLL10	NM_153254;NM_001130045	254173	0.363636	NA	0.40625	0.365079	0.529412	0.545455	0	1	0.533333	0.357143	0.658537	0.444444	0.333333	0	0.176471	0.349206	0.5	0.181818	0.166667	0.6
chr1.1120892	17.1988	0.0015159	+	utr3	intercpg	TTLL10	NM_153254;NM_001130045	254173	0.142857	0.186047	0.117647	0	0.194444	0.1	0	0.0833333	0.142857	0.1875	0.16	0.384615	0.487179	0	0.326923	0.209302	0.421053	0.2	0.230769	0.25641
chr16.1128306	20.553	0.028582	+	promoter	Cpg_island	SSTR5	NM_001172560;NM_001053	6755	NA	0.363636	0.217391	0	0.230769	0.181818	0	0.0909091	0.263158	0.3	0.348837	0.734694	0.533333	0.416667	0.2	0.166667	0.833333	0.5	0.444444	0.142857
chr16.1128376	17.4341	0.025441	-	promoter	Cpg_island	LOC146336	NR_027242	146336	0	0.277778	0.111111	0	0.173913	NA	NA	0	0.129032	0.228571	0.0958904	0.655172	0.241379	0.0714286	0.458333	0.45	0.0625	0.142857	0.413793	0.235294
chr16.1130241	36.3958	0.0132778	+	promoter	Cpg_island	LOC146336	NR_027242	146336	0.904762	0.4	0.444444	0	0.333333	0.666667	NA	0.857143	0.692308	0.818182	0	1	1	0.333333	1	0.75	0.666667	1	1	0.857143
chr16.1130433	14.1842	0.0126937	-	promoter	South_shore	LOC146336	NR_027242	146336	0.84	0.627907	0.925926	0.84	0.791045	0.529412	NA	0.56	0.72973	0.939394	0.790984	0.94186	1	0.957447	1	0.826087	0.92	0.882353	0.9	0.653846
chr19.1132372	-9.93164	0.0037284	+	promoter	intercpg	SBNO2	NM_001100122;NM_014963	22904	0	0.0666667	0	0.117647	0	0.1	0.3	0.192308	0	0.0769231	0.175439	0	0	0	0	0	0	0	0.05	0
chr19.1132420	-17.4577	0.00250277	+	promoter	intercpg	SBNO2	NM_001100122;NM_014963	22904	0	0.214286	0	0.529412	0.125	0.2	0.307692	0.291667	NA	0.153846	0.309091	0	0.0714286	0.03125	0.0416667	0	0	0.111111	0.15	0
chr19.1132442	-4.43393	0.0250524	+	promoter	intercpg	SBNO2	NM_001100122;NM_014963	22904	0	0.133333	0	0	0.166667	0.1	0	0.115385	0	0	0	0	0	0	0	0	0	0	0	0
chr7.1133171	16.295	0.0404095	-	utr3	Cpg_island	C7orf50	NM_001134396;NM_001134395;NM_032350	84310	0.391304	NA	0.470588	0.6875	1	NA	NA	1	0.954545	0.6	0.944444	1	0.75	1	1	1	1	NA	0.944444	0.909091
chr7.1133186	8.01793	0.0129946	+	utr3	Cpg_island	GPER	NM_001505;NM_001098201;NM_001039966	2852	0	0	0	0	0.04	0	0	0	0	0.0625	0	0.32	0	0.0769231	0.0833333	0.0363636	0	0.0833333	0	0.0952381
chr16.1139244	19.4374	0.00109066	+	utr3	North_shore	C1QTNF8	NM_207419	390664	NA	0.125	NA	NA	0	0	0	0	0.142857	0	0	0.25	0	0.0833333	0	0.307692	0.384615	0	0.222222	0.333333
chr16.1139744	9.56196	0.00893668	-	utr3	Cpg_island	C1QTNF8	NM_207419	390664	0	0	0	0	0	0	0	0	0	0	0	0.5	0	0	0	0.0645161	0.2	0.2	0	0
chr16.1140302	17.21	0.0407939	+	utr3	South_shore	C1QTNF8	NM_207419	390664	0.0666667	0.444444	0.545455	NA	0.512195	0.333333	NA	0.421053	0.368421	0.55	0.537313	0.870968	0.380952	NA	0.6875	0.615385	0.5625	0.4	0.454545	0.590909
chr1.1142616	-22.4919	0.0463527	-	promoter	South_shore	TNFRSF18	NM_148901;NM_004195;NM_148902	8784	0.5	0.461538	0.733333	1	0.232558	0.714286	1	0.461538	0.333333	0.153846	0.6	0.444444	0.571429	0.3	0.285714	0	0.315789	0.117647	0.3	0.625
chr1.1143760	-6.97938	0.0122995	-	promoter	North_shore	TNFRSF18	NM_148901;NM_004195;NM_148902	8784	0	0.0238095	0.0909091	0	0.0410959	0.0769231	0	0.382979	0.05	0.130435	0.129032	0.0103093	0	0.05	0	0	0	0	0	0
chr1.1143837	7.96493	0.00758336	+	promoter	North_shore	TNFRSF18	NM_148901;NM_004195;NM_148902	8784	0	0	0	0	0	0	0	0	0	0	0	0.159091	0.333333	0	0	0	0	0.125	0	0.176471
chr16.1146614	23.8008	0.020586	+	promoter	South_Shelf	C1QTNF8	NM_207419	390664	0.5	0.153846	NA	NA	0	0.2	NA	0.142857	0.142857	0.111111	0.103448	0.580645	0.75	0.363636	0.272727	0.5	0	0.363636	0.466667	0.5
chr1.1146791	17.9252	0.00731999	+	utr3	Cpg_island	TNFRSF18	NM_148901;NM_004195;NM_148902	8784	0.333333	0.563636	0.333333	0.422222	0.730337	0.375	0.0714286	0.25	0.333333	0.52	0.464052	0.554545	0.65	0.484848	0.653061	0.553846	0.584615	0.589744	0.702128	0.605263
chr1.1146853	10.9235	0.0191122	-	utr3	Cpg_island	TNFRSF4	NM_003327	7293	0.727273	0.892857	0.869565	0.727273	0.916667	NA	0.444444	0.68	0.958333	0.909091	0.93	1	0.945946	0.947368	1	0.769231	0.941176	0.8125	0.961538	0.952381
chr16.1147799	15.0056	0.010465	+	promoter	South_Shelf	C1QTNF8	NM_207419	390664	0.166667	0	0	NA	0.047619	0.222222	0.266667	0	0.133333	0.133333	0	0.21875	0.166667	0.142857	0.235294	0.190476	0	NA	0.333333	0.347826
chr16.1148104	16.3406	0.04619	+	promoter	intercpg	C1QTNF8	NM_207419	390664	0	0	0.333333	0	0.113208	0.6	0.428571	0.2	0.2	0.277778	0.0408163	0.151515	0.272727	0.222222	0.268293	0.578947	0.25	0.153846	0.416667	0.571429
chr1.1152777	22.4179	0.0154876	-	utr3	Cpg_island	SDF4	NM_016547;NM_016176	51150	1	0.6	0.666667	NA	0.55	0.7	NA	0.7	0.75	0.833333	0.464286	1	0.857143	1	1	0.73913	1	1	0.583333	0.818182
chr20.1165385	-1.90171	0.0296165	+	promoter	Cpg_island	C20orf46	NM_018354	55321	0	0	0	0	0.0357143	0	0	0	0	0.047619	0.047619	0	0	0	NA	0	0	0	0	0
chr20.1165521	5.0179	0.0418916	-	promoter	Cpg_island	C20orf46	NM_018354	55321	0	0	0	0	0	0	0	0	0	0	0	0.4	0.025	0	0	0	0	0	0.0714286	0
chr1.1168773	-12.3333	0.0067349	+	promoter	Cpg_island	B3GALT6	NM_080605	126792	1	1	1	1	0.962264	1	NA	0.888889	1	1	1	0.772727	0.73913	1	0.615385	0.84	1	1	0.870968	0.882353
chr1.1169394	-8.37884	0.0322618	+	promoter	South_shore	B3GALT6	NM_080605	126792	0.75	1	1	1	0.924242	0.909091	1	1	0.888889	0.95122	0.989247	0.945946	0.7	1	0.625	0.787234	1	0.914286	0.903226	0.862069
chr1.1169687	-6.68932	0.0224684	-	utr3	South_shore	SDF4	NM_016547;NM_016176	51150	1	0.942029	1	1	1	1	1	0.954545	0.958333	1	1	1	0.8	1	0.842105	0.888889	0.913043	0.814815	0.821429	1
chr1.1169709	10.5328	0.00495127	+	utr3	South_shore	SDF4	NM_016547;NM_016176	51150	0.125	0	0	0	0.0151515	0	0	0	0	0	0.0408163	0.243243	0.111111	0.1	0.351351	0.166667	0.0731707	0.0454545	0	0.0243902
chr17.1172964	-5.14666	0.0496524	+	promoter	North_shore	BHLHA9	NM_001164405	727857	0.961538	0.95	1	1	0.949153	0.857143	NA	1	0.964286	1	1	0.886792	0.866667	1	0.972222	0.928571	0.785714	1	1	0.818182
chr17.1173021	9.76345	0.0152922	+	promoter	North_shore	BHLHA9	NM_001164405	727857	0.0333333	0.136364	0.142857	0	0.0166667	0	NA	0	0.0344828	0.047619	0.0277778	0.2	0.363636	0.153846	0.0277778	0	0.363636	0.133333	0.1	0.0571429
chr1.1182097	-12.5334	0.010404	-	utr5	Cpg_island	FAM132A	NM_001014980	388581	0.333333	0.0714286	NA	0	0.0952381	0	0	0.2	0	0	0.533333	NA	0	0	0	0	0	0	0	0
chr1.1182177	-4.2636	0.0191153	-	promoter	Cpg_island	FAM132A	NM_001014980	388581	0	0.111111	0	0	0	0.2	NA	0	0.125	0	0.031746	0	0	0	0	0	0	NA	0	0
chr1.1182215	2.42682	0.00631916	+	promoter	Cpg_island	FAM132A	NM_001014980	388581	NA	0	0	0	0	0	0	0	0	0	0	0.0571429	0	0	0.0526316	0.030303	0	0	0	0
chr1.1182226	5.3559	0.000261665	+	promoter	Cpg_island	FAM132A	NM_001014980	388581	NA	0	0	0	0	0	0	0	0	0	0	0.0434783	0	0	0.133333	0.0454545	0.0666667	0	0.111111	0
chr1.1182231	3.79313	0.0276193	+	promoter	Cpg_island	FAM132A	NM_001014980	388581	NA	0	0	0	0	0	0	0	0	0	0	0	0	0.2	0.133333	0.0454545	0	0	0	0
chr1.1182232	-3.35494	0.0381893	-	promoter	Cpg_island	FAM132A	NM_001014980	388581	0	0.157895	0.125	0	0	0	0	0	0	0	0.0232558	0	0	0	0	0	0	0	0	0
chr1.1182448	5.77824	0.0311677	+	promoter	Cpg_island	FAM132A	NM_001014980	388581	0	0	0	0	0	0	0	0	0	0	0	0	0.125	0	0.28	0	0	0.0909091	0	0
chr1.1189491	-5.89517	0.0372784	-	utr3	Cpg_island	UBE2J2	NM_194457;NM_194458;NM_058167;NM_194315	118424	1	0.909091	1	NA	1	1	1	NA	1	1	1	1	0.857143	0.928571	0.909091	0.857143	1	1	1	0.85
chr1.1189576	-8.47764	0.0353374	-	utr3	Cpg_island	UBE2J2	NM_194457;NM_194458;NM_058167;NM_194315	118424	1	0.958333	1	1	1	0.777778	0.9375	1	0.846154	0.941176	1	0.880597	0.714286	1	0.9	0.767442	1	1	0.882353	0.769231
chr1.1189604	-10.6796	0.0147886	+	utr3	Cpg_island	UBE2J2	NM_194457;NM_194458;NM_058167;NM_194315	118424	1	0.916667	0.944444	0.782609	0.962264	0.833333	1	1	0.76	0.95	1	0.842105	0.714286	0.928571	0.857143	0.925	0.823529	0.923077	0.84	0.677419
chr1.1189612	8.64344	0.0331524	+	utr3	Cpg_island	UBE2J2	NM_194457;NM_194458;NM_058167;NM_194315	118424	0	0	0	0	0.037037	0.333333	0	0	0.037037	0.05	0	0.220779	0	0.421053	0.0508475	0.0666667	0	0.153846	0.2	0
chr1.1189782	-16.7644	0.0406206	-	utr3	Cpg_island	UBE2J2	NM_194457;NM_194458;NM_058167;NM_194315	118424	NA	0.888889	1	1	0.878378	0.8	NA	1	0.980392	1	1	0.875	0.4	NA	1	1	0.285714	0.5	0.75	0.9
chr1.1189859	6.82126	0.0126953	+	utr3	Cpg_island	UBE2J2	NM_194457;NM_194458;NM_058167;NM_194315	118424	0.907692	0.916667	0.916667	1	0.824324	0.705882	1	0.806452	0.871795	0.866667	0.803109	0.969697	0.891892	0.883721	0.967742	0.90625	1	0.863636	0.974359	0.907216
chr5.1200458	-20.1519	0.0409842	+	promoter	North_shore	SLC6A19	NM_001003841	340024	1	0.818182	0.666667	NA	0.857143	0.625	1	0.9	0.928571	0.944444	0.764706	0.372093	0.777778	0.941176	0	0.638298	0.777778	0.625	0.666667	0.916667
chr5.1201705	-28.5404	0.0240341	+	promoter	Cpg_island	LOC100130872	NR_024569	100130872	1	0.2	0.571429	0.5	0.380952	0.6	1	0.294118	NA	0.3125	0.3	0	0.411765	0.454545	NA	0.147059	0.230769	0.6	0	0.2
chr16.1201801	19.4078	0.0294888	+	promoter	North_shore	CACNA1H	NM_001005407;NM_021098	8912	0.8	0.555556	0.666667	0.318182	0.782609	0.818182	NA	0.352941	0.684211	0.611111	0.96875	0.75	1	0.6	0.954545	1	0.684211	1	0.833333	0.909091
chr16.1202546	-6.09142	0.0400464	-	promoter	Cpg_island	CACNA1H	NM_001005407;NM_021098	8912	0	NA	0	0	0.111111	NA	0	0	0.4	0	0.142857	0	0	0	0	0	0	0	0	0
chr16.1202981	4.70224	0.0478629	-	promoter	Cpg_island	CACNA1H	NM_001005407;NM_021098	8912	0	0	0	0	0	0	0	0	0	0	0	0.166667	NA	0	0	0.2	0	0	0	0
chr16.1203218	5.48059	0.0223497	-	promoter	Cpg_island	CACNA1H	NM_001005407;NM_021098	8912	0	0	0	0	0	0	0	0	0	0	0	0	0.307692	0.0833333	0	0.0909091	0	0	0	0
chr19.1206652	6.47986	0.0233765	+	utr5	Cpg_island	STK11	NM_000455	6794	0	0	0	0	0	0	0	0	0	0	0	0.142857	0	0	0.4	0	0	0	0	0.0344828
chr1.1215448	8.90578	0.0232307	+	promoter	intercpg	SCNN1D	NM_002978;NR_037668;NM_001130413	6339	0.0819672	0	0	0.136364	0.125	NA	0	NA	0	0.115385	0	0.227979	0.25	NA	0.163636	0.109589	0	0	0	0.0909091
chr19.1227711	6.08081	0.0133239	+	utr3	Cpg_island	STK11	NM_000455	6794	0	0.025641	0	0	0.025641	0.0714286	0	0	0	0.0333333	0	0.190909	0	0.0384615	0.183099	0.145455	0.0722892	0	0.0697674	0
chr19.1227892	-12.5216	0.0292137	+	utr3	Cpg_island	STK11	NM_000455	6794	1	1	0.833333	1	0.814815	1	1	1	1	1	0.947368	0.888889	0.954545	0.866667	0.423077	0.833333	1	0.833333	0.818182	0.894737
chr19.1227907	-10.8443	0.000951415	+	utr3	Cpg_island	STK11	NM_000455	6794	1	1	1	1	1	1	1	1	1	1	1	0.972222	1	0.875	0.807692	0.583333	1	0.846154	0.916667	0.947368
chr19.1227914	-10.0502	0.0439935	+	utr3	Cpg_island	STK11	NM_000455	6794	1	1	1	0.723404	1	1	1	1	0.8	1	1	0.916667	0.954545	1	0.807692	0.833333	1	0.857143	0.916667	0.736842
chr19.1227924	-18.2441	0.0458596	+	utr3	Cpg_island	STK11	NM_000455	6794	1	0.727273	0.388889	1	0.653846	1	1	0.833333	0.8	0.666667	0.741379	0.888889	0.727273	0.5625	0.576923	0.333333	0.6	0.642857	0.75	0.631579
chr19.1229993	13.5047	0.0306902	-	utr3	Cpg_island	C19orf26	NM_152769	255057	1	0.894737	0.6	NA	0.73913	1	NA	NA	0.923077	1	0.52381	1	0.956522	1	1	1	0.833333	1	0.888889	NA
chr19.1230087	-11.1912	0.000189647	-	utr3	Cpg_island	C19orf26	NM_152769	255057	1	1	0.944444	1	0.982143	0.866667	1	0.942857	0.909091	0.928571	0.99005	0.905882	0.777778	0.772727	0.875	0.737705	0.90625	0.952381	1	0.833333
chr19.1239909	-31.0502	0.0148395	-	promoter	North_shore	ATP5D	NM_001001975;NM_001687	513	0.866667	0.416667	NA	0.894737	0.846154	1	NA	1	0.555556	0.916667	0.857143	0.428571	0.703704	0.416667	0	0.875	0	0.916667	0.416667	0.5
chr19.1239977	-14.7798	0.0430537	-	promoter	North_shore	ATP5D	NM_001001975;NM_001687	513	0.733333	0.909091	NA	1	0.923077	1	NA	1	0.875	1	1	0.52381	0.823529	0.714286	1	1	0.571429	0.909091	0.666667	0.666667
chr19.1240041	27.1004	0.0316259	-	promoter	North_shore	C19orf26	NM_152769	255057	0.333333	0.388889	0.0909091	0	0.65	NA	0	0.125	0	0.142857	0.0952381	0.814815	0.222222	0.333333	1	0.277778	0.272727	0.125	0.25	0.307692
chr19.1241082	19.1435	0.0335472	-	promoter	North_shore	ATP5D	NM_001001975;NM_001687	513	NA	1	0.857143	NA	0.888889	0.857143	0.833333	0.75	0.866667	0.714286	0.380952	1	0.807692	1	1	1	0.333333	NA	1	1
chr19.1241799	3.21795	0.0208309	-	utr5	Cpg_island	ATP5D	NM_001001975;NM_001687	513	0	0	0	0	0	0	0	0	0	0	0	0.0851064	0	0.111111	0	0	0	0	0.1	0
chr11.1244304	14.0562	0.0249162	+	utr5	North_shelf	ACAP3	NM_030649	116983	0	0	0	NA	0.137931	0	NA	NA	0.25	0.125	0.157895	0.428571	NA	0	0.258065	0	0.166667	0.2	0.411765	0.166667
chr1.1244472	7.8419	0.0115597	-	promoter	Cpg_island	PUSL1	NM_153339	126789	0	0	0	NA	0	0	NA	0	0	0	0	0.129032	0	0.166667	0.0833333	0	0	0	0.352941	0
chr1.1244479	16.4805	0.00642254	-	promoter	Cpg_island	ACAP3	NM_030649	116983	0	0	0	NA	0	0	NA	0	0	0	0	0.290323	0	0	0.5	0.259259	NA	0	0	0.117647
chr1.1244540	3.23066	0.00236815	+	promoter	Cpg_island	PUSL1	NM_153339	126789	0	0	0	0	0	0	0	0	0	0	0	0.027027	0	0	0	0.0425532	0.0285714	0.111111	0.125	0
chr1.1244541	6.68791	0.0185974	-	promoter	Cpg_island	PUSL1	NM_153339	126789	0	0	0	0	0	0	0	0	0	0.0833333	0	0.222222	0.0645161	0	0.156522	0	0.097561	0	0.0512821	0
chr1.1244557	4.987	0.0352049	+	promoter	Cpg_island	PUSL1	NM_153339	126789	0	0	0.181818	0	0	0	0	0	0	0	0	0.0273973	0.0666667	0	0	0.0212766	0.0571429	0	0	0.269231
chr1.1244796	24.1061	0.0221618	-	promoter	Cpg_island	ACAP3	NM_030649	116983	0	0	0.0769231	0	0	NA	NA	0	0.142857	0.111111	0	1	0.157895	0	0	0.0625	0.1	0.333333	0.333333	1
chr19.1244814	7.01771	0.0270116	+	utr3	North_shelf	ATP5D	NM_001001975;NM_001687	513	0	0	0	NA	0	0	0	0	0	0	0	0.344828	0	0	0	0.0833333	0	0	0	0.0967742
chr1.1244842	9.71725	0.0207944	-	promoter	Cpg_island	ACAP3	NM_030649	116983	0.0754717	0.230769	0.0588235	0	0.175258	0.266667	0	0	0.0882353	0.129032	0.113043	0.201754	0.166667	0.15625	0.306667	0.097561	0.0882353	0.1875	0.212121	0.26
chr1.1248089	-10.0217	0.0112006	+	promoter	Cpg_island	CPSF3L	NM_017871	54973	1	0.727273	1	1	1	1	1	0.888889	0.9	1	1	0.821429	NA	0.894737	0.954545	0.846154	0.769231	1	0.933333	0.9
chr1.1249386	22.6809	0.011582	-	promoter	South_shore	CPSF3L	NM_017871	54973	0.560976	0.533333	0.357143	0.235294	0.62069	0.666667	NA	0	0.645161	0.590909	0.777778	0.927273	0.806452	0.695652	0.606061	0.65625	0.611111	0.695652	0.758621	0.8
chr19.1250243	-5.17103	0.0298184	-	utr5	Cpg_island	MIDN	NM_177401	90007	0	0.111111	0.1	0	0	0	0.4	0	0	0.2	0	0	0	0	0	0	0	0	0	0
chr19.1250244	7.6309	0.0292697	+	utr5	Cpg_island	MIDN	NM_177401	90007	0	0	0	0	0	0	0	0	0	0	0	0.389831	0.222222	0	0	0	0	0	0.0714286	0
chr8.1251981	20.9124	0.00836125	+	promoter	intercpg	LOC286083	NR_033895	286083	0.363636	0.828571	0.533333	0.6	0.6	0.5	NA	0.5625	0.692308	0.647059	0.746269	0.846154	1	0.766667	1	1	0.857143	0.857143	0.538462	0.55
chr5.1253704	-13.4934	0.0439895	+	utr3	North_shore	TERT	NM_001193376;NM_198253	7015	0.666667	0.666667	0.5	NA	0.660377	NA	1	0.4375	0.6	0.625	0.705882	0.5	0.318182	0.384615	0.392857	0.586957	0.857143	0.608696	0.64	0.461538
chr5.1253834	-17.02	0.0251596	-	utr3	Cpg_island	TERT	NM_001193376;NM_198253	7015	NA	0.866667	0.75	1	0.571429	0.714286	NA	1	0.9	0.709677	0.805195	0.513514	0.517241	0.857143	0.576923	0.655172	0.75	0.727273	0.545455	0.822581
chr19.1257293	-7.94983	0.0109288	+	utr3	Cpg_island	MIDN	NM_177401	90007	1	1	1	1	0.947368	NA	NA	NA	1	1	0.96875	1	0.9	0.833333	1	1	0.833333	0.833333	1	0.818182
chr1.1258615	-17.3546	0.0346814	+	utr5	North_shore	GLTPD1	NM_001029885	80772	1	1	NA	1	0.666667	0.833333	0.952381	0.75	0.4	0.727273	1	0.85	0.625	0.545455	0.6	0.823529	0.9	0.5	0.7	0.548387
chr19.1259015	14.4619	0.0405533	+	utr3	North_shore	MIDN	NM_177401	90007	0.645161	0.0967742	0.0666667	0	0.125	0.1	0	0.15	0	0.133333	0.150943	0.174419	0	0.285714	0.45098	0.384615	0.166667	0.266667	0.2	0.193548
chr1.1261348	-22.4164	0.0378092	-	promoter	North_shore	GLTPD1	NM_001029885	80772	0.904762	0.545455	0.7	0.733333	0.52381	0.666667	NA	NA	0.272727	0.363636	0.3	0.1875	0.416667	0.5	0	0.483871	0.2	0.571429	0.5	0.0769231
chr1.1263361	5.2438	0.0442605	+	utr3	Cpg_island	TAS1R3	NM_152228	83756	NA	0	0	0	0	0	0	0	0	0	0	0.018018	0	0	0	0	0	0.258065	0.272727	0
chr1.1266657	-11.3771	0.0414999	+	promoter	North_shore	TAS1R3	NM_152228	83756	0	0	0.0909091	1	0.04	0.0833333	0	0	0.125	0	0.142857	0	0	0	0	0	0.0909091	0	0	0
chr19.1274543	-23.575	0.00388609	-	promoter	Cpg_island	C19orf23	NR_027271	148046	1	1	1	0.769231	0.95	0.833333	0.777778	1	NA	0.428571	1	0.71875	0.8	0.4	0.526316	0.588235	0.823529	NA	0.75	0.714286
chr19.1274715	-20.1076	0.00273333	-	promoter	Cpg_island	C19orf24	NM_017914	55009	0.761905	0.833333	0.714286	NA	0.962264	0.818182	1	0.947368	0.724138	0.8	0.820896	0.679487	0.647059	0.636364	0.883721	0.545455	0.65	0.272727	0.722222	0.666667
chr19.1275133	1.85876	0.0328529	-	promoter	Cpg_island	C19orf23	NR_027271	148046	0	0	0	0	0	0	0	0	0	0	0	0	0.0740741	0.0285714	0	0	0	0	0	0.0588235
chr11.1275954	-8.90414	0.0492643	-	promoter	South_shore	MUC5B	NM_002458	727897	1	0.875	1	1	1	1	0.857143	1	1	0.961538	0.95122	1	0.935484	0.771429	1	0.829268	0.891892	0.933333	1	0.6
chr11.1276724	-15.2511	0.00987728	+	promoter	South_Shelf	MUC5B	NM_002458	727897	NA	0.909091	1	1	0.724138	NA	1	1	1	0.928571	1	NA	0.76	0.88	0.590909	0.818182	0.928571	0.909091	0.923077	0.823529
chr4.1282430	10.2623	0.0359397	+	promoter	North_shore	MAEA	NM_001017405;NM_005882	10296	0.333333	0.828571	0.826087	1	0.831858	0.857143	0.489362	0.793103	0.589286	0.72549	0.838509	0.866071	0.745763	0.897959	0.87931	0.821053	0.914286	0.796875	0.868421	0.830769
chr11.1283165	20.281	0.0248493	+	utr3	intercpg	MUC5B	NM_002458	727897	0.133333	0.2	0.0833333	0	0.166667	0.0833333	0	0	0.322581	NA	0.393443	0.525	0.285714	0	0.111111	0.30303	0.375	0.714286	0.333333	0.526316
chr11.1283169	24.1732	0.00312476	+	utr3	intercpg	MUC5B	NM_002458	727897	0.133333	0.12	0.0833333	0	0.152778	0.0833333	0	0	0.25	NA	0.387097	0.45	0.285714	0	0.259259	0.333333	0.483871	0.571429	0.416667	0.473684
chr11.1283171	23.5635	0.00685609	+	utr3	intercpg	MUC5B	NM_002458	727897	0.133333	0.16	0.0833333	0	0.166667	0.166667	0	0	0.1875	NA	0.387097	0.525	0.285714	0	0.185185	0.333333	0.5	0.714286	0.416667	0.421053
chr11.1283178	17.9998	0.0192777	+	utr3	intercpg	MUC5B	NM_002458	727897	0.133333	0.2	0.0833333	0	0.166667	0.0833333	0	0	0.25	NA	0.387097	0.417722	0.285714	0	0.185185	0.242424	0.25	0.571429	0.416667	0.421053
chr11.1283195	22.6125	0.00809789	+	utr3	intercpg	MUC5B	NM_002458	727897	0.133333	0.12	0	0	0.166667	0.0833333	0	0	0.1875	NA	0.387097	0.45	0.285714	0	0.185185	0.242424	0.5	0.571429	0.25	0.526316
chr19.1284179	-13.4466	0.0438686	+	promoter	North_shelf	EFNA2	NM_001405	1943	1	1	0.888889	1	1	1	1	1	0.5	1	1	0.733333	0.666667	0.466667	1	1	0.916667	0.714286	1	0.882353
chr1.1284986	2.52897	0.0492156	+	promoter	Cpg_island	DVL1	NM_004421	1855	0	0	0	0	0	0	NA	0	0	0	0	0.107143	NA	0	0	0	0	0	0	0.0384615
chr19.1285327	-14.1845	0.0225131	-	promoter	North_shelf	EFNA2	NM_001405	1943	0.777778	0.0851064	0.0625	0.214286	0.193277	0.25	0.380952	0.316667	0.285714	0.222222	0.415205	0.147727	0.133333	0.21875	0.173077	0.0322581	0.176471	0.05	0.111111	0.108434
chr19.1285447	2.45189	0.0205603	+	promoter	North_shore	EFNA2	NM_001405	1943	0	0	0	NA	0.0540541	0	0	0	0	0	0	0	0.0677966	0.0294118	NA	0.0277778	0.0294118	0	0.0298507	0
chr19.1285536	9.75391	0.0447193	+	promoter	North_shore	EFNA2	NM_001405	1943	NA	0.0714286	0.181818	0	0.166667	0	0	0.0769231	0.0689655	0.108108	0.174312	0.315789	0.0666667	0.0645161	0.571429	0.184211	0.0909091	0.173913	0.19403	0.116505
chr1.1288927	9.34912	0.0401344	-	utr3	North_shore	DVL1	NM_004421	1855	0	0.141026	0.116279	0	0.130435	0.153846	0	0.319149	0.0819672	0.0666667	0.184615	0.0615385	0.125	0.236364	0.152174	0.308824	0.135593	0.283019	0.183673	0.16129
chr16.1289079	26.3773	0.00188054	-	promoter	intercpg	TPSAB1	NM_003294	7177	0	0.285714	0.428571	0.0909091	0.263158	0.454545	NA	0	0.272727	0.181818	0.0930233	0.3	0.571429	0.4	0.529412	0.36	0.5	0.428571	0.333333	0.4
chr16.1289591	-16.5905	0.0271928	-	promoter	intercpg	TPSAB1	NM_003294	7177	NA	0.636364	0.62963	1	0.875	0.7	1	0.846154	0.842105	0.833333	0.757576	0.712766	0.461538	0.409091	0.757143	0.755102	0.52381	0.703704	0.916667	0.590909
chr5.1295352	0.832224	0.0226043	+	promoter	Cpg_island	TERT	NM_001193376;NM_198253	7015	0	0	0	0	0	0	0	0	0	0	0	0.0135135	0	0	0	0.0263158	0	0	0.03125	0
chr5.1295725	7.92873	0.009359	+	promoter	Cpg_island	EFNA2	NM_001405	1943	0	0	0	0	0.0769231	0	0	0.151899	0	0.1	0	0.0948905	0.163934	0.0425532	0.125	0.0277778	0.177215	0	0.0461538	0.0645161
chr5.1295738	13.9903	0.00924595	-	promoter	Cpg_island	TERT	NM_001193376;NM_198253	7015	NA	0.103448	0	0	0	0.4	NA	0	0.133333	0	0	0.545455	0.0666667	0.2	0.142857	0.111111	0.114286	0.0555556	0.12	0.122807
chr5.1295753	7.64006	0.0116838	+	promoter	Cpg_island	TERT	NM_001193376;NM_198253	7015	0	0.0666667	0	0	0.09375	0.0666667	0	0.025	0.0571429	0.03125	0.0078125	0.168539	0.294118	0.111111	0.208333	0	0.0232558	0.148148	0.0555556	0.0645161
chr5.1295754	7.67368	0.0297135	-	promoter	Cpg_island	TERT	NM_001193376;NM_198253	7015	NA	0.0344828	0	0	0.04	0	NA	0.0789474	0	0	0	0.363636	0.133333	0.04	0	0	0.114286	0.105263	0.12	0.0701754
chr5.1295759	6.51096	0.00860886	+	promoter	Cpg_island	TERT	NM_001193376;NM_198253	7015	0	0.0333333	0	0	0.0461538	0.0666667	0	0	0.0285714	0.03125	0.0390625	0.179775	0.117647	0.037037	0.0833333	0	0.0232558	0.259259	0.0833333	0.0645161
chr5.1295915	12.0625	0.0398559	+	promoter	Cpg_island	TERT	NM_001193376;NM_198253	7015	0	0.0833333	0.111111	0	0.235294	0.133333	0.571429	0.05	0.0625	0.217391	0.0608108	0.368421	NA	0.583333	0.172414	0.272727	0	0.214286	0.1875	0.173077
chr5.1295918	22.293	0.0279404	+	promoter	Cpg_island	TERT	NM_001193376;NM_198253	7015	0	0.416667	0.444444	0	0.588235	0.266667	0	0.102564	0.0625	0.272727	0.246575	0.631579	NA	0.565217	0.301887	0.646154	0.466667	0.285714	0.3125	0.141414
chr1.1297503	-4.55276	0.0226599	-	promoter	intercpg	MXRA8	NM_032348	54587	0	0.0571429	0	0	0.13253	0.0909091	0	0	0.0333333	0.142857	0.0392157	0	0	0	0	0.0625	0	0	0	0
chr11.1297657	-12.3354	0.041844	+	utr3	North_shore	TOLLIP	NM_019009	54472	0.466667	0.229167	0.15	0.0833333	0.438202	0.235294	0.447368	0.173913	0.230769	0.172414	0.40404	0.276316	0.25	0.0909091	0	0.15	0.40625	0.142857	0.136364	0.0877193
chr19.1300224	5.06468	0.0239615	+	utr3	Cpg_island	-	-	-	0	0	0	0	0	NA	0	0	0	0	0	0.1125	0	NA	0	0.230769	0	0	0.0416667	0
chr16.1304625	13.7395	0.0378672	-	promoter	North_shelf	TPSD1	NM_012217	23430	0.64	1	0.777778	0.763158	0.758065	0.5	0.414286	NA	0.714286	0.7	0.689655	0.714286	0.863636	NA	1	0.682927	0.666667	1	0.871795	0.833333
chr6.1312385	2.92878	0.0306011	+	promoter	Cpg_island	FOXQ1	NM_033260	94234	0	0	0	0	0	0	NA	0	0	0	0	0.0461538	0.0416667	0	0	0	0	0	0	0.142857
chr11.1331458	5.90083	0.0195555	-	promoter	Cpg_island	TOLLIP	NM_019009	54472	0	0	0	0	0	0	NA	0	0	0.0689655	0	0.142857	0.037037	0	0.269231	0	0.12	0.0512821	0	0
chr4.1340537	5.79196	0.0378096	+	promoter	Cpg_island	KIAA1530	NM_020894	57654	0	0	0	0	0	0	NA	0	0	0	0	0.317757	0.0909091	0	0	0.0238095	0	0	0	0
chr17.1360016	-4.01007	0.0454065	+	promoter	South_shore	CRK	NM_016823;NM_005206	1398	0	0	0	0	0	0.0909091	0	0.222222	0	0	0.111111	0	0	0	0	0	0	0	0	0
chr17.1360017	-4.54846	0.0490264	-	promoter	South_shore	CRK	NM_016823;NM_005206	1398	0	0.166667	0.166667	0	0.166667	0	0	0	0	0	0	0	0	0	0	0	0	0	0	0
chr17.1361129	-15.3731	0.0345134	+	promoter	South_shore	CRK	NM_016823;NM_005206	1398	1	NA	0.777778	NA	0.761905	1	1	0.6	0.8125	0.833333	1	NA	0.894737	0.666667	0.714286	0.529412	0.846154	0.777778	0.75	0.95
chr17.1361133	-7.402	0.0247738	+	promoter	South_shore	CRK	NM_016823;NM_005206	1398	1	NA	1	NA	0.952381	1	1	1	0.875	1	1	NA	0.947368	0.944444	0.714286	1	0.846154	0.888889	1	0.9
chr17.1361211	12.3163	0.0297548	+	promoter	South_shore	CRK	NM_016823;NM_005206	1398	0	NA	0	NA	0	0	0	0	0.0625	0	0.056338	NA	0.368421	0.333333	0	0	0.0769231	0.222222	0	0.3
chr1.1361480	-16.8824	0.0355623	+	promoter	North_shore	TMEM88B	NM_001146685	643965	0.814815	0.347826	0.419355	0.333333	0.767442	0.368421	0.617647	0.613636	0.517241	0.567568	0.873418	0.307692	0.625	0.47619	0.351351	0.178571	0.409091	0.6	0.444444	0.395349
chr1.1370973	1.3007	0.0212608	+	promoter	Cpg_island	VWA1	NM_022834;NM_199121	64856	0	0	0	0	0	0	0	0	0	0	0	0.026087	0	0	0	0.0454545	0	0	0	0
chr1.1371562	-11.1844	0.0338778	+	promoter	South_shore	VWA1	NM_022834;NM_199121	64856	NA	0.238095	0.1	NA	0	0.142857	NA	0	0.142857	0.0769231	0.333333	0	0.0444444	0	0	0	0.1875	0	0	0.185185
chr1.1371577	-14.5844	0.0369173	+	promoter	South_shore	VWA1	NM_022834;NM_199121	64856	NA	0.238095	0.1	NA	0.15	0.285714	NA	0	0.142857	0.269231	0.333333	0	0.177778	0	0	0	0.375	0.047619	0.208333	0.148148
chr1.1371633	19.5883	0.0146358	+	promoter	South_shore	VWA1	NM_022834;NM_199121	64856	0	0	0.16	0	0.0487805	0.133333	0.533333	0.228571	0.194444	0	0	0.384615	0.333333	0.642857	0.23913	0.130435	0.222222	0.347826	0.047619	0.175439
chr1.1374675	-8.77259	0.0186936	-	utr3	Cpg_island	VWA1	NM_022834;NM_199121	64856	1	0.941176	1	0.764706	0.971429	NA	1	1	0.966667	1	1	1	0.666667	0.75	0.851852	0.888889	0.954545	1	0.909091	0.833333
chr1.1374698	-8.3994	0.0390877	-	utr3	Cpg_island	VWA1	NM_022834;NM_199121	64856	1	0.933333	0.875	0.757576	1	NA	1	1	0.945455	1	1	1	0.636364	0.904762	1	0.735294	0.952381	0.906977	0.9	0.857143
chr1.1375419	8.86278	0.0446522	+	utr3	Cpg_island	VWA1	NM_022834;NM_199121	64856	0.606061	0.607143	0.894737	0.526316	0.761905	0.4	NA	0.352941	0.631579	0.5625	0.652632	0.722222	0.590909	0.75	0.818182	0.580645	0.619048	1	0.777778	0.690476
chr19.1377870	-4.39672	0.0411232	+	utr3	Cpg_island	MUM1	NR_024247;NM_032853	84939	1	1	1	NA	0.958333	1	1	1	1	1	1	0.955882	0.977273	1	1	0.958333	1	0.8125	1	0.789474
chr19.1378024	-18.9789	0.0149877	+	utr3	Cpg_island	MUM1	NR_024247;NM_032853	84939	1	0.8	0.666667	NA	0.954545	0.8	1	1	0.75	0.85	1	0.823529	0.704545	0.684211	1	0.375	0.818182	0.666667	0.5	0.722222
chr16.1382805	6.15147	0.0288097	+	promoter	North_shore	BAIAP3	NM_001199096;NM_003933;NM_001199099;NM_001199097;NM_001199098	8938	0	0	0	0	0	0	0	0	0	0	0	0.192308	0	0	0.186047	0	0	0.05	0	0
chr16.1383070	16.1909	0.0160595	-	promoter	Cpg_island	BAIAP3	NM_001199096;NM_003933;NM_001199099;NM_001199097;NM_001199098	8938	0.428571	0.0952381	0.0588235	0.0952381	0.0217391	0	0	0	0.235294	0	0	0.354839	0.545455	0.333333	0.25	0.34375	0.125	0.153846	0.1	0
chr16.1383808	2.4717	0.0260602	-	promoter	Cpg_island	BAIAP3	NM_001199096;NM_003933;NM_001199099;NM_001199097;NM_001199098	8938	0	0	0	0	0	0	0	0	0	0	0	0.0612245	0.037037	0	0	0	0.125	0	0	0
chr16.1384543	2.17463	0.0308517	+	utr5	Cpg_island	BAIAP3	NM_001199096;NM_003933;NM_001199099;NM_001199097;NM_001199098	8938	0	0	0	0	0	0	0	0	0	0	0	0.0887097	0.0123457	0	0	0.09375	0	0	0	0
chr16.1384572	1.33056	0.0290213	+	utr5	Cpg_island	BAIAP3	NM_001199096;NM_003933;NM_001199099;NM_001199097;NM_001199098	8938	0	0	0	0	0	0	0	0	0	0	0	0.0188679	0.0727273	0	0	0	0	0	0.0333333	0
chr1.1385120	-11.0143	0.0341595	-	utr5	intercpg	ATAD3C	NM_001039211	219293	1	0.666667	1	NA	0.966667	0.916667	1	1	0.88	0.818182	1	0.737705	NA	0.85	1	0.782609	0.75	1	0.833333	0.833333
chr6.1389304	1.87561	0.0178498	+	promoter	Cpg_island	FOXF2	NM_001452	2295	0	0	0	0	0	0	0	0	0	0	0	0.0441176	0.030303	0	0	0	0.0740741	0	0	0
chr6.1389359	4.08989	0.0283235	+	promoter	Cpg_island	FOXF2	NM_001452	2295	0	0	0	0	0	0	0	0	0.0952381	0.05	0	0.0441176	0.030303	0.047619	0	0.166667	0.0740741	0.0740741	0	0
chr6.1389373	5.99682	0.00102022	+	promoter	Cpg_island	FOXF2	NM_001452	2295	0	0	0.04	0	0	0.111111	0	0	0	0	0	0.0441176	0.0606061	0	0.162162	0.0555556	0.148148	0.0740741	0.0357143	0
chr17.1389556	1.52348	0.0340529	+	promoter	Cpg_island	CRIPAK	NM_175918	285464	0	0	0	0	0	0	0	0	0	0	0	0.0877193	0	0	0	0.0222222	0	0.0238095	0	0
chr17.1389603	-6.54339	0.0112698	-	promoter	Cpg_island	MYO1C	NM_001080950;NM_033375;NM_001080779	4641	0	0.0434783	0	0.288136	0.0769231	0.0909091	0	0	0	0.115385	0	0	0	0	0	0	0	0	0	0
chr17.1390105	-23.0324	0.0273452	+	promoter	North_shore	MYO1C	NM_001080950;NM_033375;NM_001080779	4641	NA	0.571429	0.181818	NA	0.538462	0.6	0.333333	NA	0.444444	0.166667	0.818182	0.136364	0	0.285714	0.107143	0.347826	0.8	0.375	0.25	0.166667
chr17.1390559	-2.04174	0.0469034	+	promoter	Cpg_island	MYO1C	NM_001080950;NM_033375;NM_001080779	4641	0.125	0	0	0	0	0	0	0.0416667	0	0	0.0147059	0	0	0	0	0	0	0	0	0
chr17.1390933	-6.3955	0.0347872	+	promoter	North_shore	MYO1C	NM_001080950;NM_033375;NM_001080779	4641	0	0	0.3	0	0.111111	NA	NA	0	0	0.1	NA	0	0	NA	0	0	0	0	0	0
chr6.1392525	12.6315	0.0299199	+	promoter	North_shore	-	-	-	0.0181818	0.030303	0.323529	0.358974	0.171875	0.047619	0.047619	0.05	0.193548	0.275	0.229167	0.333333	0.234375	0.324324	0.430556	0.104651	0.230769	0.357143	0.258065	0.147059
chr17.1395196	-5.23791	0.0154528	+	promoter	Cpg_island	MYO1C	NM_033375;NM_001080779	4641	0	0	0	NA	0.0869565	0.181818	NA	0	0.08	0	0.0851064	0	NA	0	0	0	0	0	0	0.0588235
chr17.1395856	16.4244	0.0384482	-	promoter	South_shore	MYO1C	NM_033375;NM_001080779	4641	0.5	0.708333	0.6	0	0.684211	0.461538	NA	NA	0.666667	0.666667	0.488889	0.776119	0.818182	0.571429	0.809524	1	0.5	0.555556	0.611111	0.857143
chr4.1400350	11.1088	0.0102082	-	promoter	Cpg_island	-	-	-	0	0	0	0	0	0	0	0	0	0	0	0	0.0434783	0.0909091	NA	0	0	0.166667	0	0.75
chr4.1400512	2.87259	0.0155708	+	promoter	Cpg_island	-	-	-	0	0	0	0	0.025	0	0	0	0	0.0555556	0	0	0.0714286	0	0	0.04	0.0612245	0.0588235	0	0.0379747
chr4.1400658	3.84007	0.0274633	+	promoter	Cpg_island	-	-	-	0	0	0	0	0	0	0	0	0	0	0	0	0.0555556	0	0.1875	0	0.153846	0	0	0
chr4.1400690	4.02062	0.00367786	-	promoter	Cpg_island	-	-	-	0	0	0	0	0	0	0	0	0	0	0	0.0454545	0	0.181818	0.0769231	0	0	0	0	0
chr4.1400692	2.79404	0.0193756	-	promoter	Cpg_island	-	-	-	0	0	0	0	0	0	NA	0	0	0	0	0.0444444	0	0	0.0810811	0	0	0	0	0
chr4.1400758	3.75066	0.0156762	-	promoter	Cpg_island	-	-	-	0	0	0	0	0	0	0	0	0	0	0	0.196721	0.015625	0	0	0.0909091	0	0	0	0.031746
chr4.1400771	1.98635	0.0498391	+	promoter	Cpg_island	-	-	-	0	0	0	0	0.0549451	0	0	0	0	0	0	0	0.0166667	0.0263158	0	0	0.0566038	0.02	0.0434783	0.032967
chr4.1400995	10.5148	0.0272017	-	promoter	Cpg_island	-	-	-	0	0	0	NA	0	0	NA	0	0.0769231	0	0	NA	0.157895	0	0.4	0	0	0.214286	0	0.230769
chr4.1401013	11.0737	0.0182999	-	promoter	Cpg_island	-	-	-	0	0	0	NA	0.0833333	0	NA	0	0	0.0588235	0.0769231	NA	0.0526316	0.05	0.466667	0.277778	0.125	0	0.153846	0.115385
chr4.1401532	8.09793	0.0246854	-	promoter	Cpg_island	-	-	-	0	0	0	NA	0	0	NA	0	0	0	0	0	0	0	0.263158	0	NA	0	0.142857	0.238095
chr1.1404526	-17.1302	0.0414148	+	utr3	North_shelf	ATAD3C	NM_001039211	219293	0.714286	0.6	0.75	1	0.744186	0.666667	0.722222	0.428571	0.625	0.75	0.983871	0.6	0.75	NA	0.666667	0.52	0.583333	0.583333	0.652174	0.434783
chr1.1404590	22.2244	0.0208028	+	utr3	North_shelf	ATAD3B	NM_031921	83858	0.404762	0.555556	0.677419	0.447368	0.333333	0.0909091	0.538462	0.333333	0.5	0.675	0.0461538	0.899281	0.48	0.8125	0.795699	0.75	0.551724	0.458333	0.4	0.5
chr19.1406618	14.43	0.0147782	+	promoter	North_shore	DAZAP1	NM_018959;NM_170711	26528	0	0.310345	0.181818	0	0.189189	0.25	0.180328	0.0277778	0.233333	0.195122	0.228916	0.389831	0.375	0.296296	0.348837	0.354167	0.258065	0.111111	0.266667	0.160714
chr11.1409978	13.172	0.0475704	-	promoter	North_shore	BRSK2	NM_003957	9024	0	0.105263	0	0	0.317073	0.166667	0	0.21875	0.214286	0.178571	0.151515	0.09375	0.369565	0.30303	0.130435	0.527778	0.428571	0.129032	0.0526316	0.214286
chr11.1410081	-7.94426	0.0487661	+	promoter	North_shore	BRSK2	NM_003957	9024	0.142857	0.0731707	0.05	0.555556	0.116279	0.1	0.166667	0	0.193548	0.047619	0.0761905	0.0847458	0.0769231	0.130435	0	0.0196078	0	0.0714286	0.0769231	0
chr16.1414777	10.8306	0.01158	-	utr3	Cpg_island	UNKL	NM_001193389;NM_023076;NM_001193388	64718	0.763636	0.95	0.857143	0.785714	0.666667	1	0.6	1	0.913043	0.967742	0.882353	1	1	0.818182	1	1	1	0.972222	0.909091	0.914286
chr16.1420121	-14.0771	0.0427469	+	utr5	North_shore	LOC100306951	NR_028514	100306951	0.916667	0.652174	0.857143	1	0.714286	1	1	1	0.875	0.8	1	0.83871	0.6	NA	0.814815	0.538462	0.9	0.833333	0.777778	0.9
chr16.1420317	6.65885	0.0192072	+	utr5	Cpg_island	UNKL	NM_001193389;NM_023076;NM_001193388	64718	0	0	0	0	0	0.0833333	0	0	0	0.0222222	0	0.295082	0.03125	0.2	0.101266	0.0153846	0	0	0.0833333	0
chr5.1445708	-1.88167	0.039483	+	promoter	Cpg_island	-	-	-	0	0	0	0	0.027027	0	0	0.0740741	0	0.0909091	0	0	0	0	0	0	0	0	0	0
chr5.1446237	2.85758	0.00050683	+	promoter	Cpg_island	SLC6A3	NM_001044	6531	0	0	0	NA	0	0	0	0	0	0	0	0.047619	0.0526316	0.04	0	0	0.0243902	0.0727273	0	0.0298507
chr5.1446876	5.97077	0.0353359	-	promoter	South_shore	SLC6A3	NM_001044	6531	0	0	0	0	0	NA	0	0	0	0	0	0.30303	0.0540541	0	0	0.0526316	0	0	0	0
chr19.1470374	5.03732	0.0399032	-	utr3	Cpg_island	APC2	NM_005883	10297	0	0	0	0	0	0	0	0	0	0	0	0.357143	0.0217391	0	0	0.03125	0	0	0	0
chr19.1470383	6.8835	0.0132496	+	utr3	Cpg_island	APC2	NM_005883	10297	0	0	0	0.266667	0	0	NA	0	0	0	0	0.102564	0.0512821	0.030303	0.137255	0	0.125	0.0217391	0.131579	0
chr19.1470497	1.62822	0.0494066	+	utr3	Cpg_island	APC2	NM_005883	10297	0	0	0	NA	0	NA	NA	0	0	0	0	0	0.0357143	0.04	0	0	0	0.0285714	0	0
chr19.1470498	-5.56084	0.0279544	-	utr3	Cpg_island	APC2	NM_005883	10297	NA	0.047619	0	NA	0	0	0	0	0.15	0	0.204545	0	0	0	0	0	0	0	0	0
chr1.1470731	-8.675	0.0275924	+	utr3	Cpg_island	C1orf70	NM_001114748	339453	1	0.916667	0.962963	1	0.869565	0.923077	1	0.818182	0.9	0.875	0.954023	0.942029	0.571429	0.862069	0.878049	0.803922	0.842105	0.878049	0.944444	0.75
chr19.1470788	2.83064	0.013738	-	utr3	Cpg_island	APC2	NM_005883	10297	0	0	0	0	0	NA	0	0	0	0	0	0	0	0	0	0.0192308	0.214286	0.0555556	0.0588235	0.0208333
chr19.1472990	-11.7816	0.0238986	-	utr3	Cpg_island	APC2	NM_005883	10297	NA	0	NA	NA	0	0.333333	0	0	0.0769231	0.2	0.29771	0	0	0	NA	0	0	0	0	0
chr1.1476634	9.1067	0.0312943	+	promoter	Cpg_island	C1orf70	NM_001114748	339453	0	0.142857	0	NA	0	0	0	0.05	0	0	NA	0.6	0.0909091	0.0909091	0	0	0.125	0.142857	0	0.230769
chr17.1478388	10.5198	0.00172564	-	utr3	North_shore	SLC43A2	NM_152346	124935	0	0	0	0	0	0	0	0	0	0	0	0.32	0.0555556	0.117647	0	0.0357143	0.1875	0.181818	0	0.0555556
chr17.1478666	11.9324	0.0212216	+	utr3	Cpg_island	SSU72	NM_014188	29101	0.785714	0.833333	0.736842	NA	0.8	0.545455	0.909091	1	1	0.857143	0.769231	0.977273	0.923077	0.833333	1	0.736842	1	0.833333	1	0.966667
chr17.1478694	9.25374	0.021516	+	utr3	Cpg_island	SLC43A2	NM_152346	124935	0.642857	0.875	0.736842	1	0.710145	0.909091	1	1	0.956522	1	0.894737	1	0.916667	1	1	1	0.942857	1	1	0.965517
chr17.1478735	22.2913	0.00959168	-	utr3	Cpg_island	SLC43A2	NM_152346	124935	0.2	0.714286	0.333333	1	0.657895	0.478261	0.636364	0.692308	0.754098	0.916667	0.717277	1	1	0.821429	0.733333	0.888889	0.846154	0.75	0.617021	1
chr11.1483891	-10.0359	0.038038	+	utr3	Cpg_island	-	-	-	0.638889	0.625	0.823529	1	0.773585	0.4	0.83871	0.697674	0.72973	0.775	0.829268	0.626087	0.772727	0.46875	0.734375	0.722222	0.672414	0.655172	0.741935	0.533981
chr19.1489379	-6.15235	0.0354277	+	promoter	North_shore	PCSK4	NM_017573	54760	1	1	1	1	1	1	NA	1	1	1	1	1	1	1	1	0.925926	1	1	0.857143	0.555556
chr19.1489831	26.3725	0.0305973	+	promoter	North_shore	PCSK4	NM_017573	54760	0.514286	0.6	0.571429	0	0.5	0.272727	0	0.210526	0.272727	0.3	0.45283	1	0.347826	0.44	0.869565	0.2	0.666667	NA	0.647059	0.571429
chr19.1489854	28.4578	0.0388355	+	promoter	North_shore	REEP6	NM_138393	92840	0.742857	0.166667	0.142857	1	0.4	0.181818	0	0	0.272727	0.1	0.433962	1	0.521739	0.48	0.608696	0.6	0.5	NA	0.647059	0.571429
chr19.1489919	25.3082	0.00400991	-	promoter	North_shore	LPCAT1	NM_024830	79888	0.0588235	0	0.0769231	0	0.193548	NA	NA	0.121212	0.5	0.125	0	0.490196	0.181818	0.222222	0.714286	0.2	0.1	NA	0.333333	0.461538
chr19.1489924	12.6349	0.0489043	-	promoter	North_shore	REEP6	NM_138393	92840	0	0	0.0769231	0	0.0645161	NA	NA	0.121212	0	0.125	0	0.117647	0	0.222222	0.428571	0.6	0.1	NA	0	0.0769231
chr19.1490228	-1.50532	0.0400963	+	promoter	Cpg_island	PCSK4	NM_017573	54760	0	0.0769231	0	0	0.017094	0	0	0	0.037037	0	0	0	0	0	0	0	0	0	0	0
chr19.1491194	2.34246	0.0323439	+	promoter	Cpg_island	PCSK4	NM_017573	54760	0	0	0	0	0	0	0	0	0	0	0	0.0461538	0	0.107143	0	0	0	0	0.0833333	0
chr19.1491355	2.19303	0.0246637	+	promoter	Cpg_island	PCSK4	NM_017573	54760	0	0	0	0	0	0	0	0	0	0	0	0.0493827	0	0.0769231	0	0	0	0	0	0.0724638
chr19.1491496	10.4676	0.035613	-	promoter	Cpg_island	REEP6	NM_138393	92840	0	0.0588235	0.153846	0	0.0555556	0.111111	NA	0	0	0.166667	0.105263	0.380952	0.142857	0.444444	0	0.25	0	0	0.176471	0.0925926
chr19.1491547	11.2231	0.0315439	+	promoter	Cpg_island	REEP6	NM_138393	92840	0.0909091	0.0909091	0	0	0	0	NA	0	0.307692	0.133333	0	0	0.25	0.142857	0.222222	0.2	0.0769231	0	0.3125	0.0833333
chr19.1491566	2.83041	0.0194257	+	promoter	Cpg_island	PCSK4	NM_017573	54760	0	0	0.0416667	0	0	0	NA	0	0	0	0	0	0	0	0	0.0754717	0.0357143	0.0909091	0.0277778	0.08
chr19.1491709	17.5279	0.00793566	-	promoter	Cpg_island	REEP6	NM_138393	92840	0.157895	0.0952381	0.0526316	0	0.328125	0.25	0	0.0909091	0	0.25	0.269939	0.330769	0.413793	0.333333	0.196429	0.461538	0.184211	0.321429	0.173913	0.263889
chr16.1494832	-7.33201	0.0437917	-	promoter	North_shore	CCDC154	NM_001143980	645811	1	1	1	1	1	1	1	1	0.875	0.909091	1	0.766667	0.931034	0.787234	1	1	0.833333	0.904762	1	1
chr16.1495016	-18.719	0.00163664	-	promoter	North_shore	CLCN7	NM_001287;NM_001114331	1186	1	0.809524	0.789474	1	0.921053	0.75	1	1	0.8	0.866667	0.904762	0.650794	0.707317	0.84	0.758065	0.454545	0.6	0.894737	0.741935	0.875
chr16.1496079	10.5217	0.00245559	+	promoter	North_shore	CCDC154	NM_001143980	645811	0.0625	0.03125	0.097561	0	0.133333	0.0769231	0	NA	0.0555556	0.0789474	0.00930233	0.147887	0.388889	0.0952381	0.157895	0.107143	0.128205	0.375	0	0.113636
chr16.1496303	-23.499	0.00430039	+	promoter	North_shore	CCDC154	NM_001143980	645811	0.882353	0.833333	0.611111	1	0.529412	NA	NA	0.95	0.555556	0.615385	0.794872	0.615385	0.125	0.5	0.4375	0.538462	0.5	0.571429	0.4	0.684211
chr16.1496330	-4.14931	0.0450782	+	promoter	North_shore	CCDC154	NM_001143980	645811	1	1	1	1	1	1	NA	1	0.8	1	1	0.972222	NA	1	1	0.928571	1	0.888889	1	0.933333
chr19.1497653	18.8826	0.0318995	-	utr3	South_shore	REEP6	NM_138393	92840	0	0.342857	0.6	0	0.402439	0.357143	0.307692	0.142857	0.288889	0.4	0.361991	0.520548	0.295082	0.6	0.306452	0.3125	0.571429	0.595745	0.35	0.518987
chr19.1497818	-11.7985	0.0275691	+	utr3	South_shore	REEP6	NM_138393	92840	0.394737	0.454545	0.333333	0.462687	0.4	NA	NA	0.333333	0.307692	0.352941	0.5	0.12766	0.428571	0.35	0.1875	0.2	0.533333	0.375	0.25	0.363636
chr19.1505868	20.9645	0.0181082	+	utr3	North_shore	ADAMTSL5	NM_213604	339366	0.0833333	0.791667	1	0	0.882353	0.833333	NA	0.882353	0.916667	0.9375	0.9	1	0.84375	1	1	1	1	1	0.888889	0.8125
chr17.1508430	25.0936	0.020323	-	promoter	North_shore	SLC43A2	NM_152346	124935	0.361702	0.342105	0.363636	0.12963	0.333333	0.285714	0	NA	0.166667	0.555556	0.650794	NA	0.315789	0.5	0.446809	0.848485	0.833333	0.25	0.833333	0.6875
chr17.1508720	-23.7466	0.0248058	-	promoter	North_shore	SLC43A2	NM_152346	124935	1	0.318182	NA	NA	0.52381	0.25	0.9	0.416667	0.294118	0.388889	0.72549	0.311111	0.153846	0.230769	0.186441	0.448276	0.6	0.285714	0.478261	0
chr11.1509741	8.32418	0.0487263	+	promoter	intercpg	MOB2	NM_001172223;NM_053005	81532	0.909091	0.888889	0.857143	1	0.907407	0.944444	1	0.823529	0.578947	0.848485	0.960784	1	0.933333	1	1	1	0.791667	1	0.785714	1
chr17.1509911	-5.47691	0.0232431	+	promoter	Cpg_island	SLC43A2	NM_152346	124935	1	1	1	NA	1	NA	1	NA	1	1	1	1	1	1	1	1	NA	0.833333	0.909091	0.823529
chr17.1509945	18.7136	0.0299956	+	promoter	Cpg_island	SLC43A2	NM_152346	124935	0.5	0.705882	0.894737	0.25	0.705882	0.555556	0	0.222222	0.75	0.666667	0.526316	0.843137	0.666667	0.52381	0.941176	0.6875	0.8	0.866667	0.75	0.666667
chr7.1510165	9.41864	0.0267019	+	utr3	North_shelf	INTS1	NM_001080453	26173	0	0	0.210526	0	0	0	0	0	0	0	0	0.52	0.0263158	0.04	0	0	0	0.0625	0.117647	0.0625
chr5.1512400	-34.7036	0.0334532	+	promoter	intercpg	LPCAT1	NM_024830	79888	0	0.555556	NA	1	1	0.555556	0.689655	1	0.833333	0.588235	0.529412	0.135135	0.571429	0.181818	NA	0	0	0.555556	0.5	0.5
chr19.1513375	0.48473	0.02836	+	promoter	Cpg_island	ADAMTSL5	NM_213604	339366	0	0	0	0	0	0	0	0	0	0	0	0.0120482	0	0	0	0	0.0169492	0	0	0
chr19.1513643	1.68538	0.0216224	-	promoter	Cpg_island	ADAMTSL5	NM_213604	339366	0	0	0	0	0	0	0	0	0	0	0	0	0.0344828	0	0	0.0384615	0.1	0	0	0
chr19.1513775	4.7844	0.0306298	+	promoter	Cpg_island	ADAMTSL5	NM_213604	339366	0	0	0	0	0	0	0	0	0	0	0	0	0.111111	0	0	0.123077	0.171429	0	0	0
chr5.1524282	2.51183	0.0426182	+	promoter	Cpg_island	LPCAT1	NM_024830	79888	NA	0	NA	0	0	0	0	0	0	0	0	0.105263	0	0	0	0	0	0	0	0.0588235
chr5.1524965	-11.1332	0.0394807	+	promoter	South_shore	LPCAT1	NM_024830	79888	0.864865	0.96	0.928571	NA	0.818182	0.846154	1	1	0.846154	0.928571	0.886598	0.87931	1	0.8125	0.487805	0.944444	0.736842	0.705882	0.764706	0.678571
chr1.1533444	-19.7359	0.0258319	+	utr3	North_shore	-	-	-	0.761905	0.647059	NA	0.583333	0.794118	0.454545	1	NA	0.833333	0.571429	0.633333	0.230769	0.8	0.625	0.612903	0.333333	0.571429	0.5	0.375	0.589744
chr1.1533447	21.0172	0.0305266	+	utr3	North_shore	-	-	-	0.650794	0.470588	NA	0.583333	0.705882	0.545455	0.411765	NA	0.833333	0.714286	0.233333	0.435897	1	1	0.870968	0.866667	0.714286	0.5	0.833333	0.74359
chr1.1533725	-25.4656	0.00108008	-	utr3	North_shore	-	-	-	1	0.870968	1	1	1	0.714286	NA	1	0.8	0.888889	1	0.837209	0.52381	0.916667	0.642857	0.857143	0.4	0.666667	0.75	0.4
chr1.1533743	16.5183	0.0138155	+	utr3	North_shore	-	-	-	0.214286	0.6	0.529412	0	0.6	0.461538	0.166667	0.542857	0.424242	0.405405	0.451327	0.475	0.694118	0.580645	0.6875	0.444444	0.608696	0.642857	0.4375	0.766667
chr1.1535747	-4.93789	0.0444095	+	promoter	Cpg_island	-	-	-	0	0	0	NA	0	0.125	0	0	0.166667	0	0.130841	0	0	0	0	0	0	0	0	0
chr1.1535788	3.26767	0.00913405	-	promoter	Cpg_island	-	-	-	0	0	0	0	0	0	0	0	0	0	0	0.0277778	0	0	0.0666667	0	0.111111	0	0	0
chr1.1535824	-2.33495	0.0374417	+	promoter	Cpg_island	-	-	-	0	0	0.0555556	NA	0.0985915	0	0	0	0	0.0555556	0	0	0	0	0	0	0	0	0	0
chr1.1535893	-3.31057	0.0120153	+	promoter	Cpg_island	-	-	-	0	0.0576923	0	NA	0.0704225	0	0	0	0.0344828	0.0833333	0.0534351	0	0.0232558	0	0	0	0.030303	0.0243902	0.0344828	0.0217391
chr1.1535938	3.59161	0.0462089	+	promoter	Cpg_island	-	-	-	0	0	NA	NA	0	0	0	0	0	0	0	0	0.0208333	0	0	0.190476	0.0833333	0	0	0
chr1.1536017	6.93813	0.0137297	-	promoter	Cpg_island	-	-	-	0	0	0	0	0	0	0	0	0.0666667	0.037037	0	0.333333	0	0.130435	0.1	0.0967742	0.0714286	0	0.0625	0
chr17.1538648	-5.64702	0.028882	+	utr3	Cpg_island	SCARF1	NR_028075;NR_028076;NM_145352;NM_003693;NM_145350	8578	1	0.928571	0.956522	1	0.969512	0.923077	0.969231	0.891892	0.97619	0.933333	0.95614	0.933775	0.944444	0.88	1	0.78125	0.824074	0.945946	0.848485	0.870504
chr16.1539887	12.7377	0.0287464	+	promoter	South_shore	TELO2	NM_016111	9894	0.730159	0.809524	0.7	1	0.434783	1	NA	0.851852	0.916667	0.888889	0.794118	0.976744	0.909091	0.928571	1	1	0.75	0.8	0.769231	1
chr16.1542895	13.5149	0.0171333	-	promoter	North_shore	PTX4	NM_001013658	390667	0.979167	0.823529	0.888889	0.909091	0.961538	NA	NA	0.333333	0.583333	0.833333	0.8125	1	0.880952	0.95	1	1	0.956522	0.833333	0.916667	1
chr7.1545386	19.5282	0.0470073	-	promoter	South_shore	INTS1	NM_001080453	26173	0.777778	0.777778	NA	0.261905	0.619048	0.8	1	NA	0.5	0.5	0.690476	0.914894	0.710526	0.818182	NA	1	0.5	0.75	1	0.625
chr19.1555357	10.5656	0.0255775	-	utr3	North_shore	MEX3D	NM_001174118;NM_203304	399664	NA	0.636364	1	NA	0.95	1	1	0.6	0.666667	1	1	1	1	1	1	1	1	1	1	NA
chr19.1555502	-12.9904	0.0410398	+	utr3	North_shore	MEX3D	NM_001174118;NM_203304	399664	0.727273	0.823529	0.833333	NA	0.970588	0.875	1	1	0.866667	0.724138	1	0.833333	1	0.913043	0.714286	0.636364	0.75	NA	0.695652	0.666667
chr16.1560515	22.6065	0.00773497	+	utr3	South_shore	IFT140	NM_014714	9742	0	0.3	0.133333	0	0.115385	0	0.25	0.142857	0	0.0769231	0	0.409091	0.12	0.5	0.821429	0.30303	0.0909091	0.153846	0.181818	0.294118
chr1.1566185	-7.02123	0.0225042	-	promoter	Cpg_island	MMP23B	NM_006983	8510	0	0	0.166667	0	0.115385	0.0666667	0.0555556	0.142857	0.0833333	0.125	0.147541	0.0983607	0	0	0	0	0.08	0	0	0
chr1.1566263	14.358	0.0203615	+	promoter	Cpg_island	MMP23B	NM_006983	8510	0	0.142857	0	NA	0	0.2	NA	0	0	0.125	0	0	0.1	0.230769	0	0.2	0	0.5	0.214286	0.5
chr1.1566267	16.3587	0.0157602	+	promoter	Cpg_island	MMP23B	NM_006983	8510	0	0.125	0	NA	0	0.142857	NA	0	0	0.222222	0	0	0.15	0.153846	0.666667	0	0.142857	0.166667	0.2	0.5
chr1.1566269	24.9589	0.00165808	+	promoter	Cpg_island	MMP23B	NM_006983	8510	0	0	0	NA	0.0625	0.142857	NA	0	0	0.111111	0	0.7	0.157895	0.0769231	0.666667	0.4	0.142857	0.333333	0.0666667	0.4
chr1.1566677	6.19264	0.00905315	-	promoter	Cpg_island	MMP23B	NM_006983	8510	0	0	0	NA	0	0	0	0	0	0	0	0.0714286	0	0	0	0.139535	NA	0	0.105263	0.1
chr1.1566687	-2.822	0.0363994	+	promoter	Cpg_island	MMP23B	NM_006983	8510	0	0	0.0625	0	0	0	0	0.0769231	0	0.0526316	0.084507	0	NA	0	0	0	0	0	0	0
chr1.1566691	-5.0809	0.0471472	+	promoter	Cpg_island	MMP23B	NM_006983	8510	0	0	0	0	0	0.125	0	0.0833333	0.0769231	0	0.230769	0	NA	0	0	0	0	0	0	0
chr1.1566730	-5.99415	0.0348354	+	promoter	Cpg_island	MMP23B	NM_006983	8510	0	0	0	0.181818	0	0	0	0.0833333	0.0769231	0	0.230769	0	NA	0	0	0	0	0	0	0
chr19.1568552	2.05524	0.0358246	+	promoter	Cpg_island	MEX3D	NM_001174118;NM_203304	399664	0	0	0	0	0	NA	0	0	NA	0	0	0	0.0512821	NA	0	0	0	0	0	0.0625
chr19.1568611	8.24831	0.0113083	+	promoter	Cpg_island	MOB2	NM_053005	81532	0	0	0	0	0	NA	0	0	NA	0	0	0.214286	0.0277778	0	0.352941	0	0	0.133333	0	0
chr19.1568612	9.45506	0.00162188	-	promoter	Cpg_island	MOB2	NM_053005	81532	0	0	0	0	0.0181818	0	0	0	0	0.0714286	0	0.210526	0.0222222	0	0.25	0.0769231	0.115385	0.0714286	0	0.163265
chr19.1568632	4.23073	0.0185697	-	promoter	Cpg_island	MEX3D	NM_001174118;NM_203304	399664	0	0	0	0	0.0178571	0	0	0	0	0	0	0.137931	0.0625	0	0	0.153846	0	0	0	0.0612245
chr19.1569016	-17.7445	0.00216598	+	promoter	South_shore	MEX3D	NM_001174118;NM_203304	399664	1	1	1	1	0.904762	0.714286	1	1	1	0.857143	1	0.847826	0.857143	0.909091	0.384615	0.948718	0.888889	0.7	0.857143	0.666667
chr11.1575340	-15.5734	0.0351823	+	utr3	North_shelf	MOB2	NM_053005	81532	1	0.833333	0.909091	1	0.952381	0.777778	1	0.789474	0.6875	0.818182	0.625	0.810811	0.384615	0.875	0.75	0.6	0.818182	0.8	0.666667	0.619048
chr11.1575450	-10.8681	0.0428095	+	utr3	North_shelf	DUSP8	NM_004420	1850	1	0.9	0.888889	1	0.9375	0.888889	1	0.928571	0.909091	1	1	1	0.777778	0.8	1	0.647059	0.666667	1	NA	0.714286
chr19.1577885	-19.9386	0.0332608	-	utr3	Cpg_island	MBD3	NM_003926	53615	0.596154	0.47619	0.578947	1	0.448276	0.25	NA	0.7	0.0952381	0.263158	0.4	0.321429	0.352941	0.214286	0.224138	0.25	0.5625	0.3125	0.142857	0
chr7.1578823	-12.8353	0.0397074	+	utr5	South_Shelf	MAFK	NM_002360	7975	0.103448	0.403846	0.37037	NA	0.444444	0.444444	0.469697	0.26087	0.272727	0.342105	0.493506	0.0333333	0.0851064	0.34	0.174757	0.28	0.414634	0.129032	0.3	0.319149
chr7.1580330	-16.0936	0.00539184	+	utr3	North_shelf	MAFK	NM_002360	7975	1	NA	1	1	NA	1	1	NA	1	1	1	1	0.875	NA	1	0.571429	0.571429	0.875	1	0.9
chr7.1582002	5.34866	0.0026565	-	utr3	North_shelf	MAFK	NM_002360	7975	1	0.944444	1	0.928571	1	0.8	0.875	1	0.923077	0.875	1	1	1	1	1	1	1	1	1	1
chr16.1583749	-23.4421	0.0180042	+	utr5	North_shore	IFT140	NM_014714	9742	1	0.473684	0.769231	NA	0.619048	0.6	1	0.636364	0.363636	0.461538	0.722772	0.6	0.375	0.222222	0.3	0.32	0.444444	NA	0.444444	0.777778
chr16.1583810	-25.2308	0.0313602	+	utr5	Cpg_island	TMEM204	NM_024600	79652	1	0.473684	1	NA	0.45	0.7	1	0.818182	0.272727	0.384615	0.80198	0.666667	0.375	0.333333	0.3	0.4	0.444444	NA	0.555556	0.555556
chr16.1583937	19.8497	0.0248729	-	utr5	Cpg_island	IFT140	NM_014714	9742	NA	0.428571	0.25	1	0.5	0.333333	NA	0.625	0.636364	0.676471	0.449541	0.851852	0.625	1	0.944444	0.492063	0.658537	0.692308	0.771429	0.658537
chr16.1583949	17.3053	0.0327169	-	utr5	Cpg_island	IFT140	NM_014714	9742	NA	0.37037	0.375	1	0.322581	0.5	NA	0.375	0.6	0.666667	0.46729	0.754717	0.625	0.625	0.944444	0.5	0.7	0.6	0.741935	0.564103
chr16.1583951	19.2339	0.00883467	-	utr5	Cpg_island	IFT140	NM_014714	9742	NA	0.357143	0.444444	1	0.4375	0.5	NA	0.625	0.363636	0.611111	0.440678	0.703704	0.625	1	0.833333	0.4375	0.714286	0.615385	0.777778	0.695652
chr16.1584221	22.7786	0.0307105	+	utr5	Cpg_island	TMEM204	NM_024600	79652	0	0.461538	0.47619	0	0.740741	0	0.5	0.681818	0.615385	0.7	0.631579	0.763636	0.568182	0.75	0.769231	0.37931	0.777778	0.692308	0.818182	0.857143
chr16.1584228	20.3917	0.0157169	-	utr5	Cpg_island	TMEM204	NM_024600	79652	0.37931	0.75	0.0769231	NA	0.592593	0.571429	NA	0.28	0.3	0.7	0.634921	0.672414	0.543478	0.777778	NA	0.733333	0.65	0.777778	0.684211	0.84
chr7.1584229	13.7127	0.0125455	+	utr3	Cpg_island	TMEM184A	NM_001097620	202915	0.1	0.107143	0.0714286	0	0.232143	0.0769231	0.170732	0.217391	0.235294	0.454545	0.126437	0.352941	0.230769	0.2	0.55814	0.338983	0.275862	0.227273	0.3	0.151515
chr7.1585124	9.33437	0.0240547	-	utr3	South_shore	TMEM184A	NM_001097620	202915	1	0.894737	0.9	NA	1	NA	0.545455	0.939394	0.9375	0.9	0.904762	1	0.913043	0.870968	1	1	1	1	1	1
chr11.1595013	-22.6951	0.0310217	+	promoter	North_shore	DUSP8	NM_004420	1850	0.416667	0.333333	0.75	1	0.333333	NA	NA	0.65	0.615385	0.533333	0.543478	0.243243	0.5	0.25	0.307692	0.0833333	0.375	0.307692	0.230769	0.703704
chr5.1595015	-17.5213	0.0153062	+	promoter	Cpg_island	SDHAP3	NR_003263	728609	0.363636	0.357143	0.142857	0.451613	0.101449	0.3125	1	0.2	0.1875	0.133333	0.33871	0.0506329	0.1875	0.105263	0.375	0.0181818	0.0645161	0.206897	0.139535	0.149254
chr5.1595027	-7.45726	0.0448744	-	promoter	Cpg_island	MOB2	NM_053005	81532	0.0666667	0	0	0.380952	0.232143	0	NA	0	0	0.111111	0.148936	0	0.0909091	0	0	0.028169	0	0	0	0
chr1.1601116	6.21188	0.00364743	+	utr5	Cpg_island	SLC35E2B	NM_001110781	728661	0	0	0	0	0	0	0	0	0	0	0	0.0769231	0	0	0.177778	0.0322581	0.05	0	0.181818	0
chr12.1604651	45.4751	0.0239827	-	utr3	intercpg	ERC1	NM_178040;NR_027948;NM_178039;NR_027946;NR_027949	23085	NA	0	1	NA	0.263158	0.416667	NA	0.538462	0	0	0	NA	0.242424	0.923077	1	1	0	1	0.947368	0.578947
chr19.1606647	14.7174	0.0233435	+	promoter	South_shore	UQCR11	NM_006830	10975	0	0.315789	0	NA	0.166667	0.363636	0	0.162791	0.125	0.214286	0.118421	0.197802	0.225806	0.15625	0.529412	0.0819672	0.272727	0.25641	0.323529	0.285714
chr19.1607175	-24.4649	0.0271392	-	promoter	South_shore	UQCR11	NM_006830	10975	1	0.8	0.714286	NA	0.921053	NA	NA	1	0.333333	0.928571	1	0.654545	0.806452	0.9	0.307692	0.0769231	0.8	0.866667	0.636364	0.692308
chr7.1609184	5.17997	0.0373903	-	utr5	North_shore	KIAA1908	NR_027328;NR_021487;NR_027329	114796	NA	0.0526316	0	NA	0	NA	0	0	0	0	0.0666667	0	0.0625	0.142857	0.0357143	0.0769231	0	0.133333	0.105263	0
chr6.1609266	-5.20758	0.0376723	+	promoter	Cpg_island	FOXC1	NM_001453	2296	0	0	0	0	0.0784314	0	0.157895	0	0	NA	0.121622	0	0	0	0	0	0	0	0	0
chr6.1610500	5.8749	0.0224186	-	promoter	Cpg_island	FOXC1	NM_001453	2296	0	0	0	0	0	0	0	0	0	0	0	0.142857	0	0.333333	0	0	0	0	0.0769231	0
chr7.1611361	-14.743	0.00990434	+	promoter	South_shore	PSMG3	NM_001134340;NM_032302	84262	1	0.84	0.909091	0.933333	1	0.933333	NA	1	0.84	0.857143	0.879518	0.918367	0.833333	0.777778	0.717391	0.580645	0.583333	0.8	0.619048	1
chr17.1613545	4.3901	0.0321609	-	utr5	Cpg_island	SLC35E2B	NM_001110781	728661	0	0	0	0	0	0	NA	0	0	0	0	0	0	0	0	0	0	0.125	0.0408163	0.222222
chr17.1619051	1.88921	0.029796	+	promoter	North_shore	C17orf91	NR_028503;NR_028505;NR_028504;NR_028502	84981	0	0	0	0	0	0	0	0	0	0	0	0.015873	0	0	0	0.0571429	0	0	0.0882353	0
chr17.1627558	10.0722	0.0382029	+	promoter	North_shore	WDR81	NM_001163809;NM_152348;NM_001163811;NM_001163673	124997	0	0.08	0	0	0.206897	0.111111	0.2	0.173913	0.025641	0	0.134615	0.119205	0	0.153846	0.125	0.352941	0.0909091	0.15	0.333333	0.28125
chr17.1627607	-24.481	0.0372531	-	promoter	North_shore	WDR81	NM_001163809;NM_152348;NM_001163811;NM_001163673	124997	0.8	0.533333	0.5	NA	0.222222	NA	NA	0.75	0.181818	0.5	0.6	0	0.542373	0.05	0	0.25	0.388889	0.307692	0.461538	0.428571
chr17.1627614	18.3331	0.0242382	+	promoter	North_shore	WDR81	NM_001163809;NM_152348;NM_001163811;NM_001163673	124997	0	0.0833333	0.411765	0	0.0714286	NA	0	0.333333	0	0.125	NA	0.478261	0.4	0	0.192308	0.277778	NA	0.2	0.125	0.222222
chr17.1629859	6.77664	0.0242097	-	utr5	Cpg_island	WDR81	NM_001163809;NM_152348;NM_001163811;NM_001163673	124997	1	0.888889	1	0.645833	0.9	0.923077	NA	0.909091	0.833333	0.972222	0.932692	1	0.945205	1	1	1	1	0.948718	0.957447	0.96875
chr17.1631781	-25.4549	0.0114993	+	utr5	South_shore	WDR81	NM_001163809;NM_152348;NM_001163811;NM_001163673	124997	0.293103	0.642857	0.444444	0.404762	0.454545	0.538462	1	0.5	0.529412	0.434783	0.428571	0.285714	0.206897	0.0625	0.241379	0	0.333333	0	0.8	0.545455
chr5.1634547	-21.1193	0.00148328	+	promoter	South_shore	LOC728613	NR_003713	728613	0.470588	0.117647	0.4	0	0.22	0.181818	0	0.229508	0.4	0.4375	0.306667	0	0	0.333333	0	0	0	0.05	0.166667	0.119048
chr5.1634798	-15.9599	0.004343	+	promoter	South_shore	LOC728613	NR_003713	728613	0.257426	0.294118	0.468085	0.65625	0.619048	0.514286	0.567568	0.529412	0.727273	0.5	0.479452	0.302752	0.333333	0.3	0.305556	0.22	0.369565	0.473684	0.324324	0.432432
chr1.1635711	-14.3032	0.00592753	+	utr5	South_shore	CDK11A	NM_033529;NM_024011	728642	1	1	1	1	1	0.8	1	0.818182	1	0.9	1	0.78125	0.842105	1	0.59375	0.869565	1	0.909091	NA	0.909091
chr4.1641976	-14.9188	0.00223615	-	utr3	North_shelf	FAM53A	NM_001174070;NM_001013622	152877	1	1	1	NA	1	NA	1	1	NA	0.875	0.925926	0.703704	0.894737	0.666667	0.923077	0.818182	NA	0.818182	0.909091	1
chr4.1642109	16.3343	0.0213128	-	utr3	North_shelf	FAM53A	NM_001174070;NM_001013622	152877	0.967742	0.6	1	NA	0.5	NA	1	0.807692	NA	0.75	0.740741	1	0.894737	1	1	1	NA	0.727273	1	1
chr4.1643032	-13.021	0.00991652	-	utr3	North_shelf	FAM53A	NM_001174070;NM_001013622	152877	NA	1	0.833333	1	NA	1	NA	1	1	0.933333	1	0.779412	0.892857	0.75	1	NA	1	0.923077	0.866667	0.666667
chr11.1644608	-9.28228	0.013028	-	promoter	intercpg	KRTAP5-4	NM_001012709	387267	1	0.8	1	1	1	NA	1	1	NA	1	0.939394	0.939394	0.921053	0.842105	0.666667	1	0.833333	0.8	0.882353	1
chr11.1644664	-16.889	0.0368627	-	promoter	intercpg	KRTAP5-4	NM_001012709	387267	1	0.625	0.8	1	0.8	NA	1	1	0.833333	0.846154	0.918919	0.852941	0.674419	0.8	1	0.45	0.833333	0.571429	0.888889	0.222222
chr1.1647867	14.9981	0.00577551	-	utr5	intercpg	CDK11B	NM_033489;NM_033486;NM_033487;NM_033492;NM_033488;NM_033493	984	0.645833	0.571429	0.833333	1	0.772727	0.75	NA	0.7	NA	0.952381	0.888889	0.976471	0.894737	1	0.985714	1	1	0.727273	0.777778	0.857143
chr8.1649635	-1.99568	0.0340497	-	utr3	Cpg_island	DLGAP2	NM_004745	9228	0.0232558	0.0285714	0.0714286	0	0	0	0.0789474	0	0	0.025	0.0336134	0.0108696	0	0.0434783	0	0	0	0	0	0
chr8.1649681	-3.23033	0.00253972	-	utr3	Cpg_island	DLGAP2	NM_004745	9228	0.0232558	0.0571429	0.0714286	0	0.0491803	0	0	0	0.0625	0.0512821	0.0420168	0.0108696	0	0	0	0	0	0	0	0
chr19.1650880	19.1664	0.0424644	-	promoter	intercpg	TCF3	NM_001136139;NM_003200	6929	0.714286	0.483871	0.227273	0	0.586207	0.7	0.125	0.2	0.4	0.52381	0.428571	0.8	0.5	0.5	0.434783	0.5	0.733333	0.4375	0.545455	0.75
chr19.1651307	2.87632	0.0345646	+	promoter	intercpg	TCF3	NM_001136139;NM_003200	6929	0	0	0	0	0	0	0	0	0	0	0	0	0	0.133333	0.119048	0.0208333	0	0	0	0
chrX.1657276	-8.47125	0.0114927	+	promoter	South_shore	P2RY8	NM_178129	286530	1	1	1	NA	1	1	1	1	1	0.870968	1	1	0.888889	0.894737	0.964912	0.792453	0.9	0.833333	0.952381	1
chr16.1662824	0.820251	0.0352864	+	promoter	Cpg_island	CRAMP1L	NM_020825	57585	0	0	0	0	0	0	0	0	0	0	0	0.0240964	0	0	0	0	0	0	0	0.027027
chr4.1686305	1.28741	0.0431582	-	promoter	Cpg_island	FAM53A	NM_001174070;NM_001013622	152877	0	0	0	0	0	0	0	0	0	0	0	0	0.015625	0	0	0.0555556	0	0	0	0
chr4.1686339	3.52874	0.0155947	+	promoter	Cpg_island	FAM53A	NM_001174070;NM_001013622	152877	0	0	0	0	0	0.0416667	0	0	0	0	0	0.102273	0.025974	0	0.0666667	0	0	0.027027	0.0833333	0.0588235
chr4.1686376	2.13399	0.0409043	-	promoter	Cpg_island	FAM53A	NM_001174070;NM_001013622	152877	0	0.0333333	0	0	0	0	0	0	0	0	0	0	0.0298507	0.0952381	0	0	0	0	0.0666667	0
chr4.1687321	17.2179	0.00409704	+	promoter	South_shore	FAM53A	NM_001174070;NM_001013622	152877	0.253165	0.16129	0	0	0.0701754	0.35	0	0.194444	0.153846	0.15	0.037037	0.490909	0.242857	0.388889	0.153846	0.195652	0.482759	0.151515	0.25	0.280702
chr1.1690614	19.9683	0.0128393	-	promoter	North_shore	NADK	NM_001198993;NM_023018;NM_001198995;NM_001198994	65220	NA	0.428571	NA	0.214286	0.428571	0.142857	0.0588235	NA	0.285714	0.294118	0.175439	0.777778	0.375	0.6	0.1	0.8	0.230769	0.333333	0.5	NA
chr1.1691442	-18.3811	0.0417365	+	promoter	North_shore	-	-	-	0.666667	0.666667	0.608696	0	0.609756	0.666667	1	0.2	0.684211	0.777778	0.649123	0.6	0.285714	0.333333	0.666667	0.25	0.411765	0.307692	0.8	0.44
chr1.1691555	19.237	0.00207466	+	promoter	North_shore	NADK	NM_001198993;NM_023018;NM_001198995;NM_001198994	65220	0.272727	0.480769	0.394737	0.38	0.469697	0.193548	0.15625	0.606061	0.388889	0.506667	0.35	0.72956	0.539326	0.45283	0.697368	0.684211	0.5	0.408163	0.544118	0.521127
chr1.1691696	-5.8201	0.039579	+	promoter	North_shore	NADK	NM_001198993;NM_023018;NM_001198995;NM_001198994	65220	0.2	0.0357143	0.15	0.0952381	0.027027	0.181818	0	0.166667	0	0	0	0.102564	0	0	0	0	0	0	0	0.025641
chr12.1703592	1.62124	0.0280597	-	promoter	Cpg_island	FBXL14	NM_152441	144699	0	0	0	0	0	0	0	0	0	0	0	0.025641	0.1	0	0	0.0277778	0	0	0	0
chr1.1709999	1.69468	0.040187	+	promoter	Cpg_island	NADK	NM_001198993;NM_023018;NM_001198994	65220	0	0	0	0	0	0	0	0	0	0	0	0.03125	0.030303	0	0	0	0	0	0	0
chr1.1710019	2.36655	0.018999	+	promoter	Cpg_island	NADK	NM_001198993;NM_023018;NM_001198994	65220	0	0	0	0	0	0	0	0	0	0	0	0.031746	0	0.111111	0	0	0	0	0.0588235	0
chrX.1710629	0.807787	0.0461994	+	utr5	Cpg_island	ASMT	NM_004043	438	0	0	0	0	0	0	0	0	0	0	0	0.0232558	0	0	0	0.0333333	0	0	0	0
chrX.1718167	-7.15424	0.0489757	+	utr5	Cpg_island	ASMT	NM_004043	438	1	0.952381	0.866667	1	0.837209	0.9	NA	1	0.964286	0.894737	0.946667	0.883117	0.85	0.962963	0.75	0.795455	1	0.714286	0.914286	0.909091
chrX.1719782	-6.36538	0.0417713	+	utr5	Cpg_island	ASMT	NM_004043	438	NA	1	1	NA	1	1	NA	1	1	0.918919	1	1	0.954545	0.829787	1	1	0.957447	0.642857	1	0.862069
chrX.1720492	-9.06126	0.0146057	-	utr5	Cpg_island	ASMT	NM_004043	438	1	0.977273	1	0.884615	0.962963	0.909091	1	1	1	0.923077	1	1	0.904762	0.875	0.777778	0.781818	0.933333	0.75	0.806452	0.939394
chrX.1720538	-9.56721	0.0453053	+	utr5	Cpg_island	AKAP17A	NM_005088;NR_027383	8227	NA	1	1	1	1	1	1	1	1	0.894737	1	1	0.875	1	1	0.642857	0.666667	0.714286	1	1
chrX.1720606	-10.7673	0.0115446	+	utr5	Cpg_island	ASMT	NM_004043	438	NA	1	1	1	1	1	1	0.909091	1	1	1	1	0.875	0.75	1	0.642857	1	1	0.857143	0.875
chrX.1720626	23.5355	0.00536003	+	utr5	Cpg_island	AKAP17A	NM_005088;NR_027383	8227	0.173913	0.153846	0.2	0	0.0833333	0.3	0	0.405405	0.285714	0.173913	0.107143	0.6	0.272727	0.111111	0.692308	0.641026	0.142857	0.111111	0.363636	0.466667
chr8.1732019	-8.05105	0.0295664	-	utr3	North_shore	CLN8	NM_018941	2055	1	0.85	1	1	0.954545	1	1	1	1	1	1	0.919355	0.931034	0.842105	1	0.745455	1	0.869565	0.8125	1
chr2.1748929	4.56867	0.0240378	-	promoter	Cpg_island	PXDN	NM_012293	7837	0	NA	0	NA	0	NA	0	0	0	0	0	0.0357143	0.142857	0.0833333	0	0	0	0	0	0.25
chr2.1749973	6.95872	0.00756299	-	promoter	South_shore	PXDN	NM_012293	7837	0.842105	0.873563	0.666667	1	0.954545	0.947368	1	0.963636	0.86	0.946809	0.875	1	1	0.933333	1	1	0.923077	0.982143	0.909091	1
chr2.1750020	7.78974	0.00962072	+	promoter	South_shore	PXDN	NM_012293	7837	1	0.857143	0.9375	1	1	NA	1	0.444444	1	0.933333	0.904762	1	1	1	1	1	1	1	1	1
chr19.1753316	5.18544	0.0323498	+	promoter	Cpg_island	ONECUT3	NM_001080488	390874	NA	0	0	0	0	0	0	0	0	0	0	0	0.0555556	0	0	0.357143	0	0	0.0714286	0
chr8.1765388	-10.1324	0.0212481	-	promoter	South_shore	MIR596	NR_030326	693181	0	0.133333	0.5	NA	0.16	NA	NA	0.225806	0.2	0.222222	0.0434783	0.0612245	0.0294118	NA	0	0	0	0.166667	0.0625	0
chr12.1770791	2.75434	0.0169299	-	promoter	Cpg_island	MIR3649	NR_037422	100500816	0	0	0	0	0	0.0384615	0	0.030303	0	0	0	0.0612245	0	0	0	0.0681818	0.0740741	0	0	0.0606061
chr12.1770854	8.07144	0.00393909	+	promoter	Cpg_island	MIR3649	NR_037422	100500816	NA	0	0	0	0	0	0	0	0	0	0	0	0.0681818	0.0526316	0.2	0	0.272727	0	0.0625	NA
chr12.1770871	4.36026	0.0371289	+	promoter	Cpg_island	MIR3649	NR_037422	100500816	NA	0	0	0	0	0	0	0	0	0	0	0	0.0227273	0	0.2	0	0.0909091	0	0	NA
chr12.1771458	2.06008	0.0387611	-	promoter	Cpg_island	MIR3649	NR_037422	100500816	0	0	0	0	0	0	0	NA	0	0	0	0.025	0	0	0	0	0	0	0	0.0888889
chr11.1772200	-18.9666	0.00706251	+	promoter	South_shore	LOC402778	NM_001170820	402778	0.407407	0.157895	0.142857	0.764706	0.188679	0.25	0.266667	0.509804	0.130435	0.176471	0.434211	0	0.0967742	0.333333	0.155556	0	0.128205	0.16	0.107143	0.157895
chr11.1773338	15.3497	0.0397376	+	promoter	North_shore	MOB2	NM_053005	81532	NA	0.166667	0.222222	0.0204082	0.05	0.166667	0	0.1	0	0.142857	0.111111	0.212766	0.333333	NA	0	0.5	0.666667	0	0.1	0.6
chr11.1773806	-19.5426	0.044027	-	promoter	North_shore	LOC402778	NM_001170820	402778	0.868421	0.5	0.8	0.482759	0.576923	0.538462	0.636364	0.1	0.366667	0.727273	0.794521	0.45283	0.536585	0.409091	0.0769231	0.327869	0.15	0.305556	0.705882	0.333333
chr11.1774335	-15.129	0.0213147	+	utr3	North_shore	LOC402778	NM_001170820	402778	0.184211	0.234043	0.4375	0.842105	0.25	0.45	0.619048	0.294118	0.157895	0.257143	0.384615	0.294118	0.05	0.0952381	0.275362	0.275362	0.139535	0.133333	0.12766	0.322581
chr11.1774378	-11.9562	0.00135788	+	utr3	North_shore	MOB2	NM_053005	81532	1	0.9375	0.9375	1	1	1	1	1	1	1	0.991935	1	1	NA	0.791667	0.849057	0.857143	0.909091	0.722222	0.764706
chr7.1783324	-5.42479	0.034952	+	promoter	North_shore	ELFN1	NM_001128636	392617	1	1	1	1	1	1	NA	1	1	1	NA	0.826087	NA	1	1	1	1	0.846154	1	0.941176
chr7.1783405	-30.1785	0.0119166	-	promoter	North_shore	ARHGEF10	NM_014629	9639	1	NA	0.428571	1	0.6	0.625	0.710526	0.928571	0.7	0.555556	0.344828	0.238095	0.545455	0.5	0.538462	0.166667	NA	0.222222	0.714286	0.391304
chr7.1783567	14.7052	0.0301052	+	promoter	North_shore	ELFN1	NM_001128636	392617	NA	0.846154	0.777778	NA	1	0.818182	NA	0.904762	0.894737	0.9	0.555556	1	1	1	1	1	0.833333	NA	0.4	1
chr4.1795057	6.72877	0.0197873	+	utr5	Cpg_island	FGFR3	NM_000142;NM_001163213;NM_022965	2261	0	0	0	0	0	0	0	0	0	0	0	0.217391	0	0	0	0	0	0	0.0909091	0.2
chr4.1795060	8.51384	0.0319161	-	utr5	Cpg_island	FGFR3	NM_000142;NM_001163213;NM_022965	2261	0	0	0	NA	0	0	NA	0	0	0	0	0.666667	0.117647	0	0	0	0	0	0.1	NA
chr5.1800523	-11.6205	0.0244534	+	promoter	Cpg_island	MRPL36	NM_032479	64979	NA	0.0952381	0	NA	0.111111	0	0.526316	0.2	0.0625	0	0.265625	0	0	0	0	0	0.0869565	0	0.133333	0.037037
chr5.1800531	-18.4185	0.000894456	+	promoter	Cpg_island	NDUFS6	NM_004553	4726	NA	0.285714	0.375	NA	0.388889	0.142857	0.526316	0	0.25	0.4	0.453125	0.184211	0.291667	0	0.214286	0.185185	0.173913	0.166667	0.133333	0.185185
chr5.1800541	-18.1256	0.0326113	-	promoter	Cpg_island	NDUFS6	NM_004553	4726	0.347222	0.515152	0.615385	0.433333	0.232143	0.263158	0.966667	0.575758	0.538462	0.30303	0.327485	0.5	0.285714	0.105263	0.148936	0.457143	0.25	0.176471	0.387097	0.173913
chr5.1800561	-18.6865	0.00734581	+	promoter	Cpg_island	MRPL36	NM_032479	64979	NA	0.5	0.375	NA	0.722222	0.285714	0.526316	0.2	0.375	0.357143	0.375	0.473684	0.166667	0.444444	0.214286	0.222222	0.173913	0.176471	0.133333	0.185185
chr4.1813278	6.8347	0.0207883	-	utr3	intercpg	LETM1	NM_012318	3954	1	0.571429	0.9375	1	1	NA	1	1	0.833333	0.904762	NA	1	1	NA	1	1	1	1	1	1
chr4.1813518	5.9283	0.0495473	-	utr3	intercpg	LETM1	NM_012318	3954	1	1	NA	NA	0.769231	0.75	NA	1	1	0.9375	1	1	0.969697	0.928571	1	1	NA	1	0.888889	1
chr19.1815326	-12.3108	0.0123517	+	utr3	North_shore	REXO1	NM_020695	57455	0.857143	0.945946	0.692308	1	1	1	1	0.8	0.956522	0.722222	1	0.876923	0.888889	0.666667	0.65	0.85	0.903226	0.933333	0.875	0.880952
chr19.1815425	9.75768	0.00559907	+	utr3	North_shore	ATP8B3	NM_001178002;NM_138813	148229	0.823529	1	1	1	1	0.571429	NA	0.875	1	0.941176	0.822222	1	1	1	NA	1	1	1	1	1
chr19.1816027	-8.75275	0.0416261	+	utr3	Cpg_island	REXO1	NM_020695	57455	1	0.944444	0.857143	1	0.85	1	NA	1	0.833333	1	0.986842	0.952381	0.833333	0.928571	1	0.822222	0.846154	0.9375	0.692308	0.727273
chr19.1817030	-8.8531	0.0315795	+	promoter	North_shore	ATP8B3	NM_001178002;NM_138813	148229	0.888889	0.944444	0.888889	1	0.857143	1	1	1	0.95	0.909091	1	0.96875	0.8	0.789474	0.96	0.789474	0.794118	0.833333	0.75	0.758621
chr19.1817724	-19.4227	0.00113153	-	promoter	North_shore	REXO1	NM_020695	57455	1	1	1	NA	1	1	NA	1	1	0.909091	1	0.772727	0.913043	0.923077	NA	0.666667	1	0.714286	0.8	0.6
chr19.1817861	-16.4555	0.0241733	-	promoter	North_shore	LOC100288123	NR_034114	100288123	0.583333	0.782609	0.769231	1	0.833333	1	1	1	0.619048	0.8125	1	0.762712	0.653846	0.9	0.52381	0.771429	0.8125	0.764706	0.870968	0.586957
chr16.1819449	-16.5625	0.0161527	-	utr3	North_shore	EME2	NM_001010865	197342	0.54902	0.56	0.366667	1	0.45122	0.5	0	0.508197	0.5	0.551724	0.447761	0.337662	0.320755	0.233333	0.24	0.214286	0.5	0.409091	0.368421	0.447368
chr16.1820125	-12.7259	0.0110835	+	utr3	North_shore	MAPK8IP3	NM_015133;NM_001040439	23162	1	0.777778	0.866667	1	0.941176	0.8	1	1	0.666667	0.888889	1	0.826531	0.846154	0.75	0.746479	0.606061	0.888889	0.785714	0.941176	0.833333
chr16.1820169	-15.1776	0.0263324	+	utr3	North_shore	MAPK8IP3	NM_015133;NM_001040439	23162	1	0.888889	0.866667	1	0.882353	0.8	1	1	0.571429	0.777778	0.666667	0.795918	0.846154	0.5	0.788732	0.909091	0.555556	0.642857	0.705882	0.75
chr16.1821424	2.10193	0.0274712	+	promoter	Cpg_island	EME2	NM_001010865	197342	0	0	0	0	0	0	0	0	0	0	0	0.0434783	0	0	0	0	0	0	0	0.0714286
chr16.1821430	2.10193	0.0274712	+	promoter	Cpg_island	EME2	NM_001010865	197342	0	0	0	0	0	0	0	0	0	0	0	0.0434783	0	0	0	0	0	0	0	0.0714286
chr16.1821435	2.09964	0.0288734	+	promoter	Cpg_island	NME3	NM_002513	4832	0	0	0	0	0	0	0	0	0	0	0	0.0444444	0	0	0	0	0	0	0	0.0714286
chr16.1822379	4.45309	0.030951	-	promoter	Cpg_island	MRPS34	NM_023936	65993	0	0.047619	0	0	0.0227273	0.0769231	0	0	0	0	0	0.0606061	0	0.2	0	0.105263	0.0588235	0	0.111111	0
chr16.1822562	-3.66109	0.0468908	-	promoter	Cpg_island	NME3	NM_002513	4832	0	0	0.2	0	0	0.111111	NA	0	0	0.142857	0	0	0	0	0	0	NA	0	0	0
chr16.1826981	-12.9758	0.0353787	+	utr3	North_shore	SPSB3	NM_080861	90864	0.969697	0.882353	0.555556	1	0.808989	0.789474	0.8	0.763158	0.818182	0.843137	0.875	0.827586	0.943396	0.489796	0.723404	0.636364	0.482759	0.793103	0.705882	0.53125
chr16.1831445	-17.5223	0.0327264	+	promoter	North_shore	NUBP2	NM_012225	10101	0.777778	0.410714	0.444444	1	0.724138	0.538462	0.689655	0.5	0.59375	0.529412	0.401198	0.410526	0.16129	0.472222	0.388889	0.479452	0.5	0.363636	0.666667	0.46
chr16.1831468	10.0005	0.0242337	+	promoter	North_shore	NUBP2	NM_012225	10101	0	0.0952381	0.097561	0	0.0724638	0.1875	0.461538	0.114286	0.322581	0.214286	0.157407	0.217391	0.236364	0.305556	0.113924	0.320513	0.2	0.235294	0.291667	0.208955
chr16.1831777	3.74759	0.0384625	+	promoter	Cpg_island	NUBP2	NM_012225	10101	0	0	0	0	0	0	0	0	0	0	0	0	0.166667	0	0	0.151515	0	0	0.0588235	0
chr16.1831778	-1.22145	0.0489153	-	promoter	Cpg_island	NUBP2	NM_012225	10101	0	0.0444444	0	0	0.030303	0	0	0	0.047619	0	0	0	0	0	0	0	0	0	0	0
chr17.1838166	13.6544	0.0161487	-	utr3	North_shore	NUBP2	NM_012225	10101	0.571429	1	0.75	0.818182	0.942857	1	0.333333	1	0.769231	0.875	0.966667	1	1	1	1	0.875	1	1	1	0.809524
chr17.1839555	14.8089	0.0182448	-	utr3	North_shore	RTN4RL1	NM_178568	146760	0.4	1	0.5	NA	0.857143	NA	1	1	NA	0.9	1	1	1	1	1	1	1	1	1	NA
chr16.1843876	22.8097	0.00174233	+	promoter	South_shore	IGFALS	NM_001146006;NR_027389;NM_004970	3483	0.52381	0.464286	0.409091	0.0666667	0.55	0.307692	0.444444	0.5	0.454545	0.536585	0.339506	0.792683	0.527778	0.583333	0.69697	0.724138	0.78	0.52381	0.6	0.5
chr16.1843883	15.274	0.0272647	+	promoter	South_shore	IGFALS	NM_001146006;NR_027389;NM_004970	3483	0.604651	0.315789	0.272727	0.695652	0.4875	0.230769	0.0555556	0.125	0.425	0.434783	0.471591	0.54878	0.594595	0.540541	0.454545	0.689655	0.576923	0.4	0.545455	0.527027
chr16.1844019	8.42749	0.029075	+	promoter	South_shore	IGFALS	NM_001146006;NR_027389;NM_004970	3483	0.030303	0	0.2	0	0.0555556	0	0	0	0.0526316	0.0588235	0	0.166667	0.0625	0.0952381	0.1875	0.382353	0.047619	0	0.08	0.025
chr1.1848704	10.0262	0.0263173	+	utr3	North_shore	CALML6	NM_138705	163688	0	0.0625	0.166667	0	0	0	0	NA	0	0	0	0.25	NA	0	0.166667	0.264706	0.133333	0	0	0.04
chr1.1851264	22.1266	0.0384737	+	promoter	Cpg_island	TMEM52	NM_178545	339456	0	0.181818	0.125	NA	0.333333	0.2	NA	0.555556	0.333333	0.25	0.5	0.6	0.818182	0.333333	0.833333	0.368421	0.384615	NA	0.238095	0.384615
chr1.1851276	-3.9919	0.0398855	-	promoter	Cpg_island	TMEM52	NM_178545	339456	0	0.2	0	0	0	0	0	0	0.0555556	0	0.2	0	0	0	0	0	0	0	0	0
chr19.1853476	2.08156	0.0429129	+	utr3	North_shore	KLF16	NM_031918	83855	0	0	NA	0	0	0	0	0	0	0	0	0.04	0	0.0625	0	0	0	0	0.125	0
chr19.1853492	13.3967	0.00176404	-	utr3	North_shore	KLF16	NM_031918	83855	NA	0	0	0	0	0.0909091	0	0	0.142857	0	0	0.0357143	0.206897	0.2	0.117647	NA	0	0.2	0.25	0.3
chr11.1853958	0.741546	0.044899	-	promoter	intercpg	SYT8	NM_138567	90019	0	0	0	0	0	0	0	0	0	0	0	0	0	0.0357143	0	0	0	0	0.025641	0.02
chr11.1854423	7.31879	0.0169898	-	promoter	intercpg	SYT8	NM_138567	90019	0.857143	0.818182	1	1	0.85	0.941176	1	0.973684	0.923077	1	0.75	1	1	1	1	1	1	1	0.875	1
chr5.1856774	13.5949	0.029421	+	promoter	Cpg_island	-	-	-	0.666667	NA	0.846154	0.571429	0.846154	0.714286	0.508772	0.694444	0.375	0.833333	0.810345	0.980769	0.845238	0.931034	0.75	0.567568	0.913043	0.84375	0.827586	0.833333
chr4.1857778	2.57675	0.041088	-	utr5	Cpg_island	LETM1	NM_012318	3954	0	0	0	0	0	0	0	0	0	0	0	0.116279	0	0	0.0172414	0.0263158	0	0	0	0
chr16.1859344	18.5875	0.0295114	+	utr3	intercpg	HAGH	NM_001040427;NM_005326	3029	0.535714	0.296296	0.272727	0	0.4	0.333333	0.0769231	0.0909091	0.357143	0.470588	0.04	0.614035	0.461538	0.190476	0.255319	0.469388	0.324324	0.5625	0.428571	0.482143
chr11.1859446	8.56691	0.00789553	-	promoter	intercpg	TNNI2	NM_001145841;NM_003282;NM_001145829	7136	0	0	0.05	0	0.0333333	0	0	0	0.111111	0	0	0.0151515	0.238095	0	0	0.103448	0.272727	0.2	0.2	0.130435
chr11.1859474	17.4458	0.0300024	+	promoter	intercpg	TNNI2	NM_001145841;NM_003282;NM_001145829	7136	0.0454545	0.72	0.636364	0.75	0.679245	0.5	0.56	0.78125	0.36	0.73913	0.633333	0.842857	0.571429	0.777778	0.818182	0.789474	0.916667	0.666667	0.875	0.6
chr11.1859475	-13.5491	0.0492786	-	promoter	intercpg	HAGH	NM_001040427;NM_005326	3029	1	0.941176	0.8	1	0.766667	0.888889	1	0.863636	0.75	0.631579	1	0.878788	0.9	0.888889	0.428571	0.862069	0.636364	0.8	0.5	0.73913
chr19.1863955	1.38879	0.0125058	-	promoter	Cpg_island	KLF16	NM_031918	83855	0	0	0	0	0	0	0	0	0	0	0	0.037037	0	0	0.0243902	0	0	0	NA	0
chr19.1864607	-3.88545	0.0407814	-	promoter	Cpg_island	KLF16	NM_031918	83855	0	0.08	0	0	0.16	0	0	0	0	0	0.0625	0	0	0	0	0	0	0	0	0
chr19.1864622	2.35146	0.0418137	+	promoter	Cpg_island	KLF16	NM_031918	83855	0	0	0	0	0	NA	0	0	0	0	0	0	0.0344828	0	0	0.181818	0	0	0.0333333	0
chr11.1873841	15.0461	0.0442819	-	promoter	intercpg	LSP1	NM_002339	4046	0.0714286	0.810811	0.73913	0.71875	0.833333	0.888889	0.533333	0.880952	1	0.916667	0.72	1	0.956522	0.95	0.722222	1	0.647059	0.888889	0.875	0.944444
chr7.1885869	10.5764	0.0496464	-	promoter	South_shore	MAD1L1	NM_003550;NM_001013836;NM_001013837	8379	1	1	0.571429	1	0.8125	0.909091	NA	0.666667	0.866667	1	0.92	1	1	1	1	1	1	0.666667	1	1
chr11.1886412	12.0695	0.0332722	-	utr5	intercpg	LSP1	NM_001013253;NM_002339	4046	0.307692	0.181818	0	0	0.411765	0.125	0.285714	0.2	0	0.0454545	0.152174	0.3	0.428571	0.25	0.255319	0.136364	0.2	0.222222	0.341463	0.266667
chr11.1886443	8.9176	0.0164573	+	utr5	intercpg	LSP1	NM_001013253;NM_002339	4046	0	0.0506329	0.0333333	0	0.121739	0.0434783	0.179487	0.0625	0.0454545	0.0983607	0.139535	0.245714	0.0684932	0.0555556	0.533333	0.175	0.15942	0.0793651	0.171875	0.133333
chr5.1887059	4.11776	0.039547	+	utr5	Cpg_island	IRX4	NM_016358	50805	0	0	0.173913	0	0	0	0	0	0	0	0	0.0652174	0.106383	0	0.0615385	0	0.05	0	0.0454545	0
chr5.1887075	1.90985	0.0328594	-	utr5	Cpg_island	IRX4	NM_016358	50805	0	0	0	0	0	0	NA	0	0	0	0	0.0461538	0	0.0645161	0	0	0.0540541	0	0	0
chr5.1887090	-1.39047	0.0209028	+	utr5	Cpg_island	IRX4	NM_016358	50805	0	0	0	0	0	0	0	0	0.0714286	0.0344828	0.0272727	0	0	0	0	0	0	0	0	0
chr5.1887099	2.49534	0.030851	-	promoter	Cpg_island	IRX4	NM_016358	50805	0	0	0	0	0	0	NA	0	0	0	0	0.084507	0	0	0.0545455	0	0	0	0.047619	0
chr11.1890057	30.5385	0.000411947	-	utr5	North_shore	LSP1	NM_001013254;NM_001013253;NM_001013255;NM_002339	4046	0	0.181818	0	0	0	NA	0	0	0.1	0.153846	0.0172414	0.928571	0.214286	0.466667	0.153846	0.185185	0.555556	0.25	0.25	0.266667
chr11.1890088	35.3039	0.00171393	-	utr5	North_shore	LSP1	NM_001013254;NM_001013253;NM_001013255;NM_002339	4046	0	0.0909091	0	0	0.454545	NA	0	0	0	0.461538	0.0701754	0.933333	0.296296	0.333333	0.615385	0.407407	0.555556	0.375	0.125	0.266667
chr19.1912432	24.4335	0.0297736	+	utr5	Cpg_island	SCAMP4	NM_079834	113178	0	0.571429	0.222222	0	0.764706	0.466667	NA	0.5	0.666667	0.5	0.5	0.744186	0.8	0.8	0.857143	0.75	0.529412	0.375	0.625	0.4
chr19.1912485	-28.8468	0.00304261	+	utr5	Cpg_island	SCAMP4	NM_079834	113178	1	0.555556	0.785714	1	0.5	0.5	1	0.5	0.538462	0.736842	0.509434	0.36	0.272727	0.285714	0.28	0.307692	0.0909091	0.583333	0.285714	0.72
chr19.1912642	-7.39394	0.0420273	+	utr5	Cpg_island	ADAT3	NM_138422	113179	1	0.952381	1	NA	1	1	NA	1	1	1	1	1	0.970588	1	1	0.444444	0.8	1	0.9	0.869565
chr16.1922051	5.187	0.0173266	+	utr5	Cpg_island	C16orf73	NM_001163560;NM_152764	254528	0	0	0	0	0	0	0	0	0	0	0	0.0909091	0	0	0	0.125	NA	0.25	0	0
chr16.1922063	5.48094	0.00817948	-	utr5	Cpg_island	KBTBD11	NM_014867	9920	0	0	0	0	0	0	0	0	0	0	0	0	0	0	0	0.114286	0.25	0	0.133333	0.0625
chr19.1924645	16.7347	0.00367108	+	utr3	Cpg_island	SCAMP4	NM_079834	113178	0.571429	0.647059	0.5	1	0.571429	0.846154	NA	0.842105	0.928571	0.88	0.75	1	0.857143	1	0.944444	0.941176	0.875	0.833333	1	0.888889
chr19.1925764	-9.85089	0.0416649	+	utr3	South_shore	SCAMP4	NM_079834	113178	1	1	0.866667	NA	1	1	NA	1	1	1	1	1	0.833333	0.909091	1	0.9	1	1	0.461538	0.714286
chr17.1931966	19.2602	0.0328065	+	promoter	North_shore	-	-	-	0.22	0.614035	0.15	0	0.693182	0.428571	0.411765	0.508772	0.472222	0.702703	0.347107	0.55102	0.641026	0.5	0.923077	0.597403	0.574074	0.428571	0.615385	0.616438
chr17.1933035	19.1805	0.00663318	+	promoter	North_shore	DPH1	NM_001383	1801	0.333333	0.272727	0	0	0	0	0	0	0.333333	0.15	0.025	0.4375	0.181818	0.444444	0.169811	0.160714	0.16	0.3	0.1	0.375
chr17.1933166	-6.69562	0.0410329	+	promoter	Cpg_island	RTN4RL1	NM_178568	146760	0	0.105263	0	NA	0	0.166667	NA	0	0.173913	0.136364	0.180328	0	0.025641	0.04	0	0	0.111111	0.15	0	0
chr16.1934866	15.9641	0.0495602	-	promoter	intercpg	NCRNA00254	NR_033914	64735	0.0769231	0.454545	0.25	0	0.191176	0.25	0	0	0.48	0.375	0.31746	0.25	0.5	0.2	0.444444	0.525	0.416667	0.304348	0.285714	0.230769
chr1.1936260	-7.76692	0.00828832	+	promoter	South_shore	KIAA1751	NM_001080484	85452	1	1	1	1	0.90625	1	1	0.894737	0.958333	0.954545	0.980769	0.928571	0.846154	0.9375	1	0.758621	0.904762	1	0.823529	0.88
chr1.1936453	13.6994	0.0229723	-	promoter	South_shore	KIAA1751	NM_001080484	85452	0.45	0.35	0.375	0.62069	0.459459	0.538462	0.352941	0.592593	0.366667	0.514286	0.605263	0.625	0.684211	0.526316	0.77193	0.823529	0.222222	0.764706	0.6	0.47619
chr1.1936490	-9.25408	0.0102856	+	promoter	South_shore	KIAA1751	NM_001080484	85452	1	1	NA	NA	1	1	1	1	1	1	1	1	1	0.818182	0.714286	1	1	0.857143	0.925926	0.823529
chr1.1936491	-10.7558	0.0106204	-	promoter	South_shore	KIAA1751	NM_001080484	85452	1	0.948718	0.9375	1	1	0.923077	1	0.924528	0.963636	0.880597	1	1	0.833333	0.833333	0.787611	1	0.777778	0.878788	0.72973	0.710843
chr1.1936684	17.0039	0.00837764	+	promoter	South_shore	KIAA1751	NM_001080484	85452	1	0.75	NA	0.533333	0.731707	0.571429	NA	1	0.692308	0.827586	0.833333	1	0.846154	1	1	0.863636	1	0.785714	0.785714	1
chr12.1937256	-14.9278	0.0494296	-	utr5	intercpg	LRTM2	NM_001039029;NM_001163925;NM_001163926	654429	1	1	0.705882	1	0.615385	0.8	1	0.956522	0.933333	0.724138	0.914634	0.788732	0.744186	0.916667	0.266667	0.604651	1	0.619048	0.818182	0.791667
chr12.1943920	-21.9686	0.00631144	+	utr3	intercpg	CACNA2D4	NM_172364	93589	1	1	0.9	1	1	1	0.857143	1	0.9	1	0.914286	0.658537	0.866667	1	0.521739	0.416667	0.5	0.333333	1	0.888889
chr12.1944070	-29.4865	0.012216	+	utr3	intercpg	CACNA2D4	NM_172364	93589	0.689655	0.777778	0.846154	1	0.78125	NA	1	NA	0.181818	0.846154	0.833333	0.645161	0.76	0.545455	0.0357143	0.482759	0.4	0.625	0.4375	0.428571
chr1.1950447	-7.66193	0.0060813	-	promoter	Cpg_island	GABRD	NM_000815	2563	0	0	0.25	0	0.0666667	0	NA	0.125	0	0.125	0.192308	0	0	0	0	0	0	0	0	0
chr1.1950462	-2.29855	0.0391902	-	promoter	Cpg_island	GABRD	NM_000815	2563	0	0.0714286	0	0	0	0.1	NA	0	0	0.0416667	0	0	0	0	0	0	0	0	0	0
chr1.1950577	6.00564	0.0238359	+	promoter	Cpg_island	GABRD	NM_000815	2563	0	0	0.142857	NA	0	0	0	0	0	0	0	0.03125	0	0	0	0.222222	0.153846	0	0.105263	0.0555556
chr19.1952931	7.54648	0.0143773	+	utr5	North_shore	CSNK1G2	NM_001319	1455	0	0	0.210526	0	0.0144928	0.0833333	0	0	0.0769231	0.0232558	0	0.126437	0	0.0857143	0.140625	0.212121	0.111111	0.047619	0	0.1875
chr19.1953406	-16.536	0.034043	+	utr5	North_shore	CSNK1G2	NM_001319	1455	0.846154	0.916667	0.8	1	1	0.6	NA	1	0.5	0.777778	1	0.366667	0.783784	0.571429	0.913043	0.657895	0.684211	0.916667	0.8	0.833333
chr17.1954693	3.10577	0.028482	+	promoter	Cpg_island	MIR212	NR_029625	406994	0	0	0	NA	0	0	NA	0.0263158	0	0	0	0.04	0	0	0	0.121951	0.0689655	0	0	0.0384615
chr17.1958969	-10.2557	0.000397318	-	promoter	Cpg_island	HIC1	NM_001098202;NM_006497	3090	NA	0.115385	0.153846	NA	0.12	0.125	NA	0	0.0952381	0.0769231	0.185185	0	0.030303	0	0.0377358	0	0	0	0.030303	0
chr17.1959066	6.35968	0.00281284	+	promoter	Cpg_island	HIC1	NM_001098202;NM_006497	3090	0.0704225	0	0	0	0.0107527	0	0	0	0	0	0.0140845	0.151515	0.111111	0.15	0.157895	0.0595238	0.0204082	0.025641	0	0.0363636
chr17.1959069	11.6894	0.0223795	+	promoter	Cpg_island	HIC1	NM_001098202;NM_006497	3090	0.135135	0.15625	0.105263	0	0.102041	0.111111	0	0	0.227273	0.142857	0	0.392857	0.1875	0.307692	0.291667	0.2	0.0625	0.037037	0.129032	0.190476
chr17.1959122	12.31	0.0460852	-	promoter	Cpg_island	HIC1	NM_001098202;NM_006497	3090	0.225806	0.0895522	0	0	0.116279	0.133333	0	0	0.233333	0.277778	0.116279	0.425532	0.411765	0.0652174	0.489362	0.127273	0.0833333	0.133333	0.162162	0.3
chr1.1962071	-9.34244	0.0207105	+	utr3	South_shore	HS3ST6	NM_001009606	64711	0.785714	0.918919	0.933333	1	0.973684	1	NA	0.941176	0.913043	0.921053	0.961039	0.887931	0.8	0.708333	1	0.702703	0.897436	0.868421	0.888889	0.6875
chr11.1967935	14.8772	0.04906	+	promoter	North_shore	HS3ST6	NM_001009606	64711	0.75	0.615385	0.777778	NA	0.642857	0.625	0.333333	0.571429	0.666667	0.875	0.82716	0.68	1	0.75	0.692308	0.692308	1	NA	1	0.772727
chr11.1968259	3.54286	0.0354903	-	promoter	North_shore	MRPL23	NM_021134	6150	0	0	0	0	NA	0	NA	0	0	0	0	0	0.181818	0	0	0	0.0434783	0.0909091	0	0
chr19.1969666	3.10224	0.0328002	+	utr5	Cpg_island	HS3ST6	NM_001009606	64711	1	1	0.833333	1	0.882353	0.909091	NA	0.944444	1	1	1	1	1	1	1	1	1	1	1	1
chr16.1969666	3.29106	0.0294993	+	promoter	South_shore	HS3ST6	NM_001009606	64711	0	0	0	0	0	0	NA	0	0	0	0.00943396	0.146341	0.0212766	0	0	0.0625	0.0731707	0	0	0.025
chr16.1969684	9.1508	0.0292412	+	promoter	South_shore	HS3ST6	NM_001009606	64711	0	0	0	0	0.194444	0	NA	0.0625	0.0833333	0	0.015625	0.0684932	0	0	0.176471	0.283582	0.210526	0.166667	0	0.0909091
chr1.1980326	3.96815	0.0202747	+	promoter	North_shore	PRKCZ	NM_002744	5590	0	0	0	NA	0	0	0	0	0	0	0	0.0465116	NA	0	0.210526	0.0454545	0	0	0	0
chr19.1980826	11.7147	0.0383415	-	utr3	Cpg_island	CSNK1G2	NM_001319	1455	1	0.9375	NA	1	0.666667	1	NA	0.885714	0.833333	0.923077	0.6	1	0.935484	1	1	0.636364	1	1	1	1
chr19.1980833	13.517	0.0210023	-	utr3	Cpg_island	CSNK1G2	NM_001319	1455	1	0.875	NA	1	1	0.666667	NA	0.823529	0.75	1	0.4	1	1	1	1	1	1	1	1	0.974359
chr19.1981014	-4.12963	0.0367957	-	utr3	Cpg_island	CSNK1G2	NM_001319	1455	1	1	1	1	0.980392	1	1	1	1	1	1	0.983333	1	1	1	0.694915	1	0.963636	0.906977	0.982906
chr19.1981125	-2.53593	0.0302124	+	utr3	South_shore	CSNK1G2	NM_001319	1455	1	1	1	1	1	NA	1	1	1	1	1	0.966667	1	1	1	1	1	0.888889	1	0.857143
chr1.1981444	2.03603	0.0415525	-	promoter	Cpg_island	-	-	-	0	0	0	0	0	0	0	0	0	0	0	0.0714286	0	0	0	0.037037	0	0	0.04	0
chr1.1981534	6.8951	0.00512387	-	promoter	Cpg_island	PRKCZ	NM_002744	5590	0	0	0	0	0	0	0	0	0	0.0769231	0	0.0714286	0	0	0.151515	0.222222	0	0.037037	0.08	0.129032
chr1.1981559	2.26687	0.0411532	+	promoter	Cpg_island	PRKCZ	NM_002744	5590	0	0	0	0	0	0	0	0	0	0	0	0.109589	0.0254237	0	0	0	0.0333333	0	0	0
chr1.1981779	1.20636	0.0491044	-	promoter	Cpg_island	PRKCZ	NM_002744	5590	0	0	0	0	0	0	0	0	0	0	0	0.0344828	0.0666667	0	0	0	0	0	0	0
chr19.1985881	-19.0079	0.0469291	+	utr3	Cpg_island	BTBD2	NM_017797	55643	1	0.764706	0.678571	NA	0.806452	0.8	0.307692	0.794118	1	0.666667	0.989474	0.6	0.272727	0.6	0.5	0.823529	0.75	0.75	0.666667	0.521739
chr19.1985891	5.97116	0.0144363	+	utr3	Cpg_island	BTBD2	NM_017797	55643	1	0.846154	0.846154	NA	0.966667	1	1	0.866667	1	0.875	1	1	1	1	1	1	1	1	1	1
chr19.1985916	-2.43291	0.0290427	-	utr3	Cpg_island	BTBD2	NM_017797	55643	NA	1	1	NA	1	1	NA	1	1	1	1	0.975	0.894737	1	1	0.941176	1	NA	1	1
chr19.1986159	-20.6201	0.0297367	+	utr3	Cpg_island	BTBD2	NM_017797	55643	NA	0.636364	0.25	NA	0.714286	0.777778	0.933333	0.733333	0.666667	0.636364	0.926829	0.333333	0.5	0.6	0.9	0.285714	0.5	0.571429	0.571429	0.545455
chr4.1988572	-15.1556	0.0287927	-	promoter	South_shore	MIR943	NR_030641	100126332	1	1	1	1	0.75	1	NA	NA	0.777778	1	1	0.483871	0.904762	0.777778	0.9375	0.783784	0.818182	NA	0.916667	1
chr4.1989345	22.0765	0.0156333	+	promoter	South_shore	MIR943	NR_030641	100126332	0	0.285714	0	NA	0.434783	0.214286	0.533333	0.388889	0.210526	0.545455	0.633803	0.555556	0.8125	0.75	0.263158	0.625	0.75	0.4	0.592593	0.583333
chr4.1989483	11.161	0.0178362	+	promoter	South_shore	WHSC2	NM_005663	7469	0	0.0416667	0.3125	0	0	0.2	0	0	0	0.133333	0.08	0.304348	0.2	0.1	0.116279	0.212121	0	0.0714286	0.294118	0.08
chr16.1994743	42.4736	0.013908	-	promoter	South_shore	SEPX1	NM_016332	51734	0	0.875	0	0	0	NA	0	0.486486	0.777778	1	0.2	0.47619	0.904762	0.333333	0.833333	0.842105	1	1	0.666667	0.535714
chr16.1994859	-18.7719	0.00141376	+	promoter	South_shore	SEPX1	NM_016332	51734	0.72	0.5	0.608696	0.52381	0.419355	NA	0.5	0.571429	0.4	0.5	0.444444	0.33913	0.571429	0.166667	0.396226	0.277778	0.25	0.454545	0.285714	0.1
chr16.2004851	10.7533	0.041614	-	promoter	intercpg	NDUFB10	NM_004548	4716	0.06	0.153846	0.0769231	0	0.0333333	0.166667	0	0	0.32	0.125	0.271429	0.283019	0.166667	0.333333	0	0.261538	0.285714	0.2	0.136364	0.347826
chr1.2005143	6.25827	0.0282315	+	promoter	North_shore	PRKCZ	NM_001033581;NM_002744	5590	0	0	0	0	0	0	0	0	0	0	0	0.428571	0	0	0	0	0.0588235	0.125	0	0
chr1.2005181	8.8952	0.0136238	-	promoter	Cpg_island	LOC100133545	NR_024471	100133545	0	0	NA	0	0.0833333	0	0	0	0	0	0	0.0571429	0	0	0	0.3125	NA	0.148148	0.0882353	0.222222
chr1.2005196	6.22253	0.00981603	+	promoter	Cpg_island	PRKCZ	NM_001033581;NM_002744	5590	0	0	0.0909091	0	0	0	0	0	0.0204082	0	0	0.1875	0	0	0.205882	0.0327869	0.125	0.115385	0	0.010101
chr1.2005222	8.04206	0.031634	+	promoter	Cpg_island	MAD1L1	NM_003550;NM_001013836;NM_001013837	8379	0	0	0.166667	0	0	0	0	0	0.0769231	0	0	0	0	0	0.35	0.111111	0.193548	0.114286	0.105263	0.0232558
chr1.2005224	7.71643	0.0392904	+	promoter	Cpg_island	PRKCZ	NM_001033581;NM_002744	5590	0	0	0.166667	0	0	0	0	0	0.0769231	0	0	0	0	0	0.35	0.111111	0.193548	0.111111	0.105263	0.0117647
chr1.2005228	7.76485	0.034262	+	promoter	Cpg_island	PRKCZ	NM_001033581;NM_002744	5590	0	0	0.166667	0	0	0	0	0	0	0	0	0	0	0	0.35	0.111111	0.180328	0.111111	0	0.0232558
chr1.2005287	5.72559	0.0481962	+	promoter	Cpg_island	PRKCZ	NM_001033581;NM_002744	5590	0	0.0166667	0	0.35	0.0131579	0	0	0	0	0.0677966	0	0.0638298	0.109091	0	0.12	0.0819672	0.0555556	0.0277778	0.0277778	0.0909091
chr1.2005495	11.8915	0.0367581	+	utr5	Cpg_island	PRKCZ	NM_001033581;NM_002744	5590	0	0	0	0	0.315789	0	0	0.15	0.0714286	0.125	0	0.0434783	0.363636	NA	0	0.0833333	0.166667	0.142857	0.181818	0.272727
chr1.2005551	8.61657	0.0229935	+	utr5	Cpg_island	PRKCZ	NM_001033581;NM_002744	5590	0	0	0	0	0	0	0	0	0	0	0.1	0.0526316	0.0294118	0	0.470588	0.0588235	0	0.0909091	0	0.0625
chr16.2009360	1.57107	0.038806	+	promoter	North_shore	NDUFB10	NM_004548	4716	0	0	0	0	0	0	NA	0.0526316	0	0	0	0.0365854	0.0192308	0	0	0	0	0.0512821	0	0.0277778
chr16.2009523	2.04926	0.0408987	-	utr5	Cpg_island	NDUFB10	NM_004548	4716	0	0	0	0	0	0	NA	0	0	0	0	0.114754	0	0.0263158	0	0	0	0	0	0.0185185
chr16.2009566	0.567991	0.0407016	+	utr5	Cpg_island	NDUFB10	NM_004548	4716	0	0	0	0	0	0	0	0	0	0	0	0.0142857	0.0192308	0	0	0	0	0	0	0
chr11.2011204	18.3596	0.00713657	+	promoter	North_shelf	LOC100133545	NR_024471	100133545	0	0	0.15	0	0.181818	0.0833333	0	0.166667	0.185185	0	0.0813953	0.722222	0.222222	0.25	0.148936	0	0.25	0.266667	0.2	0.325581
chr11.2012237	-6.44538	0.0470865	+	promoter	North_shore	LOC100133545	NR_024471	100133545	0.0416667	0.166667	0.190476	NA	0.0909091	0.2	NA	0	0.0588235	0.117647	0.142857	0	0.0652174	0	0	0.0434783	0	0.125	0	0.2
chr4.2012289	-9.31307	0.0333728	-	promoter	South_shore	WHSC2	NM_005663	7469	1	0.714286	1	1	0.835821	0.866667	1	1	0.933333	0.95	1	0.705882	0.933333	1	0.893333	0.861111	0.935484	0.846154	0.842105	0.886792
chr19.2016479	-16.6709	0.0226796	+	promoter	intercpg	BTBD2	NM_017797	55643	0	0.975	1	1	1	1	NA	1	1	0.842105	1	0.880952	0.771429	0.945946	0.941176	0.619048	0.875	0.909091	0.860465	0.8
chr11.2018150	-12.5469	0.0335314	-	promoter	Cpg_island	MIR675	NR_030533	100033819	0.823529	0.537037	0.75	0.868852	0.703704	0.611111	0	0.659574	0.677419	0.833333	0.814433	0.443709	0.433333	0.617647	0.633803	0.5	0.647059	0.75	0.6	0.666667
chr11.2018168	-28.7924	0.0144427	+	promoter	Cpg_island	H19	NR_002196	283120	0.625	0.642857	0.454545	0.711538	0.125	NA	0.736842	0.208333	0.294118	0.6	0.72	0.0810811	0.529412	0.2	0	0	0.714286	0.416667	0.166667	0
chr11.2018169	-22.0853	0.0204382	-	promoter	Cpg_island	H19	NR_002196	283120	0.788235	0.396226	0.75	0.866667	0.173077	0.294118	0	0.44186	0.459016	0.826087	0.623037	0.295302	0.266667	0.21875	0.4	0.104167	0.265306	0.451613	0.466667	0.170455
chr11.2018205	17.063	0.0117458	+	promoter	Cpg_island	H19	NR_002196	283120	1	0.857143	0.75	0.711538	0.75	NA	0.666667	0.84	0.473684	0.8	0.711538	1	0.944444	1	1	0.785714	1	0.916667	0.6875	0.666667
chr16.2018970	17.3274	0.0481095	-	utr3	South_shore	TBL3	NM_006453	10607	NA	0.8	0.666667	1	0.777778	1	1	0.666667	0.909091	0.384615	0.842105	1	NA	0.5	1	1	0.705882	1	1	1
chr11.2020417	-18.2412	0.0320385	+	promoter	South_shore	H19	NR_002196	283120	0.74026	0.482353	0.433333	0.78	0.5	0.818182	0.944444	0.44898	0.578947	0.459459	0.489362	0.648936	0.513514	0.488372	0.1	0.375	0.323944	0.454545	0.209302	0.616667
chr11.2020434	-18.8038	0.0323685	+	promoter	South_shore	H19	NR_002196	283120	0.738562	0.447059	0.433333	0.752809	0.489796	0.636364	0.944444	0.387755	0.605263	0.39726	0.4	0.561497	0.561644	0.465116	0.05	0.296875	0.326241	0.424242	0.27907	0.508333
chr11.2021051	15.6592	0.0432126	-	promoter	South_shore	TBL3	NM_006453	10607	0.257143	0.166667	0.166667	0.510638	0.2	0.411765	0.3	0.411765	0.411765	0.516129	0.209302	0.8	0.538462	0.176471	0.463415	0.619048	0.521739	0.571429	0.235294	0.38
chr8.2022969	-7.91843	0.0468794	-	promoter	intercpg	MYOM2	NM_003970	9172	1	1	1	1	1	NA	1	1	1	0.966667	1	1	0.883721	1	0.545455	1	0.8	1	0.769231	1
chr16.2033673	5.06978	0.0317334	+	promoter	Cpg_island	NOXO1	NM_172167;NM_172168;NM_144603	124056	0	0	0	0	0	0	NA	0	0	0	0	0	0.0952381	0	0	0.1875	0.125	NA	0	0
chr16.2039705	6.5838	0.0236639	-	promoter	North_shore	SYNGR3	NM_004209	9143	0.163265	0.227273	0.0285714	0	0.125	0	0.130435	0.159091	0.129032	0.0930233	0.112676	0.160714	0.23913	0.136364	0.208955	0.111111	0.291667	0.212121	0.285714	0.0769231
chr16.2039863	2.0132	0.0272333	+	promoter	North_shore	SYNGR3	NM_004209	9143	0	0	0	0	0	0	0	0	0	0	0	0.0280374	0.117647	0	0	0	0.0701754	0	0	0
chr4.2042205	-12.7434	0.0105782	+	promoter	Cpg_island	MKNK2	NM_199054;NM_017572	2872	0.0277778	0.157895	0	0.392857	0.214286	0.125	0	0.113636	0.0689655	0.0816327	0.404762	0	0.175439	0	0	0	0	0.047619	0.037037	0
chr4.2042417	2.22291	0.0279828	+	promoter	Cpg_island	C4orf48	NM_001168243;NM_001141936	401115	0	0	0	0	0	0	0	0	0	0	0	0.0735294	0.0526316	0.0377358	0	0	0	0	0	0
chr4.2042435	2.22074	0.037416	+	promoter	Cpg_island	C4orf48	NM_001168243;NM_001141936	401115	0	0	0	0	0	0	0	0	0	0	0	0.11236	0.0222222	0	0.0277778	0	0	0	0	0
chr4.2042444	2.99665	0.0119289	-	promoter	Cpg_island	C4orf48	NM_001168243;NM_001141936	401115	0	0	0	0	0	0	0	0	0	0	0	0.0526316	0	0	0	0	0	0	0	0.0789474
chr4.2042451	2.13952	0.0409578	-	promoter	Cpg_island	C4orf48	NM_001168243;NM_001141936	401115	0	0	0	0	0	0	0	0	0	0	0	0.0526316	0	0	0	0	0	0	0	0.08
chr4.2042453	2.12785	0.0418614	-	promoter	Cpg_island	SYNGR3	NM_004209	9143	0	0	0	0	0	0	0	0	0	0	0	0.0526316	0	0	0	0	0	0	0	0.08
chr4.2043057	1.12295	0.0395571	-	promoter	Cpg_island	C4orf48	NM_001168243;NM_001141936	401115	0	0	0	NA	0	0	0	0	0	0	0	0	0.0350877	0	0	0	0.0263158	0	0	0.047619
chr4.2043283	4.28836	0.0107834	+	promoter	Cpg_island	C4orf48	NM_001168243;NM_001141936	401115	0	0	0	0	0	0	0	0	0	0	0	0.0140845	0	0.111111	0	0	0	0	0.125	0.126437
chr16.2048206	-19.3278	0.00192112	+	utr3	Cpg_island	ZNF598	NM_178167	90850	1	0.872093	0.769231	1	0.990826	0.85	1	0.988372	0.782609	0.701299	0.895954	0.719101	0.9	0.788462	0.717949	0.677966	0.84375	0.75	0.731707	0.495495
chr16.2048221	-9.72384	0.0289456	+	utr3	Cpg_island	ZNF598	NM_178167	90850	1	0.952381	0.769231	1	0.953271	0.8	1	1	0.880952	0.794521	0.952941	0.921348	0.724138	0.795918	1	0.862069	0.926316	0.658537	0.769231	0.873874
chr4.2060128	6.89111	0.0445608	+	promoter	Cpg_island	NAT8L	NM_178557	339983	0	0.04	NA	0	0	0	0	0	0	0.117647	0	0.357143	0.157895	0.0909091	0.0555556	0	0.117647	0	0.0571429	0
chr4.2060167	8.98581	0.0238953	+	promoter	Cpg_island	NAT8L	NM_178557	339983	0	0.04	NA	0	0.037037	0	0	0	0.105263	0.0588235	0	0.357143	0.263158	0.0833333	0	0	0.166667	0.05	0.171429	0.125
chr4.2060190	2.37952	0.0442927	+	promoter	Cpg_island	NAT8L	NM_178557	339983	0	0	NA	0	0	0	0	0	0	0	0	0.125	0.0384615	0.0333333	0	0	0	0	0	0
chr4.2061048	-1.53824	0.0386448	-	promoter	Cpg_island	NAT8L	NM_178557	339983	0	0	0	0	0	0	0	0	0.037037	0.0277778	0.0285714	0	0	0	0	0	0	0	0	0
chr4.2065923	6.16631	0.0468088	+	utr3	Cpg_island	NAT8L	NM_178557	339983	1	0.666667	1	NA	1	0.928571	NA	NA	0.857143	1	1	1	1	1	1	1	NA	1	1	1
chr4.2065940	9.00005	0.0284558	+	utr3	Cpg_island	NAT8L	NM_178557	339983	0.846154	1	0.9375	NA	0.766667	0.857143	NA	NA	0.857143	0.833333	1	1	1	0.857143	1	0.931818	NA	1	1	1
chr4.2066479	38.6089	0.00456527	+	utr3	South_shore	NAT8L	NM_178557	339983	0	0.5	0.555556	1	0.461538	0.6	0.216216	NA	0.857143	0.5	0.578947	1	1	0.5	1	1	NA	1	0.529412	0.785714
chr4.2068671	-23.8058	0.0160024	+	utr3	South_Shelf	NAT8L	NM_178557	339983	0.736842	0.466667	0.8	NA	0.333333	0.142857	1	0.875	0.692308	0.5	0.6	0.5	0.425	0.1	0.518519	0.25	0.5	0.5	0.307692	0.315789
chr16.2069823	3.62513	0.0224832	-	utr5	Cpg_island	NPW	NM_001099456	283869	NA	0	0	NA	0	0	0	0	0	0	0	0.0413793	0	0	0.139535	0	0	0.0454545	0	0
chr4.2070571	6.64886	0.0348031	+	utr3	intercpg	NAT8L	NM_178557	339983	0	0.04	0.0666667	0	0.125	0.1	0	0.185185	0.153846	0.0740741	0.020202	0.2	0.26	0.1	0.1	0.121212	0.0555556	0.0645161	0.0833333	0.0930233
chr16.2070635	-6.44372	0.0295531	+	utr3	Cpg_island	NPW	NM_001099456	283869	0.0519481	0.03125	0	0	0.190476	0.166667	0	0	0.142857	0.0294118	0.228916	0	0.0833333	0	0	0	0	0.03125	0	0
chr16.2070676	-7.59797	0.0226139	+	utr3	Cpg_island	NPW	NM_001099456	283869	0.207792	0.09375	0	0	0.219512	0.0833333	0	0	0.0740741	0.0294118	0.219512	0	0	0	0	0	0.0454545	0.09375	0	0
chr16.2070705	-3.54799	0.00738311	-	utr3	Cpg_island	NPW	NM_001099456	283869	0	0.0444444	0	0	0.0227273	0.133333	0	0.125	0	0.0638298	0.0676692	0	0	0.0294118	0	0	0	0	0.0416667	0
chr16.2070712	-3.56606	0.0300943	-	utr3	Cpg_island	NPW	NM_001099456	283869	0	0.0222222	0.230769	0	0.0681818	0.133333	0	0.125	0	0.0638298	0.0075188	0	0	0.0588235	0	0	0	0	0	0.0204082
chr16.2070754	-6.0302	0.0113918	+	utr3	Cpg_island	PRKCZ	NM_001033581;NM_001033582;NM_002744	5590	NA	0.0909091	0	NA	0	0.333333	0	0	0.1875	0	0.05	0	0	0	0	0	0	0	0	0
chr19.2073175	15.2806	0.0408268	+	utr3	North_shelf	MOBKL2A	NM_130807	126308	0.322581	0.681818	0.777778	0.592105	0.72	0.875	0.9	0.518519	0.8	0.6875	0.857143	0.934783	0.714286	1	1	0.803922	0.566667	0.714286	0.833333	0.904762
chr16.2075439	-14.5903	0.0272497	+	promoter	North_shore	SLC9A3R2	NM_001130012;NM_004785	9351	1	0.833333	1	1	0.833333	0.625	1	1	1	1	1	0.724138	0.9	1	NA	1	0.555556	0.846154	0.625	0.8
chr16.2075443	-7.13948	0.0257285	-	promoter	North_shore	SLC9A3R2	NM_001130012;NM_004785	9351	1	1	1	NA	1	NA	1	1	1	1	1	1	1	0.8	1	1	0.888889	1	1	0.733333
chr16.2088853	11.5016	0.0117126	+	utr3	Cpg_island	SLC9A3R2	NM_001130012;NM_004785	9351	NA	0.772727	0.538462	0.533333	0.73913	0.777778	0.714286	0.714286	0.590909	0.888889	0.6	0.714286	0.714286	0.8125	0.962963	0.795455	0.833333	0.684211	0.928571	0.75
chr16.2088892	27.3065	0.0039578	+	utr3	Cpg_island	SLC9A3R2	NM_001130012;NM_004785	9351	NA	0.268293	0.0769231	0.310345	0.549451	0.222222	0	0.507246	0.35	0.235294	0.281879	0.44898	0.52381	0.551724	0.923077	0.563218	0.4	0.540541	0.571429	0.423077
chr19.2095484	21.596	0.0212002	-	promoter	Cpg_island	IZUMO4	NM_001031735;NM_001039846	113177	NA	0.125	0	0	0	NA	NA	0.2	0.111111	0.1875	0.148936	0.512821	0.333333	0.166667	0	0.636364	NA	0.4	0.363636	0.296296
chr19.2095704	4.34315	0.038188	+	promoter	Cpg_island	MOBKL2A	NM_130807	126308	0	0	0	0	0.0454545	0	0	0	0	0	0	0.193548	0	0	0	0.0666667	0.0454545	0	0.047619	0.0416667
chr19.2096231	0.898045	0.0342448	-	promoter	Cpg_island	MOBKL2A	NM_130807	126308	0	0	0	0	0	0	0	0	0	0	0	0.0289855	0	0	0	0	0	0	0	0.015625
chr19.2097340	6.01154	0.0189188	+	promoter	Cpg_island	MOBKL2A	NM_130807	126308	0	0	0	0	0	0	0	0	0	0	0	0.148936	0.142857	0	0.176471	0	0	0	0	0
chr19.2097416	1.92143	0.000530086	-	promoter	Cpg_island	IZUMO4	NM_001031735;NM_001039846	113177	0	0	0	0	0	0	0	0	0	0	0	0.0256959	0	0	0.00743494	0.0497738	0.0133333	0	0.0377358	0.028777
chr16.2099683	-11.3752	0.00783883	+	promoter	South_shore	TSC2	NM_001077183;NM_001114382;NM_000548	7249	1	0.8	0.666667	1	0.818182	0.818182	NA	1	0.733333	0.888889	0.911765	0.806452	0.636364	0.714286	0.764706	0.870968	0.833333	1	0.666667	0.7
chr1.2118469	10.7666	0.0489314	+	utr5	South_shore	C1orf86	NM_001146310	199990	1	1	NA	NA	NA	0.9	1	0.4	0.666667	1	1	1	1	1	1	1	1	NA	1	1
chr1.2118492	-15.7327	0.0417319	+	utr5	South_shore	C1orf86	NM_001146310	199990	1	1	NA	NA	NA	0.9	1	1	0.833333	0.9	1	1	0.666667	0.428571	0.708333	1	0.571429	NA	1	0.6
chr1.2125205	6.73143	0.0209514	+	utr5	North_shore	C1orf86	NM_182533;NM_001146310	199990	1	0.9375	0.864865	1	0.947368	1	1	0.875	0.769231	0.916667	0.759398	1	0.916667	1	1	0.975	0.964286	1	1	1
chr1.2125206	9.76739	0.0429051	-	utr5	North_shore	C1orf86	NM_182533;NM_001146310	199990	0.37037	0.958333	1	1	0.876712	0.75	NA	1	0.884615	1	1	1	1	1	1	1	1	1	1	0.971014
chr1.2125272	-17.6736	0.0209802	+	utr5	North_shore	LOC100128003	NR_024445	100128003	1	0.515152	0.625	0.806452	0.380952	0.583333	NA	0.421053	0.482759	0.541667	0.758242	0.3	0.2	0.428571	0.55	0.323529	0.4	0.384615	0.652174	0.542857
chr1.2130694	5.48724	0.047509	+	utr5	intercpg	C1orf86	NM_182533;NM_001146310	199990	0	0	0	0	0	0	0	0	0	0	0	0.313725	0	0	0	0	0	0.0434783	0.117647	0
chr1.2130776	-3.83787	0.024914	-	utr5	intercpg	C1orf86	NM_182533;NM_001146310	199990	0	0	0.0666667	NA	0	0	NA	0.0384615	0.142857	0.135135	0.0243902	0	0.0322581	0	0	0	0	0	0	0
chr1.2130808	-2.74553	0.02244	-	utr5	intercpg	C1orf86	NM_182533;NM_001146310	199990	0	0	0.0666667	NA	0	0.0625	NA	0	0.130435	0.0512821	0.0243902	0	0.0294118	0	0	0	0	0	0	0
chr1.2139175	-16.7771	0.0402344	+	promoter	South_shore	C1orf86	NM_001146310	199990	0.666667	0.259259	0.0357143	0.5	0.285714	0.5	0.777778	0.407407	0.333333	0.266667	0.64486	0.319444	0.0967742	0.25	0.333333	0.0697674	0.289474	0.222222	0.0909091	0.338235
chr16.2141523	15.9658	0.0256907	-	promoter	Cpg_island	PKD1	NM_000296;NM_001009944	5310	NA	0	0.2	0	0	0.166667	0	0.416667	0	0.111111	0	0.153846	0.25	0	0.266667	0.0909091	0.4	0.333333	0.4	0.125
chr16.2141826	-21.7536	0.033919	-	promoter	Cpg_island	PKD1	NM_000296;NM_001009944	5310	0.571429	0.285714	0.230769	1	0.44	0.5	NA	0.142857	0.2	0.35	0.327586	0.190476	0.117647	0	0	0.454545	0.25	0	0.222222	0.571429
chr16.2141912	14.4085	0.0108179	+	promoter	Cpg_island	MIR1225	NR_030646	100188847	0.367347	0.3125	0.5	0.0714286	0.348837	0.230769	0.227273	0.333333	0.291667	0.285714	0.347222	0.47619	0.217391	0.153846	0.677419	0.411765	0.8	0.625	0.428571	0.5
chr16.2141925	14.8763	0.0283577	+	promoter	Cpg_island	PKD1	NM_000296;NM_001009944	5310	0.792453	0.777778	0.833333	0.285714	0.666667	0.75	1	0.833333	0.8	0.8	0.869048	0.952381	1	1	0.952381	0.820513	1	0.666667	1	0.781818
chr16.2141982	-18.7343	0.0149981	-	promoter	Cpg_island	MIR1225	NR_030646	100188847	0.932203	0.761905	0.714286	1	0.906977	0.888889	1	0.966102	0.791667	0.586207	0.82716	0.76	1	0.266667	0.807692	0.52	0.785714	0.4375	0.695652	0.630137
chr1.2144060	5.36934	0.048499	-	utr5	North_shore	C1orf86	NM_001146310	199990	0	0	0	NA	0	0	0	0	0.0526316	0	0	0	0.0555556	0.1875	0.112676	0	0	0	0	0.208333
chr1.2144461	1.63151	0.0176395	+	promoter	Cpg_island	-	-	-	0	0	0	0	0	0	0	0	0	0	0	0	0.0294118	0	0.0196078	0.047619	0	0	0	0.037037
chr1.2158462	-4.00197	0.0102472	-	promoter	Cpg_island	SKI	NM_003036	6497	0.114943	0	0.0517241	0	0	0.173913	0	0	0.111111	0.084507	0	0	0	0	0	0	0	0	0	0
chr11.2159132	-2.15414	0.0426076	-	promoter	Cpg_island	SKI	NM_003036	6497	0	0	0	NA	0.0483871	0	0	0.103448	0.037037	0	0	0	0	0	0	0	0	0	0	0
chr11.2160365	-1.44821	0.0107023	+	promoter	Cpg_island	IGF2AS	NR_028043;NR_028044	51214	0	0.0350877	0	0	0.025974	0	0	0	0	0.027027	0.0178571	0	0	0	0	0	0	0	0	0
chr11.2160640	7.37829	0.0403087	+	promoter	Cpg_island	INS-IGF2	NR_003512	723961	0	0	0	NA	0	0	0	0	0	0	0	0.514286	0	0	0	0.0454545	0	0	0.0434783	0
chr11.2162049	4.09787	0.047626	+	promoter	Cpg_island	IGF2	NM_001127598;NM_001007139;NM_000612	3481	NA	0	0	NA	0	0	0	0	0	0	0	0	0.0877193	0	0	0.147059	0	0	0.0625	0
chr11.2162142	8.16811	0.0147857	+	promoter	Cpg_island	IGF2AS	NR_028043;NR_028044	51214	NA	0	0	NA	0	0.166667	0	0.0434783	0	0.0526316	0	0.121951	0.109091	0	0	0.147059	0	0.222222	0.222222	0
chr11.2162511	-13.4177	0.0146748	-	promoter	South_shore	IGF2	NM_001127598;NM_001007139;NM_000612	3481	0.344828	0.357143	0.166667	0.4375	0.282051	0.4	0.315789	0.333333	0.307692	0.133333	0.444444	0.217391	0.470588	0.142857	0.0833333	0.0638298	0.4	0.25	0.166667	0.172414
chr11.2162546	-26.0559	0.00219599	-	promoter	South_shore	IGF2AS	NR_028043;NR_028044	51214	0.724138	0.714286	0.916667	1	0.578947	1	0.868421	0.740741	0.7	0.642857	0.615385	0.735294	0.588235	0.416667	0.483333	0.297872	0.64	0.5	0.636364	0.310345
chr11.2184040	-12.3798	0.0419177	+	promoter	North_shelf	INS	NM_001185097;NM_000207;NM_001185098	3630	1	0.5	0.5	0.73913	0.625	0.642857	1	0.745763	0.622222	0.764706	0.78626	0.518519	0.697674	0.628571	0.666667	0.611111	0.592593	0.24	0.736842	0.68
chr11.2184133	7.9273	0.0145312	+	promoter	North_shelf	INS-IGF2	NR_003512;NM_001042376	723961	1	0.65	0.857143	0.815217	0.948276	1	1	0.813559	0.888889	0.862745	0.853846	0.981818	1	0.96875	0.958333	0.971429	1	0.894737	0.894737	0.854167
chr11.2184145	14.7892	0.00156859	+	promoter	North_shelf	INS-IGF2	NR_003512;NM_001042376	723961	0	0.0909091	0.0909091	0.0891089	0.0483871	0.1875	0.05	0.129032	0.0217391	0.0545455	0	0.31746	0.208333	0.157895	0.25	0.477612	0.0357143	0.105263	0.130435	0.169492
chr20.2187672	5.19799	0.013131	-	utr5	Cpg_island	-	-	-	0	0	0	0	0	0	0	0	NA	0	0	0	0.0416667	0.153846	0	0	0	0.0588235	0	0.2
chr11.2192904	20.9168	0.0136815	+	promoter	intercpg	TH	NM_199293;NM_000360;NM_199292	7054	0	0.0833333	0.142857	0	0.304348	0.166667	0	0.4	0.190476	0.173913	0.393939	0.321429	0.448276	0.272727	0.818182	0.5	0.25	0.461538	0.0909091	0.208333
chr16.2197995	5.07692	0.020888	+	promoter	North_shore	RAB26	NM_014353	25837	0	0	0	0	0.0681818	0	0	0	0	0	0	0.0294118	0.111111	0.030303	0.272727	0	0.0952381	0	0	0.0384615
chr16.2198075	8.0032	0.0320598	+	promoter	North_shore	RAB26	NM_014353	25837	0	0.0526316	0	0	0.0697674	0.0909091	0	0	0.285714	0	0	0.0322581	0.148148	0.030303	0	0.375	0.0952381	0.0833333	0.0588235	0.125
chr16.2198080	9.87125	0.0383851	+	promoter	North_shore	RAB26	NM_014353	25837	0	0.0526316	0	0	0.0697674	0.0909091	0	0	0.285714	0	0.152174	0.0322581	0.148148	0.030303	0.272727	0.25	0.333333	0	0.0588235	0.26087
chr16.2198261	14.8907	0.0182097	-	promoter	North_shore	RAB26	NM_014353	25837	NA	0	0	0	0.125	NA	0	0	NA	0	0	0.134615	0.030303	0	0.6	0.380952	NA	0.2	0.0714286	0
chr16.2198263	15.2991	0.0362568	-	promoter	North_shore	RAB26	NM_014353	25837	NA	0.0909091	0	0	0.125	NA	0	0	NA	0	0.125	0.365385	0.030303	0.111111	0.6	0.380952	NA	0.2	0.0769231	0
chr16.2198353	9.35817	0.0380351	-	promoter	North_shore	RAB26	NM_014353	25837	NA	0	0	0	0	NA	0	0	NA	0	0	0.307692	0.0322581	0	0	0.238095	NA	0	0	0
chr17.2207836	4.57407	0.0458043	+	promoter	South_shore	TRAF7	NM_032271	84231	1	1	1	1	0.904762	0.8	1	0.915493	0.933333	1	0.822222	1	1	1	1	1	1	0.916667	1	1
chr17.2207973	-13.3395	0.0123393	+	promoter	South_shore	SRR	NM_021947	63826	0.617647	0.588235	0.52381	0.230769	0.56	0.47619	0.857143	0.75	0.521739	0.375	0.633663	0.40404	0.0625	0.533333	0.457831	0.419355	0.6	0	0.583333	0.446429
chr16.2227923	14.1476	0.0230165	-	utr3	North_shore	TRAF7	NM_032271	84231	0.107143	0.102564	0	0.0909091	0.255319	0.153846	0	0.307692	0.228571	0.125	0.197674	0.53125	0.307692	0.583333	0.111111	0.37037	0.25	0.2	0.384615	0.1
chr16.2228291	-28.499	0.0176325	-	utr3	Cpg_island	CASKIN1	NM_020764	57524	1	1	0.933333	1	0.8125	NA	1	0.4	0.777778	0.666667	0.607143	0.5	0.7	0.888889	0.1	0.631579	NA	0.285714	0.833333	0.555556
chr16.2228293	11.9124	0.00454414	-	utr3	Cpg_island	CASKIN1	NM_020764	57524	1	0.833333	0.933333	0.833333	0.9375	NA	1	0.4	0.888889	0.777778	0.785714	1	1	1	1	1	NA	1	0.916667	1
chr16.2228464	14.8343	0.0287533	+	utr3	Cpg_island	CASKIN1	NM_020764	57524	NA	0.875	0.714286	0.5	0.869565	0.875	NA	0.9	0.454545	0.8	0.650602	0.923077	0.857143	1	1	0.809524	0.916667	0.846154	0.65	1
chr19.2230215	-16.3632	0.0120248	-	utr3	Cpg_island	DOT1L	NM_032482	84444	1	1	0.8	NA	1	NA	1	1	1	0.9375	1	1	0.529412	1	0.6	0.882353	0.666667	NA	0.833333	0.869565
chr6.2245663	2.10105	0.031649	+	utr5	Cpg_island	GMDS	NM_001500	2762	0	0	0	0	0	0	0	0	0	0	0	0.0638298	0.0434783	0	0	0	0	0	0	0
chr6.2246697	0.943632	0.0334481	+	promoter	South_shore	CASKIN1	NM_020764	57524	0	0	0	0	0	0	0	0	0	0	0	0.025	0	0.0526316	0	0	0	0	0	0
chr16.2246921	3.36657	0.0228543	-	promoter	Cpg_island	CASKIN1	NM_020764	57524	NA	0	0	0	0	0	0	0	0	0	0	0	0	0.05	0	0.08	0.181818	0	0	0
chr19.2247500	17.5432	0.00931707	+	promoter	South_shore	SF3A2	NM_007165	8175	0.454545	0.3	0.416667	0.3	0.444444	0.428571	NA	0.833333	0.666667	0.538462	1	0.652174	0.727273	0.363636	0.666667	0.714286	0.428571	0.6	0.666667	0.818182
chr19.2247542	-12.7073	0.0393946	+	promoter	South_shore	AMH	NM_000479	268	0.904762	0.9	0.888889	NA	1	1	NA	1	0.8	0.818182	1	1	0.777778	0.6	1	0.659091	0.428571	0.857143	0.9	0.9
chr19.2248019	16.8623	0.0281609	+	promoter	South_shore	AMH	NM_000479	268	NA	0.0909091	0.636364	0	0.025	0	0	0	0	0.222222	0	0.285714	0.714286	0	0.173077	0.25	0.0833333	0.166667	0.181818	0.294118
chr19.2248303	13.6398	0.0117323	-	promoter	South_shore	MIR4321	NR_036207	100423031	0	0.75	0.833333	0.86	0.8125	0.9	NA	1	0.923077	0.88	0.777778	1	0.833333	1	1	0.974359	0.818182	1	0.904762	0.928571
chr19.2248397	-19.3265	0.0459651	+	promoter	South_shore	SF3A2	NM_007165	8175	1	1	1	1	0.878788	1	1	1	1	1	0.369565	0.913043	1	NA	0.764706	0.666667	0.888889	1	0.7	0.904762
chr19.2250312	-8.81397	0.032225	+	promoter	North_shore	AMH	NM_000479	268	NA	0	0	0.0357143	0	0	0.111111	0	0.1	0	0.358974	0	NA	0	0	0	0	0	0	0
chr19.2250627	20.1669	0.000200362	+	promoter	Cpg_island	AMH	NM_000479	268	0	0	0.2	NA	0.0869565	0.1	0	0.0714286	0.0322581	0	0	0.466667	0.0555556	0.142857	0.378378	0.2	0.285714	0.222222	0.25	0.114286
chr19.2251971	-20.2457	0.04272	-	utr3	Cpg_island	AMH	NM_000479	268	1	0.609756	0.714286	0.948718	0.781818	1	0.8	0.857143	0.590909	0.684211	0.773333	0.62069	0.0833333	1	0.238095	0.384615	0.574468	0.9	0.6875	0.824561
chr19.2251984	-34.3425	0.0143606	-	utr3	Cpg_island	AMH	NM_000479	268	1	0.6	0.571429	0.95	0.464286	0.8	0.8	1	0.227273	0.631579	0.412162	0.37931	0.0833333	0.75	0	0.0769231	0.148936	0.666667	0.4375	0.789474
chr19.2252283	-13.2038	0.024186	-	utr3	Cpg_island	MXD4	NM_006454	10608	0.615385	0.6875	0.45	NA	0.5	NA	0.956522	0.555556	0.588235	0.666667	0.540541	0.532468	0.448276	0.5	0.394737	0.413793	0.3125	0.448276	0.5625	0.666667
chr16.2258966	12.3137	0.0485348	+	utr3	South_Shelf	MLST8	NM_001199173;NM_001199175;NM_022372;NM_001199174	64223	0	0	NA	NA	0	0	0	0	0	0	0	0.645161	0	0	0	0.04	0.2	NA	0	0
chr16.2261957	-17.1598	0.0324395	+	promoter	North_shore	C16orf79	NM_182563	283870	0.45	0.121212	0	0	0.324324	0.5	NA	0.386364	0.333333	0.230769	0.296296	0.277778	0.25	0	0	0	0.25	0	0.105263	0.289474
chr16.2262071	-19.3171	0.00536583	+	promoter	North_shore	PGP	NM_001042371	283871	0.473684	0.0625	0	0	0.361111	0.583333	NA	0.363636	0.333333	0.384615	0.301887	0.203704	0.204545	0	0	0.030303	0.176471	0.05	0.210526	0.0526316
chr16.2262165	6.01354	0.0223811	+	promoter	North_shore	MORN1	NM_024848	79906	0	0	0	0	0	0	0	0	0	0.0357143	0	0.278689	0.142857	0.0740741	0	0	0.0740741	0.0714286	0	0
chr4.2264573	6.43104	0.0238423	+	promoter	Cpg_island	MXD4	NM_006454	10608	0	0.0238095	0	0	0	0	0	0	0	0	0.0982143	0.195402	0.0232558	0.111111	0	0.0645161	0.0517241	0	0.142857	0
chr16.2265094	2.39873	0.0319276	-	promoter	Cpg_island	PGP	NM_001042371	283871	0	0	0	0	0	0	0	0	0	0	0	0.103896	0	0	0.030303	0	0	0	0	0.0277778
chr16.2265302	0.956333	0.0172609	-	promoter	Cpg_island	C16orf79	NM_182563	283870	0	0	0	0	0	0	0	0	0	0	0	0.0307692	0	0	0	0	0.0263158	0	0.0128205	0
chr19.2273130	2.5639	0.0161807	+	utr3	Cpg_island	OAZ1	NM_004152	4946	0	0	0	0	0	0	0	0	0	0	0	0.0617284	0.114286	0	0	0	0	0.0357143	0.030303	0
chr7.2273504	20.4063	0.0491352	+	promoter	South_shore	SGSM2	NM_014853;NM_001098509	9905	0.529412	0.769231	0.533333	0.55	0.25	0	0.181818	0.333333	0.521739	0.846154	0.423729	0.4	0.625	0.65	0.75	0.521739	0.454545	1	0.888889	0.7
chr7.2280845	19.5669	0.0350071	+	promoter	North_shore	FTSJ2	NM_013393	29960	0	0.25	0.166667	0	0.535714	0.0833333	NA	0.0833333	0.181818	0.181818	0.395833	0.527273	0.433333	0.214286	0.0526316	0.529412	0.470588	0.333333	0.222222	0.5
chr19.2282680	19.8187	0.0368802	+	promoter	South_Shelf	C19orf35	NM_198532	374872	0.125	0.619048	0.363636	0.4	0.727273	NA	0.424242	0.862069	0.714286	0.6	0.5	1	0.454545	0.764706	0.666667	0.654321	0.793103	0.818182	0.684211	0.617647
chr17.2283577	-24.8705	0.00486137	+	utr3	intercpg	SGSM2	NM_014853;NM_001098509	9905	0.652174	0.47619	0.285714	0.666667	0.678571	0.857143	NA	1	0.307692	0.529412	0.787879	0.227273	0.4	0.47619	0.363636	0.25	0.538462	0.555556	0.583333	0.230769
chr1.2284766	20.8733	0.0133396	+	promoter	intercpg	LOC100129534	NR_024489	100129534	0.333333	0.608696	0.25	0.253165	0.540541	0.5	1	0.47619	0.642857	0.541667	0.69697	0.772727	0.725	0.652174	1	0.5	0.684211	0.555556	0.875	0.866667
chr1.2285179	-16.6707	0.0455281	-	promoter	intercpg	LOC100129534	NR_024489	100129534	0.3	0.0869565	0.185185	0.538462	0.414634	NA	0.135135	0.529412	0.294118	0.368421	0.0512821	0	0.130435	0	0.378378	0	0.529412	0.0740741	0.352941	0.08
chr16.2285568	29.8922	0.0315968	-	promoter	Cpg_island	DNASE1L2	NM_001374	1775	1	0.857143	0.333333	0	0.787234	0.571429	0.904762	0	0.2	0.8	0.846154	1	1	0.916667	NA	1	0.666667	1	0.625	0.666667
chr16.2286370	9.80021	0.00858283	+	promoter	North_shore	DNASE1L2	NM_001374	1775	NA	0.0714286	0	0	0	0.166667	0	0	0	0.0416667	0	0.0425532	0.0384615	0.166667	0.230769	0.235294	0.272727	0	0	0.225806
chr16.2286539	-8.06371	0.0254087	-	utr5	North_shore	DNASE1L2	NM_001374	1775	0.149254	0	0.030303	0.695652	0.0138889	0	0	0	0	0	0	0	0	0	0	0	0	0	0	0
chr19.2289982	9.43069	0.0411677	+	utr3	Cpg_island	LINGO3	NM_001101391	645191	0	0	0	0	0.1	NA	0	0	0	0	0.0714286	0	0.0625	0.363636	0.133333	0.0714286	0	NA	0.444444	0
chr11.2290076	3.10354	0.0432954	+	utr3	North_shore	ASCL2	NM_005170	430	NA	0	0	0	0	NA	NA	0	0	0	0	0	0.0517241	0.214286	0	0	0	0.025	0	0
chr11.2291703	3.80864	0.0314231	-	utr5	Cpg_island	ASCL2	NM_005170	430	0	0	0	0	0	0	0	0	0	0	0	0	0	0	0.16129	0	0.0571429	0	0.166667	0
chr11.2292038	6.36278	0.0172224	-	utr5	Cpg_island	ASCL2	NM_005170	430	0	0.111111	0	0	0.0322581	0.0909091	0	0	0	0.0666667	0	0.0952381	0	0	0.148148	0.0689655	0.115385	0.214286	0.05	0
chr11.2293164	-9.7402	0.0164545	+	promoter	South_shore	ASCL2	NM_005170	430	0.142857	0.181818	0.0909091	0.190476	0.1875	0.25	0.352941	0.363636	0.0833333	0.0833333	0.163265	0.259259	0.0714286	0.142857	0.0987654	0.08	0.133333	0	0.125	0.030303
chr11.2293171	-19.0324	0.0084898	+	promoter	South_shore	ASCL2	NM_005170	430	0.4	0.615385	0.166667	0.666667	0.319149	0.125	0.25	0.444444	0.416667	0.153846	0.148936	0.133333	0	0.5	0.270588	0.0714286	0.153846	0.176471	0	0.0606061
chr11.2293606	-13.4306	0.0307285	-	promoter	South_shore	ASCL2	NM_005170	430	0.813559	0.8	1	1	0.882353	0.6	1	1	0.888889	1	0.916667	0.822222	0.8	1	0.612903	0.56	0.777778	0.9375	0.571429	1
chr11.2293622	-24.6386	0.045908	-	promoter	South_shore	ASCL2	NM_005170	430	0.79661	0.84	0.555556	1	0.823529	0.6	0	0.533333	0.666667	0.5	0.666667	0.333333	0.6	0.444444	0	0.32	0.62963	0.6875	0.571429	0.2
chr11.2294015	-20.2116	0.0101345	+	promoter	South_shore	ASCL2	NM_005170	430	0.568182	0.666667	0.555556	0.428571	0.64	0.5	0.4	0.54717	0.516129	0.454545	0.490196	0.5	0.0487805	0.125	0.310345	0.574074	0.235294	0.235294	0.228571	0.638889
chr11.2294032	16.3296	0.0425758	-	promoter	South_shore	ASCL2	NM_005170	430	0.4	0.4	0.285714	1	0.685714	0.5	0.625	0.785714	0.439024	0.666667	0.710843	0.777778	1	0.75	0.645161	0.55	0.777778	0.625	1	0.888889
chr16.2303818	18.351	0.0308777	+	utr3	South_shore	RNPS1	NM_080594;NM_006711	10921	0.375	NA	0.352941	0.483871	0.615385	NA	0.666667	0.363636	0.2	0	0.166667	0.757576	0.5625	0.666667	0.5	0.666667	0.666667	0.5	0.333333	0.407407
chr17.2305943	5.22193	0.0352506	+	promoter	South_shore	MNT	NM_020310	4335	0	0.037037	0.0434783	NA	0.0714286	0.1	0	0.0243902	0.0227273	0.133333	0	0.175676	0.0243902	0.0263158	0.103448	0.116279	0.047619	0.151515	0.0487805	0.111111
chr19.2308087	2.53796	0.0152382	-	utr5	Cpg_island	LINGO3	NM_001101391	645191	0	0	0	0	0	0	0	0	0	0	0	0.0461538	0	0	0	0	0.166667	0	0.037037	0
chr19.2308203	3.13024	0.0443128	+	promoter	South_shore	LINGO3	NM_001101391	645191	0	0	0	0	0	0	0	0	0	0	0	0.142857	0	0	0	0	0	0	0.125	0
chr16.2317934	4.10579	0.0287433	+	promoter	Cpg_island	MIR3677	NR_037448	100500812	0	0	0	NA	0	0	0	0	0	0	0	0.0833333	0	0	0	0	0.222222	0	0.153846	0
chr16.2318691	3.59016	0.0328929	+	promoter	Cpg_island	MIR3677	NR_037448	100500812	0	0	0	0	0	0	0	0	0	0	0	0.178218	0.03125	0	0	0	0.016129	0	0	0
chr16.2318699	0.686561	0.0435422	+	promoter	Cpg_island	MIR3677	NR_037448	100500812	0	0	0	0	0	0	0	0	0	0	0	0.0196078	0.03125	0	0	0	0	0	0	0
chr16.2323514	-15.0371	0.0435237	+	promoter	intercpg	-	-	-	NA	0.714286	1	NA	1	1	1	0.857143	NA	1	1	0.666667	1	1	0.647059	0.954545	0.9	0.583333	NA	0.714286
chr11.2323896	31.6888	0.0155273	+	promoter	intercpg	C11orf21	NR_024621;NM_001142946	29125	0	0.391304	0.125	0	0.585366	NA	0	0.6	NA	0.533333	0.333333	0.59375	0.525	0.6	0.548387	0.375	0.294118	0.5	0.857143	0.95
chr11.2323929	25.2892	0.0273863	+	promoter	intercpg	TSPAN32	NM_139022	10077	0	0.391304	0.125	0.1	0.410256	NA	0	0.1	NA	0.533333	0.6	0.292308	0.309524	0.4	0.709677	0.375	0.411765	0.5	0.571429	0.857143
chr11.2324916	-16.5092	0.0146281	-	promoter	intercpg	C11orf21	NR_024621;NM_001142946	29125	1	1	1	1	0.833333	NA	NA	1	0.733333	1	1	0.428571	0.9	0.6	0.947368	0.941176	0.789474	1	0.9375	0.785714
chr16.2326139	14.8915	0.00759662	+	utr3	intercpg	ABCA3	NM_001089	21	0	0	0	NA	0	0	0	0.4	0	0	0	0.384615	0.111111	0	0.263158	0.285714	0.0909091	0.1	0	0.0285714
chr19.2330451	16.1585	0.0353471	+	promoter	South_shore	LSM7	NM_016199	51690	0.253521	0.1875	0.25	NA	0.0384615	NA	0.909091	0.166667	0.0909091	0.0714286	0.106061	0.484536	0.32	0.26087	0.462963	0.566667	0.34375	0.142857	0.34375	0.21875
chr1.2344586	2.63578	0.0244431	+	promoter	Cpg_island	PEX10	NM_153818;NM_002617	5192	0	0	0	0	0	0	0	0	0	0	0	0.0833333	0.166667	0.0588235	0	0	0	0	0	0
chr1.2344608	3.38669	0.00920019	+	promoter	Cpg_island	PEX10	NM_153818;NM_002617	5192	0	0	0	0	0	0	0	0	0	0	0	0.169014	0	0	0	0.0298507	0	0	0.0512821	0.00869565
chr1.2344671	2.94338	0.0207934	+	promoter	Cpg_island	PEX10	NM_153818;NM_002617	5192	0	0	0	0	0	0	0	0	0	0	0	0	0	0.214286	0.0430108	0	0	0	0	0.056338
chr19.2353179	-6.2058	0.0481255	+	utr3	Cpg_island	SPPL2B	NM_152988;NM_001077238	56928	1	1	1	1	0.916667	1	NA	1	1	1	1	1	0.941176	0.733333	1	1	1	1	0.857143	0.923077
chr19.2353398	15.1726	0.0455452	+	utr3	Cpg_island	SPPL2B	NM_152988;NM_001077238	56928	0	0.1875	0.125	0	0.208333	0.111111	0	0.117647	0.368421	0.4	0.0789474	0	0.2	0.230769	0.761905	0.258065	0.173913	0.166667	0.421053	0.295455
chr19.2353515	20.575	0.0322342	+	utr3	Cpg_island	SPPL2B	NM_152988;NM_001077238	56928	NA	0.875	0.933333	0	0.833333	NA	0.714286	0.666667	NA	0.944444	0.875	1	0.904762	1	0.7	0.971429	0.888889	1	0.875	1
chr7.2354406	4.20912	0.0330704	-	promoter	South_shore	SNX8	NM_013321	29886	0	0.046875	0	0	0	0	0	0.0172414	0.0147059	0.0533333	0	0	0.114754	0.0961538	0.0172414	0	0.195652	0.0175439	0.1	0.0555556
chr7.2354416	3.90013	0.0109265	-	promoter	South_shore	SNX8	NM_013321	29886	0	0.0307692	0	0	0.0449438	0	0	0	0.0294118	0	0	0.0625	0.0806452	0.0576923	0	0	0.130435	0.0338983	0.0655738	0.0222222
chr19.2354889	-20.2531	0.00443823	-	utr3	South_shore	SPPL2B	NM_152988;NM_001077238	56928	1	1	1	1	0.866667	0.8	1	1	1	1	1	0.571429	1	0.814815	0.851852	1	0.909091	0.95	0.785714	0.25
chr19.2354911	31.9204	0.0291674	-	utr3	South_shore	SPPL2B	NM_152988;NM_001077238	56928	0	0	0.545455	0	0.26087	0.2	0	0.75	0.0833333	0	0.588235	1	0.714286	0.470588	0.222222	NA	0.75	0.538462	0.111111	0.1875
chr4.2366670	17.7126	0.00707971	-	promoter	Cpg_island	ZFYVE28	NM_020972;NM_001172658;NM_001172656;NM_001172660;NM_001172659;NM_001172657	57732	0	0	0.315789	0	0.155556	0.5	0	0	0.3	0.25	0.0422535	0.315789	0.157895	0.238095	0.318182	0.230769	0.315789	0.25	0.130435	0.333333
chr16.2391346	22.06	0.0106447	+	promoter	Cpg_island	ABCA17P	NR_003574	650655	0.0666667	0.333333	0	0	0.23913	0.2	NA	0.44	0.157895	0.176471	0.204819	0.186916	0.347826	0.0869565	0.6	0.619048	0.571429	0.44	0.344828	0.304348
chr16.2391402	24.1742	0.0446485	+	promoter	Cpg_island	ABCA17P	NR_003574	650655	0.6	0.4375	0.142857	NA	0.142857	0.777778	NA	NA	0.416667	0.444444	0.723404	0.884615	0.6	0.272727	0.5	0.95	0.7	0.75	1	0.578947
chr16.2391628	8.14705	0.0381561	+	promoter	Cpg_island	ABCA17P	NR_003574	650655	0	0.173913	0.1875	0	0.113636	0.133333	0	0.0526316	0.171429	0.222222	0.05	0.184466	0.183673	0.137931	0.371429	0.0833333	0.147059	0.113636	0.224138	0.163265
chr16.2392070	8.94702	0.00583739	-	promoter	Cpg_island	ABCA17P	NR_003574	650655	0	0	0.111111	0	0	0	0	0	0	0	0.0186916	0.0909091	NA	0	0	0.105263	0	0.25	0.125	0.25
chr16.2392127	17.9355	0.0487065	+	promoter	Cpg_island	ABCA3	NM_001089	21	0	0.1	0	1	0	0	0	NA	0	0	0	0.108108	0.333333	NA	0	0	0.181818	0.125	0.352941	0.333333
chr11.2399445	1.87069	0.00735812	-	promoter	Cpg_island	CD81	NM_004356	975	0	0	0	0	0	0	0	0	0	0	0	0	0.0416667	0	0	0.0285714	0	0	0.0555556	0.0294118
chr11.2400305	-21.8175	0.0474661	+	promoter	South_shore	CD81	NM_004356	975	0.296296	0.263158	0.1875	0.7	0.823529	0.3	0.289157	0.551724	0.307692	0.44	0.868421	0.673077	0.210526	0.428571	0	0	0.32	0.352941	0.392857	0.111111
chr1.2408019	18.7666	0.012126	+	utr5	North_shore	PLCH2	NM_014638	9651	1	0.636364	0.625	0.647059	0.833333	1	0.666667	0.955556	0.545455	1	0.75	1	1	1	NA	1	1	0.809524	1	0.695652
chrX.2408790	-14.9267	0.0215731	+	utr5	North_shore	ZBED1	NM_004729;NM_001171136;NM_001171135	9189	1	0.866667	0.611111	NA	0.769231	0.5	1	0.844444	0.730769	0.657143	0.901639	0.64557	0.738095	0.766667	0.666667	0.434783	0.605263	0.533333	0.806452	0.77551
chr7.2420226	-12.3703	0.0321281	-	utr3	Cpg_island	EIF3B	NM_003751;NM_001037283	8662	1	1	1	NA	1	0.875	1	1	0.785714	0.875	0.958333	0.545455	0.833333	1	1	1	0.875	0.666667	0.818182	0.727273
chr7.2420265	-9.27651	0.049482	-	utr3	Cpg_island	ZFYVE28	NM_020972;NM_001172658;NM_001172656;NM_001172657	57732	1	1	1	NA	1	1	1	1	1	0.9	1	0.545455	0.864865	0.777778	1	1	1	0.833333	1	1
chrX.2420837	-18.9907	0.0220953	-	promoter	South_shore	ZBED1	NM_004729;NM_001171136;NM_001171135	9189	0.425926	0.56	0.631579	1	0.666667	0.5	0.941176	0.5	0.380952	0.416667	0.38961	0.265957	0.313725	0.541667	0.4	0.45098	0.318182	0.5	0.451613	0.3
chr19.2425659	-19.7228	0.019045	-	utr3	Cpg_island	-	-	-	0.583333	0.25	0.466667	0.538462	0.275	0.25	1	0.25	0.142857	0.192308	0.480769	0.0227273	0.333333	0.142857	0	0.142857	0.2	0.181818	0.142857	0.52
chr19.2429469	-9.3587	0.0455797	+	promoter	North_shore	LMNB2	NM_032737	84823	1	0.875	0.724138	1	0.923077	0.8	0.769231	0.914286	0.913043	0.954545	0.840336	0.873016	0.727273	0.928571	0.736842	0.95	0.611111	0.740741	0.840909	0.757576
chr19.2429566	-17.4464	0.048037	+	promoter	North_shore	LMNB2	NM_032737	84823	NA	0.2	0.8	1	1	NA	1	NA	0.888889	1	1	0.727273	0.928571	NA	1	0.666667	0.666667	0.875	0.5	0.789474
chr19.2429567	23.2507	0.00520403	-	promoter	North_shore	LMNB2	NM_032737	84823	0.5	0.777778	NA	1	0.666667	0.8	NA	0.533333	0.615385	0.866667	0.444444	1	0.8125	0.8	1	0.882353	1	0.8	NA	1
chr11.2446142	9.6354	0.0199861	+	promoter	South_Shelf	TRPM5	NM_014555	29850	0	0.125	0	0	0	NA	NA	0	0	0	0	0.205882	0.142857	NA	0	0.225	0.111111	0	0	0
chr1.2461612	-1.76069	0.0162194	+	utr5	Cpg_island	HES5	NM_001010926	388585	0	0.0357143	0	0	0	0	0	0	0	0.0416667	0.0526316	0	0	0	0	0	0	0	0	0
chr1.2462365	13.1096	0.00926536	-	promoter	South_shore	HES5	NM_001010926	388585	0.3	0	0	0	0	0	0	0	0	0	0	0.5	0	NA	0.166667	0.0714286	0	0.142857	0	0.173913
chr1.2462374	5.49653	0.00597106	-	promoter	South_shore	HES5	NM_001010926	388585	0	0	0	0	0	0	0	0	0	0	0	0	0	NA	0.166667	0.0714286	0	0	0	0.0869565
chr11.2465505	5.0615	0.0190576	-	promoter	Cpg_island	KCNQ1	NM_000218	3784	0	0	0	0	0	0	0	0	0	0.037037	0	0.291667	0.133333	0.0588235	0	0.0555556	0.037037	0	0	0
chr19.2475340	-4.90062	0.0456451	-	promoter	Cpg_island	GADD45B	NM_015675	4616	0	0	0	NA	0	0.0714286	0	0.266667	0.15	0	0	0	0	0	0	0	0	0	0	0
chr19.2475433	-11.0566	0.0373522	-	promoter	Cpg_island	GADD45B	NM_015675	4616	0	0.125	0.142857	NA	0.0714286	0.214286	0	0.3	0.05	0	0.425532	0	0.0555556	0	0	0.2	0	0	0	0
chr19.2475483	-1.92228	0.0235883	-	promoter	Cpg_island	GADD45B	NM_015675	4616	0	0.0666667	0	0	0.0555556	NA	NA	0	0.0666667	0	0	0	0	0	0	0	0	0	0	0
chr19.2475614	7.35199	0.0489636	+	promoter	Cpg_island	GADD45B	NM_015675	4616	0.144578	0.038961	0.0526316	0	0.166667	0	0	0.05	0	0	0	0.05	0.0769231	0	0.261905	0.121212	0	0.215385	0.2	0.0325203
chr16.2478291	-12.6111	0.0325949	-	promoter	North_shore	-	-	-	0.823529	0.666667	NA	1	0.782609	NA	1	1	1	0.95	1	0.594595	0.625	0.941176	0.870968	0.777778	0.75	0.95	0.923077	0.952381
chr1.2490063	-9.66695	0.0329802	+	promoter	intercpg	TNFRSF14	NM_003820	8764	1	1	0.857143	1	0.96	0.777778	NA	1	1	1	0.941176	1	1	0.866667	0.62963	0.777778	0.823529	1	0.894737	0.894737
chr1.2490148	-7.15031	0.0421759	-	promoter	intercpg	TNFRSF14	NM_003820	8764	1	0.909091	NA	1	0.966667	0.923077	NA	1	0.88	0.921053	0.972603	0.71875	0.925926	0.9375	0.765625	0.903226	1	0.818182	0.933333	0.944444
chr19.2511570	4.61074	0.044483	+	utr3	Cpg_island	GNG7	NM_052847	2788	0	0	0	0	0	NA	0	0	0	0	0	0.173913	0	0	0	0.0666667	0	0.105263	0	0
chr19.2511714	16.4913	0.0414969	+	utr3	Cpg_island	GNG7	NM_052847	2788	0.666667	0	0.222222	0.257143	0.277778	0.111111	0	0.0322581	0	0.15	0.3125	0.397959	0.322581	0.0588235	0.37037	0.5	0.117647	0.666667	0.416667	0.214286
chr19.2512605	-45.4083	0.000614926	+	utr3	North_shore	GNG7	NM_052847	2788	NA	0.6	0.714286	NA	0.764706	0.75	0.956522	0.428571	0.944444	0.333333	1	0.5625	0.25	0.111111	0.105263	0	0.555556	0.3	0.428571	0.125
chr19.2513641	16.631	0.00844758	+	utr3	Cpg_island	GNG7	NM_052847	2788	0.425532	0.645161	0.705882	0.692308	0.72093	1	0.411765	0.8	0.65	0.857143	0.731343	0.959596	0.875	0.806452	1	0.909091	0.823529	0.875	0.666667	0.708333
chr19.2513648	-15.5567	0.018027	-	utr3	Cpg_island	GNG7	NM_052847	2788	NA	0.72	0.785714	1	0.710526	0.888889	1	0.7	0.923077	0.896552	1	0.716667	0.725	0.588235	0.764706	0.846154	0.727273	0.533333	0.785714	0.916667
chr16.2521235	-4.32976	0.0471027	-	promoter	Cpg_island	NTN3	NM_006181	4917	0	0.1	0	0.1	0	0	NA	0	0	0	0.210526	0	0	0	0	0	0	0	0	0
chr16.2521278	6.46882	0.0361011	-	promoter	Cpg_island	TBC1D24	NM_001199107;NM_020705	57465	0	0	0.0571429	0	0	0	0	0	0	0	0	0.0909091	0	0	0.333333	0.0882353	0	0	0.0666667	0
chr16.2521336	-1.12259	0.037975	+	promoter	Cpg_island	NTN3	NM_006181	4917	0	0.0540541	0	0	0.0285714	0	0.0178571	0	0	0	0	0	0	0	0	0	0	0	0	0
chr16.2521427	-4.68335	0.0338424	+	promoter	Cpg_island	NTN3	NM_006181	4917	0	0.117647	0.0555556	0	0	0	0	0	0.0512821	0	0.12931	0	0	0	0	0	0	0	0	0
chr16.2521464	3.926	0.00718146	+	promoter	Cpg_island	TBC1D24	NM_001199107;NM_020705	57465	NA	0	0	0	0	0	0	0	0	0	0	0.133333	0	0	0	0.0909091	0	0	0	0.037037
chr16.2521470	3.46126	0.0230032	+	promoter	Cpg_island	NTN3	NM_006181	4917	NA	0	0	0	0	0	0	0	0	0	0	0.2	0	0.0454545	0	0.03125	0	0	0	0
chr16.2521474	-2.39783	0.0458757	-	promoter	Cpg_island	TBC1D24	NM_001199107;NM_020705	57465	0	0	0	0	0.0833333	0.0666667	0	0	0.0384615	0.0714286	0	0	0	0	0	0	0	0	0	0
chr16.2521508	-5.6663	0.0247711	-	utr5	Cpg_island	NTN3	NM_006181	4917	0	0.133333	0.0714286	0	0.125	0.0666667	0	0.1	0	0.148148	0.111111	0	0	0.1	0.0434783	0	0	0	0	0
chr7.2550549	18.3766	0.0170786	+	promoter	intercpg	LFNG	NM_001166355	3955	0	0.30303	0.238095	NA	0.243243	0.4	0.0333333	0.0909091	0.444444	0.225806	0.329787	0.691358	0.173913	0.325	0.352941	0.481481	0.3125	0.52	0.272727	0.471698
chr7.2551554	4.56163	0.0374364	+	promoter	intercpg	LFNG	NM_001166355	3955	0.0232558	0.0175439	0.030303	0	0.0454545	0.105263	0	0.0697674	0.102564	0.0294118	0.0828729	0.117647	0.116279	0.0666667	0	0.0769231	0.0851064	0.09375	0.0697674	0.190476
chr7.2558511	-13.3998	0.013062	-	promoter	Cpg_island	LFNG	NM_001040167;NM_001166355;NM_001040168;NM_002304	3955	0	0.210526	0.142857	NA	0.333333	0.181818	NA	0.0526316	0.0588235	0.333333	0.282051	0.0333333	0	0	0	0	0	NA	0.0625	0.166667
chr7.2564858	-10.6252	0.0108338	-	promoter	North_shore	LFNG	NM_001040167;NM_001166355;NM_001040168;NM_002304	3955	1	1	1	1	1	1	1	1	0.866667	1	1	1	0.896552	1	0.636364	1	0.714286	0.8125	0.84	0.964286
chr7.2566443	-4.61479	0.0352297	+	promoter	South_shore	LFNG	NM_001040167;NM_001166355;NM_001040168;NM_002304	3955	1	1	1	1	0.942857	0.875	1	1	1	1	1	1	0.942857	0.896552	0.880952	0.875	0.9375	1	1	0.96
chr7.2566585	13.9216	0.0495996	+	promoter	South_shore	LFNG	NM_001040167;NM_001166355;NM_001040168;NM_002304	3955	1	1	1	1	0.4	1	NA	1	1	0.888889	0.333333	1	1	1	1	1	1	1	1	1
chr7.2566617	14.1867	0.0407136	-	promoter	South_shore	LFNG	NM_001040167;NM_001166355;NM_001040168;NM_002304	3955	NA	0.875	1	NA	0.6	0.6	0.695652	0.615385	0.714286	0.6875	0.7	1	0.666667	1	0.846154	0.95	1	0.4	0.666667	0.777778
chr8.2586002	-21.3521	0.0156542	+	promoter	intercpg	-	-	-	0.333333	0.361111	0.714286	0.55814	0.181818	0.142857	0.411765	0.529412	0.5	0.111111	0.538462	0.214286	0.307692	0.137931	0	0	0.35	0.518519	0.242424	0.0294118
chr8.2586034	-27.5912	0.00518071	+	promoter	intercpg	-	-	-	0.4	0.277778	0.928571	0.55814	0.255814	0.285714	0.2	0.382353	0.518519	0.185185	0.365385	0	0.307692	0.103448	0	0	0.35	0.538462	0.103448	0
chr17.2588089	-15.5881	0.0208655	-	utr3	intercpg	PAFAH1B1	NM_000430	5048	1	0.7	0.892857	1	0.833333	0.916667	0.688889	1	0.923077	0.785714	0.970149	0.611765	0.722222	0.666667	0.881356	0.5	0.965517	0.789474	0.684211	0.904762
chr17.2597936	-24.4453	0.023999	-	promoter	North_shore	KIAA0664	NM_015229	23277	1	1	1	1	0.545455	1	1	1	0.444444	1	0.948718	0.75	NA	0.833333	0.372093	0.548387	0.666667	0.384615	1	1
chr17.2615058	3.67098	0.0354846	+	promoter	Cpg_island	KIAA0664	NM_015229	23277	0	0	0	0	0	0	0	0	0	0	0	0.208955	0.0350877	0	0	0	0	0.0322581	0	0
chr20.2634462	12.1632	0.00316929	+	promoter	South_shore	SNORA51	NR_002981	677831	0	0.125	0.0625	0	0.0645161	NA	NA	0	0.166667	0	0.131579	0.163636	0.163265	0.166667	0	0.275862	0.133333	0.25	0.047619	0.333333
chr20.2634550	12.3365	0.0315382	+	promoter	South_shore	SNORD86	NR_004399	692201	0	0	0.25	0	0	NA	NA	0	0	0.157895	0.157895	0.240741	0.0625	0.111111	0	0.0689655	0.357143	0.4	0.0952381	0.166667
chr20.2634587	10.0301	0.0192523	+	promoter	South_shore	NOP56	NM_006392;NR_027700	10528	0	0.0625	0.125	0	0	NA	NA	0	0	0.0526316	0.157895	0.0909091	0.0612245	0.0555556	0	0.206897	0.333333	0.25	0.0952381	0.25
chr17.2652531	3.15599	0.0103124	+	promoter	Cpg_island	IQCE	NM_001100390;NM_152558	23288	0	0	0	0	0	0	0	0.0232558	0	0	0	0.0810811	0.0526316	0.0344828	0	0	0.0333333	0	0.0909091	0
chr17.2652562	3.17659	0.0355102	+	promoter	Cpg_island	MIR1253	NR_031654	100302208	0	0	0	0	0	0	0	0	0	0	0	0.0789474	0	0	0.1875	0	0	0.0769231	0	0
chr18.2655929	2.23405	0.0307196	-	promoter	Cpg_island	LOC645158	NR_033754	645158	0	0	0	0	0	0	0	0	0	0	0	0.117647	0.03125	0	0	0.0263158	0	0	0	0
chr7.2671057	8.5907	0.0128215	+	promoter	North_shore	TTYH3	NM_025250	80727	0	0.108108	0.333333	0.133333	0.222222	0.333333	NA	0.114286	0.107143	0.2	0.107143	0.195652	0.255814	0.194444	0.235294	0.16	0.208333	0.181818	0.166667	0.388889
chr7.2671183	1.12485	0.0328764	+	promoter	Cpg_island	TTYH3	NM_025250	80727	0	0	0	0	0	0	0	0	0	0	0	0.0458716	0	0.015873	0	0	0	0.0322581	0	0
chr7.2671731	2.59592	0.02693	+	utr5	Cpg_island	TTYH3	NM_025250	80727	0	0	0	NA	0	0	0	0	0	0	0	0.1	0	0	0	0.0540541	0	0	0.05	0
chr20.2672039	10.5411	0.0410892	+	promoter	North_shore	EBF4	NM_001110514	57593	0.769231	0.857143	0.818182	1	1	1	0.333333	0.875	1	0.818182	1	1	0.857143	1	1	1	1	1	1	1
chr20.2672918	4.13421	0.00667672	+	promoter	Cpg_island	EBF4	NM_001110514	57593	0.0227273	0	0	0	0	0	0	0	0.0185185	0	0	0.019802	0.0344828	0.05	0.170732	0	0.105263	0	0.1	0
chr20.2672933	2.67298	0.0237573	-	promoter	Cpg_island	EBF4	NM_001110514	57593	0	0	0	0	0	0	NA	0	0	0.0588235	0	0.05	0.0263158	0	0	0	0	0.105263	0.0645161	0
chr20.2673001	2.87603	0.0300036	-	promoter	Cpg_island	EBF4	NM_001110514	57593	0	0	0	0	0	0	NA	0	0	0	0	0.1	0	0	0	0.0952381	0	0.0526316	0	0
chr20.2673003	1.31297	0.0228137	+	promoter	Cpg_island	EBF4	NM_001110514	57593	0	0	0	0	0	0	0	0	0	0	0.00546448	0.019802	0.0344828	0.05	0	0	0	0	0	0
chr20.2673010	6.25205	0.00430311	-	promoter	Cpg_island	EBF4	NM_001110514	57593	0	0	0	0	0.0526316	0	NA	0	0	0	0	0.15	0.0263158	0	0	0.142857	0.176471	0.0526316	0.0645161	0
chr7.2701604	-9.45302	0.0263178	-	utr3	Cpg_island	TTYH3	NM_025250	80727	1	1	NA	1	0.933333	NA	1	1	NA	0.833333	1	0.870968	0.972222	0.857143	0.722222	0.833333	0.833333	NA	1	1
chr7.2701683	-6.12011	0.0293073	-	utr3	Cpg_island	TTYH3	NM_025250	80727	1	1	1	1	1	1	1	1	0.957447	0.931034	1	0.835616	1	0.833333	1	0.970588	0.769231	1	0.880952	0.983871
chr1.2706404	3.27103	0.0215152	-	promoter	Cpg_island	-	-	-	0	0	0	NA	0	0	NA	0	0.0454545	0	0	0.047619	0	0	0	0	0	0.0714286	0	0.0714286
chr1.2706411	5.13031	0.0270446	+	promoter	Cpg_island	-	-	-	0	0	0	0	0.015873	0	0	0	0	0	0	0.2875	0.0540541	0.030303	0.075	0	0	0	0.0344828	0
chr1.2706414	2.82109	0.0185212	+	promoter	Cpg_island	-	-	-	0	0	0	0	0	0	0	0	0	0	0	0	0.0333333	0.157895	0	0	0.0416667	0	0.0588235	0
chr1.2706496	-4.7487	0.00247725	-	promoter	Cpg_island	-	-	-	0	0.047619	0	NA	0.0540541	0.181818	0	0.0526316	0.03125	0	0.0933333	0	0	0	0	0	0	0	0	0
chr1.2706510	3.05624	0.0370814	-	promoter	Cpg_island	-	-	-	0	0	0	NA	0	0	0	0	0	0	0	0	0	0.0526316	0	0.0434783	0	0	0.2	0
chr1.2706513	1.77997	0.0410679	+	promoter	Cpg_island	-	-	-	0	0	0	0	0	0	0	0	0	0	0	0	0.0666667	0	0	0	0	0.0769231	0.0555556	0
chr1.2706724	3.10046	0.0143443	-	promoter	Cpg_island	-	-	-	0	0	0	NA	0	0	0	0	0	0	0	NA	0.0344828	0	0	0	0	0	0.0909091	0.0869565
chr1.2706841	10.9973	0.0161706	-	promoter	Cpg_island	-	-	-	NA	0	0	NA	0	0	NA	0	0	0.142857	0	0.243243	0.28	0.125	0	0.0967742	0	0.0666667	0.04	0.1875
chr1.2706855	6.91073	0.0442595	+	promoter	Cpg_island	-	-	-	0	0.125	0	0	0	0.0666667	0	0	0	0	0.0853659	0.175439	0.0238095	0	0.169492	0.04	0	0.176471	0.0625	0.153846
chr1.2706952	-22.0096	0.0145394	+	promoter	Cpg_island	-	-	-	1	0.625	0.666667	1	0.711111	0.4	0.7	1	0.6	0.571429	0.560976	0.45614	0.380952	0.5	0.525424	0.72	0.567568	0.647059	0.375	0.461538
chr7.2719199	24.4247	0.0329081	+	utr5	South_shore	AMZ1	NM_133463	155185	0.709091	0.333333	1	0	0.472222	0.555556	0.535714	0.3	0.666667	0.375	0.729167	0.942857	0.7	1	1	0.814815	0.6875	0.454545	0.666667	0.580645
chr7.2719205	24.9972	0.00974565	+	utr5	South_shore	AMZ1	NM_133463	155185	0.563636	0.238095	0.181818	0	0.361111	0.333333	0.25	0.7	0.5	0.294118	0.4375	0.628571	0.625	0.5	1	0.518519	0.5	0.666667	0.625	0.40625
chr16.2731887	26.6886	0.00231479	-	promoter	North_shore	KCTD5	NM_018992	54442	0	0.153846	0.285714	NA	0.15	0.294118	NA	0.325581	0.3125	0.5	0.245455	0.607143	0.166667	0.307692	0.882353	0.534884	0.65625	0.428571	0.545455	0.421053
chr16.2731897	19.7308	0.0136223	-	promoter	North_shore	KCTD5	NM_018992	54442	0	0.307692	0.285714	NA	0.1	0.444444	NA	0.0909091	0.111111	0.4	0.410714	0.5	0.333333	0.375	0.647059	0.627907	0.5	0.285714	0.266667	0.329114
chr16.2731932	14.0871	0.0135217	-	promoter	North_shore	KCTD5	NM_018992	54442	NA	0	0	NA	0.1	0	NA	0	0	0.222222	0	0.173913	0	0.285714	0.352941	0.222222	0.2	0.2	0.142857	0
chr19.2732612	-20.8529	0.0112325	+	utr3	North_shore	SLC39A3	NM_144564	29985	0.863636	0.464286	0.481481	0.790698	0.551724	0.533333	1	0.756757	0.571429	0.333333	0.4	0.357895	0.189189	0.421053	0.357143	0.5	0.409091	0.368421	0.461538	0.583333
chr5.2750526	2.47582	0.0331965	-	promoter	Cpg_island	C5orf38	NM_178569	153571	0	0	0	0	0	0	0	0	0	0.0357143	0	0.04	0	0.0666667	0.0789474	0	0	0	0	0
chr5.2750528	5.49035	0.0305752	-	promoter	Cpg_island	C5orf38	NM_178569	153571	0	0	0.111111	0	0	0.111111	0	0	0	0	0	0.04	0	0.0666667	0.210526	0.0444444	0	0	0	0.117647
chr5.2750571	2.22283	0.040972	-	promoter	Cpg_island	C5orf38	NM_178569	153571	0	0	0	0	0	0	0	0	0	0	0	0.04	0	0	0	0.0888889	0	0	0	0
chr5.2750630	1.73109	0.0132891	+	promoter	Cpg_island	IRX2	NM_001134222;NM_033267	153572	0	0	0	NA	0	0	NA	0	0	0	0	0.0206186	0.030303	0	0	0.0208333	0	0	0.0714286	0
chr5.2750840	4.60718	0.0117508	+	promoter	Cpg_island	C5orf38	NM_178569	153571	0	0	0	0	0	0	0	0	0	0	0	0.05	0	0.0689655	0.266667	0	0	0	0.027027	0
chr5.2750845	3.78793	0.00834898	+	promoter	Cpg_island	IRX2	NM_001134222;NM_033267	153572	0	0	0	0	0	0	0	0	0	0	0	0.05	0.125	0	0	0	0	0	0.0540541	0.136364
chr5.2750846	1.85699	0.0202229	-	promoter	Cpg_island	C5orf38	NM_178569	153571	0	0	0	0	0	0	0	0	0	0	0	0.0597015	0	0.0416667	0	0	0	0	0.0384615	0.0222222
chr5.2752386	3.64688	0.026112	+	promoter	Cpg_island	IRX2	NM_001134222;NM_033267	153572	0	0	0	0	0	0	0	0	0	0	0	0.0829876	0	0	0.123288	0	0.027027	0	0	0
chr5.2752443	2.45505	0.0120778	+	promoter	Cpg_island	C5orf38	NM_178569	153571	0	0	0	0	0	0	0	0	0	0	0	0.0689655	0	0.0333333	0	0	0	0.0222222	0	0.0833333
chr5.2752466	1.33953	0.0314358	+	promoter	Cpg_island	C5orf38	NM_178569	153571	0	0	0	0	0	0	0	0	0	0	0	0.025641	0.027027	0	0	0	0	0	0.0625	0
chr5.2752486	1.36853	0.0324639	+	promoter	Cpg_island	C5orf38	NM_178569	153571	0	0	0	0	0	0	0	0	0	0	0	0.0263158	0	0.0416667	0	0	0	0.0555556	0	0
chr5.2752556	6.83606	0.0440178	+	promoter	Cpg_island	C5orf38	NM_178569	153571	0	0	0.272727	0	0	0	NA	0	0	0.0769231	0	0.145161	0.2	0.047619	0	0	0.111111	0	0.25	0.05
chr7.2753021	-20.287	0.00565137	+	utr3	intercpg	AMZ1	NM_133463	155185	1	0.648649	1	NA	0.9	0.888889	0.8	0.961538	0.75	0.818182	0.909091	0.686275	0.592593	0.6	0.583333	0.558824	NA	0.882353	1	0.689655
chr6.2763959	-19.2116	0.0468364	-	promoter	North_shore	WRNIP1	NM_130395;NM_020135	56897	1	1	1	1	1	0.857143	NA	0.4	0.888889	0.555556	1	0.416667	0.636364	0.714286	1	0.8125	0.6	0.666667	1	0.578947
chr7.2768548	-15.9636	0.0230658	+	utr3	intercpg	GNA12	NM_007353	2768	1	0.75	0.833333	NA	NA	1	1	NA	0.636364	0.923077	0.979167	0.714286	0.727273	1	0.636364	0.714286	NA	0.666667	0.8	0.923077
chr7.2768563	-18.9087	0.0195812	+	utr3	intercpg	GNA12	NM_007353	2768	1	0.875	0.833333	NA	NA	1	1	NA	0.545455	0.846154	0.979167	0.714286	0.727273	1	0.636364	0.535714	NA	0.666667	0.8	0.846154
chr7.2768902	-24.4785	0.0158868	+	utr3	intercpg	GNA12	NM_007353	2768	0.875	1	1	NA	1	0.8	1	0.714286	0.428571	NA	1	0.709091	0.888889	0.666667	0.5	0.5	0.8125	NA	0.888889	0.166667
chr7.2768952	-15.8493	0.0475144	-	utr3	intercpg	GNA12	NM_007353	2768	0	0.923077	1	NA	0.84375	0.777778	1	0.6875	0.651163	0.777778	0.921053	0.740741	0.533333	0.928571	0.62069	0.5	0.761905	0.458333	0.5	0.764706
chr16.2770901	-4.69721	0.0059881	+	promoter	North_shore	PRSS27	NM_031948	83886	NA	0.16	0.111111	0	0.102564	0	0	0.0625	0	0.0344828	0	0	0	0	0	0	0	0	0	0
chr16.2771014	1.56605	0.0485773	-	promoter	North_shore	PRSS27	NM_031948	83886	0	0	0	0	0	0	0	0	0	0	0	0.0645161	0	0	0	0	0	0	0	0.0526316
chr16.2771838	3.06355	0.0137961	+	promoter	South_shore	PRSS27	NM_031948	83886	0	0	0	0	0.025641	0	0	0	0	0	0	0.0972222	0	0	0.0215054	0.0540541	0	0	0.0333333	0.0285714
chr19.2784836	19.7241	0.0397851	-	promoter	North_shore	THOP1	NM_003249	7064	0.4	0.833333	0.142857	1	1	0.428571	1	0.466667	0.714286	0.909091	0.705882	1	0.826087	0.833333	1	1	0.6	1	1	1
chr12.2800518	6.09531	0.0354449	-	promoter	Cpg_island	CACNA1C	NM_001129831;NM_001129839;NM_001167624;NM_001129829;NM_001129841;NM_001129833;NM_001129834;NM_000719;NM_001129843;NM_001167625;NM_001129844;NM_001167623;NM_001129837;NM_001129846;NM_001129838;NM_001129830;NM_001129840;NM_001129832;NM_001129842;NM_001129835;NM_001129827;NM_001129836;NM_199460	775	0	0.0526316	0.0344828	0	0.0338983	0	0	0	0.0882353	0.0384615	0.0461538	0.0792079	0.15	0.176471	0.0638298	0	0.0555556	0.15625	0	0.288462
chr12.2800870	-6.80265	0.0149808	+	promoter	Cpg_island	CACNA1C	NM_001129831;NM_001129839;NM_001167624;NM_001129829;NM_001129841;NM_001129833;NM_001129834;NM_000719;NM_001129843;NM_001167625;NM_001129844;NM_001167623;NM_001129837;NM_001129846;NM_001129838;NM_001129830;NM_001129840;NM_001129832;NM_001129842;NM_001129835;NM_001129827;NM_001129836;NM_199460	775	0	0.125	0.125	0	0.129032	0.142857	NA	0	0.109091	0	0.0946502	0	0	0	0	0	0.1	0	0	0
chr16.2806359	16.8504	0.0327193	+	utr5	Cpg_island	SRRM2	NM_016333	23524	1	0.888889	0.8	0.782609	0.969697	0.875	0.428571	0.652174	0.25	0.7	0.83871	1	0.538462	1	1	0.933333	0.857143	NA	1	0.945946
chr19.2813392	15.6673	0.0459149	+	utr3	South_shore	THOP1	NM_003249	7064	0.714286	0.666667	0.529412	0.454545	0.40625	0.666667	0	0.6	0.666667	0.625	0.6	NA	0.6	0.8	0.745455	0.818182	0.555556	0.818182	0.4375	0.733333
chr19.2813428	9.00635	0.00077511	+	utr3	South_shore	THOP1	NM_003249	7064	0	0	0	0	0	0	0	0	0	0	0	NA	0	0.166667	0.166667	0.153846	0	0	0.0588235	0
chr4.2814001	2.0532	0.045725	+	utr5	intercpg	SH3BP2	NM_001122681;NM_001145855	6452	0	0	NA	0	0	0	0	0	0	0	0	0	0.0192308	0	0	0	0.0909091	0.111111	0	0
chr4.2820390	-2.99112	0.010797	-	promoter	Cpg_island	SH3BP2	NM_003023;NM_001122681;NM_001145856;NM_001145855	6452	0	0	0	NA	0.0344828	0	NA	0	0	0.0769231	0.047619	0	0	0	0	0	0	0	0	0
chr20.2822492	16.764	0.0187113	+	promoter	South_shore	VPS16	NM_022575;NM_080413	64601	NA	0.625	1	0.448276	0.789474	0.8	0.285714	0.8	0.826087	0.777778	0.833333	0.962264	0.777778	0.733333	1	0.769231	1	0.857143	0.85	1
chr20.2822557	-7.25763	0.013878	-	promoter	South_shore	VPS16	NM_022575;NM_080413	64601	1	0.857143	0.944444	1	1	1	1	NA	0.875	1	1	0.878788	1	0.8	0.85	0.909091	0.833333	1	1	0.96
chr19.2841219	5.1817	0.0332788	+	promoter	Cpg_island	ZNF555	NM_001172775;NM_152791	148254	0	0	0	0	0	0	0	0	0	0	0	0.282609	0	0	0	0.0322581	0.130435	0	0	0
chr18.2846703	1.96113	0.0265704	+	promoter	Cpg_island	EMILIN2	NM_032048	84034	0	0	0	0	0	0	0	0	0	0	0	0.0612245	0	0	0	0	0	0.0769231	0	0.0447761
chrX.2847442	2.10631	0.0447333	-	promoter	Cpg_island	ARSD	NM_001669;NM_009589	414	0	0	0	0	0	0	0	0	0	0	0	0.075	0.0625	0	0	0	0	0	NA	0
chrX.2847550	5.55855	0.00379607	-	promoter	South_shore	ARSD	NM_001669;NM_009589	414	0	0	0	0	0	0	0	0	0.0294118	0.03125	0	0.134831	0.0769231	NA	0.102941	0	0	0	0	0.0338983
chr16.2879529	17.5423	0.0472767	+	promoter	intercpg	ZG16B	NM_145252	124220	0.571429	0.576923	0.65	NA	0.428571	0.571429	0.111111	0.818182	0.714286	0.681818	0.782353	0.769231	0.941176	0.571429	0.916667	0.782609	0.4	0.777778	0.833333	0.952381
chr16.2879569	-12.871	0.0252717	+	promoter	intercpg	ZG16B	NM_145252	124220	1	0.714286	0.8	NA	0.753086	0.785714	0.777778	0.860465	0.76	0.97561	0.979228	0.782051	0.8125	0.692308	0.833333	0.857143	0.736842	0.411765	0.741935	0.658537
chr16.2879577	-14.0708	0.0456409	+	promoter	intercpg	ZG16B	NM_145252	124220	0.571429	0.76	0.6	NA	0.97619	0.785714	0.611111	0.909091	0.785714	0.863636	0.888235	0.805195	0.764706	0.333333	0.833333	0.75	0.6	0.444444	0.666667	0.619048
chr19.2899543	10.1039	0.0476469	-	promoter	North_shore	ZNF57	NM_173480	126295	1	0.846154	0.428571	1	0.913043	0.888889	NA	0.75	0.625	0.941176	0.865385	1	0.918919	1	1	1	0.947368	0.777778	1	NA
chr19.2899707	6.83816	0.0117471	+	promoter	North_shore	ZNF57	NM_173480	126295	1	1	1	NA	0.976744	NA	0.882353	0.8	0.875	0.909091	1	1	1	1	1	1	1	NA	1	1
chr19.2899724	13.9959	0.00483896	+	promoter	North_shore	ZNF57	NM_173480	126295	1	0.818182	1	NA	0.975	NA	1	0.625	0.875	0.909091	0.674419	1	1	1	1	1	1	NA	1	1
chr16.2902928	9.36197	0.0370606	+	utr3	Cpg_island	PRSS22	NM_022119	64063	0.111111	0.3	0.0833333	0	0	NA	0.142857	NA	0.25	0.181818	0.0540541	0.259259	0.192308	0	0.151515	0.318182	0.285714	0.0769231	0.227273	0.111111
chr16.2902929	12.5915	0.0194102	-	utr3	Cpg_island	PRSS22	NM_022119	64063	0	0.2	0.111111	0	0.0588235	NA	0.411765	NA	0.142857	0.111111	0.134615	0.196721	0.151515	0.411765	0.342857	0.454545	0.461538	0.1875	0.192308	0.147059
chr16.2902962	14.0355	0.0367811	+	utr3	Cpg_island	PRSS22	NM_022119	64063	0	0.380952	0.266667	0.111111	0.2	NA	0.142857	0	0.227273	0.25	0.157143	0.512195	0.157895	0	0.243902	0.518519	0.26087	0.421053	0.346154	0.3
chr16.2902966	2.5106	0.0494309	+	utr3	Cpg_island	PRSS22	NM_022119	64063	0	0	0	0	0	NA	0	0	0.0434783	0	0	0.0487805	0.025	0	0	0	0.08	0	0	0.0882353
chr12.2903455	15.9413	0.0319902	-	promoter	Cpg_island	FKBP4	NM_002014	2288	0	0.272727	0.285714	0	0	0.181818	NA	0	0.222222	0.26087	0.0175439	0.521739	0.166667	0.1875	0.375	0.0588235	0.272727	0.05	0.384615	0.363636
chr12.2903464	22.7263	0.0196214	-	promoter	Cpg_island	FKBP4	NM_002014	2288	0	0.3	0.571429	0	0.1875	0.272727	NA	0.642857	0.125	0.391304	0.0178571	0.521739	0.413793	0.214286	0.5625	0.529412	0.636364	0.25	0.384615	0.454545
chr12.2903507	15.746	0.0352492	-	promoter	Cpg_island	FKBP4	NM_002014	2288	0	0	0	0	0	0.181818	NA	0	0.111111	0.318182	0	0.371429	0.333333	0.0625	0	0.0588235	0.545455	0.35	0.166667	0
chr12.2903748	10.3854	0.00766084	-	promoter	Cpg_island	FKBP4	NM_002014	2288	0	0	0	0	0	0	0	0	NA	0	0.0588235	0.274194	0	0.1	0	0	0.111111	0.181818	0.0909091	0.25
chr12.2903795	7.36835	0.0143989	-	promoter	Cpg_island	FKBP4	NM_002014	2288	0	0	0	0	0	0	0	0	NA	0	0	0.246154	0.0434783	0	0	0	0	0.04	0.176471	0
chr11.2908945	20.3891	0.0218253	-	promoter	South_shore	CDKN1C	NM_001122631;NM_001122630;NM_000076	1028	0.0625	0.461538	0.375	0.548387	0.548387	NA	0	0.333333	0.5	0.4375	0.636364	0.670886	0.586207	0.5625	0.7	0.347826	0.6	0.75	0.619048	0.576923
chr11.2925474	-22.5611	0.0150614	-	promoter	South_shore	SLC22A18	NM_183233;NM_002555	5002	1	0.586207	0.833333	1	0.675	0.25	0.68	0.809524	0.689655	0.583333	0.62	0.338235	0.638889	0.526316	NA	0.5	0.636364	0.230769	0.466667	0.638889
chr11.2925478	-20.5731	0.0337111	-	promoter	South_shore	SLC22A18	NM_183233;NM_002555	5002	0.961538	0.62069	0.75	1	0.675	0.416667	1	0.318182	0.758621	0.666667	0.66	0.449275	0.666667	0.631579	NA	0.611111	0.727273	0.307692	0.488889	0.405405
chr1.2938149	-21.0239	0.0403823	+	utr5	North_shore	ACTRT2	NM_080431	140625	1	0.782609	0.461538	NA	0.8	0.818182	NA	0.583333	0.8	0.875	0.96	0.689655	0.740741	0.625	0.461538	0	0.25	0.615385	1	0.741935
chr1.2938246	-18.2106	0.00625709	+	utr5	North_shore	ACTRT2	NM_080431	140625	1	0.954545	0.692308	NA	0.933333	0.909091	NA	1	1	0.75	0.96	0.703704	0.592593	1	0.461538	1	0.875	0.769231	0.857143	0.7
chr17.2938882	17.7695	0.041309	+	utr3	intercpg	RAP1GAP2	NM_001100398;NM_015085	23108	0.181818	0.789474	0.6	0	0.727273	0.5	0.794118	0.8125	0.8	0.428571	0.666667	0.887097	0.8	0.866667	0.695652	0.606061	0.791667	0.882353	0.923077	0.631579
chr11.2950827	2.36667	0.0323631	+	promoter	Cpg_island	PHLDA2	NM_003311	7262	0	0	0	0	0.0172414	0	0	0	0	0	0	0	0	0.0555556	0	0.0263158	0.0384615	0.136364	0	0
chr6.2964229	-12.2996	0.00393575	-	promoter	intercpg	SERPINB6	NM_001195291;NM_004568	5269	1	1	0.666667	1	0.869565	0.933333	0.866667	0.921053	0.892857	0.9	0.944444	0.84	0.818182	0.703704	0.705882	0.882353	0.882353	0.631579	0.785714	0.842105
chr4.2964839	1.55122	0.0361939	-	promoter	Cpg_island	GRK4	NM_001004056;NM_182982;NM_001004057	2868	0	0	0	0	0	0	0	0	0	0	0	0.0683761	0.0285714	0	0	0	0.0208333	0	0	0
chr4.2965775	1.79888	0.0136758	-	promoter	Cpg_island	GRK4	NM_001004056;NM_182982;NM_001004057	2868	0	0	0	0	0	0	0	0	0	0	0	0.0588235	0	0.0277778	0	0	0.025641	0	0.0384615	0
chr6.2971390	2.9646	0.0237461	+	promoter	Cpg_island	SERPINB6	NM_001195291;NM_004568	5269	0	0	0	0	0	0	0	0	0	0	0	0.0454545	0	NA	0.117647	0	0	0	0	0
chr19.2977116	-1.38196	0.0300884	-	promoter	North_shore	TLE6	NM_024760;NM_001143986	79816	0	0	0	0	0.0243902	0	0	0	0	0.0243902	0.046875	0	0	0	0	0	0	0	0	0
chr16.2979683	-18.1935	0.00536164	+	utr5	intercpg	FLYWCH1	NM_032296;NM_020912	84256	1	0.708333	0.454545	0.944444	0.933333	1	1	0.861111	0.931034	0.947368	0.964286	0.745763	0.625	0.863636	0.628571	0.6875	0.695652	0.571429	0.76	0.865385
chr1.2984525	14.6903	0.036376	+	promoter	Cpg_island	PRDM16	NM_199454;NM_022114	63976	0	0	0.0625	0	0	0.333333	0	0	0.1	0	0.0714286	0.146341	0	0.1875	0.583333	0.291667	0	0	0.0769231	0.6
chr1.2985136	3.27752	0.00927511	-	promoter	Cpg_island	FLJ42875	NR_024371;NR_015440	440556	0	0	0	0	0	0	0	NA	0	0	0	0.0810811	0	0	0.037037	0.0526316	NA	0	0	0
chr12.2986101	0.713255	0.0277026	-	utr5	Cpg_island	C12orf32	NR_027363;NR_027364;NR_027365	83695	0	0	0	0	0	0	0	0	0	0	0	0.025	0	0	0	0	0	0.0204082	0.0217391	0
chr19.2995029	14.7266	0.0226116	+	utr3	intercpg	TLE6	NM_024760;NM_001143986	79816	0.272727	0.0909091	0.272727	0	0.111111	0	0	0.0384615	0	0.1875	0	0.521127	0.3	0.181818	0.333333	0.150943	0.0434783	0.136364	0.166667	0.0909091
chr16.3012851	10.5341	0.0167682	+	promoter	North_shore	KREMEN2	NM_024507;NM_172229	79412	0	0.117647	0	NA	0.106796	0.0666667	0	0	0.04	0.0277778	0.0447761	0.301587	0.181818	0.0909091	0.3125	0.328125	0.107143	0.0930233	0.0909091	0
chr16.3012854	6.14028	0.0431264	+	promoter	North_shore	KREMEN2	NM_024507;NM_172229	79412	0	0.0352941	0.25	NA	0.0291262	0	0	0.084507	0	0	0	0.190476	0	0.0363636	0.28125	0.03125	0.0238095	0.139535	0.0454545	0.0952381
chr18.3012863	1.11166	0.0497756	-	promoter	Cpg_island	LPIN2	NM_014646	9663	0	0	NA	NA	0	0	NA	0	0	0	0	0.0333333	0	0	0.0307692	0	0	0	0	0
chr18.3012884	1.11963	0.0492517	-	promoter	Cpg_island	LPIN2	NM_014646	9663	0	0	NA	NA	0	0	NA	0	0	0	0	0.0333333	0	0	0.0307692	0	0	0	0	0
chr18.3012887	1.11561	0.0495136	-	promoter	Cpg_island	LPIN2	NM_014646	9663	0	0	NA	NA	0	0	NA	0	0	0	0	0.0333333	0	0	0.0307692	0	0	0	0	0
chr18.3012892	1.11561	0.0495136	-	promoter	Cpg_island	LPIN2	NM_014646	9663	0	0	NA	NA	0	0	NA	0	0	0	0	0.0333333	0	0	0.0307692	0	0	0	0	0
chr18.3012904	1.11166	0.0497756	-	promoter	Cpg_island	LPIN2	NM_014646	9663	0	0	NA	NA	0	0	NA	0	0	0	0	0.0333333	0	0	0.0307692	0	0	0	0	0
chr18.3012906	1.11166	0.0497756	-	promoter	Cpg_island	LPIN2	NM_014646	9663	0	0	NA	NA	0	0	NA	0	0	0	0	0.0333333	0	0	0.0307692	0	0	0	0	0
chr16.3013287	-7.22068	0.0426664	+	promoter	North_shore	KREMEN2	NM_024507;NM_172229	79412	0	0	NA	0.346154	0	0	NA	0	0	0.117647	0.113636	0	0	0	0	0	NA	0	0	0
chr18.3013306	5.33505	0.0291345	+	promoter	South_shore	LPIN2	NM_014646	9663	0	0	0	0	0	0	NA	0	0	0	0	0.113636	0	0	0.0909091	0.212766	0	0	0	0
chr16.3018709	16.8307	0.00995491	-	promoter	Cpg_island	PAQR4	NM_152341	124222	0.0909091	0.1	0	0	0	0	0.386364	0.111111	0.0833333	0.2	0.0588235	0.166667	0.269231	0.166667	0.238095	0.5	0.266667	0.214286	0.0666667	0.555556
chr16.3018730	16.6336	0.04575	-	promoter	Cpg_island	PAQR4	NM_152341	124222	0	0.047619	0.285714	0	0.0714286	0	0.25	0.555556	0.04	0.0666667	0	0.047619	0.258065	0.142857	0.142857	0.818182	0	0.214286	0.294118	0.666667
chr16.3019837	2.32528	0.0363442	-	utr5	Cpg_island	PAQR4	NM_152341	124222	0	0	NA	0	0	NA	NA	0	0	0	0	0.0416667	0.0232558	0	0	0	0	0	0	0.1
chr19.3028746	-3.05342	0.0333437	+	utr5	Cpg_island	TLE2	NM_003260;NM_001144761;NM_001144762	7089	0	0.125	0	0	0	0	NA	0.0666667	0	0.0769231	0	0	0	0	0	0	NA	0	0	0
chr19.3048808	-16.4079	0.0253093	+	promoter	South_shore	TLE2	NM_001144761	7089	0.612903	0.68	0.846154	NA	0.704918	1	0.90625	1	0.882353	0.75	0.888889	0.596774	0.6875	0.793103	0.454545	0.805556	0.619048	0.827586	0.75	0
chr19.3053687	-19.4904	0.0267342	-	utr3	intercpg	AES	NM_198970;NM_198969;NM_001130	166	0.976744	0.555556	1	1	0.913043	0.909091	NA	0.954545	0.333333	0.619048	1	0.636364	1	0.583333	0.727273	0.625	0.555556	0.833333	0.875	0.518519
chr19.3053807	-23.9326	0.00166801	+	utr3	intercpg	AES	NM_198970;NM_198969;NM_001130	166	1	0.571429	0.708333	0.789474	0.933333	0.5	0.6	0.833333	0.857143	0.724138	0.964286	0.725	0.657143	0.4375	0.507042	0.48	0.416667	0.388889	0.607143	0.607143
chr20.3063264	23.0411	0.00599354	+	utr3	Cpg_island	AVP	NM_000490	551	0.571429	0	0.0833333	0	0.1	0.125	0.0769231	0.0714286	0.25	0.5	0.170213	0.08	0.428571	0.25	0.5	0.2	0.5	0.5	0.6	0.538462
chr19.3063286	-9.46684	0.0251366	+	promoter	South_shore	AES	NM_198970;NM_198969;NM_001130	166	0.32	0.0416667	0.117647	0.185185	0.192308	NA	NA	0.352941	0.0769231	0.030303	0.214286	0.0361446	0.08	0.111111	0.0352941	0.0392157	0.047619	0	0.0555556	0.28125
chr19.3064841	18.7034	0.0169858	+	promoter	South_Shelf	AES	NM_198970;NM_198969;NM_001130	166	NA	0.266667	0.266667	0	0	0	0	0	0	0.227273	0	0.575758	0.0930233	0.166667	0.344262	0.21875	0.0625	0.0555556	0.25	NA
chr16.3068180	2.15819	0.0476836	+	utr5	Cpg_island	CLDN6	NM_021195	9074	0	0.0322581	0	0	0	0.04	0	0	0	0.0175439	0	0.0240964	0.0327869	0.151515	0	0	0.0333333	0	0.0465116	0.00961539
chr16.3068222	-1.78356	0.0418321	-	promoter	Cpg_island	TNFRSF12A	NM_016639	51330	0	0	0	0	0.0571429	0	NA	0	0.0909091	0.0666667	0	0	0	0	0	0	0	0	0	0
chr16.3069930	12.5743	0.047867	+	promoter	North_shore	THOC6	NM_024339;NM_001142350	79228	0	0.18	0.277778	0.140625	0.294643	0.176471	0	0	0.230769	0.25	0.160494	0.346154	0.45098	0.27907	0.102564	0.430108	0.170213	0.176471	0.416667	0.119403
chr16.3069959	4.87631	0.0396737	-	promoter	North_shore	TNFRSF12A	NM_016639	51330	0	0	0	0	0	0	0	NA	0.0714286	0	0	0	0.157895	0	0	0.190476	0.0769231	0.0952381	0.0344828	0
chr16.3069961	4.48815	0.0178046	+	promoter	North_shore	TNFRSF12A	NM_016639	51330	0	0.0322581	0	0	0.0588235	0	NA	0.0689655	0	0	0.0232558	0.0571429	0.0444444	0.121212	0	0.1	0.0322581	0.0833333	0	0.130435
chr11.3078798	5.04653	0.0293354	-	promoter	Cpg_island	CARS	NM_139273;NM_001014437;NM_001751;NM_001194997;NR_036542	833	0	0	0	0	0	0	0	0	0	0	0	0.25641	0.111111	0	0	0	0.0666667	0	0	0
chr7.3084078	-10.0578	0.0289768	-	promoter	intercpg	CARD11	NM_032415	84433	1	0.741935	0.7	1	0.802469	0.818182	1	0.875	0.763158	0.811321	0.893491	0.774436	0.895833	0.767442	0.573529	0.795455	0.714286	0.71875	0.818182	0.772727
chr16.3086494	13.5959	0.00195784	-	promoter	Cpg_island	CCDC64B	NM_001103175	146439	0	0	0	0	0.0555556	0	0	0	0.0952381	0.153846	0	0.04	0.5	0.25	0.142857	0.178571	0.363636	0.142857	0	0.0967742
chr16.3086567	2.44753	0.00530491	+	promoter	Cpg_island	CCDC64B	NM_001103175	146439	0	0	0	0	0	0	0	0	0	0	0	0.0434783	0.0833333	0	0.0487805	0	0	0	0	0.037037
chr16.3086568	4.74366	0.0124339	-	promoter	Cpg_island	HTT	NM_002111	3064	0	0	0	0	0	0	0	0	0.0645161	0	0	0.0645161	0.0952381	0	0.0645161	0	0.05	0	0.2	0
chr16.3086953	5.61987	0.0165805	+	promoter	Cpg_island	CCDC64B	NM_001103175	146439	0	0	0	0	0.0606061	0	0	0	0	0	0.00934579	0.0833333	0.222222	0	0.175	0	0.0333333	0	0.117647	0
chr16.3086989	-15.5015	0.00229195	-	promoter	South_shore	-	-	-	0.304348	0.277778	0.1	NA	0.254237	0.166667	0.190476	0.272727	0.156863	0.206897	0.358974	0.2	0.166667	0.0952381	0.030303	0	0.275862	0	0.0444444	0
chr16.3087056	-4.40544	0.0316189	-	promoter	South_shore	CCDC64B	NM_001103175	146439	0	0.111111	0.027027	NA	0.129032	0	NA	0	0	0.0588235	0	0	0	0.125	0	0	0	0	0	0
chr19.3094581	3.64859	0.0317565	+	utr5	North_shore	GNA11	NM_002067	2767	0	0	0	0	0	0	0	0	0	0.0714286	0	0.105263	0	0	0.0689655	0	0	NA	0	0
chr16.3095128	-18.7263	0.0044353	-	promoter	North_shore	MMP25	NM_022468	64386	1	0.809524	1	0.8125	0.825	0.714286	1	0.71875	0.4	0.935484	0.952381	0.72807	0.615385	0.722222	0.770833	0.653846	0.625	0.888889	0.709677	0.612903
chr16.3096372	1.66756	0.0308627	-	promoter	Cpg_island	MMP25	NM_022468	64386	0	0	0	0	0	0	0	0	0	0	0	0.0176991	0.153846	0.0625	0	0	0	0	0	0
chr16.3096663	5.27731	0.0122496	-	promoter	Cpg_island	MMP25	NM_022468	64386	0	0.0288462	0	0	0	0	0	0.0333333	0.0512821	0.0175439	0	0.122222	0.153846	0.166667	0	0	0.0340909	0.021978	0.0657895	0.128571
chr16.3096914	5.91796	0.0218782	-	utr5	Cpg_island	MMP25	NM_022468	64386	0	0	0	0	0	0	NA	0	0	0	0	0.2	0	0	0	0.0714286	NA	0	0.25	0
chr10.3109172	-6.269	0.0143477	-	promoter	Cpg_island	PFKP	NM_002627	5214	0	0.0769231	0.142857	NA	0	0	0	0.272727	0	0.0967742	0	0	0	0	0	0	0	0	0	0
chr16.3109449	3.16257	0.0201356	+	promoter	Cpg_island	MMP25	NM_022468	64386	0	0	0	0	0	0	0	0	0	0	0	0.107143	0	0.111111	0	0	0	0.05	0	0.03125
chr16.3114560	-24.3495	0.00644089	+	promoter	intercpg	IL32	NM_001012718;NM_001012636;NM_001012633;NM_001012631;NM_001012634;NM_001012635;NM_004221;NM_001012632	9235	1	0.608696	0.909091	1	0.75	0.857143	1	1	0.823529	0.758621	0.773585	0.444444	0.578947	0.714286	NA	0.347826	0.6	0.875	0.85	0.727273
chr16.3115134	20.2966	0.00566174	-	promoter	intercpg	IL32	NM_001012718;NM_001012636;NM_001012633;NM_001012631;NM_001012634;NM_001012635;NM_004221;NM_001012632	9235	0	0.166667	0	0	0.197183	0.2	0	0	0.142857	0.53125	0.185185	0.318182	0.276596	0.194444	0.409091	0.25	0.294118	0.375	0.241379	0.25641
chr16.3115156	18.2069	0.00816649	-	promoter	intercpg	IL32	NM_001012718;NM_001012636;NM_001012633;NM_001012631;NM_001012634;NM_001012635;NM_004221;NM_001012632	9235	0	0.027027	0	0	0.222222	0.266667	0.142857	0.125	0.111111	0.457143	0.222222	0.343284	0.211538	0.268293	0.363636	0.25	0.235294	0.46875	0.225806	0.25641
chr6.3118699	1.02294	0.0398916	-	promoter	Cpg_island	BPHL	NR_026648;NR_026649;NM_004332;NR_026650	670	0	0	0	0	0	0	0	0	0	0	0	0.0309278	0.012987	0	0	0	0	0	0	0
chr19.3122366	15.5034	0.0442176	+	utr3	Cpg_island	-	-	-	1	0.677419	0.793103	0.0833333	0.648148	0.818182	NA	0.809524	0.92	0.805556	0.622727	0.881356	0.866667	0.913043	0.873016	0.882353	1	1	0.923077	0.96
chr19.3122434	21.5505	0.039175	-	utr3	Cpg_island	-	-	-	0.266667	0.555556	0	NA	0.217391	0.375	NA	0.310345	0.481481	0.692308	0.472441	0.545455	0.531915	0.5	0.983871	0.608696	0.769231	0.181818	0.68	0.431373
chr19.3134895	14.392	0.0275868	-	promoter	intercpg	GNA15	NM_002068	2769	0.166667	0.923077	NA	1	1	0.8	1	0.636364	0.875	1	0.702703	1	0.875	NA	1	1	1	1	1	1
chr19.3134898	10.2484	0.048008	+	promoter	intercpg	GNA15	NM_002068	2769	NA	0	0	0	0	0	0	0	0	0.0588235	0	0.5	0	0	0.333333	0.0625	0	0	0	0.0487805
chr19.3136164	18.5171	0.00772717	+	utr5	intercpg	GNA15	NM_002068	2769	0.0851064	0.157895	0	NA	0.0909091	0	0.307692	0	0.4	0	0.222222	0.259259	0.25	0.714286	0.205128	0.411765	0.111111	0.3	0.230769	0.263158
chr16.3140490	-5.69872	0.0445254	-	utr5	Cpg_island	FASTKD5	NM_021826	60493	1	1	1	NA	1	1	1	1	0.9	1	1	1	0.68	1	1	0.969697	0.952381	0.916667	0.909091	1
chr16.3140515	-5.46086	0.0455251	-	utr5	Cpg_island	ZSCAN10	NM_032805	84891	0.952381	1	1	NA	0.921053	1	1	1	1	1	1	1	0.95122	0.823529	0.875	1	0.807692	0.913043	1	0.9375
chr20.3148535	-21.8019	0.0178404	+	utr5	North_shore	PRDM16	NM_199454;NM_022114	63976	0.2	0.619048	NA	1	0.952381	1	1	NA	0.777778	0.9	1	0.923077	0.875	0.461538	0.75	0.75	0.555556	0.444444	0.666667	0.615385
chr20.3148589	14.008	0.000259919	+	utr5	North_shore	ProSAPiP1	NM_014731	9762	0.111111	0.107143	0.181818	0	0.12	0	0.0208333	NA	0	0.0769231	0.0243902	0.265957	0.171429	0.2	0.230769	0.16129	0	0.0869565	0.1875	0.277778
chr20.3154989	4.24778	0.0325128	+	promoter	Cpg_island	-	-	-	NA	0	0.0769231	0	0	0	0	0	0	0	0	0.05	0	0	0.047619	0.210526	0	0	0.0526316	0
chr20.3154999	10.0823	0.00321788	+	promoter	Cpg_island	-	-	-	NA	0.142857	0	0	0	0	0	0	0	0	0	0.2	0.181818	0	0.047619	0.210526	0	0	0.105263	0.08
chr19.3178518	3.45647	0.0389636	+	promoter	North_shore	S1PR4	NM_003775	8698	0	0	0	0	0	0	NA	0	0	0	0	0	0	0.1	0	0.148148	0	0	0.0833333	0
chr19.3178743	-21.1493	0.036016	-	utr5	Cpg_island	S1PR4	NM_003775	8698	0.714286	0.714286	1	1	0.636364	0.5	NA	1	0.714286	0.833333	0.625	0.333333	0.666667	0.888889	NA	0.407407	0.571429	0.8	0.3	0.625
chr19.3179959	-22.8292	0.0258919	+	utr3	Cpg_island	S1PR4	NM_003775	8698	1	0.625	0.857143	1	0.965517	NA	NA	1	0.461538	0.928571	0.68	0.391304	0.828571	1	0.461538	0.583333	0.44	0.6	0.666667	1
chr11.3186690	0.940112	0.0445854	-	promoter	Cpg_island	OSBPL5	NM_020896;NM_001144063;NM_145638	114879	0	0	0	NA	0	0	0	0	0	0	0	0.025	0	0	0	0	0	0.0416667	0	0
chr19.3208849	24.1193	0.0420219	-	utr3	South_shore	NCLN	NM_020170	56926	1	0.555556	0.473684	0	0.8	NA	0.538462	NA	0.833333	0.5	NA	1	NA	1	0.333333	0.955556	0.857143	0.666667	0.8	0.866667
chr20.3218741	7.68217	0.0308543	-	promoter	Cpg_island	SLC4A11	NM_001174090;NM_032034;NM_001174089	83959	0	0	0	NA	0	0	0	0	0.0555556	0.2	0	0.25	NA	0	0.15	0.1	0	0.125	0.0526316	0.153846
chr20.3218773	7.12437	0.0201851	+	promoter	Cpg_island	SLC4A11	NM_001174090;NM_032034;NM_001174089	83959	0	0	0	0	0	0	0	0	0	0	0.0442478	0.255319	0	0	0.05	0	0.121212	0.0769231	0	0.108108
chr20.3218799	10.0678	0.0217644	+	promoter	Cpg_island	SLC4A11	NM_001174090;NM_032034;NM_001174089	83959	0.314286	0	0	0	0	0	0	0	0.0769231	0.166667	0.00787402	0.162791	0.266667	0.15	0.0196078	0.113636	0.0909091	0.25	0.103448	0
chr20.3218972	-2.40281	0.0238169	-	promoter	Cpg_island	SLC4A11	NM_001174090;NM_032034;NM_001174089	83959	0	0	0	0.137931	0.0232558	0.133333	0	0	0.03125	0	0	0	0	0	0	0	0	0	0	0
chr20.3220189	1.32874	0.0181575	+	promoter	Cpg_island	SLC4A11	NM_001174090;NM_032034;NM_001174089	83959	0	0	0	0	0	0	0	0	0	0	0	0.0350877	0	0	0	0	0.0571429	0	0	0.0169492
chr20.3220288	0.602925	0.0418164	-	promoter	Cpg_island	SLC4A11	NM_001174090;NM_032034;NM_001174089	83959	0	0	0	0	0	0	0	0	0	0	0	0.0162602	0	0	0	0	0	0	0	0.0138889
chr20.3220624	3.88381	0.0278494	-	promoter	Cpg_island	SLC4A11	NM_001174090;NM_032034;NM_001174089	83959	0	0	0	0	0	0	0	0	0	0	0	0	0	0	0	0.0869565	0	0.153846	0	0.153846
chr20.3220803	4.29091	0.0341307	+	promoter	Cpg_island	-	-	-	0	0	0	0	0	0	0	0	0	0	0	0.228571	0.0555556	0	0	0	0	0	0.0769231	0
chr20.3220848	7.38627	0.0315758	+	promoter	Cpg_island	SLC4A11	NM_001174090;NM_032034;NM_001174089	83959	0.0434783	0	0	0	0.0377358	0	0	0	0.0851064	0.115385	0	0.183673	0.263158	0	0.153846	0	0.111111	0.0555556	0	0.16
chr19.3224571	1.28997	0.012579	-	promoter	North_shore	CELF5	NM_021938;NM_001172673;NR_033342	60680	0	0	0	0	0	0	0	0	0	0	0	0.0416667	0	0	0	0	0	0	0	0.0277778
chr11.3240050	24.3072	0.000750192	+	promoter	South_shore	MRGPRG	NM_001164377	386746	0	0.428571	0	0	0.153846	0.230769	NA	0.5	0	0.15	0.196721	0.255319	0.527778	0.538462	0.441176	0.375	0.454545	0.285714	0.26087	0.434783
chr11.3240675	3.22937	0.0173185	+	promoter	South_shore	C11orf36	NR_027138	283303	0	0	0	0	0	0	0	0	0	0	0	0.13986	0.0183486	0	0	0	0	0	0.0217391	0.0192308
chr4.3245210	2.3094	0.0113539	+	utr3	intercpg	HTT	NM_002111	3064	0	0	0	0	0	0	0	0	0	0	0	0.0744681	0.027027	0	0.0666667	0	0	0	0.025	0
chr11.3253907	22.7816	0.00256267	-	promoter	Cpg_island	MRGPRE	NM_001039165	116534	0	0.142857	0	0	0.388889	0	0	0	NA	0.133333	0	0.225806	0.5	0.230769	0.354839	0.166667	0.5	0.0909091	0.266667	0.125
chr11.3253928	8.87037	0.0310291	+	promoter	Cpg_island	MRGPRE	NM_001039165	116534	0.0714286	0	0	NA	0.133333	0.0769231	NA	0	0.142857	0	0	0.130435	0.111111	0.117647	0.4	0.195652	0.0588235	0	0	0.130435
chr6.3259148	1.18677	0.0440347	-	promoter	Cpg_island	PSMG4	NM_001135750;NM_001128592;NM_001128591	389362	0	0	0	0	0	0	0	0	0	0	0	0	0	0	0	0	0.1	0	0.0526316	0.0240964
chr6.3272837	10.8732	0.00978475	+	utr3	intercpg	SLC22A23	NM_021945;NM_015482	63027	1	0.869565	1	NA	0.871795	0.8	0.809524	0.736842	0.72	0.826087	0.813953	1	0.9	0.928571	1	1	0.909091	0.75	0.875	1
chr16.3284936	6.73434	0.00887856	-	utr5	Cpg_island	ZNF200	NM_001145447;NM_198088;NM_001145446;NM_001145448;NM_003454;NM_198087	7752	0	0	0	0	0	0	0	0	0	0	0	0.318182	0.025641	0	0	0	0.03125	0.0606061	0	0.0909091
chr16.3285117	2.27465	0.016486	-	utr5	Cpg_island	ZNF200	NM_001145447;NM_198088;NM_001145446;NM_001145448;NM_003454;NM_198087	7752	0	0	0	0	0	0	0	0	0	0	0	0.0645161	0	0.0434783	0	0	0	0	0.0454545	0
chr16.3333769	6.07546	0.0215386	+	utr5	Cpg_island	ZNF263	NM_005741	10127	0	0	0	0	0	0	0	0	0	0	0	NA	0	0	0.291667	0	0.105263	0	0.0833333	0
chr7.3340171	4.80191	0.0488121	+	promoter	North_shore	SDK1	NM_152744	221935	NA	0	0	NA	0	NA	0	0	0	0	0	0.222222	0	0	0	0	0	0.142857	0	0.125
chr7.3341124	2.19155	0.0468273	-	utr5	Cpg_island	SDK1	NM_152744	221935	0	0	0	0	0	0	0	0	0	0	0	0.0681818	0	0	0	0	0	0.2	0	0
chr7.3341133	2.53722	0.0400586	-	utr5	Cpg_island	SDK1	NM_152744	221935	0	0	0	0	0	0	0	0	0	0	0	0.0681818	0	0	0	0	0	0	0.125	0
chr1.3351461	6.8171	0.0302441	-	utr3	Cpg_island	PRDM16	NM_199454;NM_022114	63976	0	0	0	0	0	0	0	NA	0	0	0	0.25	0	0	0	0	0	0	0.133333	0.0967742
chr16.3355225	4.92737	0.0242596	+	utr5	Cpg_island	TIGD7	NM_033208	91151	0	0	0	0	0	0	0	0	0	0	0	0.178571	0	0	0	0.170213	0.107143	0	0	0
chr1.3371197	2.69523	0.0290972	-	utr5	Cpg_island	ARHGEF16	NM_014448	27237	0	0	0	0	0	0	NA	0	0	0	0	0	0	0	0.107143	0	0	0.047619	0.047619	0
chr17.3375609	8.88883	0.000515115	+	promoter	South_shore	ASPA	NM_000049;NM_001128085	443	0.75	0.769231	1	1	0.88	0.833333	1	1	0.903226	0.903226	0.891089	0.962963	1	1	1	1	0.9	1	1	1
chr17.3414056	3.14987	0.0408987	+	utr3	intercpg	-	-	-	0	0	0	0	0	NA	0	0	0	0	0	0.12987	0.0666667	0	0	0.0121951	0	0	0	0
chr17.3417207	8.81949	0.0426415	-	utr3	intercpg	TRPV3	NM_145068	162514	0.638298	0.944444	0.826087	1	NA	0.8	0.725	0.878788	0.891304	0.901639	0.903226	0.898551	0.920635	1	1	0.72549	0.886076	0.909091	1	0.983607
chr19.3462885	-23.3158	0.0467584	-	utr3	North_shore	NFIC	NM_205843;NM_005597	4782	1	0.545455	1	1	0.666667	0.333333	1	NA	1	0.6	1	0.590909	0.866667	0.2	0.804348	0.352941	0.866667	NA	0.5	0.904762
chr19.3463233	-11.3868	0.0066453	-	utr3	Cpg_island	NFIC	NM_205843;NM_005597	4782	0.901639	0.914894	0.928571	1	0.989362	0.909091	1	1	0.75	0.973684	0.935484	0.876923	0.782609	0.589286	0.92	0.782051	0.933333	0.944444	0.826923	0.757143
chr19.3463533	-31.4008	0.00110629	+	utr3	Cpg_island	NFIC	NM_205843;NM_005597	4782	0.555556	0.25	0.52381	0.857143	0.2	0.375	0.933333	0.2	0.2	0.454545	0.448276	0.25	0.0714286	0.153846	0.0689655	0.0454545	0.153846	0.1	0	0.333333
chr19.3463542	-32.5197	0.0140098	+	utr3	Cpg_island	NFIC	NM_205843;NM_005597	4782	0.5	1	0.368421	1	1	0.5	0.933333	0.692308	0.666667	0.545455	1	0.5	NA	0.307692	0.214286	0.5	0.625	0.25	0.166667	0.888889
chr19.3463574	-15.9782	0.008547	+	utr3	Cpg_island	NFIC	NM_205843;NM_005597	4782	1	1	1	1	1	1	1	1	0.888889	1	1	0.916667	0.75	1	0.214286	0.846154	0.875	1	0.818182	1
chr19.3463582	-23.9278	0.0305202	+	utr3	Cpg_island	NFIC	NM_205843;NM_005597	4782	0.125	0.894737	0.947368	1	0.578947	0.727273	1	0.92	0.647059	0.727273	0.684211	0.5	0.714286	0.291667	0.142857	0.52	0.625	0.75	0.545455	0.823529
chr19.3463665	-17.9111	0.0156935	+	utr3	Cpg_island	-	-	-	1	0.608696	0.772727	1	0.810811	0.8	0.923077	1	0.888889	0.8	1	0.95082	0.571429	0.733333	0.6875	0.615385	0.785714	0.6	0.625	0.666667
chr4.3464653	-14.8358	0.011537	+	promoter	North_shore	DOK7	NM_001164673;NM_173660	285489	0.105263	0.351351	NA	0.166667	0.492063	0.375	0.222222	0.363636	0.384615	0.222222	0.313725	0.233766	0.25641	0.170213	0.117647	0	NA	0.148148	0.05	0.195122
chr19.3466499	16.9715	0.018293	-	utr3	South_shore	-	-	-	0.344444	0.409091	0.157895	0.425	0.488889	0.272727	0	0.225	0.2	0.225	0.367347	0.292398	0.560976	0.464286	0.486486	0.442308	0.777778	0.269231	0.361111	0.666667
chr17.3469381	15.6665	0.0204882	-	utr3	intercpg	TRPV1	NM_080706;NM_080704;NM_018727;NM_080705	7442	0.111111	1	1	NA	1	1	1	1	0.823529	0.9375	0.6	1	1	1	1	1	1	1	1	1
chr19.3480546	16.6678	0.00474102	-	promoter	North_shore	C19orf77	NM_001136503	284422	0	0.0526316	0.0869565	1	0.0212766	0	0	0.09375	0	0	0	0.16	0.4	0.363636	0.212121	0.0232558	0.0769231	0.117647	0.276596	0.206349
chr19.3480562	16.6736	0.00844849	-	promoter	North_shore	C19orf77	NM_001136503	284422	0	0.0526316	0.173913	NA	0.0212766	0	0	0.1875	0.230769	0	0.317073	0.32	0.1	0.294118	0.333333	0.302326	0.269231	0.111111	0.25	0.125
chr19.3481920	-5.26572	0.00971625	-	promoter	Cpg_island	C19orf77	NM_001136503	284422	0.115385	0.192308	0.181818	0	0.0277778	0	0	0.111111	0	0	0	0	0	0	0	0	0	0	0	0
chr4.3495059	31.7546	0.00690956	+	utr3	intercpg	DOK7	NM_001164673;NM_173660	285489	0.875	0.611111	0.2	NA	0.315789	0.555556	NA	NA	0.142857	0.285714	0.678571	1	0.75	0.916667	0.96875	NA	0.666667	0.888889	0.5	0.75
chr4.3495064	26.532	0.0195749	+	utr3	intercpg	DOK7	NM_001164673;NM_173660	285489	0.875	0.833333	0.2	NA	0.789474	0.555556	NA	NA	0.5	0.333333	0.392857	1	0.565217	0.777778	1	NA	1	0.666667	0.875	0.833333
chr4.3495295	-13.8424	0.0215241	+	utr3	intercpg	DOK7	NM_001164673;NM_173660	285489	1	1	1	1	1	NA	1	NA	1	1	1	1	0.96	1	1	1	NA	0.9	0.882353	0.125
chr17.3501246	-10.0047	0.0488631	-	promoter	intercpg	TRPV1	NM_080704;NM_018727;NM_080705	7442	1	1	NA	NA	0.875	1	NA	1	0.8125	1	1	0.891892	1	1	0.833333	1	0.727273	1	0.666667	0.791667
chr4.3513551	-5.09301	0.0123945	+	utr3	Cpg_island	-	-	-	1	0.969231	1	1	0.945946	1	1	1	1	1	1	1	1	0.714286	0.877551	0.95122	0.935065	0.882353	1	0.973684
chr4.3513566	-5.5417	0.0344129	-	utr3	Cpg_island	-	-	-	1	1	0.933333	NA	1	1	1	1	1	1	1	1	0.733333	NA	0.924658	1	1	0.888889	1	0.894737
chr17.3514117	15.034	0.0222007	+	promoter	intercpg	SHPK	NM_013276	23729	0.764706	0.692308	0.611111	0.681818	0.541667	0.666667	0.583333	0.555556	0.222222	0.62963	0.647059	0.857143	0.952381	0.363636	0.833333	0.75	0.875	0.555556	0.692308	0.714286
chr4.3514154	-13.1766	0.0228138	+	utr3	North_shore	-	-	-	1	0.92	1	NA	1	0.857143	1	0.888889	0.684211	0.923077	0.861386	0.777778	0.605263	0.9375	0.863636	0.75	0.666667	0.923077	1	0.694444
chr4.3514160	-19.4596	0.0256482	-	utr3	North_shore	-	-	-	1	0.9	1	NA	0.877551	1	0	0.941176	0.789474	0.666667	0.843137	0.6875	0.59375	0.909091	0.377049	0.458333	0.75	0.782609	0.705882	0.807692
chr1.3527837	1.7541	0.044302	+	utr5	Cpg_island	MEGF6	NM_001409	1953	0	0	0	0	0	0	0	0	0	0	0	0	0.0512821	0	0	0	0.0416667	0	0	0
chr1.3527997	1.64293	0.0179582	+	utr5	Cpg_island	MEGF6	NM_001409	1953	0	0	0	0	0	0	NA	0	0	0	0.00515464	0.0408163	0	0	0	0.0333333	0	0.0416667	0	0
chr1.3528026	2.22116	0.0265394	+	utr5	Cpg_island	MEGF6	NM_001409	1953	0	0	0	0	0	0	NA	0	0	0	0	0.0408163	0	0	0	0	0.0909091	0.0833333	0	0
chr1.3529108	-23.5832	0.0481981	+	promoter	South_shore	MEGF6	NM_001409	1953	0.375	1	0.8	1	0.375	0.857143	1	0.733333	0.428571	0.692308	1	0.310345	NA	0.727273	0.423077	0.555556	0.8	0.666667	0.166667	0.588235
chr4.3534698	-14.8544	0.00160618	+	promoter	Cpg_island	LRPAP1	NM_002337	4043	0.125	0.105263	0.142857	0	0.117647	0.25	0.666667	0	0.1	0.111111	0.206897	0	0	0	0	0	0.222222	0	0	0
chr4.3534715	14.8604	5.99e-05	-	promoter	Cpg_island	LRPAP1	NM_002337	4043	0	0	0	0	0	0	0	0	0	0	0	0.172414	NA	0.333333	0.142857	0	0.285714	0	0.0909091	0.2
chr19.3535272	18.6298	0.00139754	+	utr3	South_Shelf	FZR1	NM_001136197;NM_016263;NM_001136198	51343	0	0.105263	0	NA	0	NA	0	0.05	0	0.030303	0	0.454545	0.3	NA	0.0952381	0.6	0.133333	0	0.157895	0.210526
chr5.3536525	-23.0562	0.00684265	+	promoter	South_shore	LOC285577	NR_033898	285577	1	0.8	1	1	0.875	NA	1	1	0.833333	0.785714	1	1	0.849057	0.6	0.37931	0.628571	0.7	0.888889	0.666667	0.333333
chr17.3539728	2.47982	0.0335978	+	promoter	Cpg_island	CTNS	NM_004937;NM_001031681	1497	0	0	0	0	0	0	0	0	0	0	0	0.111111	0	0	0	0	0	0.0416667	0	0.0357143
chr1.3539866	-22.3894	0.0429175	+	promoter	North_shore	TPRG1L	NM_182752	127262	0.571429	0.142857	0.444444	NA	0.363636	0.333333	1	0.3	0.4	NA	NA	0.097561	NA	0.571429	0.233333	0.166667	0.4375	0	0.25	0
chr16.3546173	10.4985	0.0391488	+	promoter	North_shore	CLUAP1	NM_015041	23059	0.166667	0.105263	0.0714286	0	0.105263	0.4	0	0.269231	0	0.375	0.1	0.297619	0.4	0.285714	0.146667	0.174419	0.235294	0.352941	0.2	0.176471
chr16.3546444	-9.81618	0.0404095	+	promoter	Cpg_island	CLUAP1	NM_015041	23059	0.984127	0.9375	0.966667	1	0.746667	0.909091	1	0.793103	0.935484	0.818182	0.838235	0.850394	0.913043	0.880952	0.792453	0.909091	0.6875	0.909091	0.619048	0.69697
chr16.3546527	8.45886	0.0377921	+	promoter	Cpg_island	C16orf90	NM_001080524	646174	0.280899	0.209302	0.375	0	0.284404	0.214286	0.25	0.292683	0.244444	0.193548	0.19186	0.414894	0.291139	0.222222	0.413333	0.169811	0.288889	0.365854	0.341463	0.32
chr16.3546604	12.9609	0.0359029	-	promoter	Cpg_island	C16orf90	NM_001080524	646174	0.632653	0.75	0.8	1	0.842105	0.705882	1	0.478261	0.666667	0.849057	0.6875	0.826087	0.857143	0.826087	1	1	0.926829	1	0.708333	0.823529
chr16.3550205	3.07761	0.0172045	+	promoter	Cpg_island	CLUAP1	NM_015041	23059	0	0	0	0	0	0	0	0	0	0	0	0.0652174	0.125	0.142857	0	0	0	0	0	0
chr16.3550869	3.47101	0.0286876	+	promoter	Cpg_island	CLUAP1	NM_015041	23059	0	0	0	0	0	0	0	0	0	0	0	0.2	0	0	0	0	0.0416667	0	0	0.03125
chr19.3557711	3.43136	0.0408152	+	promoter	Cpg_island	C19orf28	NM_174983;NM_021731;NM_001042680	126321	0	0	0	NA	0	0	0	0	0	0	0	0.227273	0.037037	0	0	0	0	0	0.05	0
chr17.3563838	5.16173	0.00929339	+	utr3	intercpg	CTNS	NM_004937;NM_001031681	1497	0	0.027027	0	0	0.0222222	0.111111	0	0	0.0434783	0	0.00877193	0.151515	0.1	0	0.0131579	0.135135	0.0465116	0	0.106383	0.136364
chr1.3567651	-25.1407	0.00118979	-	promoter	Cpg_island	TP73	NM_005427	7161	0	0.219512	0.24	0.5	0.333333	0.454545	0.358974	0.4	0.25	0.153846	0.142857	0.21875	NA	0	0	0.230769	0	0	0	0
chr1.3567786	-5.71434	0.0385861	-	promoter	Cpg_island	TP73	NM_005427	7161	0.0923077	0.214286	0.0714286	0	0.171429	0.222222	0.173333	0.214286	0.1	0.151515	0.0853659	0.137931	0.0731707	0	0.121212	0.103448	0.0909091	0.0243902	0.0294118	0
chr1.3567879	-12.0899	0.0448435	-	promoter	Cpg_island	TP73	NM_005427	7161	0.407407	0.333333	0.1875	0.0952381	0.148936	0.666667	0.428571	0.5	0.342857	0.230769	0.431579	0.294118	0.151515	0.285714	0.221239	0.111111	0.166667	0.428571	0.0888889	0.125
chr1.3568634	3.25678	0.0148294	-	promoter	Cpg_island	WDR8	NM_017818	49856	0	0	0	0	0	0	NA	0	0	0	0	0.0862069	0.0232558	0.0714286	0	0	0.103448	0	0	0
chr17.3571041	4.49532	0.0158812	-	promoter	North_shore	TAX1BP3	NM_014604	30851	0	0	0	0	0.0952381	0	0	0	0	0	0	0.08	0	0.0526316	0.0857143	0.0609756	0.0357143	0	0.0689655	0
chr19.3571863	-25.2124	0.0265939	-	promoter	North_shore	HMG20B	NM_006339	10362	1	0.5	0.3	NA	0.538462	0.714286	0.875	1	0.411765	0.571429	0.666667	0.466667	0.424242	NA	0.681818	0.488889	0.538462	0.3125	0.222222	0.190476
chr17.3573227	-27.5466	0.00791087	-	promoter	South_shore	TAX1BP3	NM_014604	30851	NA	0.714286	1	0.470588	0.705882	0.727273	1	0.7	0.875	0.8125	0.923077	0.481481	0.6875	0.285714	0	0.451613	0.3	0.666667	0.809524	0.692308
chr19.3578773	-14.6557	0.0335739	+	utr3	South_shore	HMG20B	NM_006339	10362	0.862069	0.533333	0.705882	0.5	0.795455	0.6	1	0.6	0.740741	0.8	0.916667	0.576471	0.545455	0.5	0.76	0.689655	0.521739	0.463415	0.821429	0.384615
chr19.3578804	8.64292	0.028141	+	utr3	South_shore	HMG20B	NM_006339	10362	0	0.142857	0.105263	0	0.117647	0	0.3	0.117647	0	0.16	0.00909091	0.231579	0.153846	0.142857	0.157895	0.236842	0.172414	0.0666667	0.125	0
chr19.3585146	14.4053	0.0158932	-	promoter	North_shore	GIPC3	NM_133261	126326	0.333333	0.666667	0.891892	0.596774	0.836735	0.842105	1	0.96	1	0.65	0.873684	1	1	1	1	1	0.857143	0.777778	1	0.916667
chr5.3594586	-5.06811	0.0146952	+	promoter	Cpg_island	IRX1	NM_024337	79192	NA	0	0.0454545	0	0.0454545	0	0	0	0.181818	0	0.157143	0	0	0	0	0	0	0	0	0
chr5.3595037	-1.43798	0.0492748	+	promoter	Cpg_island	IRX1	NM_024337	79192	NA	0	0	NA	0.0625	0	0	0	0	0	0.015873	0	0	0	0	0	0	0	0	0
chr5.3595444	4.3641	0.0292007	-	promoter	Cpg_island	IRX1	NM_024337	79192	0	0	0	0	0	0	0	0	0	0	0	0.307692	0	0	0	0	0	0	0.0333333	0.142857
chr5.3595614	1.77286	0.0213898	+	promoter	Cpg_island	IRX1	NM_024337	79192	0	0	0	0	0	0	0	0	0	0	0	0.0322581	0.0555556	0	0	0.0363636	0	0	0	0
chr12.3600436	7.19926	0.0418527	-	utr5	Cpg_island	PRMT8	NM_019854	56341	0	0	0	0	0	0	0	0	0	0	0	0.6	0	0.111111	0	0	0	0.0588235	0	0
chr12.3600464	1.64179	0.0477017	+	utr5	Cpg_island	PRMT8	NM_019854	56341	0	0	0	0	0	0	NA	0	0	0	0	0.0681818	0.0178571	0	0	0	0	0	0	0.047619
chr12.3600468	11.9358	0.00777047	-	utr5	Cpg_island	PRMT8	NM_019854	56341	0	0	0	0	0	0	0	0	0	0	0	0.6	0	0	0.04	0	0.0526316	0.0588235	0	0.363636
chr12.3600474	9.97654	0.0156381	-	utr5	Cpg_island	PRMT8	NM_019854	56341	0	0	0	0	0	0	0	0	0	0	0	0.642857	0.0909091	0	0	0	0.0526316	0.176471	0	0
chr19.3607004	3.76852	0.0337001	-	promoter	Cpg_island	TBXA2R	NM_201636;NM_001060	6915	0	0	0	0	0	0.0714286	0	0	0	0	0	0.075	0	0	0	0.0487805	0.153846	0	0.0625	0
chr19.3607108	-6.84956	0.0183325	-	promoter	Cpg_island	TBXA2R	NM_201636;NM_001060	6915	0.121212	0.3	0	0	0.166667	0	0	0.166667	0.2	0	0.0533333	0	0.0714286	0	0	0	0	0	0	0
chr19.3607131	1.42333	0.0387025	-	promoter	Cpg_island	TBXA2R	NM_201636;NM_001060	6915	0	0	0	NA	0	0	NA	0	0	0	0	0.0526316	0.0606061	0	0	0.0153846	0	0	0	0
chr19.3607137	3.52162	0.0187584	-	promoter	Cpg_island	TBXA2R	NM_201636;NM_001060	6915	0	0	0	NA	0	0	NA	0	0.0454545	0	0	0.0526316	0.0606061	0	0	0.0923077	0	0	0.030303	0.0740741
chr19.3607149	2.08174	0.0466386	-	promoter	Cpg_island	TBXA2R	NM_201636;NM_001060	6915	0	0	0	NA	0	0	NA	0	0	0	0	0.0526316	0	0	0	0	0	0.0909091	0	0.0740741
chr1.3607419	8.27422	0.00307481	-	utr5	Cpg_island	TP73	NM_005427;NM_001126241;NM_001126240;NM_001126242	7161	1	0.827586	0.928571	1	0.913043	0.8	NA	1	0.777778	0.888889	0.902439	1	1	0.875	1	1	1	1	1	0.967742
chr19.3607437	14.0811	0.0108993	+	promoter	South_shore	TBXA2R	NM_201636;NM_001060	6915	0	0.0344828	0.24	0	0	0.117647	NA	0.0930233	0.125	0.130435	0.100478	0.473684	0.243243	0.266667	0.307692	0.025	0.263158	0.125	0.136364	0.15
chr19.3607609	-19.4665	0.0320816	-	promoter	South_shore	TBXA2R	NM_201636;NM_001060	6915	0	0.133333	0.166667	1	0.325581	NA	0.666667	0.25	0	0.2	0.230769	0.0697674	0.133333	0	0.236364	0	0.0666667	0	0.2	0.150943
chr19.3610891	21.3545	0.021318	-	utr3	North_shore	TBXA2R	NM_201636;NM_001060	6915	0.844156	0.75	0.857143	0.3	0.926829	0.8	0.047619	0.645833	0.814815	0.692308	0.65368	1	0.9	0.666667	0.947368	1	0.538462	0.851852	0.804878	0.966942
chr19.3628653	-9.15563	0.00920972	-	promoter	South_shore	C19orf29	NM_021231;NM_001080543	58509	1	0.916667	1	NA	1	0.8	1	1	1	1	1	0.857143	0.945946	0.928571	0.848485	0.962963	0.666667	0.666667	1	1
chr19.3631165	-24.3149	0.0365819	+	utr3	South_Shelf	PIP5K1C	NM_001195733;NM_012398	23396	1	0.571429	0.333333	0.8	0.823529	0.428571	0.948718	0.423077	0.551724	0.545455	0.807339	0.243243	0.25	0.173913	0.571429	0.466667	0.6	0	0.833333	0.742857
chrX.3631387	1.72126	0.0340157	+	utr5	Cpg_island	PRKX	NM_005044	5613	0	0	0	NA	0	0	0	0	0	0	0	0	0.0322581	0	0	0.111111	0	0	0	0.030303
chr16.3631536	-21.9966	0.0162112	+	utr3	intercpg	SLX4	NM_032444	84464	NA	0.857143	0.777778	1	0.9	1	1	0.714286	1	0.76	0.833333	0.535714	0.775	0.586207	0.466667	1	0.423077	0.333333	0.944444	0.592593
chr19.3633059	-15.9667	0.00354032	-	utr3	intercpg	PIP5K1C	NM_001195733;NM_012398	23396	NA	1	1	1	1	1	1	NA	1	1	1	0.818182	NA	1	0.954545	1	0.625	1	0.777778	0.5
chr19.3636609	-12.4188	0.0485573	-	utr3	North_shore	PIP5K1C	NM_001195733;NM_012398	23396	1	1	0.666667	1	0.961538	1	NA	1	0.75	1	0.774194	0.842105	0.7	0.6875	0.96	0.875	0.73913	NA	0.9	0.666667
chr19.3636616	-14.905	0.0489132	+	utr3	North_shore	PIP5K1C	NM_001195733;NM_012398	23396	1	0.846154	0.714286	0.8	1	0.857143	0.923077	0.636364	0.5	0.8125	1	0.6	0.25	0.857143	0.809524	0.744681	0.666667	0.785714	0.857143	0.833333
chr19.3637319	-10.2367	0.02844	-	utr3	Cpg_island	PIP5K1C	NM_001195733;NM_012398	23396	0.764706	0.916667	1	0.952381	0.853659	0.769231	1	1	0.958333	0.925926	0.970588	0.918919	0.833333	0.666667	0.863636	0.965517	0.8125	0.888889	0.692308	0.645161
chr20.3640540	-24.8296	0.0281224	-	utr3	North_shore	GFRA4	NM_145762;NM_022139	64096	0.882353	0.428571	0.25	1	0.466667	NA	1	0.4	0.6	0.666667	0.678571	0.535714	0.428571	0.571429	NA	0.416667	0.5	0.384615	0.125	0.210526
chr2.3642742	24.6706	0.029876	-	utr5	Cpg_island	COLEC11	NM_024027;NM_199235	78989	0.227273	0.375	0	0	0.266667	0.214286	NA	NA	0.357143	0.210526	0.4375	1	0.403509	0.25	0.421053	0	0.5	0.538462	NA	0.733333
chr1.3650838	-12.4034	0.0095651	+	utr3	South_shore	-	-	-	0.742424	0.868421	0.777778	1	0.934783	0.888889	0.72	0.945946	1	0.814815	0.979167	0.85	0.742857	0.8	0.755102	0.647059	0.71875	0.777778	0.75	0.833333
chr1.3651351	-7.55903	0.00545268	-	utr3	South_shore	-	-	-	1	0.965517	0.777778	NA	1	1	1	1	1	0.961538	1	1	0.903226	0.918367	0.923077	0.923077	0.857143	1	0.833333	0.830189
chr2.3652018	8.54764	0.0466851	-	promoter	intercpg	COLEC11	NM_024027;NM_199235	78989	0.772727	0.904762	0.818182	NA	1	0.666667	1	1	0.714286	0.935484	0.757895	1	0.928571	1	1	0.862069	0.967742	0.956522	1	1
chr2.3652023	-15.296	0.0458706	+	promoter	intercpg	COLEC11	NM_024027;NM_199235	78989	1	1	0.444444	NA	0.9375	1	1	NA	0.863636	1	0.891667	0.772727	0.75	1	1	0.576923	0.8125	0.909091	0.882353	0.421053
chr1.3663666	0.882668	0.0494713	+	promoter	Cpg_island	KIAA0495	NR_033711;NR_033709;NR_033710;NR_033708;NR_033712	57212	0	0	0	0	0	0	0	0	0	0	0	0.0326087	0	0	0	0	0	0	0	0.0133333
chr1.3688164	-25.3115	0.00429164	+	utr3	North_shore	LOC388588	NM_001163724	388588	1	0.652174	0.820513	1	0.639344	0.666667	1	0.875	0.875	0.5	0.777778	0.75	0.3	0.5	0.692308	0.678571	0.466667	0.571429	0.416667	0.6875
chr1.3697642	-13.4262	0.0372573	-	utr3	intercpg	LRRC47	NM_020710	57470	1	0.833333	0.923077	1	1	0.888889	NA	0.833333	0.722222	0.913043	1	0.6	0.851852	0.875	0.585366	NA	0.875	1	0.882353	0.8
chr20.3713322	9.52341	0.0432868	-	utr5	Cpg_island	HSPA12B	NM_001197327;NM_052970	116835	0	0	0	NA	0	0	NA	0	0	0	0	0	0	0.25	0.5	0	0	0.142857	0	0
chr19.3721055	37.2354	0.00382341	+	promoter	North_shore	-	-	-	0.4	0.5	0.375	0	0.235294	0.375	NA	0.625	0.461538	0.5	0.459459	1	0.666667	0.8	1	0.470588	0.8	0.363636	0.444444	1
chr19.3721149	21.788	0.0294806	+	promoter	North_shore	-	-	-	NA	0.333333	0	0	0.111111	0.4	0.05	0.2	0.666667	0.153846	0.478261	0.434783	0.628571	0.210526	0.129032	0.611111	0.478261	0.388889	0.833333	0.578947
chr19.3721187	18.1416	0.0377439	+	promoter	North_shore	-	-	-	NA	0.571429	0.5	0.4	0.52381	0.6	0.05	0.5	0.555556	0.8	0.391304	0.5	0.777778	0.631579	0.709677	0.805556	0.5	0.555556	1	0.578947
chr20.3748996	1.78931	0.0429415	-	promoter	Cpg_island	C20orf27	NM_001039140	54976	0	0	0	0	0	NA	0	0	0	0	0	0.0930233	0	0	0.0188679	0	0	0.0263158	0	0
chr20.3749202	-2.62883	0.0294112	+	promoter	Cpg_island	C20orf27	NM_001039140	54976	0	0	0	0	0.0434783	0	0	0	0.037037	0	0.107527	0	0	0	0	0	0	0	0	0
chr20.3749257	1.48849	0.035075	-	promoter	Cpg_island	C20orf27	NM_001039140	54976	0	0	0	0	0	0	NA	0	0	0	0.0052356	0.0294118	0	0.0285714	0	0	0.107143	0	0	0
chr20.3749370	-3.65138	0.0125188	-	promoter	Cpg_island	C20orf27	NM_001039140	54976	0	0	0	0	0.0305344	0.0769231	0	0.264151	0	0.0588235	0.00531915	0	0	0	0	0	0	0	0	0
chr2.3750129	-7.07144	0.0383602	-	promoter	North_shore	ALLC	NM_018436	55821	1	0.862069	0.896552	1	0.9	1	1	1	0.961538	0.981132	1	1	1	0.724138	0.933333	0.885057	0.846154	0.964286	0.833333	0.822222
chr19.3750708	5.69768	0.0109131	-	utr3	North_shore	-	-	-	1	1	NA	1	0.777778	0.875	1	1	0.904762	0.851852	0.945455	1	1	0.9375	1	1	1	0.888889	1	1
chr6.3752527	0.561726	0.048531	-	promoter	Cpg_island	C6orf145	NM_183373	221749	0	0	0	0	0	0	0	0	0	0	0	0.0181818	0	0	0	0	0	0	0.0192308	0
chr20.3758534	5.78587	0.0394489	+	utr3	Cpg_island	SPEF1	NM_015417	25876	0	0	NA	0	0	0	0	0	0	0	0	0.265306	0	0	0	0	0.111111	0	0.0454545	0
chr20.3758700	-1.71317	0.0378682	-	utr3	Cpg_island	SPEF1	NM_015417	25876	0	0	0	NA	0.0350877	0.1	0	0	0	0.0571429	0	0	0	0	0	0	0	0	0	0
chr19.3762729	3.10943	0.0380859	+	promoter	Cpg_island	APBA3	NM_004886	9546	0	0	0	0	0	0	NA	0	0	0	0	0.166667	0.0625	0.027027	0	0	0	0	0	0
chr17.3765113	-15.8881	0.0249302	-	utr3	intercpg	CAMKK1	NM_172206;NM_032294	84254	1	0.9	1	1	1	NA	1	NA	0.923077	0.884615	1	0.65	1	0.888889	0.269231	0.952381	0.809524	0.916667	0.916667	NA
chr20.3766239	-17.9027	0.0435428	-	promoter	North_shore	SPEF1	NM_015417	25876	0.526316	0.230769	0.111111	0	0.285714	0.2	NA	NA	0.214286	NA	0.333333	0	NA	0.111111	0	0.0588235	0	0.125	0.6	0
chr20.3766281	6.39618	0.035649	-	promoter	North_shore	SPEF1	NM_015417	25876	0	0	0	0	0.025	0	0	NA	0.0909091	0	0.111111	0.142857	0.178571	0.142857	0	0.0454545	0.142857	0	0.0869565	0
chr4.3766521	-9.04566	0.0212342	+	promoter	North_shore	ADRA2C	NM_000683	152	NA	0.125	0	NA	0.210526	0	0	0	0.0769231	0.3125	0.0675676	0	0	0.0833333	0	0	0	0	0	0
chr4.3767213	-26.9336	0.0478616	+	promoter	Cpg_island	ADRA2C	NM_000683	152	NA	0.444444	0.428571	1	0.5	0.666667	NA	NA	0.5	0.333333	0.857143	0.117647	0.352941	0	0.409091	0.56	0	0.642857	0.125	0.695652
chr19.3767409	8.06293	0.0193557	+	utr3	Cpg_island	MRPL54	NM_172251	116541	NA	0.875	1	1	0.818182	0.875	1	0.8	0.806452	0.875	1	1	1	1	0.904762	0.955556	1	1	1	1
chr20.3767527	1.29146	0.0377025	+	promoter	Cpg_island	CENPB	NM_001810	1059	0	0	0	0	0	0	0	0	0	0	0	0.0380952	0	0	0	0	0	0	0	0.0416667
chr20.3767543	0.489672	0.0440594	-	promoter	Cpg_island	CENPB	NM_001810	1059	0	0	0	0	0	0	0	0	0	0	0	0.00980392	0	0	0	0	0.0147059	0	0	0
chr4.3768077	0.989347	0.0212572	-	promoter	Cpg_island	ADRA2C	NM_000683	152	0	0	0	0	0	0	0	0	0	0	0	0.0225564	0	0	0	0.0175439	0	0	0	0
chr1.3774432	7.83905	0.0258241	-	promoter	Cpg_island	KIAA0562	NM_014704	9731	NA	0.075	0	0	0.0384615	0	0	0	0.0555556	0	0	0.318182	0.109091	0.222222	0	0	0.107143	0.15	0.0526316	0.0333333
chr1.3774551	5.30507	0.0128154	+	promoter	North_shore	DFFB	NM_004402	1677	0	0	0	0	0	0	0	0	0	0	0	0.197368	0	0	0	0.0714286	0	0.0666667	0	0.0869565
chr1.3775293	-13.4931	0.00341442	+	promoter	Cpg_island	KIAA0562	NM_014704	9731	1	1	1	1	0.647059	1	NA	1	0.916667	0.9375	0.956522	0.9	0.809524	0.866667	0.893617	0.761905	0.727273	0.875	0.928571	0.7
chr20.3777367	4.73227	0.0373583	+	utr5	Cpg_island	CDC25B	NM_004358;NM_021872;NM_021873	994	0	0	0	NA	0	0	NA	0	0	0	0.0780142	0.152381	0.047619	0.025641	0	0.0128205	0	0	0.09375	0.0571429
chr20.3785678	3.40126	0.00926687	+	utr3	intercpg	-	-	-	NA	NA	0	0	0	0	0	0	0	0	0	0.0612245	0	0.0909091	0.0714286	0	0	0	0	0
chr19.3786204	-2.98068	0.0287246	-	utr5	Cpg_island	MATK	NM_002378;NM_139355;NM_139354	4145	NA	0	0.181818	NA	0.0526316	0	0	0.0625	0	0	0	0	0	0	0	0	0	0	0	0
chr19.3786852	20.9317	0.0271118	+	promoter	South_shore	MATK	NM_002378;NM_139355;NM_139354	4145	0	0.55	0.384615	0.555556	0.294118	0.272727	0	0	0.666667	0.3	0.205882	0.650794	0.612903	0.466667	0.725	0.575342	0.153846	0.380952	0.384615	0.46875
chr19.3802000	-28.4902	0.00278476	+	promoter	South_shore	MATK	NM_002378	4145	0.4375	0.3	NA	NA	0.5	0.142857	0.318182	0.833333	NA	0.285714	0.454545	0	0.107143	0.2	0	0	NA	0	0.363636	0.333333
chr17.3819527	-23.2772	0.0141561	+	utr5	intercpg	P2RX1	NM_002558	5023	0.333333	0.423077	0.444444	NA	0.428571	0.533333	0.888889	0.2	0.684211	0.416667	0.882353	0.184211	0.0769231	0.125	0.37037	0.424242	0.130435	0.4	0.5	0.4
chr17.3828008	-12.234	0.0392213	+	utr3	Cpg_island	ATP2A3	NM_174958;NM_174955;NM_005173;NM_174954;NM_174956;NM_174953;NM_174957	489	0.666667	0.708333	0.625	0.714286	0.810811	0.611111	NA	0.9	0.727273	0.625	0.6	0.767857	0.571429	0.448276	0.533333	0.5	0.333333	0.75	0.545455	0.428571
chr17.3828121	-40.9629	0.00133391	+	utr3	Cpg_island	ATP2A3	NM_174958;NM_174955;NM_005173;NM_174954;NM_174956;NM_174953;NM_174957	489	1	0.5	0.555556	NA	0.533333	NA	1	0.37037	0.4	0.3	0.454545	0	0.36	0.125	0	0.444444	0.142857	0.0666667	0.2	0
chr11.3829534	6.02942	0.00468686	+	utr5	North_shore	PGAP2	NR_027017;NM_001145438;NR_027016;NR_027015;NM_014489;NR_027018;NR_027014	27315	0	0.047619	0	0	0.027027	NA	0	0	0	0	0	0.128571	0.0833333	0	0.135802	0	0.04	0.0526316	0.0952381	0
chr20.3838355	-21.8108	0.00314654	-	utr5	intercpg	MAVS	NM_020746	57506	NA	0.952381	0.666667	1	1	0.75	1	0.709677	0.909091	0.931034	0.983471	0.84	0.5	0.444444	0.25	0.636364	0.655172	0.818182	0.888889	0.892857
chr12.3862343	5.45416	0.0220309	+	utr5	Cpg_island	RHOG	NM_001665	391	0	0	0	NA	0	0	NA	0	0	0	0	0.111111	0	0	0	0.272727	0.0625	0	0	0
chr17.3868005	3.09059	0.0114333	-	promoter	Cpg_island	ATP2A3	NM_174958;NM_174955;NM_005173;NM_174954;NM_174956;NM_174953;NM_174957	489	0	0	0	0	0	0	0	0	0	0	0	0.025641	0.222222	0.0689655	0	0	0	0	0.0625	0
chr17.3868033	-12.8978	0.0304965	+	promoter	Cpg_island	ATP2A3	NM_174958;NM_174955;NM_005173;NM_174954;NM_174956;NM_174953;NM_174957	489	0	0	0	0	0	0.117647	NA	0.363636	0	0.0833333	0.596491	0	NA	0	0	0	0	0	0	0
chr20.3870129	8.84928	0.0336346	+	utr5	Cpg_island	PANK2	NM_153640;NM_153638;NM_024960	80025	0	0	0	0	0	0	0	0	0	0	0	0.514286	0	0	0.137255	0	0	0	0.0322581	0
chr11.3876535	1.33928	0.0209195	+	promoter	Cpg_island	STIM1	NM_003156	6786	0	0	0	0	0	0	0	0	0	0	0	0.0514706	0	0.0192308	0	0.02	0	0.0188679	0	0
chr17.3908151	6.57757	0.0476288	+	utr3	Cpg_island	ZZEF1	NM_015113	23140	NA	0	0	0	0.0434783	0.142857	0	0	NA	0	0.0357143	0	0.189189	0.25	NA	0.047619	0	0	0.142857	0.0909091
chr17.3909439	-12.2291	0.0489786	+	utr3	South_shore	ZZEF1	NM_015113	23140	1	0.857143	0.833333	1	0.875	NA	NA	NA	1	0.947368	1	0.925926	0.586207	0.928571	1	0.878788	0.222222	0.909091	0.8	0.913043
chr19.3925419	10.0229	0.0102452	+	utr3	intercpg	ATCAY	NM_033064	85300	1	0.8	0.9375	0.736842	0.681818	1	1	0.896552	0.866667	0.833333	0.8	0.986301	1	0.833333	1	1	0.846154	0.941176	0.95	1
chr16.3931045	2.33574	0.0380958	+	promoter	Cpg_island	CREBBP	NM_001079846;NM_004380	1387	0	0	0	0	0	0	NA	0	0	0	0	0.0666667	0	0	0.0714286	0	0	NA	0	0
chr19.3933134	0.950064	0.0442441	+	utr5	North_shore	ITGB1BP3	NM_170678	27231	0	0	0	0	0	0	NA	0	0	0	0	0.025641	0	0	0	0	0	0.0285714	0	0
chr19.3942297	-20.3745	0.0324769	+	utr3	South_shore	ITGB1BP3	NM_170678	27231	1	0.378378	0.625	0.666667	0.56	0.333333	0.28	0.185185	0.6	0.36	0.0810811	0.133333	0.352941	0.290323	0.313725	0	0.133333	0.166667	0.166667	0.5
chr19.3958722	-19.5751	0.0420511	-	utr3	Cpg_island	DAPK3	NM_001348	1613	1	0.833333	NA	NA	0.40625	0.769231	1	0.933333	0.4375	0.8125	0.867647	0.428571	0.551724	0.333333	0.666667	0.75	0.666667	0.6	0.333333	0.8
chr19.3958731	-27.6851	0.0305127	-	utr3	Cpg_island	DAPK3	NM_001348	1613	1	0.75	NA	NA	0.5	0.538462	1	0.866667	0.1875	0.75	0.647059	0	0.413793	0.384615	0.666667	0.666667	0.444444	0.1	0.285714	0.7
chr19.3959065	7.25438	0.0354918	+	utr3	Cpg_island	DAPK3	NM_001348	1613	0	0	0	0	0	0	0	0	0	0	0	0.375	0	0	0.0491803	0	0	0	0.1	0
chr19.3971927	-9.46989	0.000384998	-	promoter	South_shore	DAPK3	NM_001348	1613	0.970588	0.9	0.923077	1	1	NA	1	1	0.923077	1	0.97561	0.916201	0.833333	0.9	0.84507	0.823529	0.823529	0.923077	0.833333	0.875
chr19.3983081	-22.917	0.0127306	+	promoter	Cpg_island	SNORD37	NR_002602	26812	1	NA	NA	1	1	NA	1	1	0.636364	0.666667	1	0.71875	0.611111	0.692308	0.928571	0.5625	1	NA	0.666667	0.818182
chr19.3983142	-7.48509	0.0488025	-	promoter	Cpg_island	SNORD37	NR_002602	26812	NA	0.952381	0.909091	0.666667	0.911765	0.909091	1	0.666667	0.941176	0.95	0.910714	0.851852	0.892857	1	0.72	0.615385	0.75	0.833333	0.857143	1
chr20.3996538	9.52841	0.0489886	-	promoter	South_shore	RNF24	NM_007219;NM_001134338;NM_001134337	11237	NA	0.666667	0.857143	0.675	0.64	NA	NA	0.769231	0.545455	0.772727	0.8	0.770492	0.821429	0.857143	0.892857	0.676471	0.777778	0.692308	0.888889	0.9
chr19.4007208	1.24064	0.0415143	+	promoter	Cpg_island	PIAS4	NM_015897	51588	0	0	0	0	0	0	0	0	0	0	0	0.0714286	0	0	0	0.0196078	0	0	0	0
chr19.4045696	21.7868	0.0147373	+	utr3	South_shore	ZBTB7A	NM_015898	51341	0.5	0.375	0.666667	NA	0.73913	0.714286	NA	0.727273	0.538462	0.411765	0.827586	1	0.962963	0.625	0.771429	0.625	0.875	0.636364	0.933333	1
chr19.4045808	21.6057	0.00176625	+	utr3	North_shore	ZBTB7A	NM_015898	51341	0	0.214286	NA	NA	0.115385	0.222222	0.142857	0.333333	0.4	0.333333	0.153846	0.361111	0.5	0.222222	0.46875	0.52	0.5	0.75	NA	0.210526
chr19.4068550	6.4321	0.0228465	+	promoter	South_shore	ZBTB7A	NM_015898	51341	0	0.025641	0.166667	0	0	0	0	0.0208333	0	0.0588235	0	0.103896	0.0882353	0.0285714	0	0.363636	0.037037	0.0588235	0.04	0.0434783
chr19.4068761	15.1627	0.0274803	-	promoter	South_shore	ZBTB7A	NM_015898	51341	0.25	0.3	0.416667	0.217391	0.47619	0.7	0.571429	0.619048	0.5	0.6875	0.432624	0.591837	0.727273	0.380952	0.5	0.653061	0.571429	0.818182	0.909091	0.5625
chr6.4079156	11.364	0.0379613	+	utr5	Cpg_island	C6orf146	NM_173563	222826	0.1	0.0526316	0	NA	0.1	0	0	0.333333	0.2	0	0.142857	0	0.35	0.25	0.333333	0.185185	0.16	0.0833333	0.0833333	0.428571
chr6.4079157	17.4684	0.0327653	-	utr5	Cpg_island	C6orf146	NM_173563	222826	NA	0.166667	0	0	0.230769	0.0909091	NA	0.384615	0.25	0.2	0	0.212766	0.258065	0.6	NA	0.461538	0.333333	0.294118	0	0.25
chr6.4079160	-27.215	0.0482401	+	utr5	Cpg_island	C6orf146	NM_173563	222826	1	0.263158	0	NA	0.25	0.4	1	0.583333	NA	0.5	0.5	0.230769	0.473684	0.2	0.333333	0.222222	0.08	0.545455	0.25	0
chr6.4079234	20.8437	0.0411926	-	utr5	Cpg_island	C6orf201	NM_001085401	404220	NA	0.388889	0.384615	0	0.461538	0.545455	NA	0.692308	0.416667	0.4	0.166667	0.659574	0.548387	0.6	NA	0.538462	0.666667	0.529412	0.3	0.583333
chr6.4079250	17.3487	0.0453439	+	utr5	Cpg_island	C6orf201	NM_001085401	404220	0.1	0.263158	0	NA	0.35	0.4	0	0.583333	0.2	NA	0.178571	0.384615	0.590909	0.375	0.133333	0.407407	0.44	0.230769	0.230769	0.642857
chr6.4079287	26.8585	0.0243378	+	utr5	Cpg_island	C6orf201	NM_001085401	404220	0.333333	0.666667	NA	0	0.142857	0.166667	0	0.333333	0.3	0	0.357143	0.315789	0.5	0.333333	0.6	0.0625	0.75	0.333333	1	0.555556
chr6.4135609	1.86351	0.0332182	+	utr5	Cpg_island	PECI	NR_028588;NM_006117;NM_001166010;NM_206836	10455	0	0	0	0	0	0	0	0	0	0	0	0.0413223	0	0	0	0.0701754	0.025	0	0	0
chr16.4165838	3.63593	0.0338941	+	utr5	Cpg_island	ADCY9	NM_001116	115	0	0	0	0	0	0	0	0	0	0	0	0	0	0	0.2	0	0	0.0555556	0.0384615	0
chr16.4166644	0.852137	0.0282089	-	promoter	North_shore	ADCY9	NM_001116	115	0	0	0	0	0	0	0	0	0	0	0	0.0106383	0	0	0	0	0	0	0	0.037037
chr17.4167138	2.98497	0.0278568	+	utr5	Cpg_island	ANKFY1	NM_016376;NM_020740	51479	0	0	0	0	0	0	0	0	0	0	0	0.0253165	0	0	0.157895	0	0.0555556	0	0	0
chr16.4167664	-8.98682	0.0307109	-	promoter	South_shore	ADCY9	NM_001116	115	1	0.846154	0.888889	1	0.777778	1	1	1	0.9375	1	1	0.917647	0.847826	1	0.826087	0.833333	0.846154	0.928571	0.947368	0.625
chr19.4172183	-18.8257	0.0271417	+	utr3	North_shore	CREB3L3	NM_032607	84699	0.8125	0.235294	0.705882	0.5	0.571429	NA	0.625	0.578947	0.363636	0.7	0.851852	0.719008	0.357143	0.470588	0.405405	0.357143	0.210526	0.454545	0.2	0.478261
chr19.4172907	10.93	0.039629	-	utr3	North_shore	CREB3L3	NM_032607	84699	NA	0	0	0	0	0	0	NA	0	0	0	0.105263	0	0	0	0.785714	0	0	0	0.0357143
chr7.4185485	-4.79384	0.0199284	-	utr5	intercpg	SDK1	NR_027816;NM_152744	221935	1	0.942857	1	1	1	0.888889	1	1	1	0.888889	1	0.952756	0.942857	1	1	0.851064	0.913043	0.923077	0.909091	0.969697
chr6.4191693	17.6526	0.00522176	-	promoter	intercpg	-	-	-	0.444444	0.9	1	NA	0.833333	0.857143	NA	0.6	1	0.833333	0.833333	1	1	0.888889	1	1	0.9	1	1	1
chr4.4228595	15.2232	0.0158983	+	utr5	Cpg_island	OTOP1	NM_177998	133060	0	0.0454545	0.285714	0	0.125	0.2	NA	0	0.157895	0.0714286	0	0.133333	0.571429	0.444444	0.352941	0.0833333	0.263158	0	0.117647	0.181818
chr4.4228934	14.2408	0.0075735	-	promoter	Cpg_island	OTOP1	NM_177998	133060	0	0.176471	0	0	0	0	NA	0	0.0714286	0	0.0862069	0.35	0.217391	0.105263	0.142857	0.296296	0.285714	0.166667	0.0344828	0
chr4.4228990	4.48248	0.0142099	+	promoter	Cpg_island	OTOP1	NM_177998	133060	0	0	0	0	0	0	NA	0	0	0	0	0.131579	0.0952381	0	0	0	NA	0	0.0714286	0
chr4.4229174	1.33534	0.028427	+	promoter	Cpg_island	OTOP1	NM_177998	133060	0	0	0	0	0	0	0	0	0	0	0	0	0	0	0	0.0294118	0	0	0	0.04
chr4.4229217	3.7722	0.0278693	+	promoter	Cpg_island	OTOP1	NM_177998	133060	0	0	0	0	0	0	0	0	0	0	0	0.166667	0.125	0	0	0	0.111111	0	0	0
chr4.4229838	2.72088	0.00179869	+	promoter	Cpg_island	OTOP1	NM_177998	133060	0	0	0	0	0	0	0	0	0	0.0144928	0	0.0721649	0	0.0793651	0	0.010989	0.0126582	0.015873	0.025641	0.0470588
chr19.4237215	3.80351	0.0340186	+	utr3	intercpg	EBI3	NM_005755	10148	0	0	0	0	0	0	0	0	0	0	0	0.192982	0	0	0.0227273	0.0357143	0	0	0	0
chr19.4278848	7.02753	0.037232	+	utr5	North_shore	SHD	NM_020209	56961	0	0	0	0	0	0	0	0	0	0	0	0.133333	0.0526316	0	0.421053	0	0	0	0	0
chr19.4278883	1.54136	0.0344303	-	utr5	North_shore	SHD	NM_020209	56961	0	0	0	0	0	0	0	0	0	0	0	0.0873786	0	0	0	0.0285714	0	0.0133333	0	0
chr19.4279053	2.01195	0.030298	-	utr5	Cpg_island	SHD	NM_020209	56961	0	0	0	0	0	0	0	0	0	0	0	0	0.047619	0	0	0	0.15	0.0465116	0	0
chr19.4280001	-2.1218	0.0441026	+	utr5	South_shore	SHD	NM_020209	56961	0	0	0	0	0	0	0	0.136364	0.05	0.0322581	0	0	0	0	0	0	0	0	0	0
chr16.4304745	-13.1678	0.0122673	+	promoter	South_shore	SDK1	NR_027816;NM_152744	221935	1	0.875	0.818182	NA	0.904762	0.909091	1	0.882353	0.916667	0.857143	1	0.939394	0.871795	0.740741	0.25	0.757576	0.916667	0.727273	0.692308	0.8125
chr17.4336263	-19.3637	0.0384708	+	promoter	intercpg	SPNS3	NM_182538	201305	0.923077	0.916667	0.6	1	0.571429	NA	1	NA	0.666667	0.555556	NA	0.568966	0.592593	0.75	0.666667	0.6	0.545455	0.411765	0.611111	0.916667
chr16.4380753	4.48594	0.0318813	+	promoter	South_Shelf	GLIS2	NM_032575	84662	0	0	0	0	0	0	0	0	0	0	0	0.147541	0.0454545	0	0.121212	0	0	0	0	0
chr16.4382269	-11.8858	0.0286396	+	utr5	intercpg	GLIS2	NM_032575	84662	0.7	0.777778	1	1	0.882353	1	1	0.962963	0.9	0.944444	1	0.775	0.818182	0.875	0.75	0.689655	1	1	0.666667	0.90625
chr19.4400478	3.14055	0.0243059	-	promoter	Cpg_island	SH3GL1	NM_001199943;NM_003025;NM_001199944	6455	0	0	0	0	0	0	0	0	0	0	0	0.0833333	0	0	0	0	0.1	0	NA	0.0833333
chr19.4445669	-27.7124	0.0277658	+	promoter	North_shore	UBXN6	NM_025241;NM_001171091	80700	1	0.833333	0.8	1	0.526316	1	1	NA	0.3	0.875	0.695652	0.615385	0.566667	0.285714	0.962963	0.375	0.333333	0.166667	0.5	0.857143
chr19.4445701	-13.9576	0.0162598	+	promoter	North_shore	UBXN6	NM_025241;NM_001171091	80700	1	1	1	1	1	1	1	NA	0.9	1	1	0.384615	1	0.8	0.740741	1	0.833333	0.944444	1	0.714286
chr18.4455420	2.78603	0.0205039	-	promoter	Cpg_island	-	-	-	0	0	0	0	0	0	0	0	0	0	0	0.0204082	0	0	0.153846	0	0	0	0.0666667	0
chr18.4455527	3.25234	0.0273589	-	promoter	Cpg_island	-	-	-	0	0	0	0	0	0	0	0	0	0	0	0.112903	0	0	0.0671141	0	0	0	0.0294118	0
chr19.4459093	-9.4753	0.0123122	+	promoter	South_shore	UBXN6	NM_025241;NM_001171091	80700	NA	1	1	NA	1	0.857143	1	0.925926	1	0.857143	1	0.924528	0.75	0.833333	0.962963	0.85	1	0.625	0.8125	1
chr19.4459096	-11.0414	0.0211607	+	promoter	South_shore	UBXN6	NM_025241;NM_001171091	80700	NA	1	0.833333	NA	1	1	1	1	1	1	1	1	1	0.6	0.807692	0.85	1	0.625	0.785714	1
chr12.4467139	8.92248	0.0461321	+	utr3	intercpg	C12orf5	NM_020375	57103	1	0.888889	1	NA	0.827586	0.933333	1	1	0.888889	1	0.666667	1	1	1	1	1	1	0.875	1	1
chr17.4487886	1.38466	0.0428006	-	utr5	Cpg_island	SMTNL2	NM_001114974;NM_198501	342527	0	0	0	0	0	0	0	0	0	0	0	0	0	0.0277778	0.0612245	0	0	0.0344828	0	0
chr9.4488809	10.3511	0.0181659	+	promoter	North_shore	SLC1A1	NM_004170	6505	0.703704	1	0.944444	NA	0.636364	0.9	1	0.866667	0.714286	0.931034	0.895833	1	1	0.954545	1	1	0.933333	0.857143	0.904762	0.869565
chr9.4489157	-10.4641	0.01138	-	promoter	North_shore	SLC1A1	NM_004170	6505	1	0.833333	0.904762	NA	1	NA	1	1	1	0.8	NA	0.795181	0.909091	1	0.84	0.833333	NA	0.846154	1	0.875
chr19.4503484	6.83941	0.0407174	+	utr3	intercpg	PLIN4	NM_001080400	729359	0	0	0	NA	0	0	0	0	0	NA	0	0.333333	0	0	0.0909091	0.0666667	0	0	0	0
chr16.4505960	-14.9842	0.0318515	+	utr3	intercpg	DNAJA3	NM_001135110;NM_005147	9093	0.767442	0.538462	0.78125	0.448276	0.71875	0.8	0.969697	0.777778	0.846154	0.526316	0.833333	0.622222	0.596491	0.315789	0.588235	0.647059	0.521739	0.470588	0.571429	0.727273
chr17.4510827	3.18669	0.0287507	+	utr3	South_shore	SMTNL2	NM_001114974;NM_198501	342527	0	0	0	0	0	0	0	0	0	0	0	0.0980392	0	0	0.142857	0	0	0	0	0.037037
chr19.4517804	4.11	0.00977031	+	promoter	intercpg	PLIN4	NM_001080400	729359	0	0	0	0	0	0	0	0	0	0	0	0.0461538	0.0294118	0	0	0	0.375	0	0	0.03125
chr19.4518543	5.38933	0.02028	-	promoter	intercpg	PLIN4	NM_001080400	729359	0	0	0	0	0.0625	0	0	0	0	0	0	0.04	0	0	0	0.0588235	0.153846	0	0	0.137931
chr19.4535185	-8.14809	0.0300105	-	utr5	Cpg_island	PLIN5	NM_001013706	440503	0.439024	NA	0.133333	0	0	0	0.05	0	0.0588235	0	0	0	0	0	0	0	0	0	0	0
chr3.4535791	-1.56433	0.0452052	+	promoter	South_shore	ITPR1	NM_001168272;NM_002222;NM_001099952	3708	0	0	0	0	0	0	0	0.0689655	0.05	0.0454545	0	0	0	0	0	0	0	0	0	0
chr19.4543429	-20.5097	0.035424	+	utr3	Cpg_island	LRG1	NM_052972	116844	1	0.428571	0.928571	NA	1	1	NA	0.65	0.7	1	0.428571	0.62069	0.5	NA	0.69697	0.73913	0.555556	0.5	0.428571	0.625
chr17.4546059	12.8088	0.0279992	-	promoter	South_shore	ALOX15	NM_001140	246	0	0	0.190476	0	0.238095	NA	0	0.2	0	0.08	0.2	0.0875	0.214286	0.176471	0.352941	0.0689655	0.307692	0.25	NA	0.210526
chr19.4639622	1.57093	0.0241147	-	utr5	Cpg_island	TNFAIP8L1	NM_001167942;NM_152362	126282	0	0	0	NA	0	0	0	0	0	0	0	0	0.0555556	0.0625	0	0	0.025641	0	0	0
chr17.4641922	22.2769	0.0352438	-	promoter	North_shore	CXCL16	NM_001100812;NM_022059	58191	0	0.444444	0.263158	NA	0.735294	NA	0.208333	0	0.384615	0.571429	0.307692	0.630952	0.576923	0.333333	0.48	0.75	0.772727	0.5	0.428571	0.384615
chr17.4642080	10.8126	0.0206142	-	promoter	Cpg_island	ZMYND15	NM_032265;NM_001136046	84225	0	0	0	0	0.157895	0	0	0	0	0.0714286	0	0.210526	0.0625	0.111111	0.333333	0	0	0	0.2	0.227273
chr17.4642674	2.56781	0.0315287	-	promoter	Cpg_island	CXCL16	NM_001100812;NM_022059	58191	0	0	0	0	0	0	0	0	0	0	0	0.142857	0	0.03125	0	0	0	0	0.0217391	0
chr19.4652471	18.56	0.0256715	-	utr3	Cpg_island	TNFAIP8L1	NM_001167942;NM_152362	126282	0.709677	0.9	0.916667	0	0.861111	0.833333	NA	0.806452	0.6	0.875	0.333333	0.806452	0.909091	1	1	1	0.9	0.75	0.857143	0.969697
chr16.4659591	11.4341	0.0332749	-	utr3	Cpg_island	FAM100A	NM_145253	124402	1	0.705882	0.909091	1	1	NA	0.857143	0.4375	0.8	0.727273	1	1	0.833333	1	1	1	1	1	1	1
chr16.4665542	-15.9839	0.0432127	+	promoter	Cpg_island	FAM100A	NM_145253	124402	0.761905	0.555556	0.724138	1	0.766667	0.928571	1	0.4375	0.833333	0.777778	0.909091	0.318182	0.4	0.75	0.862069	0.708333	0.608696	0.727273	0.625	0.694444
chr16.4665766	8.24924	0.00987545	-	promoter	Cpg_island	FAM100A	NM_145253	124402	1	0.8125	NA	1	0.722222	NA	1	0.944444	0.923077	1	0.8125	1	1	1	1	1	1	1	1	1
chr19.4676076	-6.64346	0.00518219	+	utr3	North_shore	DPP9	NM_139159	91039	1	1	1	1	1	1	NA	1	NA	1	1	1	0.826087	0.833333	0.925	0.947368	0.944444	1	0.894737	1
chr17.4690977	18.2556	0.039508	-	promoter	North_shore	GLTPD2	NM_001014985	388323	0.285714	0.28	0.235294	0.578947	0.25	0.2	NA	0.0344828	0.294118	0.529412	0.442478	0.339623	0.571429	0.35	0.865385	0.346154	0.37037	0.75	0.5	0.380952
chr17.4710122	1.45533	0.0303291	-	promoter	Cpg_island	PLD2	NM_002663	5338	NA	0	0	0	0	0	0	0	0	0	0	0.037037	0	0	0	0.0277778	0	0	0	0
chr12.4714141	-6.34596	0.0431895	+	utr5	intercpg	DYRK4	NM_003845	8798	0.482759	0.0666667	0	0	0	0.0769231	0	0	0.0526316	0.114286	0.047619	0	0.0392157	0	0	0	0	0	0	0
chr12.4714144	-6.34211	0.0435825	+	utr5	intercpg	DYRK4	NM_003845	8798	0.482759	0.0666667	0	0	0	0.0769231	0	0	0.0526316	0.114286	0.047619	0	0.0392157	0	0	0	0	0	0	0
chr1.4714533	-2.11477	0.0473875	+	promoter	Cpg_island	AJAP1	NM_018836;NM_001042478	55966	0	0	0	NA	0	0	0	0	0.0909091	0.111111	0.0078125	0	0	0	0	0	0	0	0	0
chr1.4714756	0.983375	0.0260322	-	promoter	Cpg_island	AJAP1	NM_018836;NM_001042478	55966	0	0	0	0	0	0	0	0	0	0	0	0.0350877	0.0142857	0.0285714	0	0	0	0	0	0
chr1.4714771	0.881284	0.017602	-	promoter	Cpg_island	AJAP1	NM_018836;NM_001042478	55966	0	0	0	0	0	0	0	0	0	0	0	0.0263158	0	0	0	0.0107527	0	0.030303	0	0
chr1.4714818	1.93605	0.0369574	-	promoter	Cpg_island	AJAP1	NM_018836;NM_001042478	55966	0	0	0	0	0	0	0	0.0178571	0	0	0	0.079646	0.0338983	0	0	0	0.0392157	0	0.0285714	0
chr1.4714825	0.925605	0.0182006	-	promoter	Cpg_island	AJAP1	NM_018836;NM_001042478	55966	0	0	0	0	0	0	0	0	0	0	0	0.0263158	0	0	0	0	0.0196078	0	0.0232558	0
chr1.4714840	1.73918	0.0388593	-	promoter	Cpg_island	AJAP1	NM_018836;NM_001042478	55966	0	0	0	0	0.00917431	0	0	0	0.0344828	0	0	0.0263158	0.0142857	0.0588235	0	0	0.1	0	0.0185185	0
chr16.4736774	-8.62567	0.00268187	-	utr3	South_Shelf	MGRN1	NM_001142291;NM_015246;NM_001142289;NM_001142290	23295	1	0.982456	1	1	1	0.8	1	1	1	1	1	0.869231	0.794872	1	1	0.933333	0.79661	0.914286	0.847826	0.943662
chr16.4737980	-40.7814	0.00151142	+	utr3	intercpg	MGRN1	NM_001142291;NM_015246;NM_001142289;NM_001142290	23295	0.576923	0	0.375	0.789474	0.423077	0.764706	0.979167	0.76	0.615385	0.785714	0.55814	0.38	0.230769	0.241379	0	0.333333	0	0	0.0666667	0.114286
chr16.4737981	-25.783	0.0344989	-	utr3	intercpg	MGRN1	NM_001142291;NM_015246;NM_001142289;NM_001142290	23295	0.333333	0.0215054	0.625	0.272727	0.438095	0.733333	0.555556	0.5	0.7	0.862069	0.282927	0.52381	0.333333	0.5	0	0.36	0	0	0.666667	0.195402
chr16.4737984	9.70811	0.0123733	+	utr3	intercpg	MGRN1	NM_001142291;NM_015246;NM_001142289;NM_001142290	23295	0.897436	0.93617	0.625	0.789474	0.980952	0.764706	0.875	0.92	0.923077	0.857143	0.764706	1	1	1	1	0.866667	0.962963	0.962264	0.8	0.914286
chr6.4775405	13.8298	0.0411206	+	promoter	Cpg_island	CDYL	NR_026590;NM_004824	9425	NA	0.2	0	0	0.105263	0	0	NA	0	0.222222	0.0625	0.195402	0.129032	0.428571	0.473684	0	0.285714	0	0.5	0.0769231
chr6.4775867	4.20635	0.0291045	+	promoter	Cpg_island	CDYL	NR_026590;NM_004824	9425	NA	0	0	NA	0	0	0	0	0	0	0	0.025641	0.0909091	0	0	0	0	0	0.214286	0
chr6.4775874	3.24117	0.0179346	+	promoter	Cpg_island	CDYL	NR_026590;NM_004824	9425	NA	0	0	NA	0	0	0	0	0	0	0	0.025641	0.0909091	0	0.0434783	0	0	0	0	0
chr6.4775875	10.9381	0.027895	-	promoter	Cpg_island	CDYL	NR_026590;NM_004824	9425	NA	0	0	0	0	0	0	0	0	0	0	0.615385	0.136364	0	0	0	0.142857	NA	0	0
chr6.4776085	4.44808	0.0443089	+	promoter	Cpg_island	CDYL	NR_026590;NM_004824	9425	0	0	0	0	0	0	NA	0	0	0	0	0.291667	0.0294118	0	0	0	0	0	0.047619	0
chr6.4776847	5.30436	0.0227144	+	utr5	Cpg_island	CDYL	NR_026590;NM_004824	9425	0	0	0	0	0	0	0	0	0	0	0	0.0686275	0	0	0.314286	0.0588235	0	0	0	0
chr9.4792652	2.37607	0.0255847	-	promoter	Cpg_island	RCL1	NM_005772	10171	0	0	0	0	0	0	0	0	0	0	0	0.0888889	0	0.0384615	0	0	0	0	0.0434783	0
chr17.4802301	2.59247	0.0494899	+	promoter	Cpg_island	C17orf107	NM_001145536	100130311	0	0	0	0	0	0	0	0	0.0625	0	0	0.0238095	0.0454545	0	0	0.0344828	0.166667	0.04	0	0
chr17.4802344	16.5508	0.0415249	-	promoter	Cpg_island	C17orf107	NM_001145536	100130311	0.526316	0.5	0.333333	0	0.3125	NA	0.12766	0.15625	0.457143	0.352941	0.30137	0.243243	0.342466	0.276923	0.555556	0.575758	0.483871	0.461538	0.666667	0.714286
chr17.4802590	-8.78828	0.0425259	+	promoter	Cpg_island	CHRNE	NM_000080	1145	0	0	0.1	NA	0.241379	0.166667	NA	0.0625	0.230769	0.157895	0.107143	0	0	0.0454545	0	0	0	0.2	0	0.153846
chr17.4802591	-13.6778	0.00101018	-	promoter	Cpg_island	C17orf107	NM_001145536	100130311	0.166667	0.0571429	0.142857	0	0.215686	0.111111	NA	0.0526316	0.1	0.130435	0.355932	0	0.0454545	0	0	0	0	0	0.166667	0
chr7.4802596	-11.1587	0.0239175	+	utr3	North_shore	FOXK1	NM_001037165	221937	NA	1	1	1	1	1	1	1	0.75	1	1	1	0.8	NA	1	0.847826	0.714286	0.9	0.75	0.833333
chr7.4802597	-14.4355	0.00742322	-	utr3	North_shore	C17orf107	NM_001145536	100130311	1	1	1	NA	1	0.923077	NA	1	1	1	1	0.880952	0.555556	NA	0.625	1	1	0.777778	0.769231	1
chr17.4802632	11.6233	0.00776899	-	promoter	Cpg_island	CHRNE	NM_000080	1145	0	0.0833333	0.133333	0	0	0	NA	0	0	0	0	0.230769	0.210526	0.153846	0	0	NA	0.0833333	0.25	0.157895
chr17.4802642	13.2375	0.0101132	-	promoter	Cpg_island	C17orf107	NM_001145536	100130311	0	0	0	0	0	0	NA	0	0	0.0833333	0.125	0.259259	0.210526	0	0	0.181818	NA	0.166667	0	0.368421
chr17.4802658	21.7196	0.000595629	-	promoter	Cpg_island	C17orf107	NM_001145536	100130311	0.125	0	0.133333	0	0	0.125	NA	0.222222	0.1	0.0833333	0.25	0.333333	0.277778	0.166667	0.235294	0.272727	NA	0.166667	0.375	0.526316
chr17.4802693	13.5291	0.0406229	-	promoter	Cpg_island	C17orf107	NM_001145536	100130311	0	0	0.133333	0	0	0	NA	0.111111	0.1	0.0833333	0.125	0.0740741	0.0526316	0.153846	0	0.454545	NA	0.25	0.25	0.578947
chr7.4803527	-2.95421	0.0454153	+	utr3	South_shore	FOXK1	NM_001037165	221937	NA	1	1	NA	1	1	1	1	1	1	1	1	0.75	1	0.935484	0.944444	1	1	1	1
chr17.4804038	-17.2365	0.00438123	+	utr3	Cpg_island	C17orf107	NM_001145536	100130311	0.666667	0.266667	0.210526	0.560976	0.324324	0.125	0.166667	0.0909091	0.346154	0.428571	0.258065	0.205128	0	0	0.148148	0.162162	0.0714286	0.0909091	0.266667	0.0869565
chr17.4804454	9.90239	0.0497797	+	utr3	Cpg_island	CHRNE	NM_000080	1145	NA	0	0	NA	0	0	0	0	0.0769231	0.0740741	0.0227273	0.404255	0.230769	0.3	0	0	0.153846	0.1	0	0.0526316
chr20.4804582	6.97318	0.0496818	-	promoter	South_shore	RASSF2	NM_014737	9770	0	0.176471	0.05	0	0	0	0	0.0555556	0.0909091	0.2	0.0833333	0.209302	0.15625	0	0.222222	0.0952381	0.0625	0.0833333	0.0416667	0.111111
chr17.4805014	-20.6456	0.00496805	-	utr3	Cpg_island	C17orf107	NM_001145536	100130311	1	0.571429	0.444444	NA	0.814815	0.666667	NA	0.809524	0.625	0.807692	0.807692	0.714286	0.617647	0.4	0.666667	0.444444	0.4375	0.222222	0.727273	0.483871
chr17.4805076	-20.5685	0.0304044	+	utr3	Cpg_island	C17orf107	NM_001145536	100130311	0.788462	0.307692	0.115385	0.416667	0.225806	0.384615	1	0.2	0.666667	0.2	0.733333	0.268293	0.214286	0.2	0.137931	0.245614	0	0.444444	0.222222	0.2
chr17.4805119	-30.7389	0.0095739	-	utr3	Cpg_island	C17orf107	NM_001145536	100130311	NA	0.75	NA	0.793103	0.730769	0.666667	0.92	0.714286	0.578947	0.3	0.979798	0.269231	0.583333	NA	0.826087	0.551724	0.5	0.4375	0	0.173913
chr17.4805304	5.35058	0.0355833	+	utr3	Cpg_island	C17orf107	NM_001145536	100130311	0.113636	0	0	0	0	0	0	0	0	0.0357143	0	0.164948	0.0526316	0.0227273	0	0.179487	0	0	0.0384615	0.0909091
chr7.4808562	17.8298	0.0110634	+	utr3	South_shore	FOXK1	NM_001037165	221937	0	0.16	0.363636	NA	0	0.333333	0	0.153846	0.0625	0.130435	0.0588235	0.0727273	0.111111	0.266667	0.307692	0.37931	0.4	0.230769	0.375	0.583333
chr16.4818891	4.51056	0.0388313	-	promoter	Cpg_island	ZNF500	NM_021646	26048	0	0	NA	0	0	0	0	0	0	0	0	0.0571429	0	0	0.253521	0	0	0	0	0.0151515
chr7.4828371	9.07151	0.0382026	+	promoter	Cpg_island	KIAA0415	NM_014855	9907	1	0.789474	1	0.5	0.96	0.916667	NA	0.925926	0.962963	0.96875	0.909091	1	1	1	0.77551	1	1	0.904762	1	1
chr7.4828372	-6.79391	0.0342957	-	promoter	Cpg_island	KIAA0415	NM_014855	9907	NA	1	1	NA	1	1	1	1	1	1	1	1	1	0.789474	0.807692	0.916667	1	1	1	1
chr7.4828792	-13.6071	0.0115788	-	promoter	South_shore	KIAA0415	NM_014855	9907	0.983333	1	0.904762	1	0.962963	0.875	0.75	0.709091	0.944444	0.795455	0.872611	0.906977	0.666667	0.545455	0.804348	0.89899	0.728814	0.72973	0.804878	0.723684
chr7.4830067	7.33463	0.0112378	+	promoter	South_shore	KIAA0415	NM_014855	9907	1	0.853659	0.804878	NA	0.777778	1	0.833333	0.965517	0.8125	0.848485	0.841121	0.9375	0.916667	1	1	0.960784	0.952381	0.846154	0.875	0.9375
chr7.4831959	-13.0209	0.0134229	-	utr3	North_shore	-	-	-	0.4	0.125	0.285714	NA	0.3125	0.166667	0.1	0.333333	0	0	0.230769	0.0454545	0.111111	0.133333	0	0	0.133333	0	0	0.0512821
chr7.4833130	-14.5323	0.0340764	+	utr3	South_shore	-	-	-	1	0.555556	1	0.961538	0.695652	NA	0.947368	0.911765	0.882353	0.738095	0.737805	0.741935	0.727273	0.714286	0.804878	0.509804	0.681818	0.923077	0.76	0.634146
chr7.4833170	-5.2057	0.0392258	+	utr3	South_shore	-	-	-	1	0.933333	1	1	1	1	1	1	0.923077	0.966102	1	1	0.825	0.947368	0.898734	0.858586	1	0.8	0.9375	1
chr17.4853602	3.40644	0.0288578	+	promoter	Cpg_island	ENO3	NM_053013;NM_001193503;NM_001976	2027	0	0	0	0	0	0	0	0	0	0	0	0.136364	0	0	0	0.045977	0	0	0.0952381	0
chr19.4868435	-16.9853	0.0112965	-	promoter	intercpg	ITPR1	NM_001168272;NM_002222;NM_001099952	3708	1	1	1	0.933333	1	NA	0.833333	0.8	NA	0.875	NA	0.596154	0.7	0.727273	0.941176	0.809524	0.875	0.6	0.583333	1
chr17.4871258	2.03682	0.0421252	-	promoter	Cpg_island	SPAG7	NM_004890	9552	0	0	0	NA	0	0	0	0	0	0	0	0.0769231	0	0.0769231	0	0	0	0	0.0526316	0
chr17.4872238	13.776	0.0110932	+	promoter	South_shore	RADIL	NM_018059	55698	0.258065	0.0625	0	0	0.205128	0.142857	0	0.133333	0	0.111111	0.190476	0.329114	0.210526	0	0.264706	0.298246	0.269231	0.266667	0.208333	0.222222
chr16.4897407	1.97604	0.020909	+	promoter	Cpg_island	UBN1	NM_001079514;NM_016936	29855	0	0	0	0	0	0	0	0	0	0	0	0.0704225	0	0	0	0.0285714	0	0	0.05	0
chr16.4897619	0.924391	0.0196545	-	promoter	Cpg_island	GLYR1	NM_032569	84656	0	0	0	0	0	0	0	0	0	0	0	0.0277778	0	0	0	0.0178571	0	0	0.0147059	0
chr16.4898868	21.3927	0.00287461	-	promoter	South_shore	GLYR1	NM_032569	84656	0.26087	0.181818	0.5	0	0.285714	0.4	NA	NA	0.5	0.411765	0	0.619048	0.666667	0.5	0.409091	0.424242	0.363636	0.4	0.666667	0.833333
chr16.4898873	-25.3345	0.00714831	-	promoter	South_shore	GLYR1	NM_032569	84656	1	0.636364	1	1	1	0.8	NA	NA	1	0.941176	1	0.380952	0.857143	0.647059	0.714286	0.375	0.636364	1	0.833333	0.833333
chr12.4918883	1.61073	0.0412732	-	utr5	Cpg_island	KCNA6	NM_002235	3742	0	0	0	0	0	0	0	0	0	0	0	0.0943396	0	0	0	0	0.025641	0.0294118	0	0
chr7.4923567	2.73455	0.0282323	+	promoter	Cpg_island	RADIL	NM_018059	55698	0	0	0	0	0	0	0	0	0	0	0	0.126214	0.0454545	0.0454545	0	0	0	0	0	0
chr7.4923615	4.60673	0.0149499	+	promoter	South_shore	RADIL	NM_018059	55698	0	0	0	0	0.0246914	0	0	0	0.02	0.0615385	0	0.113208	0.204545	0.0227273	0	0	0.0681818	0.0212766	0.06	0.046729
chr6.5084733	4.08322	0.0449753	+	promoter	Cpg_island	PPP1R3G	NM_001145115	648791	0	0	0	0	0	0	0	0	0	NA	0	0.025	0	0	0	0	0.0952381	NA	0	0.4
chr6.5084754	2.02431	0.0405662	+	promoter	Cpg_island	PPP1R3G	NM_001145115	648791	0	0	0	0	0	0	0	0	0	0	0	0.0666667	0	0	0.05	0	0	0	0	0
chr6.5085528	4.13635	0.0434417	-	promoter	Cpg_island	PPP1R3G	NM_001145115	648791	0	0	NA	0	0	0	NA	0	0	0	0	0.150943	0	0	NA	0.0357143	0	0	0	0
chr6.5087027	-13.5547	0.0355668	+	utr3	Cpg_island	PPP1R3G	NM_001145115	648791	1	0.678571	0.789474	1	0.870968	0.833333	NA	0.75	0.909091	0.75	1	0.753846	0.684211	0.733333	0.380952	0.788462	0.916667	0.714286	0.75	0.703704
chr6.5087071	-6.65421	0.0495295	+	utr3	South_shore	PPP1R3G	NM_001145115	648791	1	0.964286	0.894737	1	1	1	NA	1	1	1	1	0.836066	0.894737	1	1	0.865385	0.75	1	0.916667	1
chr17.5138980	-36.3283	0.0234701	-	promoter	intercpg	C17orf87	NM_207103	388325	1	NA	1	NA	1	1	1	1	0.25	1	1	0	1	0.9	0.4	1	NA	0.923077	0.272727	0.111111
chr5.5140598	-1.85616	0.0120519	+	promoter	Cpg_island	ADAMTS16	NM_139056	170690	0	0.0425532	0	0	0	0	NA	0	0	0	0.0306748	0	0	0	0	0	0	0	0	0
chr5.5140615	-1.15321	0.040001	+	promoter	Cpg_island	ADAMTS16	NM_139056	170690	0	0.0212766	0	0	0.0285714	0.0625	NA	0	0	0.0285714	0	0	0	0	0	0	0	0	0	0
chr18.5145470	-17.9753	0.0306098	-	utr3	intercpg	LOC642597	NM_001145194	642597	0.944444	0.8125	1	NA	0.785714	0.666667	NA	0.592593	0.769231	0.722222	0.722222	0.365079	0.742857	0.5	0.454545	0.606061	0.6	0.555556	0.909091	0.8125
chr19.5152301	7.71143	0.0416122	+	utr3	South_shore	KDM4B	NM_015015	23030	0	0	0	0.0461538	0	0	0	0	0	0	0	0.390805	0.0169492	0	0	0.23913	0	0.0357143	0.030303	0
chr12.5153225	4.41847	0.0367851	+	utr5	Cpg_island	KCNA5	NM_002234	3741	0	0.0416667	0	0	0	0	0	0	0	0.04	0	0.125	0	0.214286	NA	0	0	0	0.0625	0.0857143
chr12.5153253	3.20478	0.0199654	+	utr5	Cpg_island	KCNA5	NM_002234	3741	0	0	0	0	0	0	0	0	0	0	0	0.125	0	0	0	0	0	0	0.133333	0.0285714
chr19.5153271	-20.7237	0.00549712	+	utr3	South_shore	KDM4B	NM_015015	23030	1	1	NA	1	1	NA	1	1	1	0.666667	1	0.758621	0.888889	0.714286	1	0.5	0.727273	1	NA	0.714286
chr17.5184649	8.86125	0.00354009	+	promoter	North_shore	RABEP1	NM_004703;NM_001083585	9135	0.903226	1	1	NA	0.870968	0.818182	1	1	0.777778	0.933333	0.898551	1	1	1	1	1	1	0.846154	1	1
chr9.5185755	-14.6	0.0103532	-	promoter	Cpg_island	INSL6	NM_007179	11172	1	1	0.8	NA	1	0.8	1	NA	0.95	0.9	0.942857	0.857143	0.952381	0.916667	0.222222	0.75	1	0.8	0.789474	0.714286
chr20.5296549	4.54894	0.0279913	+	promoter	Cpg_island	PROKR2	NM_144773	128674	NA	0	0	0	0	0	0	0	0	0	0	0.214286	0	0	0	0.0384615	0	0	0	0.129032
chr19.5340747	5.46312	0.0289684	+	utr5	Cpg_island	PTPRS	NM_130855;NM_130854;NM_002850;NM_130853	5802	NA	0	0	0	0	0	0	0	0	0	0	0	0	0	0	0.153846	0.3	0	0.0952381	0
chr7.5343573	23.7057	0.0286383	-	utr3	Cpg_island	SLC29A4	NM_001040661;NM_153247	222962	0.4	0.823529	0.25	0.6875	0.642857	NA	0.105263	NA	NA	0.6	0.454545	0.842105	0.9	0.857143	0.822222	0.823529	0.571429	0.8	0.75	0.181818
chr17.5403133	-28.2587	0.012487	-	utr3	Cpg_island	LOC728392	NM_001162371	728392	0.9375	0.612903	0.583333	0.666667	0.318182	0.428571	1	0.642857	0.285714	0.6	0.959184	0.645161	0.454545	0.25	0.545455	0.238806	0.105263	0.181818	0.357143	0.5
chr17.5404305	3.2349	0.0358259	+	utr5	Cpg_island	LOC728392	NM_001162371	728392	0	0.0338983	0	0	0	0.0232558	0	0	0	0	0.025974	0.101449	0.0222222	0.0212766	0.0612245	0.108108	0	0	0	0.0555556
chr17.5404499	11.8393	0.00245146	+	promoter	Cpg_island	LOC728392	NM_001162371	728392	0.0689655	0.106383	0	0	0	0	0	0	0	0.0357143	0	0.333333	0.115385	0.179487	0.0493827	0.222222	0.21875	0.0666667	0.0277778	0.0566038
chr17.5404508	7.05661	0.0182123	+	promoter	Cpg_island	LOC728392	NM_001162371	728392	0.0689655	0.0638298	0	0	0.12766	0	0	0	0	0	0	0.114943	0.0384615	0.0769231	0.0493827	0.222222	0.09375	0.0333333	0.0277778	0.188679
chr17.5404513	10.0119	0.00773983	+	promoter	Cpg_island	LOC728392	NM_001162371	728392	0.0689655	0.106383	0	0	0.12766	0	0	0	0	0	0	0.114943	0.115385	0.179487	0.0493827	0.222222	0.21875	0.0666667	0	0.188679
chr17.5404525	12.4402	0.00324105	+	promoter	Cpg_island	LOC728392	NM_001162371	728392	0.0689655	0.106383	0	0	0.12766	0	0	0	0	0.037037	0	0.333333	0.115385	0.179487	0.0493827	0.222222	0.21875	0.0666667	0.0588235	0.188679
chr17.5404560	8.92561	0.018736	+	promoter	Cpg_island	LOC728392	NM_001162371	728392	0.0689655	0.0869565	0	0	0.12766	0	0	0	0	0	0	0.337209	0.0769231	0.0263158	0.0493827	0.194444	0.0967742	0.0666667	0.0277778	0.132075
chr17.5404563	12.8084	0.00232996	+	promoter	Cpg_island	LOC728392	NM_001162371	728392	0.0689655	0.0869565	0	0	0.12766	0	0	0	0	0	0	0.333333	0.113208	0.179487	0.0493827	0.222222	0.225806	0.0666667	0.0555556	0.132075
chr17.5404586	10.5741	0.0134834	+	promoter	Cpg_island	LOC728392	NM_001162371	728392	0.0689655	0.106383	0	0	0.12766	0	0	0	0	0	0	0.333333	0.113208	0.179487	0.0493827	0.138889	0.21875	0.0333333	0	0.132075
chr10.5407147	-17.3327	0.00135588	+	utr5	intercpg	UCN3	NM_053049	114131	0.368421	0.416667	0.5	NA	0.371429	0.333333	0.857143	0.636364	0.45	0.285714	0.376068	0.25	0.142857	0.333333	0.0666667	0.290323	0.666667	0.0555556	0.142857	0.294118
chr20.5485327	-15.0771	0.0486238	-	promoter	intercpg	LOC149837	NR_015406	149837	0	0.333333	0.2	0	0	0	1	0.0526316	0.4	0.1	0	0	0	0	0	0.277778	0	0	0	0
chr18.5489012	9.61261	0.0377292	+	utr5	intercpg	EPB41L3	NM_012307	23136	0.0526316	0.153846	0	NA	0.2	0.105263	0	0	0.0769231	0.15	0	0.25	0.2	0.111111	0.0263158	0.242424	0.176471	0.210526	0.210526	0.06
chr18.5489091	-36.3442	0.000284195	-	utr5	intercpg	EPB41L3	NM_012307	23136	0.5	0.25	0.6	0.846154	0.444444	0.333333	0.888889	0.636364	0.285714	0.25	0.384615	0	0.142857	0.222222	0.133333	0.09375	0.1	0.571429	0	0.142857
chr18.5489132	-20.6745	0.0160293	-	utr5	intercpg	EPB41L3	NM_012307	23136	0.45	0	0.6	0.730769	0.111111	0.285714	0	0.5	0.285714	0.3	0.0961538	0	0.125	0.111111	0	0.15625	0	0.428571	0	0.0952381
chr20.5492112	-10.4061	0.0212608	+	promoter	intercpg	-	-	-	1	0.918367	0.944444	1	0.930233	0.941176	1	0.973684	1	0.924528	0.763441	0.769231	1	0.829268	0.886792	0.791045	0.818182	0.8	0.964286	0.784314
chr7.5536234	-31.5527	0.0423872	+	promoter	South_shore	MIR589	NR_030318	693174	0.75	NA	NA	1	0.307692	0.714286	NA	0.5	0.521739	0.636364	1	0.340909	0.5	0.9	0	0	0.571429	0.4375	0.333333	0.75
chr7.5536802	8.54626	0.0372991	+	promoter	North_shelf	MIR589	NR_030318	693174	0	0	0	0	0	0	NA	0	0	0	0	0.302632	0	0	0	0.4	0	0	0	0.108108
chr10.5567502	18.3268	0.00297447	+	utr3	Cpg_island	CALML3	NM_005185	810	0.22	0.210526	0.3	0.4	0.275862	0.777778	0.181818	0.395349	0.232558	0.30303	0.189189	0.585714	0.434783	0.421053	0.666667	0.55	0.411765	0.333333	0.5	0.25
chr10.5567525	-7.26396	0.0407106	-	utr3	Cpg_island	CALML3	NM_005185	810	1	1	1	1	1	0.903226	NA	1	1	1	1	0.777778	NA	1	0.972222	0.914894	1	1	1	0.72093
chr10.5567531	16.6179	0.0323306	-	utr3	Cpg_island	CALML3	NM_005185	810	0.8	0.9	0.533333	0.5	0.72	0.806452	NA	1	1	0.333333	0.828125	1	NA	0.8	0.833333	0.787234	1	0.933333	1	1
chr10.5567552	4.36993	0.017064	+	utr3	Cpg_island	CALML3	NM_005185	810	0	0	0	0	0	0	NA	0	0	0	0	0	0	0	0.0967742	0.0909091	0	0	0	0.037037
chr19.5568032	4.28035	0.0191069	+	promoter	South_shore	PLAC2	NR_027064	257000	0	0	0.0909091	0	0	0	NA	0	0	0	0	0	0	0	0	0.0909091	0.125	0	0.0769231	0.107143
chr20.5592119	17.1915	0.0237672	+	promoter	South_shore	GPCPD1	NM_019593	56261	0.428571	0.8	0.7	0.421053	0.655172	0.727273	0.8	0.941176	0.84375	0.62069	0.440678	0.571429	0.882353	0.764706	1	0.909091	0.772727	0.73913	0.95	0.922078
chr18.5629549	1.8757	0.0378721	+	promoter	Cpg_island	-	-	-	0	0	0	0	0	0	0	0	0	0	0	0.0787402	0.0138889	0	0	0	0	0	0.0526316	0
chr18.5629869	-3.79596	0.0469934	-	promoter	Cpg_island	-	-	-	0	0.25	0	0	0	0.0869565	0	0.0769231	0	0	0	0	0	0	0	0	0	0	0	0
chr7.5661428	-18.4832	0.0282629	+	utr3	intercpg	RNF216	NM_207116;NM_207111	54476	0.777778	0.444444	0.363636	0.805556	0.85	0.833333	0.285714	0.9	0.583333	0.75	1	0.316667	0.594595	0.684211	0.459459	0.363636	0.466667	0.75	0.666667	0.666667
chr19.5681215	3.49091	0.0279892	+	promoter	Cpg_island	C19orf70	NM_205767	125988	0	0	0	NA	0	0	NA	0	0	0	0	0.235294	0	0	0	0.0151515	0	0	0	0.0555556
chr19.5681221	2.58661	0.00524741	+	promoter	Cpg_island	HSD11B1L	NM_198707;NM_198704;NM_198533;NM_198705;NM_198708;NM_198706	374875	0	0	0	NA	0	0	NA	0	0	0	0	0.111111	0	0	0	0.030303	0	0	0	0.0555556
chr10.5682262	7.72572	0.0198255	+	utr3	North_shore	ASB13	NR_024581;NR_037164;NM_024701	79754	1	0.727273	1	NA	1	0.888889	NA	1	1	0.916667	0.8125	1	1	1	1	1	1	1	1	1
chr10.5682613	-15.2965	0.00559155	+	utr3	North_shore	ASB13	NR_024581;NR_037164;NM_024701	79754	1	0.875	0.75	1	0.894737	0.866667	1	1	1	0.7	0.883721	0.83871	1	NA	0.777778	0.6	0.75	1	0.8	0.59375
chr19.5691984	22.5049	0.0382735	+	utr3	Cpg_island	LONP1	NM_004793	9361	NA	0.666667	0.625	0	0.702128	0.733333	0.45	0.555556	0.583333	0.75	0.580645	1	1	0.5	1	0.521739	0.818182	0.6	0.736842	0.625
chr19.5720215	3.27675	0.0328916	+	promoter	Cpg_island	LONP1	NM_004793	9361	0	0	0	0	0	0	0	0	0	0	0	0.130952	0	0.08	0	0	0	0	0.04	0
chr19.5784688	30.4428	0.0397662	+	utr5	North_shore	PRR22	NM_001134316	163154	NA	0.75	0.6	0	0.888889	0.833333	0	0.333333	1	0.538462	1	1	1	0.6	0.875	0.4	1	1	1	1
chr7.5821409	2.45033	0.0137759	-	promoter	Cpg_island	RNF216	NM_207116;NM_207111	54476	0	0	0	0	0	0	0	0	0	0	0	0.0746269	0.0454545	0	0	0	0	0	0.0526316	0
chr7.5821418	4.28451	0.00971864	+	promoter	Cpg_island	RNF216	NM_207116;NM_207111	54476	0	0	0	0	0	0	0	0	0	0.0454545	0	0.126316	0.0487805	0	0	0	0.0769231	0	0.0555556	0.0722892
chr7.5823013	-15.8719	0.00976286	-	promoter	South_shore	RNF216	NM_207116;NM_207111	54476	0.823529	0.5	0.529412	0.375	0.486486	0.666667	0.142857	0.555556	0.2	0.6	0.586207	0.428571	0.411765	0.333333	0.454545	0.25	0.266667	0.421053	0.217391	0.35
chr2.5831215	15.5227	0.00227214	+	promoter	Cpg_island	SOX11	NM_003108	6664	0	0	0	0	0.09375	0	0	0	0	0.1	0.0763359	0.0769231	0	0.2	0.372093	0.121212	0.238095	0	0.0625	0.387097
chr2.5831216	10.0211	0.00706487	-	promoter	Cpg_island	SOX11	NM_003108	6664	0.2	0	0	0	0.04	0.111111	0	0	0.133333	0	0	0.173913	0.125	0.285714	0.0769231	0.0810811	0.0769231	0.1	0	0.137931
chr2.5831269	7.33842	0.0359113	-	promoter	Cpg_island	SOX11	NM_003108	6664	NA	NA	0	0	0	0	NA	0	0	0	0	0.171429	0	0.2	0	0.15625	NA	0	0	0
chr2.5832112	2.21004	0.0225876	+	promoter	Cpg_island	SOX11	NM_003108	6664	0	0	0	0	0	0	0	0	0	0	0	0.0416667	0	0	0	0	0.105263	0	0.0740741	0
chr2.5832867	3.58389	0.0287045	+	promoter	Cpg_island	SOX11	NM_003108	6664	0	0	0	NA	0	0	0	0	0	0	0	0.173913	0	0	0	0	0	0	0.0392157	0.0298507
chr2.5833132	1.59893	0.0340871	+	promoter	Cpg_island	SOX11	NM_003108	6664	0	0	0	0	0	0	0	0	0	0	0	0.010101	0	0	0	0	0.078125	0	0	0.047619
chr2.5833143	0.910521	0.0340238	+	promoter	Cpg_island	SOX11	NM_003108	6664	0	0	0	0	0	0	0	0	0	0	0	0.010101	0	0	0	0.0526316	0.03125	0	0	0
chr2.5836787	2.81344	0.0309813	+	utr3	Cpg_island	SOX11	NM_003108	6664	0	0	0	0	0	0	0	0	0	0	0	0.12	0	0	0.0196078	0	0.0454545	0	0	0
chr2.5836794	3.2696	0.028377	+	utr3	Cpg_island	SOX11	NM_003108	6664	0	0	0	0	0	0	0	0	0	0	0	0.102564	0.0833333	0	0	0	0	0.0769231	0	0
chr19.5838760	-21.3077	0.0176387	+	utr5	intercpg	FUT6	NM_000150;NM_001040701	2528	0.428571	0.15	0	0	0.142857	0.5	0.714286	0.7	0.666667	0.210526	0.538462	0.05	0.114286	0.375	0.0588235	0	0.166667	0	0.04	0.25
chr4.5890079	1.69443	0.0200263	+	promoter	Cpg_island	CRMP1	NM_001313;NM_001014809	1400	0	0	0	0	0	0	0	0	0	0	0	0.0571429	0.0588235	0	0	0.0192308	0	0	0	0
chr4.5890095	1.93943	0.017248	+	promoter	Cpg_island	CRMP1	NM_001313;NM_001014809	1400	0	0	0	0	0	0	0	0	0	0	0	0.047619	0	0	0	0.0588235	0	0	0.04	0
chr19.5892038	-10.0885	0.0382499	+	utr3	North_shore	NDUFA11	NM_001193375	126328	0	0.111111	0	0.304348	0	0.333333	NA	0	0.0714286	0.142857	0.368421	NA	0.047619	0	0	0	0.125	0	0	0
chr4.5892101	3.11755	0.038833	+	promoter	Cpg_island	CRMP1	NM_001313;NM_001014809	1400	0	0	0	NA	0	0	0	0	0	0	0	0	0	0	0.0714286	0	NA	0	0	0.142857
chr20.5892161	6.49222	0.0116082	-	utr5	Cpg_island	CHGB	NM_001819	1114	0	0	0	0	0	0	0	0	0	0	0	0.125	0	0.166667	0.157895	0	0	0	0.142857	0
chr19.5892646	6.07892	0.0136319	+	utr3	South_shore	NDUFA11	NM_001193375	126328	0	0.030303	0	0	0	0	0	0	0	0	0.0882353	0	0.0227273	0.105263	0.0704225	0.0909091	0.0434783	0.0322581	0	0.277778
chr19.5892726	32.018	0.00222297	+	utr3	South_shore	NDUFA11	NM_001193375	126328	0	0.1875	0.166667	NA	0	0	0	0.0625	0.2	0.181818	0	0.387097	NA	0.666667	0.881356	0.102564	0.285714	0	0.34375	0.5
chr4.5894722	-3.52917	0.0206638	-	utr5	Cpg_island	CRMP1	NM_001313;NM_001014809	1400	NA	0.0357143	0	0	0	0.0769231	0	NA	0	0.0769231	0.0608696	0	0.0344828	0	0	0	0	0	0	0
chr4.5894794	3.43662	0.0101767	-	utr5	Cpg_island	CRMP1	NM_001313;NM_001014809	1400	NA	0	0	0	0	0	0	NA	0	0	0	0.117647	0.0344828	0	0	0	0.03125	0	0.05	0
chr4.5894813	7.0632	0.0290087	+	promoter	Cpg_island	CRMP1	NM_001313;NM_001014809	1400	0	NA	0	NA	0	0	NA	0	0	0	0	0.142857	0	0	0.142857	0	0.25	NA	0	0
chr19.5905080	3.7392	0.027716	-	promoter	Cpg_island	NDUFA11	NM_001193375;NR_034166;NM_175614	126328	0	0	0	0	0	0	0	0	0	0	0	0.117647	0	0	0	0.15	0	0	0	0.0909091
chr10.5931055	3.30882	0.0233584	+	promoter	Cpg_island	TRMT6	NM_015939	51605	0	0	0	0	0	0	NA	0	0	0	0	NA	0.0487805	0.0714286	0	0	0	0	0.0909091	0
chr10.5933617	4.72122	0.0317213	-	promoter	South_shore	ANKRD16	NM_001009943;NM_001009941;NM_019046	54522	0	0	0	0	0	0	0	0	0	0	0	0.166667	0	0.0909091	0	0.025641	0	NA	0	0
chr10.5933635	-21.7751	0.0182674	+	promoter	South_shore	FBXO18	NM_178150;NM_032807	84893	1	0.818182	1	1	1	0.777778	1	0.428571	1	0.833333	1	0.842105	1	0.571429	0.794872	0.47619	0.777778	NA	0.363636	0.88
chr19.5978324	0.844939	0.043544	-	promoter	Cpg_island	RANBP3	NM_007322;NM_003624;NM_007320	8498	0	0	0	0	0	0	0	0	0	0	0	0.0208333	0	0	0	0	0	0	0.0454545	0
chr19.5978337	0.934293	0.0243001	-	promoter	Cpg_island	RANBP3	NM_007322;NM_003624;NM_007320	8498	0	0	0	0	0	0	0	0	0	0	0	0.0192308	0	0	0	0.04	0	0	0	0.030303
chr17.5983930	14.4264	0.0452252	-	utr5	intercpg	WSCD1	NM_015253	23302	0.75	0.40625	0.181818	0.545455	0.547945	0.675676	0.666667	0.789474	0.302326	0.434783	0.530488	0.6	0.6875	0.636364	0.928571	0.615385	0.8	0.5	0.571429	0.719298
chr10.5994995	-18.3533	0.0355957	-	utr3	intercpg	IL15RA	NM_002189;NR_033494;NM_172200	3601	0.862069	0.666667	0.3	1	0.674419	0.5625	0.47541	0.483871	0.638889	0.409091	0.712644	0.382979	0.673077	0.53125	0.470588	0.116667	0.545455	0.5	0.466667	0.325581
chr10.5995052	21.1053	0.0336653	+	utr3	intercpg	IL15RA	NM_002189;NR_033494;NM_172200	3601	0.431373	0.607143	0.414634	0.876712	0.666667	0.4375	0	0.421053	0.611111	0.333333	0.744681	0.907407	0.75	0.6875	0.828571	0.483871	0.818182	0.578947	0.615385	0.844828
chr6.6004125	2.90103	0.0376436	+	utr5	Cpg_island	NRN1	NM_016588	51299	0	0	0	NA	0	0	0	0	0	0	0	0	0.0344828	0.0294118	0.162162	0	0	0	0	0
chr6.6004238	19.8487	0.028425	-	utr5	Cpg_island	NRN1	NM_016588	51299	0	0	0	NA	0	0	0	NA	0.111111	0.111111	0	0.565217	1	NA	0.333333	0	0.133333	0	0	0.125
chr6.6004253	-6.76126	0.0386571	-	utr5	Cpg_island	NRN1	NM_016588	51299	0	0.0833333	0.333333	0.145833	0	0	0	0.0833333	0.15	0.0833333	0.15942	0	0.148148	0	0	0	0	0.0909091	0	0.0322581
chr6.6004324	0.981851	0.0444406	-	promoter	Cpg_island	NRN1	NM_016588	51299	0	0	0	0	0	0	0	0	0	0	0	0.0214286	0	0	0.0181818	0	0	0	0	0
chr6.6004328	2.02971	0.0344778	+	promoter	Cpg_island	NRN1	NM_016588	51299	0	0	0	0	0	0	0	0	0	0	0	0.0952381	0.0285714	0	0	0	0	0.03125	0	0
chr7.6010251	-19.4801	0.0072572	+	utr5	Cpg_island	RSPH10B2	NM_001099697	728194	0.12	0.315789	0.2	NA	0.470588	0.375	NA	0.615385	0.333333	0.529412	0.515873	0.333333	0.16	0.263158	0.05	0.0714286	0.333333	0.333333	0.222222	0.272727
chr10.6019459	-1.02004	0.0293216	-	utr5	Cpg_island	IL15RA	NM_002189;NR_033494;NM_172200	3601	0.0212766	0.0263158	0	NA	0	0	0	0	0	0	0.0127389	0	0	0	0	0	0	0	0	0
chr1.6021948	3.85283	0.0231194	+	utr5	intercpg	LRRN4	NM_152611	164312	0	0	0	0	0	0	0	0	0	0	0	0.037037	0	0	0	0.142857	0.12	0	0	0
chr1.6046227	-28.1132	0.00957716	+	utr5	intercpg	NPHP4	NM_015102	261734	1	0.588235	NA	1	0.7	NA	1	0.692308	0.357143	0.625	1	0.658537	0.6	0.457143	0.375	0.8	0.470588	0.47619	0.416667	0.55
chr1.6046233	-28.0929	0.00508739	-	utr5	intercpg	NPHP4	NM_015102	261734	1	0.625	1	1	0.958333	0.833333	1	0.9	0.714286	0.555556	1	0.843373	0.75	0.571429	0.0833333	0.62069	0.666667	0.5	NA	0.75
chr1.6046264	27.1229	0.0158399	-	utr5	intercpg	NPHP4	NM_015102	261734	0.6	0.375	0.666667	0	0.423077	0.5	0	0.9	0.142857	0.555556	0.666667	0.626506	0.85	0.857143	0.833333	0.62069	0.5	0.8125	NA	0.666667
chr1.6046344	25.888	0.0232604	-	utr5	intercpg	NPHP4	NM_015102	261734	0.6	0.5	0.533333	0	0.375	0.5	0	0.111111	0.666667	0.444444	0.166667	0.670732	0.333333	0.833333	0.666667	0.689655	1	0.3125	NA	0.5
chr1.6053193	2.08103	0.0253539	-	promoter	South_shore	NPHP4	NM_015102	261734	0	0	0	0	0	0	0	0	0	0	0	0.0483871	0	0	0	0	0.117647	0.037037	0	0
chr12.6054410	7.93037	0.0172843	-	utr5	intercpg	ANO2	NM_020373	57101	0	0	0	0	0	0	0	0	0.05	0	0.0673077	0	0	0	0.210526	0.108696	0.121212	0.142857	0.047619	0.233333
chr12.6054444	5.92457	0.0107318	-	promoter	intercpg	ANO2	NM_020373	57101	0.0517241	0	0	0	0	0	0	0	0	0	0.00961539	0	0	0	0.117647	0.111111	0.0923077	0.121951	0.0487805	0.152542
chr16.6069556	2.08534	0.046568	+	utr5	Cpg_island	RBFOX1	NM_018723;NM_001142333	54715	0	0	0	0	0	0	0	0	0	0	0	0	0	0	0	0.0869565	0	0.0625	NA	0
chr1.6094737	6.58544	0.0128495	-	utr5	intercpg	KCNAB2	NM_172130;NM_001199861;NM_003636;NM_001199860	8514	0	0	0	0	0	NA	NA	0	NA	0	0	0.295455	0	0	0	0.0689655	0.0357143	0	0	0.08
chr20.6103858	4.12554	0.0345069	-	utr5	Cpg_island	FERMT1	NM_017671	55612	0	0	0	0	0	0	NA	0	0	0	0	0	0	0.0434783	0	0	0	0	0.130435	0.2
chr10.6104204	-7.87291	0.0196131	+	utr5	intercpg	IL2RA	NM_000417	3559	1	NA	1	1	1	1	NA	1	0.894737	0.875	1	0.897959	0.857143	0.6	0.929577	0.9	1	NA	1	0.90625
chr10.6185964	-24.2067	0.017743	-	promoter	North_shore	PFKFB3	NM_001145443	5209	1	0.875	0.833333	1	0.846154	0.833333	1	NA	0.583333	1	1	0.565217	0.714286	0.625	1	0.2	0.6875	NA	0.846154	0.4
chr10.6186017	5.43512	0.0279821	+	promoter	North_shore	PFKFB3	NM_001145443	5209	1	0.913043	1	NA	1	NA	0.75	1	0.818182	0.95	1	1	1	NA	1	1	1	1	1	1
chr10.6187717	3.57341	0.011557	+	promoter	Cpg_island	PFKFB3	NM_001145443	5209	0	0	0	0	0	0	0	0	0.0555556	0	0	0.0632911	0.0217391	0.025641	0	0	0.0588235	0.125	0.0333333	0.0714286
chr10.6187729	6.81565	0.00284035	+	promoter	Cpg_island	PFKFB3	NM_001145443	5209	0	0.0416667	0	0	0	0	0	0	0.111111	0	0	0.139241	0.0652174	0.0769231	0	0.0731707	0.117647	0	0.1	0.0714286
chr4.6202694	1.57304	0.0274959	+	promoter	Cpg_island	JAKMIP1	NM_001099433;NM_144720	152789	0	0	0	0	0	0	0	0	0	0	0	0.0133333	0	0.0714286	0	0.0645161	0	0	0	0
chr7.6203865	-11.8089	0.0177251	+	utr3	North_shore	CYTH3	NM_004227	9265	1	0.909091	1	NA	1	0.888889	NA	1	0.904762	1	1	0.666667	0.8	1	0.7	1	0.818182	1	0.916667	0.823529
chr7.6203866	-13.5248	0.0233557	-	utr3	North_shore	CYTH3	NM_004227	9265	0.714286	1	1	1	0.926829	1	1	1	1	0.75	1	0.804878	0.666667	1	1	0.75	0.769231	NA	0.916667	0.75
chr19.6211163	26.8653	0.0267646	-	utr3	North_shore	MLLT1	NM_005934	4298	0.615385	0.8	0.5	NA	0.733333	0.375	NA	NA	0.6	0.714286	0.565217	0.434783	NA	0.5	1	0.666667	1	1	1	1
chr19.6212239	7.24684	0.0122213	+	utr3	Cpg_island	MLLT1	NM_005934	4298	1	0.916667	0.833333	NA	1	0.875	1	0.666667	0.875	1	1	1	1	1	1	1	1	NA	1	1
chr19.6212240	-22.8039	0.0230081	-	utr3	Cpg_island	MLLT1	NM_005934	4298	1	0.727273	1	1	0.714286	0.857143	1	0.7	0.73913	1	1	0.714286	1	0.6	0.333333	0.461538	0.571429	1	1	0.483871
chr19.6212800	-5.78037	0.020072	+	utr3	Cpg_island	MLLT1	NM_005934	4298	1	0.842105	1	1	1	1	1	1	1	0.9	1	0.884615	1	0.857143	0.925926	0.953488	0.95	0.944444	1	1
chr1.6240340	2.44567	0.0256736	+	promoter	Cpg_island	CHD5	NM_015557	450091	0	0	0	0	0	0	0	0	0	0	0	0.0517241	0	0	0.0952381	0	0	0	0	0
chr1.6240747	5.86446	0.0122882	+	promoter	Cpg_island	CHD5	NM_015557	450091	NA	0	0	0	0	0	NA	0	0	0	0	0.117647	0.0909091	0	0	0	0.25	0.1	0	0
chr1.6266280	7.7586	0.00753583	-	promoter	Cpg_island	RNF207	NM_207396	388591	0	0	0	0	0	0	0	0	0	0.0714286	0	0.162791	0	0.2	0.135135	0.153846	0	0.125	0	0
chr1.6266287	3.73375	0.024362	-	promoter	Cpg_island	RNF207	NM_207396	388591	0	0	0	0	0	0	0	0	0	0	0	0.195122	0	0	0	0.0588235	0	0.0526316	0	0
chr1.6266515	6.49282	0.0420657	-	promoter	Cpg_island	RNF207	NM_207396	388591	0	0.0322581	0.08	0.030303	0.027027	0.0666667	0	0.05	0.0434783	0.0869565	0.0826446	0.26087	0.0285714	0.0487805	0.282051	0.137931	0.117647	0	0.0645161	0.0588235
chr1.6266744	6.57294	0.0174871	-	promoter	Cpg_island	RNF207	NM_207396	388591	0	0	0	0.0217391	0.0526316	0.0833333	NA	0	0	0.111111	0.0232558	0.0634921	0	0.0769231	0.142857	0.170732	0.0952381	0.0588235	0.266667	0
chr1.6266941	-20.2152	0.0283654	-	promoter	North_shore	RNF207	NM_207396	388591	0.958333	0.730769	1	1	0.65625	NA	NA	0.555556	0.636364	0.9375	0.777778	0.8	0.548387	0.619048	0.666667	0.823529	0.7	0.636364	0.375	0.217391
chr10.6274913	-15.4891	0.0342788	-	utr3	intercpg	PFKFB3	NM_004566;NM_001145443	5209	0.833333	0.693878	0.744186	0.923077	0.774194	0.818182	NA	1	0.520833	0.519231	0.685714	0.663636	0.483871	0.738095	0.442623	0.8125	0.511628	0.685714	0.608696	0.485714
chr10.6274917	13.7712	0.0340292	+	utr3	intercpg	PFKFB3	NM_004566;NM_001145443	5209	0.909091	0.78125	0.8125	1	0.785714	NA	0.526316	0.727273	0.75	0.8	0.5	1	0.774194	0.875	1	0.95	1	0.777778	1	0.885714
chr1.6296634	-29.2767	0.0233903	+	promoter	South_shore	ICMT	NM_012405	23463	0.727273	0.6	0.5	1	1	NA	NA	0.166667	1	0.769231	NA	0.615385	0.4	0.4	0.393939	0.357143	0.6	NA	0.2	0.444444
chr1.6296645	13.6035	0.00495613	+	promoter	South_shore	ICMT	NM_012405	23463	0.0588235	0.125	0	0	0.157895	0.285714	0	0.0322581	0.230769	0.107143	0.179487	0.111111	0.142857	0.142857	0.258621	0.333333	0.272727	0.214286	0.125	0.333333
chr1.6296653	15.3693	0.0393621	+	promoter	South_shore	ICMT	NM_012405	23463	NA	0.315789	0.333333	0.533333	0.333333	0.2	0	0.0526316	0.25	0.466667	0.210526	0.4	0.454545	0.333333	0.6	0.368421	0.5	0.333333	0.363636	0.444444
chr1.6297762	9.9549	0.00722211	+	promoter	South_shore	ICMT	NM_012405	23463	0.25	0.385417	0.254902	0.252632	0.380952	0.35	0.0588235	0.219178	0.37931	0.297872	0.259259	0.455814	0.318408	0.481481	0.359116	0.385246	0.361111	0.411765	0.439024	0.301587
chr1.6309274	2.61008	0.0400154	+	utr3	Cpg_island	GPR153	NM_207370	387509	0	0	0	0	0	0	0	0	0	0.0263158	0	0.0724638	0	0.0740741	0	0	0	0	0.0540541	0.0731707
chr1.6309374	12.5884	0.0348137	-	utr3	Cpg_island	GPR153	NM_207370	387509	0	0	0	NA	0.0833333	0	NA	0	0.111111	0	0	0.75	0	0.285714	0	0.0740741	0.0909091	0.125	0.272727	0
chr1.6309378	12.2939	0.0388044	-	utr3	Cpg_island	GPR153	NM_207370	387509	0.25	0	0	NA	0.0833333	0	NA	0	0	0	0	0.625	0	0	0	0.0740741	0.0909091	0.125	0.272727	0.3
chr12.6309516	2.41656	0.0121572	-	utr5	Cpg_island	CD9	NM_001769	928	0	0	0	0	0	0	0	0	0	0	0	0	0.0512821	0	0	0	0.0384615	0.0769231	0.078125	0
chr1.6322833	-22.3801	0.0132097	+	promoter	South_shore	GPR153	NM_207370	387509	0.96	0.7	0.428571	1	0.526316	0.875	0.333333	0.571429	0.5625	0.4	0.756098	0.566667	0.4	0.294118	0.424242	0.529412	0.555556	0.428571	0.333333	0.615385
chr17.6329899	-15.9446	0.0342467	+	utr3	intercpg	AIPL1	NM_001033054;NM_001033055;NM_014336	23746	1	NA	1	NA	1	0.8	NA	1	1	0.8125	0.8	0.4	0.814815	0.9375	0.4	NA	0.909091	0.916667	0.733333	0.913043
chr19.6333642	-6.65878	0.0489496	-	promoter	intercpg	ACER1	NM_133492	125981	1	1	0.916667	1	0.947368	1	1	1	1	1	NA	0.733333	NA	1	0.935484	0.962963	1	1	0.857143	1
chr19.6334348	19.2062	0.00822566	+	promoter	intercpg	ACER1	NM_133492	125981	1	0.571429	0.785714	0.272727	0.551724	0.666667	NA	0.545455	0.833333	0.807692	0.787879	0.882353	0.871795	0.90625	0.868421	0.980392	1	0.923077	0.6	1
chr17.6338555	-14.2884	0.0336417	-	promoter	intercpg	AIPL1	NM_001033054;NM_001033055;NM_014336	23746	1	0.8	1	NA	1	0.8	NA	0.916667	0.875	NA	1	1	0.714286	NA	0.692308	0.771429	0.833333	1	0.8	0.5625
chr17.6338922	16.849	0.0319747	+	promoter	intercpg	AIPL1	NM_001033054;NM_001033055;NM_014336	23746	0.923077	1	0.625	0.666667	0.903226	0.888889	0	0.75	1	1	0.86	0.981481	1	NA	1	0.979167	1	1	1	0.829787
chr17.6347498	0.826169	0.0418966	+	promoter	Cpg_island	FAM64A	NM_001195228;NM_019013	54478	0	0	0	0	0	0	0	0	0	0	0	0	0	0	0.015625	0	0	0.03125	0	0.025
chr17.6358472	34.4786	0.00974799	+	utr3	Cpg_island	PITPNM3	NM_001165966;NM_031220	83394	0	0.538462	NA	0	0.307692	0.285714	0	0	0.285714	0	0.492308	0.636364	0.125	0.6	0.727273	0.230769	0.909091	0.3	0.434783	0.705882
chr17.6358475	36.0161	0.00856888	+	utr3	Cpg_island	PITPNM3	NM_001165966;NM_031220	83394	0	0.461538	NA	0	0.538462	0.428571	0	0	0.5	0.111111	0.415385	1	0.25	0.3	0.727273	0.538462	0.636364	0.5	0.521739	0.705882
chr19.6375074	-15.917	0.0219711	+	utr3	South_shore	ALKBH7	NM_032306	84266	0.666667	0.758621	0.758621	1	0.707317	0.6	1	0.380952	0.730769	0.852941	0.89011	0.724138	0.4	0.62963	0.64	0.666667	0.608696	0.714286	0.62963	0.666667
chr19.6375260	-11.5434	0.00102198	-	utr3	South_shore	ALKBH7	NM_032306	84266	1	1	1	1	1	1	1	1	1	1	1	0.909091	0.95	0.736842	0.631579	1	0.941176	1	1	0.892857
chr19.6376609	-17.299	0.0460915	-	promoter	South_Shelf	PSPN	NM_004158	5623	1	0.6	0.615385	1	0.64	0.571429	0.586207	0.6875	0.666667	0.611111	0.816667	0.606061	0.6	0.5	0.826087	0.684211	0.571429	0.5	0.5	0.25
chr9.6412025	-14.4163	0.00246979	-	promoter	North_shore	UHRF2	NM_152896	115426	1	0.923077	0.857143	1	0.95	1	1	1	1	1	1	0.75	NA	0.75	1	1	0.8	0.714286	0.866667	0.666667
chr9.6412470	-21.6975	0.016357	+	promoter	Cpg_island	UHRF2	NM_152896	115426	0.888889	0.461538	0.75	1	0.740741	0.75	NA	0.448276	0.333333	0.545455	0.493976	0.354839	0.333333	0.666667	0.352941	0.210526	0.367347	0.466667	0.512821	0.583333
chr19.6417995	-18.854	0.0368073	-	promoter	South_Shelf	KHSRP	NM_003685	8570	0	0.142857	0.2	1	0.441176	0.4	0.52	0.785714	0.0689655	0.227273	0.227273	0.078125	0.0740741	0.176471	0	0.232558	0.241379	0.181818	0.05	0.302326
chr19.6418004	-10.8992	0.0234935	-	promoter	South_Shelf	MIR3940	NR_037505	100500888	1	0.809524	0.88	1	0.914286	0.9	1	0.928571	0.758621	0.954545	1	0.8125	0.967742	0.894737	0.714286	0.744186	0.827586	0.5	0.826087	0.909091
chr1.6419081	24.9839	0.0205016	+	promoter	intercpg	ACOT7	NM_181866;NM_181865;NM_007274;NM_181864	11332	0.666667	0.357143	0.473684	0.727273	0.56	NA	0.16	0	NA	0.384615	0.25	0.769231	0.555556	0.636364	1	0.468085	0.428571	0.75	0.8	0.448276
chr1.6419094	23.6425	0.0408004	+	promoter	intercpg	ACOT7	NM_181866;NM_181865;NM_007274;NM_181864	11332	0.666667	0.285714	0.315789	0.727273	0.48	NA	0.12	0	NA	0.384615	0.15	0.538462	0.333333	0.636364	1	0.574468	0.285714	0.625	0.866667	0.344828
chr12.6419637	16.7955	0.0265001	-	promoter	Cpg_island	PLEKHG6	NM_018173;NM_001144856;NM_001144857	55200	0	0	0.2	0	0	0.0769231	0	0	0.125	0	0.204545	0.5625	NA	0	0.166667	0.266667	0.125	0.4	0	0.125
chr12.6419641	23.5786	0.00198287	-	promoter	Cpg_island	PLEKHG6	NM_018173;NM_001144856;NM_001144857	55200	0	0	0.2	0	0	0	0.272727	0	0.125	0.125	0	0.375	NA	0	0.166667	0.266667	0.25	0.4	0.333333	0.375
chr12.6419660	10.2746	0.0337996	-	promoter	Cpg_island	PLEKHG6	NM_018173;NM_001144856;NM_001144857	55200	0	0	0	0	0	0	0	0	0.25	0.125	0	0.0625	NA	0	0	0.0666667	0.4	0	0.333333	0.125
chr12.6419750	2.42503	0.0371323	+	promoter	Cpg_island	PLEKHG6	NM_018173;NM_001144856;NM_001144857	55200	NA	0	0	0	0	0	0	0	0	0	0	0	0.0555556	0	0	0.0833333	0	0.111111	0	0
chr12.6420108	5.92505	0.0457071	+	utr5	South_shore	PLEKHG6	NM_018173;NM_001144856;NM_001144857	55200	0	0	0.1	0	0	0	0	0	0.05	0	0	0.333333	0	0.0909091	0.16	0.025	0.0588235	0	0	0
chr19.6425738	14.7313	0.0349885	-	promoter	Cpg_island	KHSRP	NM_003685	8570	0.444444	0.290323	0.136364	0.047619	0.173913	0.214286	0	0	0.288889	0.188679	0.134615	0.277778	0.222222	0.464286	0.612903	0.305556	0.0833333	0.264706	0.236842	0.44
chr19.6441978	-4.83914	0.0430266	+	utr3	intercpg	SLC25A23	NM_024103	79085	1	0.928571	1	1	1	1	1	1	1	0.88	1	0.884298	1	0.954545	1	0.84375	0.965517	0.933333	0.95	1
chr1.6445804	2.16819	0.0345234	+	utr5	intercpg	ACOT7	NM_007274;NM_181864	11332	NA	0	0	0	0	0	0	0	0	0	0	0	0.0681818	0.0952381	0	0	0	0	0	0.0178571
chr1.6454520	6.56793	0.0277226	+	promoter	South_shore	ACOT7	NM_007274	11332	0	0	0	0	0	NA	0	NA	0	0	0	0.242424	NA	0	0.105263	0.08	0	0	0	0
chr19.6463349	-13.2974	0.0319214	+	promoter	North_shore	SLC25A23	NM_024103	79085	0.944444	0.857143	0.666667	1	1	0.5	NA	1	0.894737	0.947368	0.842105	0.888889	0.822222	0.8125	0.567568	0.5625	0.733333	0.916667	0.8	0.9
chr19.6464668	4.18296	0.0352091	+	utr5	Cpg_island	SLC25A23	NM_024103	79085	0	0	0.0666667	0	0.0666667	0	0	0	0	0	0	0.0882353	0.166667	0.1	0.0222222	0.06	0	0	0.047619	0
chr19.6464690	5.84927	0.0198528	-	utr5	Cpg_island	CRB3	NM_174881;NM_139161	92359	0	0	0.105263	0.028169	0	0	0	0	0	0	0	0.108696	0	0	0.257143	0.106557	0	0.0217391	0.0327869	0.0470588
chr4.6474013	5.48553	0.0249859	-	utr5	Cpg_island	PPP2R2C	NM_020416	5522	0	0	0	0	0	0	0	0	0	0	0	0.0909091	0	0.142857	0	0.25	0	0	0	0
chr4.6474024	3.819	0.0185707	-	utr5	Cpg_island	PPP2R2C	NM_020416	5522	0	0	0	0	0	0	0	0	0	0	0	0.0909091	0	0	0	0.0357143	0	0	0.166667	0
chr4.6474365	3.2073	0.0394003	+	promoter	Cpg_island	PPP2R2C	NM_020416	5522	0	0	0	0	0	0	0	0	0	0	0	0.166667	0.0555556	0	0	0	0	0.125	0	0
chr1.6480028	-1.50038	0.0481724	-	promoter	Cpg_island	ESPN	NM_031475	83715	0	0	0	NA	0	0	0	0	0.0555556	0	0.0267857	0	0	0	0	0	0	0	0	0
chr1.6480530	-1.31969	0.020339	+	promoter	Cpg_island	ESPN	NM_031475	83715	0	0	0.0344828	0	0.032967	0	0	0.015873	0	0.0689655	0	0	0	0	0	0	0	0	0	0
chr1.6480564	1.4447	0.0385764	+	promoter	Cpg_island	HES2	NM_019089	54626	0	0	0	0	0	0	0	0	0	0	0	0.09	0.0131579	0	0	0	0	0	0	0.0106383
chr1.6480688	3.12366	0.0226836	+	promoter	Cpg_island	ESPN	NM_031475	83715	0	0	0	0	0	0	0	0	0	0	0	0	0.030303	0	0	NA	0.1	0	0	0.0833333
chr1.6480917	9.00507	0.00573921	+	promoter	Cpg_island	ESPN	NM_031475	83715	0	0	0	0	0	0	0	0	0	0	0	0.163636	0	0	0.214286	0	0.222222	0	0.148148	0
chr1.6480929	8.50124	0.00747309	+	promoter	Cpg_island	ESPN	NM_031475	83715	0	0	0	0	0	0	0	0	0	0	0	0.245283	0	0	0.214286	0	0.111111	0	0.0714286	0
chr19.6481827	-17.9928	0.0340691	-	promoter	intercpg	DENND1C	NM_024898	79958	1	0.214286	0.2	0	0.105263	0	0.05	0.121212	0.111111	0	0.188889	0.344828	0	0	0	0	0	0.0555556	0	0
chr12.6493211	3.35509	0.0223686	-	utr5	Cpg_island	LTBR	NM_002342	4055	0	0	0	0	0	0	0	0	0	0	0	0	0.133333	0	0.102041	0	0	0	0	0.0454545
chr12.6493323	2.47623	0.0355015	-	utr5	Cpg_island	LTBR	NM_002342	4055	0	0	0	0	0	0	0	0	0	0	0	0	0	0	0	0.0263158	0.0322581	0	0	0.13253
chr12.6500403	14.2355	0.00706166	+	utr3	intercpg	LTBR	NM_002342	4055	0.266667	0.888889	NA	1	0.8	1	NA	1	0.888889	0.928571	1	1	1	1	1	1	1	1	1	1
chr19.6503387	-11.6723	0.0057561	+	promoter	South_shore	TUBB4	NM_006087	10382	1	0.88	0.846154	NA	0.923077	0.6	1	NA	1	1	0.9375	0.792683	0.83871	0.818182	0.789474	0.923077	1	0.857143	0.75	0.708333
chr11.6518529	9.53053	0.0338271	-	utr5	intercpg	DNHD1	NM_144666;NM_173589	144132	0	0.078125	0.109091	0	0.215385	0	0	0.0222222	0.172414	0.0714286	0	0.316667	0.134328	0.102564	0.0526316	0.238095	0.0754717	0.138889	0.226415	0
chr1.6520953	-14.5398	0.04035	+	utr3	Cpg_island	ESPN	NM_031475	83715	1	0.882353	1	1	0.909091	0.857143	1	1	0.7	0.857143	0.74	0.756757	0.851852	0.777778	1	0.56	0.444444	0.823529	0.6875	1
chr1.6520977	-18.013	4.93e-05	+	utr3	Cpg_island	ESPN	NM_031475	83715	1	0.866667	0.888889	1	1	0.857143	1	1	0.9	1	0.98	0.763158	0.777778	0.888889	1	0.84	0.555556	0.705882	0.6875	1
chr7.6525684	-13.1057	0.0195917	-	promoter	South_shore	KDELR2	NM_001100603;NM_006854	11014	0.9	0.823529	0.642857	1	0.869565	1	1	0.923077	1	0.84	0.927928	0.8	0.666667	0.6	0.935484	0.736842	0.944444	0.909091	0.55	0.777778
chr1.6526179	-19.5215	0.0490219	-	utr5	Cpg_island	TNFRSF25	NM_003790;NM_148967;NM_001039664;NM_148966;NM_148970;NM_148965	8718	1	0.53125	0.823529	0.45	0.653061	0.7	1	0.706897	0.5	0.757576	0.49	0.8	0.65	0.62069	0.5	0.435897	0.2	0.291667	0.5	0.653061
chr1.6526183	-28.702	0.00321421	-	utr5	Cpg_island	PLEKHG5	NM_001042663;NM_020631;NM_001042664;NM_001042665;NM_198681	57449	1	0.5625	0.705882	0.45	0.612245	0.7	0.72	0.931034	0.714286	0.666667	0.83	0.573333	0.65	0.551724	0.125	0.307692	0.423077	0.166667	0.55	0.673469
chr1.6526773	-14.795	0.0292521	-	promoter	South_shore	PLEKHG5	NM_001042663;NM_020631;NM_001042664;NM_001042665;NM_198681	57449	1	1	1	1	0.8	0.75	NA	1	0.793103	0.823529	1	1	0.666667	0.777778	0.842105	0.809524	0.8	0.4	1	0.7
chr7.6537334	-10.7453	0.0320517	-	utr3	intercpg	GRID2IP	NM_001145118	392862	1	0.814286	0.85	1	0.822581	0.8	1	0.869565	0.793103	0.842105	1	0.895833	0.773585	0.682927	0.769231	0.85	0.90625	0.703704	0.891892	0.914894
chr1.6545586	8.48988	0.0150788	-	promoter	South_shore	PLEKHG5	NM_001042663;NM_020631;NM_001042664;NM_001042665;NM_198681	57449	0.0958904	0	0	0	0	0	0	0	0.138889	0	0.00621118	0.211765	0	0.153846	0	0.25	0.0128205	0.0434783	0.0857143	0.160494
chr1.6545673	14.8271	0.0403965	-	promoter	South_shore	PLEKHG5	NM_001042663;NM_020631;NM_001042664;NM_001042665;NM_198681	57449	0	NA	0	0	0	NA	0	0	0	0.111111	0.0322581	0.545455	0	0.4	0	0.0625	0.2	0	NA	0.428571
chr1.6551052	10.876	0.0360652	-	promoter	Cpg_island	PLEKHG5	NM_001042663;NM_020631;NM_001042664;NM_198681	57449	0	0.2	0	NA	0.05	0.142857	0	0	0	0.181818	0.140351	0.26506	0.214286	0.0217391	0.147059	0.0416667	0.357143	0.2	0.0833333	0.294118
chr1.6557368	3.85402	0.00970263	-	promoter	North_shore	PLEKHG5	NM_001042663;NM_198681	57449	NA	0	0	NA	0	0	0	0	0	0	0	0.0243902	0.111111	0.0740741	0	0	0	0	0	0.153846
chr1.6557672	1.46564	0.0472492	+	promoter	Cpg_island	PLEKHG5	NM_001042663;NM_198681	57449	0	0	0	0	0	0	0	0	0	0	0	0	0	0	0	0	0.0285714	0	0	0.0645161
chr1.6558086	-25.5306	0.00803118	-	promoter	South_shore	PLEKHG5	NM_001042663;NM_198681	57449	1	0.53125	1	1	1	0.9	1	1	0.666667	0.772727	0.589041	0.904762	0.45	0.666667	0.62963	0.625	0.636364	0.6	0.875	0.647059
chr1.6558108	21.3623	0.0241303	+	promoter	South_shore	PLEKHG5	NM_001042663;NM_198681	57449	NA	0	0.333333	0	0.25	0.333333	0	0.0909091	0.363636	0.0666667	0.0357143	0.525424	0	0	0.230769	0.368421	0.75	0.285714	0.6	0.46875
chr1.6558497	-24.3278	0.00727027	+	promoter	South_shore	PLEKHG5	NM_001042663;NM_198681	57449	1	0.888889	0.823529	1	0.666667	0.857143	1	0.809524	0.529412	0.722222	0.707692	0.8	0.642857	0.263158	0.8	0.555556	0.631579	0.666667	0.5	0.290323
chr17.6559968	11.8736	0.0457521	+	promoter	Cpg_island	-	-	-	0	0	0	0	0	0	0	0	NA	0	0	0.826087	0.08	0	0	0	0	0	0	0.0666667
chr17.6560217	3.30789	0.0392226	-	promoter	Cpg_island	-	-	-	NA	0	0	0	0	0	0	0	0	0	0	0	0	0.166667	0	0	0.166667	0	0.0322581	0
chr1.6583563	9.51402	3.81e-05	+	utr3	intercpg	PLEKHG5	NM_198681	57449	0.025641	0	0.0208333	0	0.153846	NA	0.0204082	0	0	0.0526316	0	0.132653	0	0.166667	0.149533	0.12069	0	0	0	0.1
chr19.6591065	1.74493	0.0492603	+	utr5	Cpg_island	CD70	NM_001252	970	0	0	0	NA	0	0	NA	0	0	0	0	0.0769231	0	0.0344828	0	0	0	0	0.0384615	0
chr19.6592456	12.3419	0.034366	+	promoter	South_shore	CD70	NM_001252	970	0.972222	0.875	0.866667	0.4	0.867647	0.727273	0.38	0.785714	0.75	0.866667	0.623188	0.939597	0.888889	0.888889	0.869565	0.982759	0.885714	0.85	1	0.762712
chr17.6616987	3.01672	0.02953	-	promoter	Cpg_island	SLC13A5	NM_001143838;NM_177550	284111	0	0	0	0	0	0	0	0	0	0	0	0.0740741	0.129032	0.03125	0	0	0	0	0	0
chr17.6617220	2.03656	0.0288519	+	promoter	Cpg_island	SLC13A5	NM_001143838;NM_177550	284111	0	0	0	0	0	0	0	0	0	0	0	0	0	0.0384615	0.0196078	0	0	0	0.108108	0
chr17.6617319	3.29491	0.00329426	-	promoter	Cpg_island	SLC13A5	NM_001143838;NM_177550	284111	NA	0	0	0	0	0	0	0	0	0	0	0	0.0425532	0	0	0.0714286	0.0333333	0	0.0645161	0.0615385
chr7.6629052	11.082	0.0153613	-	promoter	North_shore	C7orf26	NM_024067	79034	NA	0.785714	0.666667	NA	0.787879	1	1	0.888889	1	0.933333	0.821918	0.857143	1	NA	1	1	0.9375	1	1	1
chr4.6641531	-11.1727	0.0413529	-	promoter	North_shore	MRFAP1	NM_033296	93621	1	0.923077	0.857143	1	0.96875	0.857143	NA	1	0.818182	0.888889	0.89011	1	0.888889	0.777778	0.906977	0.842105	0.625	0.714286	0.833333	0.473684
chr4.6642318	0.586436	0.0352258	-	utr5	Cpg_island	MRFAP1	NM_033296	93621	0	0	0	0	0	0	0	0	0	0	0	0.0102041	0	0	0.0130719	0	0	0	0	0
chr9.6645543	2.64527	0.0260964	-	utr5	Cpg_island	GLDC	NM_000170	2731	0	0	0	0	0	0	0	0	0	0	0	0	0.153846	0	0.0178571	0.0909091	0	0	0	0
chr9.6646858	-28.6333	0.00200443	+	promoter	South_shore	GLDC	NM_000170	2731	0.636364	0.666667	0.7	1	0.5	NA	NA	0.857143	0.857143	0.75	0.947368	0.307692	0.285714	NA	0.625	0.473684	0.666667	0.615385	0.7	0.411765
chr7.6655620	0.519846	0.0322447	-	utr5	Cpg_island	ZNF853	NM_017560	54753	0	0	0	0	0	0	0	0	0	0	0	0.0141509	0	0	0	0.0121951	0	0	0	0
chr7.6655685	2.69291	0.00173884	-	utr5	Cpg_island	ZNF853	NM_017560	54753	0	0	0	0	0	0	0	0	0	0	0	0.0357143	0	0	0	0	0	0	0	0.0526316
chr7.6655794	3.39068	0.0367121	+	utr5	Cpg_island	ZNF853	NM_017560	54753	0	0	0	0	0	0	0	0	0	0	0	0.170213	0	0.0277778	0.0172414	0	0	0	0	0
chr7.6662851	-17.8576	0.0419077	-	utr3	South_shore	ZNF853	NM_017560	54753	0.761905	0.482759	0.913043	1	1	0.9	1	0.884615	0.671642	0.6875	0.632	0.90625	0.361111	0.74359	0.756757	0.595238	0.461538	0.8	0.75	0.75
chr7.6662892	9.21293	0.0143301	+	utr3	South_shore	ZNF853	NM_017560	54753	0	0	0	0	0.0540541	0	0	0	0.133333	0.0434783	0	0.297872	0	0.0555556	0.118421	0.275	0	0.0833333	0.0434783	0.075
chr1.6663067	2.96206	0.0465887	-	promoter	Cpg_island	KLHL21	NM_014851	9903	0	0	0	0	0	0	0	0	NA	0	0	0.125	0	0	0	0.0833333	0	0	0	0
chr19.6664642	16.6687	0.00381972	+	utr3	intercpg	TNFSF14	NM_172014;NM_003807	8740	0.641026	0.692308	0.791667	0.961538	0.689655	1	1	0.736842	0.866667	0.842105	0.723077	1	0.75	1	1	1	1	1	1	0.885714
chr19.6664711	9.68201	0.00796869	+	utr3	intercpg	TNFSF14	NM_172014;NM_003807	8740	0.0243902	0.0714286	0	0.103448	0	0	0	0	0	0	0	0.324324	0.2	0	0.0769231	0.15	0.0625	0.0909091	0	0.0285714
chr12.6665543	4.90827	0.0278836	-	promoter	South_shore	IFFO1	NM_080730;NM_001039670;NM_001193457;NR_036467	25900	0	0.0588235	0	0	0.145455	0	0	0	0	0	0	0.0571429	0.0645161	0.0540541	0.0125	0	0.157895	0.133333	0.0555556	0.0285714
chr11.6676900	2.45158	0.0281085	-	utr5	Cpg_island	DCHS1	NM_003737	8642	0	0	0	0	0	0	0	0	0	0	0	0	0	0	0	0	0	0.0740741	0.0512821	0.097561
chr7.6677518	4.83176	0.0421681	+	utr5	Cpg_island	-	-	-	0	0	0	0	0	0	NA	0	0	0	0	0.269231	0.0869565	0.05	0	0	0	0	0	0
chr12.6678802	-21.4646	0.0052987	-	promoter	South_shore	NOP2	NM_001033714;NM_006170	4839	1	0.764706	0.846154	1	0.777778	NA	NA	0.857143	0.833333	0.823529	NA	0.627451	0.888889	0.555556	0.56	0.4	0.588235	0.8	0.857143	0.5
chr17.6679561	1.95466	0.0229337	+	utr5	Cpg_island	FBXO39	NM_153230	162517	0	0	0	0	0	0	0	0	0	0	0	0.0540541	0	0	0	0	0	0.0454545	0.0294118	0
chr17.6679580	3.37036	0.00175606	+	utr5	Cpg_island	FBXO39	NM_153230	162517	0	0	0	0	0	0	0	0	0	0	0	0.0416667	0.0425532	0.0384615	0	0	0	0.047619	0	0.0588235
chr7.6694380	-12.9641	0.0039123	+	utr3	Cpg_island	-	-	-	1	0.888889	1	1	0.911765	1	1	1	0.846154	1	0.978723	0.968254	NA	0.833333	0.730769	0.769231	0.777778	0.923077	0.722222	0.83871
chr7.6694386	3.49415	0.0248623	+	utr3	Cpg_island	-	-	-	0	0	0	0	0	0	0	0	0	0	0	0.0952381	NA	0	0	0	0.111111	0	0.0555556	0
chr1.6694810	-6.73209	0.0421346	-	utr3	intercpg	THAP3	NM_138350	90326	0	0	0.214286	0	0.138889	0.111111	0.173913	0	0.153846	0.0714286	0.191489	0	0.0526316	0.05	0	0	0.133333	0.111111	0.0416667	0
chr7.6695039	10.0264	0.0341015	-	utr3	Cpg_island	-	-	-	0.846154	0.608696	0.888889	0.947368	0.692308	0.9	0.787879	0.428571	0.857143	0.884615	0.847619	0.893333	0.909091	0.769231	0.969697	0.914286	0.833333	0.733333	0.95	0.980392
chr7.6695117	-10.2966	0.0467867	+	utr3	Cpg_island	-	-	-	NA	1	0.933333	1	0.717949	NA	1	NA	0.894737	1	1	0.904762	0.933333	0.916667	NA	0.7	0.842105	0.8	1	0.897436
chr11.6704982	2.72833	0.0352018	+	promoter	South_shore	MRPL17	NM_022061	63875	0	0	0	0	0	0	0	0	0	0	0	0.113208	0.047619	0	0.0222222	0	0	0	0	0
chr12.6716468	1.14271	0.0122068	+	promoter	Cpg_island	CHD4	NM_001273	1108	0	0	0	0	0	0	0	0	0	0	0	0.0131579	0	0.0465116	0	0	0	0	0	0.0188679
chr4.6717835	0.588628	0.0495706	+	promoter	North_shore	CNO	NM_018366	55330	0	0	0	0	0	0	0	0	0	0	0	0.0210526	0	0	0	0.0133333	0	0	0	0
chr9.6719702	32.074	0.0200044	-	promoter	South_Shelf	KDM4C	NM_001146696	23081	0.888889	0.666667	0.75	0	0.8	0.5	0.166667	0	0.625	0.75	0.472973	1	0.5	0.857143	NA	1	0.4	1	0.692308	0.727273
chr17.6735333	2.4151	0.0476345	-	promoter	intercpg	TEKT1	NM_053285	83659	0	0	0	NA	0	0	0	0	0	0	0	0.133333	0.0185185	0	0	0	0	0	0.037037	0
chr19.6737754	2.78015	0.030627	+	promoter	Cpg_island	TRIP10	NM_004240	9322	0	0	0	0	0	0	0	0	0	0	0	0.118644	0	0	0	0.0365854	0	0	0.0714286	0
chr12.6741230	-10.9848	0.0116026	+	promoter	intercpg	LPAR5	NM_020400;NM_001142961	57121	1	1	1	1	0.705882	1	1	1	0.9375	0.916667	0.961538	0.907895	0.7	0.95	0.857143	0.842105	0.909091	1	0.870968	0.821429
chr12.6741240	-12.6416	0.00744334	+	promoter	intercpg	LPAR5	NM_020400;NM_001142961	57121	1	1	1	1	0.970588	0.666667	1	1	0.9375	1	1	0.934211	0.65	0.7	1	0.947368	0.818182	0.571429	0.774194	1
chr12.6741298	13.9998	0.0191679	+	promoter	intercpg	LPAR5	NM_020400;NM_001142961	57121	0.306122	0.357143	0.432432	0.166667	0.316667	0.285714	0.370968	0.04	0.290323	0.314286	0.406593	0.426471	0.45	0.227273	0.596154	0.677966	0.5	0.5	0.310345	0.3125
chr12.6741327	21.1788	0.0390063	+	promoter	intercpg	LPAR5	NM_020400;NM_001142961	57121	0	0.392857	0.368421	0.107143	0.615385	0.75	0.44186	NA	0.466667	0.478261	0.369231	0.866667	0.5	0.25	0.548387	0.725	0.608696	0.6	0.333333	0.8
chr12.6741432	3.68046	0.0421859	+	promoter	intercpg	LPAR5	NM_020400;NM_001142961	57121	0	0	0	0	0	0	0	NA	0	0	0	0.183333	0.0166667	0.0833333	0	0	0	0	0	0
chr12.6756653	2.70121	0.0417403	+	promoter	Cpg_island	ACRBP	NM_032489	84519	0	0	0	0	0	0	0	0	0	0	0	0	0	0	0	0	0.0344828	0	0.0243902	0.162791
chr9.6757956	0.94363	0.0408923	+	utr5	Cpg_island	KDM4C	NM_001146696;NM_001146694;NM_015061;NM_001146695	23081	0	0	0	0	0	0	NA	0	0	0	0	0.028169	0	0	0	0	0	0	0.0277778	0
chr1.6761946	5.75084	0.021826	+	utr5	Cpg_island	DNAJC11	NM_018198	55735	0	0	0	0	0	0	0	0	0	0	0	0.282051	NA	0	0.0714286	0.0357143	0	0	0	0
chr19.6767439	8.29449	0.0145246	+	utr5	North_shore	SH2D3A	NM_005490	10045	0	0	NA	0	0	NA	NA	0	0	0	0	0.263158	0.0555556	0	0	0	0.2	0.2	0	0
chr12.6810322	8.74674	0.0121161	+	promoter	South_shore	C12orf53	NM_153685	196500	0	0	0	0	0	0	0	0	0	0	0	0.361111	0	0	0.0740741	0.03125	0.285714	0	0	0
chr12.6810332	5.33533	0.00631308	+	promoter	South_shore	C12orf53	NM_153685	196500	0	0	0	0	0	0	NA	0	0	0	0	0	0.166667	0.1	0.047619	0.0384615	0.285714	0	0	0
chr12.6810356	15.1633	0.0102057	+	promoter	South_shore	C12orf53	NM_153685	196500	0	0.176471	0.222222	0.125	0.0588235	0.111111	NA	0	0	0.1	0	0.188679	0.5	0	0.285714	0.192308	0.571429	0.0869565	0.25	0.129032
chr19.6857246	-9.06656	0.0101487	-	utr3	intercpg	VAV1	NM_005428	7409	NA	NA	0	0	0.25	0	NA	0.222222	0.111111	0	0.125	0	0	0	0	0	0	0	0	0
chr17.6898899	-21.9131	0.0404427	-	promoter	Cpg_island	ALOX12	NM_000697	239	0.352941	0.357143	0.47619	1	0.363636	0.5	NA	0.928571	0.368421	0.789474	0.912281	0.366667	0.571429	0.454545	0.275862	0.25	0.529412	0.625	0.2	0.421053
chr17.6898935	-19.1633	0.0169016	-	promoter	Cpg_island	ALOX12	NM_000697	239	0.764706	0.307692	0.275	0.5	0.181818	0.642857	NA	0.615385	0.285714	0.648649	0.300885	0.293103	0.0714286	0.272727	0.25	0.3125	0.117647	0.2	0.153846	0.513514
chr17.6899251	-15.0435	0.0200284	+	promoter	Cpg_island	ALOX12	NM_000697	239	0.333333	0.185185	0.0714286	0.533333	0.0930233	0.333333	0.0588235	0.142857	0.115385	0.176471	0.533835	0.196721	0.333333	0.027027	0	0.0925926	0.047619	0.037037	0.0681818	0
chr17.6899297	-10.2328	0.0165562	+	promoter	Cpg_island	ALOX12	NM_000697	239	0.0666667	0.148148	0	0.533333	0.0930233	0.25	0.0588235	0.0714286	0.08	0.147059	0.233083	0.133333	0.185185	0	0	0.037037	0	0	0.0465116	0.05
chr17.6899325	-10.6914	0.000613736	+	promoter	Cpg_island	ALOX12	NM_000697	239	0.0666667	0.111111	0	0.533333	0.0465116	0.0833333	0	0.0714286	0.153846	0.264706	0.195489	0.0327869	0	0.0540541	0.0238095	0.0185185	0	0.037037	0.0227273	0.0243902
chr17.6918069	1.24464	0.0430664	+	utr5	Cpg_island	C17orf49	NM_001142799;NM_001142798;NM_174893	124944	0	0	0	0	0	0	0	0	0	0	0	0	0.0714286	0	0	0	0	0.0909091	0.0285714	0
chr17.6921794	33.3443	0.0204238	+	promoter	North_shelf	MIR497	NR_030178	574456	NA	0.318182	0	NA	0.384615	NA	0	0.25	0.285714	0.428571	0.1	1	0.581395	0.75	NA	0.714286	0.2	0.666667	0.176471	0.25
chr17.6921801	24.541	0.0260247	+	promoter	North_shelf	MIR497	NR_030178	574456	NA	0.173913	0	NA	0.384615	NA	0	0.25	0.142857	0.142857	0.2	0.851852	0.488372	0.25	NA	0.714286	0.3	0.416667	0.176471	0.125
chr17.6921962	21.234	0.0354801	+	promoter	North_shelf	MIR195	NR_029712	406971	NA	0.227273	0	NA	0.461538	NA	0	0	0.142857	0.285714	0.4	0.407407	0.604651	0.25	NA	0.428571	0.1	0.666667	0.352941	0.333333
chr17.6925682	1.73487	0.0417677	-	promoter	Cpg_island	BCL6B	NM_181844	255877	0	0.0217391	0	0	0	0	0	0	0	0.0181818	0	0.0458716	0.0192308	0.0540541	0	0	0	0	0.0612245	0.0172414
chr12.6931058	2.65898	0.025214	+	utr5	North_shelf	GPR162	NM_019858;NM_014449	27239	0	0	0	0	0	0	0	0	0	0	0	0.114286	0	0.0416667	0	0	0	0.0606061	0	0
chr12.6935941	-11.3137	0.0183883	+	promoter	North_shore	GPR162	NM_019858;NM_014449	27239	1	0.863636	1	NA	0.913043	NA	1	0.789474	0.714286	0.928571	0.736842	0.857143	0.846154	0.689655	0.857143	0.864865	0.68	0.904762	0.740741	0.8
chr17.6946958	1.43237	0.0493482	-	utr5	Cpg_island	SLC16A11	NM_153357	162515	NA	0	0	0	0	0	0	0	NA	0	0	0.027027	0	0	0	0	0	0	0.0714286	0
chr17.6946960	1.42581	0.0498129	-	utr5	Cpg_island	SLC16A11	NM_153357	162515	NA	0	0	0	0	0	0	0	NA	0	0	0.027027	0	0	0	0	0	0	0.0714286	0
chr17.6946965	1.22856	0.0332657	+	utr5	Cpg_island	SLC16A11	NM_153357	162515	0	0	0	0	0	0	0	0	0	0	0	0.0384615	0.0416667	0	0	0	0	NA	0	0
chr17.6947289	3.67248	0.0182904	-	promoter	Cpg_island	SLC16A11	NM_153357	162515	0	0	NA	0	0	0	0	0	0	0	0.025641	0.0454545	0.0405405	0	0.0784314	0	0	0.0625	0	0.181818
chr12.6976948	0.702219	0.029635	-	promoter	Cpg_island	TPI1	NR_027483;NM_000365;NM_001159287	7167	0	0	0	0	0	0	0	0	0	0	0	0.0227273	0	0	0	0	0	0	0	0.0142857
chr12.6976950	0.694136	0.0301108	-	promoter	Cpg_island	TPI1	NR_027483;NM_000365;NM_001159287	7167	0	0	0	0	0	0	0	0	0	0	0	0.0227273	0	0	0	0	0	0	0.0172414	0
chr4.7033863	-15.0452	0.0350089	-	utr3	intercpg	TBC1D14	NM_001113363;NM_020773;NM_001113361	57533	0.892857	0.588235	0.782609	0.764706	0.805556	NA	1	0.947368	0.714286	0.735294	0.837209	0.717949	0.767857	0.625	0	0.95	0.541667	0.695652	0.705882	0.463415
chr4.7044289	8.20039	0.0035387	-	promoter	Cpg_island	LOC100129931	NR_033828	100129931	NA	0	NA	0	0	0	0	0	0	0	0	0.272727	0.047619	0.111111	0.0769231	0	NA	0	0.2	0
chr12.7052445	3.96869	0.0149807	+	promoter	North_shore	PTPN6	NM_080548	5777	0	0	0	0	0	0	0	0	0	0	0	0	0	0.133333	0	0.12987	0.0588235	0.0769231	0	0
chr4.7057255	15.1986	0.00942676	+	utr3	South_shore	LOC386597	NR_033997	386597	0.608696	0.928571	0.833333	1	0.8	NA	NA	0.2	0.888889	0.875	0.771429	1	0.944444	1	0.97561	1	1	0.875	0.8	0.666667
chr12.7071123	7.73894	0.0262297	+	promoter	intercpg	MIR200C	NR_029779	406985	0	0	0.2	0	0.0847458	0	0	0	0	0.0434783	0.00961539	0.26087	0.166667	0	0.220588	0	0.0571429	0.142857	0.103448	0.047619
chr12.7071383	29.0632	0.0186279	+	promoter	intercpg	MIR141	NR_029682	406933	0.0666667	0	0.2	NA	0.3	0.857143	NA	0.285714	0	0.5	0.166667	0.527778	0.333333	0.857143	0.615385	0.875	0.166667	0.6	0.5	0.363636
chr12.7071811	-10.1156	0.0163211	-	promoter	intercpg	MIR141	NR_029682	406933	1	0.761905	0.740741	1	0.977528	0.875	1	1	1	0.923077	1	0.976744	0.787879	0.657143	0.855422	0.878788	0.83871	0.9	0.958904	0.949367
chr12.7072413	-4.84846	0.0144706	+	promoter	intercpg	MIR200C	NR_029779	406985	1	1	NA	1	1	1	1	1	1	1	1	1	0.947368	1	1	1	0.9375	0.818182	1	0.85
chr12.7073016	6.27618	0.0423359	+	promoter	intercpg	MIR141	NR_029682	406933	0	0	0	0	0	NA	0	0	0	0	0.0769231	0.26087	0.0833333	0.0555556	0.0192308	0	0	0.166667	0	0.0526316
chr17.7082706	-12.1806	0.0368598	+	utr5	intercpg	ASGR1	NM_001671;NM_001197216	432	0.594595	0.2	0	0.125	0.243902	0.2	0.111111	0.4	0.2	0	0.289308	0	0.0816327	0.125	0.197183	0	0.163265	0.151515	0.0588235	0.0294118
chr18.7118127	6.61337	0.0293762	+	promoter	Cpg_island	LAMA1	NM_005559	284217	0	0	0	0	0	0	0	0	0	0	0	0.0833333	0	0	0.347826	0	0	0.133333	0	0
chr17.7120809	3.42024	0.0214036	+	utr5	North_shelf	DLG4	NM_001365;NM_001128827	1742	0	0	0	0	0	0	0	0	0	0	0	0.0555556	0.111111	0	0.114286	0	0	0	0	0
chr17.7123289	1.83878	0.0392085	+	utr5	Cpg_island	DLG4	NM_001365;NM_001128827	1742	0	0	0	0	0	0	0	0	0	0	0	0.103659	0	0	0.0151515	0.0128205	0	0	0	0
chr12.7127830	-8.0019	0.042645	+	promoter	South_shore	LPCAT3	NM_005768	10162	1	0.833333	0.833333	1	0.92	0.818182	1	0.95	0.791667	1	0.89375	0.875	0.666667	0.904762	0.849057	0.736842	0.875	0.894737	0.789474	0.964286
chr17.7165636	-19.5725	0.0408239	-	utr5	Cpg_island	CLDN7	NM_001185022;NM_001185023;NM_001307	1366	1	0.3125	0.294118	0.545455	0.390244	0.75	0.666667	0.173913	0.4	0.5	0.955556	0.376068	0.351351	0.242424	0.339286	0.366667	0.285714	0.25	0.384615	0.296296
chr17.7165697	7.06725	0.0284865	-	utr5	Cpg_island	CLDN7	NM_001185022;NM_001185023;NM_001307	1366	0	0.0769231	0.0909091	0	0	NA	0.193548	0	0.111111	0.1	0.0229885	0.104167	0.111111	0.0833333	0.0967742	0.186047	0.0952381	0.0833333	0.176471	0.115385
chr17.7165843	3.81637	0.0354526	-	utr5	Cpg_island	CLDN7	NM_001185022;NM_001185023;NM_001307	1366	0	0	0	0	0	NA	0	0	0	0	0	0	0.105263	0	NA	0	0	0.166667	0.0625	0
chr17.7166001	4.14499	0.0225196	+	utr5	Cpg_island	CLDN7	NM_001185022;NM_001185023;NM_001307	1366	0	0.05	0	0	0	NA	0	0	0	0.0384615	0	0.0851064	0.0625	0	0.0212766	0	0.0454545	0.0263158	0.233333	0.0322581
chr17.7166179	5.0745	0.00382946	-	utr5	Cpg_island	CLDN7	NM_001185022;NM_001185023;NM_001307	1366	0	0	NA	0	0	0	0	0	0	0	0	0.0526316	0	0.0769231	0	0	0.142857	0	0.157895	0.0344828
chr17.7166386	1.48753	0.0104791	-	promoter	South_shore	CLDN7	NM_001185022;NM_001185023;NM_001307	1366	0	0	0	0	0	0	0	0	0	0.0151515	0	0	0	0	0.0327869	0.0319149	0.04	0.0136986	0.03125	0
chr4.7193885	7.9819	0.0490512	+	promoter	North_shore	SORCS2	NM_020777	57537	0.3125	0	0.0833333	0	0.0740741	0	0	0	0	0.0909091	0.0813953	0.175926	0.1875	0.09375	0.0153846	0.0581395	0.133333	0.230769	0.0625	0.241379
chr17.7197879	1.53884	0.038297	-	promoter	Cpg_island	YBX2	NM_015982	51087	0	0	0	NA	0	0	0	0	0	0	0	0.047619	0	0	0	0	0	0.0666667	0	0.0285714
chr17.7197978	-4.23608	0.0404361	+	promoter	Cpg_island	YBX2	NM_015982	51087	0	0	0.0588235	NA	0.111111	0.0555556	0	0.230769	0	0	0	0	0	0	NA	0	0	0	0	0
chr17.7198264	3.76122	0.0299577	+	promoter	Cpg_island	YBX2	NM_015982	51087	0	0	0	NA	0	0	0	0	0	0	0	0.138889	0	0	0	0	0.138889	0	0	0.0555556
chr17.7198364	-2.42184	0.0243206	-	promoter	Cpg_island	YBX2	NM_015982	51087	0	0.0227273	0	0	0	0.0909091	0	0	0	0.09375	0.0493827	0	0	0	0	0	0	0	0	0
chr17.7198369	6.51907	0.0346921	+	promoter	Cpg_island	YBX2	NM_015982	51087	0	0	0	NA	0	0	0	0	0	0	0	0.171429	0.0512821	0	0	0.411765	0	0	0	0
chr17.7198400	-6.72218	0.0067089	-	promoter	Cpg_island	YBX2	NM_015982	51087	0	0.0909091	0	0	0.0357143	0	0	0.28	0	0.125	0.123457	0	0	0	0	0	0	0	0	0
chr17.7198686	-15.6754	0.0434195	-	promoter	North_shore	YBX2	NM_015982	51087	0.35	0.625	0.473684	0.771429	0.428571	NA	NA	0.416667	0.166667	0.551724	NA	0.45	0.555556	0.238095	0.4	0.384615	0.222222	0.266667	0.117647	0.3
chr17.7199628	-8.69509	0.0495987	-	promoter	North_shore	YBX2	NM_015982	51087	0	0.153846	0.285714	0	0.136364	0	NA	0.416667	0.181818	0.105263	0.05	0.0454545	0.097561	0.1875	0	0	0	0	0	0
chr17.7219025	5.74549	0.0368145	+	promoter	South_shore	GPS2	NM_004489	2874	0	0	0	NA	0	0	0	0	0	0	0	0.186441	0.0833333	0	0	0	0	0.1	0	0
chr17.7219619	-7.4662	0.0171628	+	promoter	South_shore	NEURL4	NM_032442;NM_001005408	84461	1	0.777778	1	1	0.95	1	0.777778	0.96	1	1	1	0.989362	0.833333	0.75	0.857143	0.903226	0.888889	0.95	0.888889	0.888889
chr12.7248770	-13.5908	0.0298805	-	utr3	intercpg	C1R	NM_001733	715	0.833333	1	1	1	1	1	NA	1	1	NA	1	0.6	0.692308	0.75	1	0.813333	1	1	0.6	1
chr17.7254624	0.993197	0.0137778	-	promoter	Cpg_island	TMEM95	NM_198154	339168	0	0	0	0	0	0	0	0	0	0	0	0.0122699	0.0298507	0	0	0.0365854	0.0127389	0	0	0
chr17.7254643	0.90194	0.0283799	-	promoter	Cpg_island	TMEM95	NM_198154	339168	0	0	0	0	0	0	0	0	0	0	0	0	0.0606061	0	0	0	0.0128205	0	0.0208333	0.0178571
chr17.7254707	8.66068	0.030914	+	promoter	Cpg_island	ACAP1	NM_014716	9744	NA	0	0	0	0	0	0	0	0	0	0	0.555556	0.0714286	0	0	0	0	0	0	0.176471
chr17.7254717	8.64143	0.0324753	+	promoter	Cpg_island	KCTD11	NM_001002914	147040	NA	0	0	0	0	0	0	0	0	0	0	0.588235	0.0384615	0	0	0	0	0	0	0.192308
chr17.7254735	13.1925	0.0286695	+	promoter	Cpg_island	TMEM95	NM_198154	339168	NA	0	0	0	0	0	0	0	0	0	0	0.625	0	0	0	0	0.285714	0	0	0.428571
chr17.7255808	2.26204	0.00884472	-	utr5	Cpg_island	TMEM95	NM_198154	339168	0	0	0	0	0	0	0	0	0	0	0	0.0194175	0	0	0.0495049	0.0888889	0.0338983	0	0	0
chr17.7308370	1.58726	0.0357311	-	promoter	Cpg_island	C17orf61	NM_152766	254863	0	0	0	0	0	0	0	0	0	0	0	0.0246914	0	0.05	0	0.0333333	0	NA	0	0
chr17.7308509	4.38259	0.00781518	+	promoter	Cpg_island	C17orf61	NM_152766	254863	0	0	0	0	0	0	0	0	0	0	0	0.0588235	0	0	0.0333333	0.15	0	0	NA	0
chr17.7321693	-10.4626	0.018625	-	utr3	South_shore	NLGN2	NM_020795	57555	1	0.846154	0.928571	1	0.916667	1	1	NA	1	0.875	1	1	0.923077	0.8125	0.695652	0.8	0.8	1	0.833333	0.863636
chr17.7341520	-21.2408	0.0112001	+	promoter	North_shore	FGF11	NM_004112	2256	0	0.0833333	NA	NA	0.6	0.2	NA	0.75	0.0952381	0.166667	0.222222	0	NA	0	0.0833333	0	0.153846	0	0	0
chr17.7341550	-19.1293	0.0316132	+	promoter	North_shore	FGF11	NM_004112	2256	0.0833333	0.142857	NA	NA	0.6	0.2	NA	0.75	0.181818	0.285714	0.222222	0	NA	0.333333	0.0833333	0	0.142857	0	0.0714286	0.294118
chr17.7341568	-3.93389	0.029183	+	promoter	North_shore	FGF11	NM_004112	2256	0	0.142857	NA	NA	0	0	NA	0	0	0.125	0.0526316	0	NA	0	0	0	0	0	0	0
chr17.7341740	19.7999	0.0191554	+	promoter	North_shore	FGF11	NM_004112	2256	0	0	NA	0	0	NA	NA	0	0	0.1	0	0	0	0.5	0.73913	0.4	0	0	0.277778	0.1875
chr17.7348323	-4.06448	0.022266	-	promoter	Cpg_island	CHRNB1	NM_000747	1140	0	0.0833333	0	0	0	0.0769231	0.0666667	0	0.153846	0.0625	0	NA	0	0	0	0	0	0	0	0
chr17.7348328	-6.49087	0.0150849	-	promoter	Cpg_island	CHRNB1	NM_000747	1140	0	0.25	0	0	0.142857	0	0.0666667	0	0.153846	0	0.0784314	NA	0	0	0	0	0	0	0	0
chr17.7389376	2.1697	0.033439	+	promoter	South_shore	POLR2A	NM_000937	5430	0	0	0	0	0	0	0	0	0	0	0	0.0384615	0	0	0.0909091	0	0	0	0	0
chr4.7434661	-15.1839	0.0272644	+	utr3	intercpg	PSAPL1	NM_001085382	768239	0.478261	0.268293	0.125	0	0.293103	0.363636	0.8	0.375	0.357143	0.235294	0.0543478	0.2375	0.142857	0.266667	0.0625	0.0869565	0	0.0769231	0.037037	0.178571
chr10.7452810	6.53301	0.0256722	+	promoter	Cpg_island	SFMBT2	NM_001029880;NM_001018039	57713	NA	0	NA	0	0	0	0	0	0	0	0	0.272727	0	0.125	0	0	0	NA	0.111111	0
chr10.7453823	4.87882	0.0229297	-	promoter	Cpg_island	SFMBT2	NM_001029880;NM_001018039	57713	0	0	0	0	0	0	0	0	0	0	0	0.0909091	0.333333	NA	0	0	0	0	0	0.125
chr10.7453869	2.36773	0.0057712	+	promoter	Cpg_island	SFMBT2	NM_001029880;NM_001018039	57713	0	0	0	0	0.0151515	0	NA	0	0	0	0	0.0731707	0.0263158	0	0	0.0277778	0	0.0357143	0.06	0
chr10.7454701	4.20865	0.0349841	+	promoter	Cpg_island	SFMBT2	NM_001029880;NM_001018039	57713	0	0	0	0	0	0	0	0	0	0	0	0.213793	0	0.0322581	0	0	0	0	0	0.019802
chr4.7461251	-6.75662	0.0237987	+	promoter	intercpg	MIR4274	NR_036238	100422826	1	1	NA	1	1	0.857143	1	NA	1	1	1	1	1	0.875	0.884615	1	0.823529	0.9	0.809524	1
chr4.7461294	-14.05	0.0163303	-	promoter	intercpg	MIR4274	NR_036238	100422826	1	0.888889	0.916667	0.965517	0.923077	0.833333	1	1	1	0.875	1	0.961538	1	0.5	0.666667	0.666667	0.333333	0.888889	1	0.891892
chr17.7486757	14.4956	0.0222758	+	promoter	Cpg_island	MPDU1	NR_024603;NM_004870	9526	0.162791	0	0	0	0.230769	NA	0	0	0.0869565	0.0952381	0	0.137931	0.190476	0.117647	0.0689655	0.304348	0.470588	0	0.222222	0.416667
chr17.7493302	-8.24545	0.0391118	-	utr5	South_shore	SOX15	NM_006942	6665	0.244275	0.135802	0.0526316	0	0.394737	0.2	0.314286	0.025974	0.0588235	0.148936	0.0350877	0	0	0.0882353	0.0294118	0	0.0571429	0.0508475	0.0666667	0.135802
chr19.7505013	-11.5405	0.0118002	-	utr5	Cpg_island	ARHGEF18	NM_001130955;NM_015318	23370	1	1	1	1	0.75	0.875	1	1	1	1	1	1	0.9	0.866667	0.851852	0.909091	0.923077	0.5	1	0.75
chr6.7541698	4.34426	0.0261614	+	promoter	Cpg_island	DSP	NM_001008844;NM_004415	1832	0	0	0	0	0	0	0	0	0	0	0	0.0833333	0	0	0.215686	0	0	0	0	0.0357143
chr6.7541974	-5.22337	0.0418801	+	utr5	Cpg_island	DSP	NM_001008844;NM_004415	1832	0	0.1	0.222222	NA	NA	0	0	NA	0	0	0.12	0	0	0	NA	0	0	0	0	0
chr19.7542049	-19.2737	0.0411858	+	utr3	North_shore	LOC100128573	NR_024491	100128573	0.857143	0.431373	0.416667	0.909091	0.482759	0.5	NA	0.733333	0.481481	0.4	0.615385	0.518519	0.1875	0.3125	0.0909091	0.157895	0.392157	0.535714	0.5	0.730769
chr17.7552934	-5.97084	0.00746213	-	promoter	North_shore	ATP1B2	NM_001678	482	1	1	1	1	0.923077	NA	1	1	NA	0.96	NA	0.954198	0.923077	0.875	0.960784	0.84375	0.75	0.833333	1	0.947368
chr19.7598439	34.3765	0.0107601	-	promoter	Cpg_island	MCOLN1	NM_020533	57192	0	0.5625	NA	0	0.607843	0.454545	0.153846	0	0.511111	0.564103	0.571429	0.692308	0.5	0.666667	0.933333	0.625	0.363636	0.411765	1	0.672131
chr19.7598493	4.02046	0.0469247	+	promoter	Cpg_island	PNPLA6	NM_001166111;NM_001166113;NM_001166112;NM_001166114;NM_006702	10908	0.0344828	0.0666667	0.027027	0.121951	0.0208333	0	0	0	0	0.0526316	0	0.0744681	0.142857	0	0.0357143	0.0540541	0.0714286	0	0.0740741	0.137931
chr19.7598496	2.51924	0.00530447	+	promoter	Cpg_island	MCOLN1	NM_020533	57192	0.0344828	0	0	0	0	0	0	0	0	0	0	0.0425532	0	0.0588235	0.0357143	0	0.0714286	0	0	0
chr19.7598504	2.72533	0.00340517	+	promoter	Cpg_island	MCOLN1	NM_020533	57192	0.0344828	0	0	0	0	0	0	0	0	0	0	0.0421053	0	0	0.0352941	0.0540541	0.0689655	0	0	0
chr19.7598510	1.3721	0.0200646	-	promoter	Cpg_island	MCOLN1	NM_020533	57192	0	0	0	0	0	0	0	0	0	0	0	0.014218	0	0	0.0512821	0	0	0	0	0.0333333
chr19.7598535	4.71837	0.0440085	-	promoter	Cpg_island	PNPLA6	NM_001166111;NM_001166113;NM_001166112;NM_001166114;NM_006702	10908	0	0.125	0.0952381	0	0.0166667	0.0588235	0	0.0294118	0.105263	0.037037	0	0.0471698	0	0.153846	0.0512821	0.0377358	0.148148	0.208333	0.0333333	0.05
chr19.7680548	23.1656	0.0315024	+	promoter	Cpg_island	KIAA1543	NM_020902;NM_001080429	57662	0.0769231	0.294118	0.666667	0	0.210526	0.222222	NA	0.15	0.227273	0.0454545	0	1	0.0344828	0.444444	0.314286	0.5	0.36	0.263158	0.296296	0.517241
chr19.7680624	16.9912	0.0182438	+	promoter	South_shore	KIAA1543	NM_020902;NM_001080429	57662	0.818182	0.823529	0.583333	0.125	0.706667	0.555556	NA	0.55	0.772727	0.636364	0.447761	1	0.862069	0.888889	0.857143	0.655172	0.84	0.631579	0.777778	0.633333
chr19.7680625	20.2493	0.00360296	-	promoter	South_shore	KIAA1543	NM_020902;NM_001080429	57662	0.525	0.695652	0.714286	1	0.574074	0.7	0.684211	0.423077	0.428571	0.619048	0.54902	1	0.918919	0.5625	0.833333	0.714286	0.814815	0.722222	0.73913	0.757576
chr19.7680797	1.59834	0.0443206	+	promoter	North_shore	KIAA1543	NM_020902;NM_001080429	57662	0	0	0	0	0	0	0	0	0	0	0	0.0408163	0	0	0	0	0.0833333	0	0	0
chr11.7695466	5.55413	0.0384721	-	promoter	Cpg_island	CYB5R2	NM_016229	51700	0	0	NA	0	0	NA	0	0	0	0	0	0	0	0	0	NA	0.0588235	0.333333	0.157895	0
chr6.7726295	1.42703	0.0491223	+	promoter	Cpg_island	BMP6	NM_001718	654	0	0	0	0	0	0	0	0	0	0	0	0.0103093	0.015873	0	0	0	0	0	0.12	0
chr19.7733959	-19.1577	0.0146829	-	promoter	North_shore	RETN	NM_020415;NM_001193374	56729	NA	0.727273	0.933333	NA	0.710526	0.818182	1	0.857143	0.736842	0.5625	0.970588	0.415094	0.705882	0.85	0.611111	0.58	0.541667	0.809524	0.758621	0.407407
chr17.7761981	13.1189	0.0353164	+	promoter	South_shore	CYB5D1	NM_144607	124637	0	0.0588235	0	0	0.230769	0.428571	0	0.0588235	0.0434783	0.137931	0.287879	0.0571429	0.0694444	0.142857	0.217391	0.428571	0.190476	0.217391	0.166667	0.409091
chr17.7819755	2.21508	0.0451414	-	promoter	Cpg_island	LOC284023	NR_024349	284023	0	0	0	0	0	0	NA	0	0	0	0	0	0	0.1	0	0	0.0588235	0	0.0625	0
chr17.7819762	5.35096	0.0204082	+	promoter	Cpg_island	LOC284023	NR_024349	284023	0	0	0	0	0.0512821	0	0	0	0	0.0769231	0	0	0.25	0.0909091	0.12	0.0344828	0	0	0.190476	0.02
chr17.7826199	2.82606	0.0415092	-	utr3	Cpg_island	KCNAB3	NM_004732	9196	0	0	0	0	0	0	0	0	0	0	0	0.0121951	0	0	0	0.173913	0	0.0689655	0	0
chr17.7826353	2.95639	0.0313659	+	utr3	Cpg_island	KCNAB3	NM_004732	9196	0	0	0	0	0	0	0	0	0	0	0	0.122449	0.0625	0	0	0	0.0357143	0	0	0
chr10.7830420	3.10422	0.0398589	+	promoter	Cpg_island	KIN	NM_012311	22944	0	0	0	0	0	0	NA	0	0	0	0	0.12	0	0	0	0.0625	0	0	0	0
chr17.7836490	-5.49121	0.016066	-	promoter	South_shore	CNTROB	NM_001037144;NM_053051	116840	0.166667	0	0	0	0.0731707	0	0	0.136364	0.0833333	0.0384615	0.142857	0	0	0.1	0	0	0	0	0	0
chr1.7843434	8.6615	0.0346081	+	promoter	North_shore	PER3	NM_016831	8863	0	0	0	0	0	0	0	0	0	0.047619	0	0.1875	0	0	0.428571	0	NA	0.0714286	0	0.0833333
chr1.7844499	2.83796	0.0278107	-	utr5	Cpg_island	PER3	NM_016831	8863	0	0	0	NA	0	0	0	0	0	0	0	0.0357143	0	0.2	0	0	0	0	0.0869565	0
chr6.7911603	16.0577	0.0333158	+	promoter	South_shore	MUTED-TXNDC5	NR_037616	-	0.304348	0.380952	0.9	0	0.71875	0.636364	1	0.697674	0.846154	0.695652	0.806122	0.875	0.821429	0.869565	0.939394	0.805556	0.795455	0.642857	0.941176	0.675
chr19.7928636	-14.8369	0.0254268	+	utr3	Cpg_island	EVI5L	NM_145245;NM_001159944	115704	1	1	1	1	0.666667	1	NA	1	0.444444	1	1	1	NA	0.571429	0.95	0.928571	0.8	0.888889	0.714286	0.766667
chr19.7928686	-7.54034	0.01179	+	utr3	Cpg_island	EVI5L	NM_145245;NM_001159944	115704	1	1	1	1	1	1	NA	1	0.837838	1	1	0.924812	0.931034	0.871795	1	0.774194	0.888889	1	0.913793	1
chr19.7928688	-7.65347	0.0435917	+	utr3	Cpg_island	EVI5L	NM_145245;NM_001159944	115704	1	0.931034	1	1	1	0.777778	NA	1	0.828571	1	1	0.818182	0.777778	0.971429	1	0.903226	0.777778	1	0.907407	0.939394
chr19.7933862	2.92025	0.0351943	+	utr3	Cpg_island	FLJ22184	NM_001190467	80164	0	0	0	0	0	0	0	0	0	0	0	0.133333	0	0.0689655	0	0	0	0	0.0857143	0
chr19.7953484	4.40831	0.0253839	+	utr5	Cpg_island	LRRC8E	NM_025061	80131	0	0	0	0	0	0	0	0	0.0322581	0	0	0.130435	0	0.027027	0.205128	0.0434783	0	0	0.0243902	0
chr19.7967754	6.26103	0.0495471	-	promoter	North_shore	MAP2K7	NM_145185	5609	0	0.15	0	0	0.0434783	0	0	0	0.1	0	0	0.214286	0.0833333	0.0740741	0	0.2	0.0222222	0.0263158	0.0606061	0
chr19.7978324	16.6166	0.0483815	+	utr3	South_shore	LOC645781	NM_001195259	645781	0.333333	0.15	0.566667	0.633803	0.0697674	0.333333	0.538462	0.333333	0.641509	0.719512	0.547368	0.733333	0.555556	0.76	0.558442	0.630952	0.685714	0.72	0.391304	0.505376
chr19.7981010	8.5523	0.0108743	-	promoter	Cpg_island	SNAPC2	NM_003083;NR_030717	6618	0	0.0416667	0	0	0	0	0	0.15	0	0	0	0	0.108108	0.0952381	0	0	0.230769	0.0952381	0.16	0.18
chr19.7989554	20.4494	0.0160325	+	utr3	Cpg_island	CTXN1	NM_206833	404217	0.272727	0.631579	0.272727	NA	0.539683	0.65	0	0.555556	0.6	0.318182	0.301205	0.684211	0.4375	0.611111	0.789474	0.6	0.583333	0.913043	0.642857	0.444444
chr19.7989596	-14.1713	0.0337055	+	utr3	Cpg_island	CTXN1	NM_206833	404217	0.357143	0.571429	NA	NA	0.510204	0.266667	0	0.391304	0.357143	0.428571	0.575	0.225806	0.133333	0.2	0.4375	0.368421	0.6	0.333333	0.333333	0.142857
chr19.7989649	14.527	0.0139205	-	utr3	Cpg_island	CTXN1	NM_206833	404217	0	0.212121	0	0	0.207547	0.125	0	0.131579	0.24	0.228571	0	0.206897	0.219512	0.178571	0.233766	0.384615	0.0769231	0.375	0.0909091	0.333333
chr19.7989926	3.90179	0.0482099	-	utr3	Cpg_island	CTXN1	NM_206833	404217	0	0.0833333	0	0	0	0	0	0	0.0588235	0	0	0.103448	0	0.1	0	0	0.111111	0	0.0833333	0
chr19.7991828	-8.36292	0.0340301	+	promoter	North_shore	TIMM44	NM_006351	10469	0.297872	0.117647	0.136364	0	0.285714	0.178571	0.147059	0.315789	0.24	0.28125	0.120567	0.193548	0.186047	0.0294118	0	0.103448	0.21875	0.025641	0.138889	0.139535
chr19.7991894	-14.9784	0.0494663	-	promoter	Cpg_island	TIMM44	NM_006351	10469	0.585366	0.517241	0.923077	0.609756	0.605263	0.727273	1	0.771429	0.5	0.619048	0.632911	0.837838	0.5	0.171429	0.367347	0.607143	0.545455	0.4	0.5	0.608696
chr19.7991896	-16.9412	0.0337276	-	promoter	Cpg_island	CTXN1	NM_206833	404217	0.853659	0.448276	0.769231	0.487805	0.526316	0.454545	0	0.771429	0.222222	0.428571	0.797468	0.486486	0.458333	0.411765	0.44	0.357143	0.272727	0.3	0.32	0.454545
chr19.7992696	-27.6803	0.000751074	+	promoter	South_shore	TIMM44	NM_006351	10469	0.680851	0.333333	0.631579	0.777778	0.268817	0.333333	0.861111	0.510204	0.365854	0.464286	0.390533	0.444444	0.181818	0.285714	0.12766	0.148148	0.235294	0.117647	0.0882353	0.22807
chr19.7992770	31.0719	0.000284568	+	promoter	South_shore	TIMM44	NM_006351	10469	0.030303	0.333333	0.1875	0	0.0606061	0	0	0.0740741	0.0625	0.166667	0.0294118	0.426471	0.44	0.333333	0.633333	0.736842	0.357143	0.125	NA	0.0588235
chr7.8008604	-0.403085	0.0346977	+	promoter	Cpg_island	TIMM44	NM_006351	10469	0	0.0075188	0	0	0.010989	0	0.03125	0	0	0	0	0	0	0	0	0	0	0	0	0
chr19.8008882	6.72891	0.0211218	-	promoter	Cpg_island	TIMM44	NM_006351	10469	0	0	0	0	0	0	0	0	0	0	0	0.3	0	0.0555556	NA	0	0	0	0.153846	0
chr4.8009562	-7.2131	0.0382199	+	utr3	intercpg	ABLIM2	NM_001130085;NM_001130083;NM_032432;NM_001130087;NM_001130086;NM_001130084;NM_001130088	84448	1	1	1	1	1	0.888889	1	1	1	1	1	0.982456	0.967742	0.875	0.66	1	0.761905	1	1	1
chr12.8025452	6.9855	0.0147133	-	utr5	Cpg_island	SLC2A14	NM_153449	144195	0	0	NA	0	0	0	NA	0	0	0	0	0.03125	0	0	0	0.0952381	0.333333	0.333333	0	0
chr12.8072167	-8.25061	0.0389398	-	utr3	intercpg	SLC2A3	NM_006931	6515	1	0.833333	1	1	1	0.833333	1	NA	NA	0.909091	1	0.829787	NA	1	0.956522	0.871795	1	1	0.9	0.666667
chr4.8073788	-19.8761	0.00785625	-	promoter	intercpg	ABLIM2	NM_001130085;NM_001130083;NM_032432;NM_001130087;NM_001130086;NM_001130084;NM_001130088	84448	0.971014	0.90625	1	1	0.9	0.814815	0.555556	1	0.92	0.611111	0.969697	0.888889	0.6	0.727273	0.790698	0.66055	0.2	0.571429	0.764706	0.884615
chr17.8080088	3.27011	0.0249765	+	promoter	Cpg_island	TMEM107	NM_183065;NM_032354	84314	0	0.0625	0	0	0	0	0	0	0	0	0	0.12766	0	0.0384615	0	0	0.037037	0.0769231	0	0.0333333
chr1.8086509	0.94284	0.0493545	+	promoter	Cpg_island	ERRFI1	NM_018948	54206	0	0	0	0	0	0	0	0	0	0	0	0.0357143	0	0	0.0327869	0	0	0	0	0
chr1.8086640	1.82623	0.0171166	+	promoter	Cpg_island	ERRFI1	NM_018948	54206	0	0	0	0	0	0	0	0	0	0	0	0.0461538	0.0285714	0.0416667	0	0	0	0	0	0
chr1.8086641	-2.50634	0.0267208	-	promoter	Cpg_island	ERRFI1	NM_018948	54206	0	0.0444444	0	0	0	0	0	0.15625	0	0.0512821	0.0123457	0	0	0	0	0	0	0	0	0
chr1.8086696	4.09135	0.0394474	+	promoter	Cpg_island	ERRFI1	NM_018948	54206	0	0	0	0	0	0	0	0	0	0	0	0.266667	0	0.0344828	0	0	0	0	0	0.0273973
chr1.8086720	3.41793	0.0302104	-	promoter	Cpg_island	ERRFI1	NM_018948	54206	0	0.038835	0.0454545	0	0	0.0588235	0	0	0.0666667	0.0206186	0	0.028169	0.0864198	0.0561798	0	0	0.0365854	0.107143	0.0722892	0.06
chr17.8113905	2.11974	0.0322395	-	utr5	Cpg_island	AURKB	NM_004217	9212	0	0	0	NA	0	0	0	0	0	0	0	0.0506329	0.0606061	0	0	0	0	0	0.0909091	0
chr17.8113908	5.32751	0.0116879	-	utr5	Cpg_island	AURKB	NM_004217	9212	0	0	0	NA	0	0	0	0	0	0	0	0.151899	0.0588235	0	0	0.0810811	0	0	0.166667	0
chr17.8130135	4.32942	0.0213598	+	utr3	South_Shelf	C17orf44	NR_026951	284029	0	0	0	NA	0	0	0	0	0	0	0	0.16129	0.0416667	0	0	0.03125	0	0	0	0.0454545
chr17.8130167	9.61655	0.00568135	+	utr3	South_Shelf	C17orf68	NM_025099	80169	0	0	0	NA	0.027027	0	0	0	0	0.0769231	0	0.247312	0	0.0555556	0.119403	0	0.125	0.192308	0.0769231	0.136364
chr17.8198786	3.50092	0.026478	+	promoter	Cpg_island	SLC25A35	NM_201520	399512	0	0	0	0	0	0	0	0	0	0	0	0	0	0	0.15873	0	0	0.0555556	0.0526316	0
chr19.8213612	4.36518	0.0298714	+	promoter	North_shore	FBN3	NM_032447	84467	0	0	0.157895	0	0	0.0434783	0	0.0454545	0	0	0	0.0625	0.105263	0.0909091	0	0.0294118	0	0.0555556	0.0689655	0.103448
chr17.8225635	-14.509	0.0368664	-	utr3	intercpg	ARHGEF15	NM_025014;NM_173728	22899	1	0.792683	0.83871	0.793103	0.906542	0.9	NA	0.780488	0.586957	0.72093	0.991803	0.9	0.794872	0.551724	0.55102	0.736842	0.774648	0.405405	0.844828	0.772152
chr8.8239292	2.9036	0.00922374	+	utr5	intercpg	SGK223	NM_001080826	157285	0	0	0	0	0	0	0	0	0	0	0	0.2	0	0	0.0425532	0.037037	0.0769231	0	0	0
chr17.8276727	-8.10352	0.0442686	+	promoter	North_shelf	KRBA2	NM_213597	124751	1	0.85	0.933333	1	0.978723	0.916667	1	1	1	1	1	1	0.636364	0.666667	0.96	0.826087	0.941176	0.8	1	1
chr17.8286867	4.647	0.0234675	+	promoter	Cpg_island	RPL26	NM_000987	6154	0	0	0	0	0	0	0	0	0	0	0	0.236842	0	0	NA	0	0.0689655	0	0.0454545	0
chr4.8307998	16.7523	0.0401749	-	utr3	Cpg_island	HTRA3	NM_053044	94031	0.421053	0.535714	0.736842	0.769231	0.631579	0.8	0.888889	NA	0.642857	0.722222	0.733333	1	0.818182	1	0.9	0.5625	0.666667	1	0.526316	0.944444
chr19.8374125	20.9383	0.0232214	-	promoter	South_shore	CD320	NM_016579;NM_001165895	51293	0.8125	0.666667	0.461538	0.125	0.5	0.5	NA	0.4	0.4	0.666667	0.36	0.44898	0.716981	0.923077	1	0.695652	0.6	0.714286	NA	0.733333
chr1.8378002	5.53005	0.00307688	+	promoter	Cpg_island	-	-	-	0	0.0238095	0	0	0	0	0	0	0	0.0666667	0	0.105263	0.285714	0.0909091	0	0	0.03125	0.0322581	0.0540541	0.0833333
chr1.8378060	3.22298	0.0267145	+	promoter	Cpg_island	-	-	-	0	0	0	0	0	0	0	0	0	0	0	0.0779221	0.2	0	0	0	0	0	0.0384615	0
chr1.8378100	-4.95784	0.0140101	-	promoter	Cpg_island	-	-	-	0.2	0.0769231	0	NA	0.037037	0	0	0	0	0	0.0946746	0	0	0	0	0	0	0	0	0
chr19.8386272	4.24087	0.0301314	+	promoter	Cpg_island	RPS28	NM_001031	6234	0	0	NA	0	0	0	0	0	0	0	0	0.122951	0.0454545	0.136364	0	0	0	0	0	0
chr1.8404078	-30.3701	0.0280093	-	utr3	Cpg_island	SLC45A1	NM_001080397	50651	0.4	0.333333	0.26087	0.354839	0.333333	0.5	0.941176	NA	NA	0.333333	1	0	NA	0.375	0.392857	0.357143	0.285714	0.26087	0.137931	0
chr4.8440675	9.16486	0.0438386	-	promoter	North_shore	ACOX3	NM_001101667;NM_003501	8310	NA	0.638554	0.75	NA	0.612245	0.866667	0.428571	0.769231	0.764706	0.6875	0.75	1	0.65	0.68	0.658537	0.76	0.771429	0.8	0.897436	0.818182
chr5.8457971	1.27108	0.0379365	-	promoter	Cpg_island	-	-	-	0	0	0	0	0	0	NA	0	0	0	0	0.0555556	0	0	0.0151515	0	0	0	0	0
chr5.8457980	12.5333	0.0380768	-	promoter	Cpg_island	-	-	-	0	0.107143	0	0.0487805	0.283333	0.266667	NA	0.133333	0.170213	0.238095	0.0330579	0.361111	0.44	0.0909091	0.248175	0.416667	0.183673	0.0227273	0.232558	0.296296
chr5.8457993	17.1214	0.0273843	-	promoter	Cpg_island	-	-	-	0.0454545	0.2	0	0.047619	0.319328	0.2	NA	0.0666667	0.212766	0.363636	0	0.416667	0.615385	0.0909091	0.408759	0.416667	0.16	0.0434783	0.26087	0.296296
chr5.8458041	17.4302	0.0259249	-	promoter	Cpg_island	-	-	-	0.75	0.142857	0.142857	0.1	0.25	0	0.25	0	0.25	0.2	0.04	0.625	NA	0.375	0.478261	0.307692	0.2	0.166667	0.25	0.238095
chr5.8458076	19.2507	0.0429694	-	promoter	Cpg_island	-	-	-	NA	NA	0	0	0.222222	0	0	0.142857	0.1	0.0909091	NA	0.6	0.208333	0.0909091	0.619048	0.5	NA	0	0	0
chr19.8468827	-16.6446	0.0196654	+	utr3	Cpg_island	RAB11B	NM_004218	9230	NA	0.565217	1	1	0.833333	0.6	1	0.888889	0.75	0.833333	0.848485	0.705882	0.923077	0.529412	0.609756	0.727273	0.583333	0.4	0.888889	0.62963
chr7.8473428	-1.83767	0.0369937	-	promoter	Cpg_island	NXPH1	NM_152745	30010	0	0	NA	0	0.0714286	0	0	0	0.0434783	0.0588235	0	0	0	0	0	0	0	0	0	0
chr7.8473470	5.03055	0.015103	-	promoter	Cpg_island	NXPH1	NM_152745	30010	0	0.02	0	0	0	0	0	0.0434783	0.05	0	0.0520833	0.147059	0.0606061	0.105263	0.175	0	0.0338983	0.0416667	0.0666667	0.0208333
chr7.8473512	3.05427	0.0237369	+	promoter	Cpg_island	C2orf46	NR_034135	339789	0	0	0	0	0	0	0	0.0571429	0	0.037037	0	0.0458716	0	0.030303	0.0212766	0.09375	0.105263	0	0.0227273	0
chr19.8503444	1.98807	0.0439456	+	utr3	intercpg	2015-03-02	NM_016496;NM_001005416;NM_001005415	51257	0	NA	0	0	0	NA	0	0	0	0	0	0.0598291	0	0	0.0277778	0	0	0	0	0.0512821
chr19.8503750	-10.3123	0.0039707	+	utr3	intercpg	2015-03-02	NM_016496;NM_001005416;NM_001005415	51257	1	0.75	0.933333	1	0.958333	1	1	1	1	1	0.939655	0.941176	0.928571	0.714286	0.852941	0.772727	1	0.666667	0.9	0.846154
chr8.8559133	1.34369	0.0159877	-	promoter	Cpg_island	CLDN23	NM_194284	137075	0	0	0	NA	0	0	0	0	0	0	0	0.0375	0.04	0	0	0	0.0188679	0	0	0
chr8.8559741	-3.37227	0.0197779	+	utr5	Cpg_island	CLDN23	NM_194284	137075	0.111111	0	0	0	0.137931	0	0	0	0.0333333	0	0.03125	0	0	0	0	0	0	0	0	0
chr8.8560855	-7.23223	0.031103	-	utr3	Cpg_island	CLDN23	NM_194284	137075	1	0.904762	0.866667	1	1	0.875	1	1	0.9375	0.916667	0.945205	0.828283	1	1	0.848485	0.973684	0.759259	0.882353	0.870968	0.814815
chr4.8582287	4.11745	0.0372478	+	utr5	Cpg_island	GPR78	NM_080819	27201	0	0	0	0	0	NA	NA	0.05	0	0.0384615	0	0	0.125	0.0181818	0.176471	0.025641	0	0	0.111111	0.0416667
chr4.8582430	2.20723	0.0173774	+	utr5	Cpg_island	GPR78	NM_080819	27201	0	0	0	0	0	0	0	0	0	0	0	0.0740741	0	0	0	0.03125	0	0	0.0769231	0
chr4.8582437	2.72485	0.0164562	+	utr5	Cpg_island	GPR78	NM_080819	27201	0	0	0	0	0	0	0	0	0	0	0	0.0740741	0	0	0	0	0	0.0714286	0	0.0769231
chr4.8582554	5.31271	0.00831988	+	utr5	Cpg_island	GPR78	NM_080819	27201	0	0	0	0	0	0	0	0	0	0	0	0.2	0.176471	0	0	0.0689655	0	0	0.0606061	0
chr4.8582620	-3.78651	0.0166449	+	utr5	Cpg_island	GPR78	NM_080819	27201	0	0.111111	0.166667	NA	0.037037	0	NA	NA	0.0666667	0	0	0	0.0227273	0	0	0	0	0	0	0
chr4.8594414	0.743495	0.0498078	-	utr5	Cpg_island	CPZ	NM_001014447;NM_003652;NM_001014448	8532	0	0	0	NA	0	0	0	0	0	0	0	0.0224719	0	0	0	0	0	0	0.0322581	0
[truncated: 11,132 more rows]
